# Supplementary material
Source: publisher figshare collection journal article supplement (https://gsajournals.figshare.com/ndownloader/files/23715623)
Supplement: Supplementary file 1 [file 23715623]

## Sheet: High
CHROM	POS	REF	ALT	allele_set	aaf	call_rate	is_snp	is_indel	is_transition	nucl_diversity	num_called	num_het	num_hom_alt	num_hom_ref	ANN	Mutation type	Impact	Gene name	WBGene ID	Transcript?	Gene ID	Gene Type
II	11547547	C	[G]	{C, G}	0.121212	1	TRUE	FALSE	FALSE	0.214666	66	0	8	58	G	stop_gained	HIGH	F54D5.7	WBGene00010052	transcript	F54D5.7.1	protein_coding
II	11555962	G	[T]	{G, T}	0.030303	1	TRUE	FALSE	FALSE	0.0592181	66	0	2	64	T	start_lost	HIGH	WBGene00271798	WBGene00271798	transcript	F54D5.24	protein_coding
II	11557012	T	[G]	{G, T}	0.0757576	1	TRUE	FALSE	FALSE	0.141106	66	0	5	61	G	splice_donor_variant&intron_variant	HIGH	F54D5.17	WBGene00195146	transcript	F54D5.17	protein_coding
II	11557090	G	[T]	{G, T}	0.0151515	1	TRUE	FALSE	FALSE	0.0300717	66	0	1	65	T	stop_gained	HIGH	F54D5.17	WBGene00195146	transcript	F54D5.17	protein_coding
II	11557150	ATTTTCAAT	[A]	{ATTTTCAAT, A}	0.0151515	1	FALSE	TRUE	FALSE	0.0300717	66	0	1	65	A	frameshift_variant	HIGH	F54D5.17	WBGene00195146	transcript	F54D5.17	protein_coding
II	11557157	A	[AT]	{AT, A}	0.166667	1	FALSE	TRUE	FALSE	0.279898	66	0	11	55	AT	frameshift_variant	HIGH	F54D5.17	WBGene00195146	transcript	F54D5.17	protein_coding
II	11558297	C	[CTATATATT, CGATATATT, CAATATATT]	{C, CGATATATT, CTATATATT}	0.030303	1	FALSE	TRUE	FALSE	0.0592181	66	2	1	63	CAATATATT	frameshift_variant	HIGH	WBGene00271798	WBGene00271798	transcript	F54D5.24	protein_coding
II	11558298	G	[GATATATTT]	{G, GATATATTT}	0.181818	1	FALSE	TRUE	FALSE	0.299792	66	8	8	50	GATATATTT	frameshift_variant	HIGH	WBGene00271798	WBGene00271798	transcript	F54D5.24	protein_coding
II	11558300	T	[TATATTAA, TATATTTAA, TATATTTA, TATATTTAG]	{TATATTTAG, T}	0.0151515	1	FALSE	TRUE	FALSE	0.0300717	66	0	1	65	TATATTAA	frameshift_variant	HIGH	WBGene00271798	WBGene00271798	transcript	F54D5.24	protein_coding
II	11563304	G	[A]	{G, A}	0.0153846	1	TRUE	FALSE	TRUE	0.0305307	65	0	1	64	A	stop_gained	HIGH	F54D5.15	WBGene00010057	transcript	F54D5.15a	protein_coding
II	11588986	T	[A]	{A, T}	0.0151515	1	TRUE	FALSE	FALSE	0.0300717	66	0	1	65	A	splice_acceptor_variant&intron_variant	HIGH	F07A11.1	WBGene00008545	transcript	F07A11.1	protein_coding
II	11607112	ACTCATC	[A]	{ACTCATC, A}	0.0169492	1	FALSE	TRUE	FALSE	0.0336086	59	0	1	58	A	stop_gained&disruptive_inframe_deletion	HIGH	F07A11.4	WBGene00008547	transcript	F07A11.4a	protein_coding
II	11641005	C	[G]	{C, G}	0.0153846	1	TRUE	FALSE	FALSE	0.0305307	65	0	1	64	G	stop_gained	HIGH	kin-6	WBGene00002194	transcript	ZK20.2	protein_coding
II	11679503	CA	[C]	{C, CA}	0.0625	1	FALSE	TRUE	FALSE	0.11811	64	0	4	60	C	frameshift_variant	HIGH	sfxn-1.4	WBGene00008137	transcript	C47D12.3a	protein_coding
II	11682294	GA	[GAA, G]	{G, GAA, GA}	0.2	1	FALSE	TRUE	FALSE	0.322481	65	0	13	52	G	frameshift_variant	HIGH	C47D12.4	WBGene00008138	transcript	C47D12.4	protein_coding
II	11682330	GA	[G, GAA]	{G, GA}	0.0461538	1	FALSE	TRUE	FALSE	0.0887299	65	0	3	62	G	frameshift_variant	HIGH	C47D12.4	WBGene00008138	transcript	C47D12.4	protein_coding
II	11682513	AG	[A]	{AG, A}	0.0153846	1	FALSE	TRUE	FALSE	0.0305307	65	0	1	64	A	frameshift_variant	HIGH	C47D12.4	WBGene00008138	transcript	C47D12.4	protein_coding
II	11714013	CA	[CAA, C]	{C, CAA, CA}	0.030303	1	FALSE	TRUE	FALSE	0.0592181	66	0	2	64	C	frameshift_variant&start_lost	HIGH	F13D12.10	WBGene00008744	transcript	F13D12.10a	protein_coding
II	11715343	G	[C]	{C, G}	0.106061	1	TRUE	FALSE	FALSE	0.191071	66	0	7	59	C	start_lost	HIGH	F13D12.10	WBGene00008744	transcript	F13D12.10b	protein_coding
II	11764530	C	[T]	{C, T}	0.106061	1	TRUE	FALSE	TRUE	0.191071	66	0	7	59	T	splice_donor_variant&intron_variant	HIGH	F44E5.3	WBGene00009690	transcript	F44E5.3	protein_coding
II	11765072	ATGGCATATAG	[A]	{ATGGCATATAG, A}	0.143939	1	FALSE	TRUE	FALSE	0.248323	66	3	8	55	A	frameshift_variant	HIGH	F44E5.3	WBGene00009690	transcript	F44E5.3	protein_coding
II	11766965	A	[G]	{G, A}	0.0169492	1	TRUE	FALSE	TRUE	0.0336086	59	0	1	58	G	splice_acceptor_variant&intron_variant	HIGH	F44E5.2	WBGene00009689	transcript	F44E5.2	protein_coding
II	11767360	C	[A]	{C, A}	0.0338983	1	TRUE	FALSE	FALSE	0.0660582	59	0	2	57	A	stop_gained	HIGH	F44E5.2	WBGene00009689	transcript	F44E5.2	protein_coding
II	11768062	CG	[C]	{C, CG}	0.0166667	1	FALSE	TRUE	FALSE	0.0330532	60	0	1	59	C	frameshift_variant	HIGH	F44E5.2	WBGene00009689	transcript	F44E5.2	protein_coding
II	11768300	C	[CGGGTG]	{C, CGGGTG}	0.0166667	1	FALSE	TRUE	FALSE	0.0330532	60	0	1	59	CGGGTG	frameshift_variant	HIGH	F44E5.2	WBGene00009689	transcript	F44E5.2	protein_coding
II	11768602	T	[TG]	{TG, T}	0.0166667	1	FALSE	TRUE	FALSE	0.0330532	60	0	1	59	TG	frameshift_variant	HIGH	F44E5.2	WBGene00009689	transcript	F44E5.2	protein_coding
II	11768603	G	[A]	{G, A}	0.0166667	1	TRUE	FALSE	TRUE	0.0330532	60	0	1	59	A	stop_gained	HIGH	F44E5.2	WBGene00009689	transcript	F44E5.2	protein_coding
II	11768616	T	[TA]	{TA, T}	0.0172414	1	FALSE	TRUE	FALSE	0.0341829	58	0	1	57	TA	frameshift_variant	HIGH	F44E5.2	WBGene00009689	transcript	F44E5.2	protein_coding
II	11773675	C	[CA]	{C, CA}	0.0151515	1	FALSE	TRUE	FALSE	0.0300717	66	0	1	65	CA	frameshift_variant	HIGH	F44E5.15	WBGene00206377	transcript	F44E5.15	protein_coding
II	11773999	T	[A]	{A, T}	0.272727	1	TRUE	FALSE	FALSE	0.399722	66	0	18	48	A	stop_gained	HIGH	F44E5.15	WBGene00206377	transcript	F44E5.15	protein_coding
II	11776212	CT	[C]	{CT, C}	0.0151515	1	FALSE	TRUE	FALSE	0.0300717	66	0	1	65	C	splice_acceptor_variant&intron_variant	HIGH	patr-1	WBGene00009661	transcript	F43G6.9	protein_coding
II	11802346	GC	[G]	{G, GC}	0.0606061	1	FALSE	TRUE	FALSE	0.114735	66	0	4	62	G	frameshift_variant	HIGH	hda-5	WBGene00009663	transcript	F43G6.11	protein_coding
II	11806941	TG	[T]	{TG, T}	0.166667	1	FALSE	TRUE	FALSE	0.279898	66	0	11	55	T	frameshift_variant	HIGH	jmjd-1.1	WBGene00005013	transcript	F43G6.6	protein_coding
II	11807493	G	[T]	{G, T}	0.0606061	1	TRUE	FALSE	FALSE	0.114735	66	0	4	62	T	stop_gained	HIGH	jmjd-1.1	WBGene00005013	transcript	F43G6.6	protein_coding
II	11807737	CT	[C]	{CT, C}	0.0151515	1	FALSE	TRUE	FALSE	0.0300717	66	0	1	65	C	frameshift_variant	HIGH	jmjd-1.1	WBGene00005013	transcript	F43G6.6	protein_coding
II	11808420	G	[A]	{G, A}	0.166667	1	TRUE	FALSE	TRUE	0.279898	66	0	11	55	A	stop_gained	HIGH	jmjd-1.1	WBGene00005013	transcript	F43G6.6	protein_coding
II	11808710	GT	[G]	{G, GT}	0.0606061	1	FALSE	TRUE	FALSE	0.114735	66	0	4	62	G	splice_donor_variant&intron_variant	HIGH	jmjd-1.1	WBGene00005013	transcript	F43G6.6	protein_coding
II	11829959	GAGGGC	[G]	{G, GAGGGC}	0.0151515	1	FALSE	TRUE	FALSE	0.0300717	66	0	1	65	G	frameshift_variant	HIGH	pes-5	WBGene00003979	transcript	T27D12.4a	protein_coding
II	11831269	T	[G]	{G, T}	0.227273	1	TRUE	FALSE	FALSE	0.353921	66	0	15	51	G	stop_lost	HIGH	clec-144	WBGene00012086	transcript	T27D12.3	protein_coding
II	11865668	AT	[A]	{AT, A}	0.0151515	1	FALSE	TRUE	FALSE	0.0300717	66	0	1	65	A	splice_donor_variant&intron_variant	HIGH	npp-3	WBGene00003789	transcript	K12D12.2.1	protein_coding
II	11875201	G	[GGCT, GGCA, GGCC, GGC]	{G, GGCC, GGCT}	0.0327869	1	FALSE	TRUE	FALSE	0.063948	61	0	2	59	GGC	frameshift_variant	HIGH	top-2	WBGene00010785	transcript	K12D12.1	protein_coding
II	11882626	G	[T]	{G, T}	0.0153846	1	TRUE	FALSE	FALSE	0.0305307	65	0	1	64	T	stop_gained	HIGH	ZK930.5	WBGene00014155	transcript	ZK930.5	protein_coding
II	11885779	AG	[A]	{AG, A}	0.0185185	1	FALSE	TRUE	FALSE	0.0366909	54	0	1	53	A	frameshift_variant	HIGH	ZK930.6	WBGene00014156	transcript	ZK930.6	protein_coding
II	11885789	T	[TA]	{TA, T}	0.102564	1	FALSE	TRUE	FALSE	0.18648	39	0	4	35	TA	frameshift_variant	HIGH	ZK930.6	WBGene00014156	transcript	ZK930.6	protein_coding
II	11886101	GA	[G]	{G, GA}	0.046875	1	FALSE	TRUE	FALSE	0.0900591	64	0	3	61	G	frameshift_variant	HIGH	ZK930.6	WBGene00014156	transcript	ZK930.6	protein_coding
II	11898095	C	[A]	{C, A}	0.0151515	1	TRUE	FALSE	FALSE	0.0300717	66	0	1	65	A	stop_lost&splice_region_variant	HIGH	vab-23	WBGene00014153	transcript	ZK930.3b	protein_coding
II	11914673	A	[G]	{G, A}	0.523077	1	TRUE	FALSE	TRUE	0.502803	65	0	34	31	G	splice_acceptor_variant&intron_variant	HIGH	ZK930.7	WBGene00014157	transcript	ZK930.7	protein_coding
II	11970328	CAGT	[CAGCAGTAGT, C, CAGCAGCAGTAGT]	{CAGCAGTAGT, CAGCAGCAGTAGT, CAGT}	0.030303	1	FALSE	TRUE	FALSE	0.0592181	66	0	2	64	CAGCAGCAGTAGT	stop_gained&conservative_inframe_insertion	HIGH	mex-1	WBGene00003228	transcript	W03C9.7a.1	protein_coding
II	11983413	G	[T, C, A]	{C, G, T}	0.0454545	1	TRUE	FALSE	FALSE	0.0874393	66	0	3	63	A	splice_acceptor_variant&intron_variant	HIGH	ash-2	WBGene00012458	transcript	Y17G7B.2c	lincRNA
II	11988424	A	[T]	{A, T}	0.0151515	1	TRUE	FALSE	FALSE	0.0300717	66	0	1	65	T	stop_gained	HIGH	ash-2	WBGene00012458	transcript	Y17G7B.2d	protein_coding
II	11999334	G	[A]	{G, A}	0.0151515	1	TRUE	FALSE	TRUE	0.0300717	66	0	1	65	A	stop_gained	HIGH	Y17G7B.23	WBGene00044030	transcript	Y17G7B.23a	protein_coding

## Sheet: Moderate
CHROM	POS	REF	ALT	allele_set	aaf	call_rate	is_snp	is_indel	is_transition	nucl_diversity	num_called	num_het	num_hom_alt	num_hom_ref	ANN	Mutation type	Impact	Gene name	WBGene ID	Transcript?	Gene ID	Gene Type
II	11534423	C	[T]	{C, T}	0.0909091	1	TRUE	FALSE	TRUE	0.166551	66	0	6	60	T	missense_variant	MODERATE	Y62F5A.12	WBGene00077453	transcript	Y62F5A.12	protein_coding
II	11534444	C	[T]	{C, T}	0.19697	1	TRUE	FALSE	TRUE	0.31876	66	0	13	53	T	missense_variant	MODERATE	Y62F5A.12	WBGene00077453	transcript	Y62F5A.12	protein_coding
II	11538488	G	[T]	{G, T}	0.0757576	1	TRUE	FALSE	FALSE	0.141106	66	0	5	61	T	missense_variant	MODERATE	Y62F5A.9	WBGene00013387	transcript	Y62F5A.9	protein_coding
II	11538508	T	[A]	{A, T}	0.0151515	1	TRUE	FALSE	FALSE	0.0300717	66	0	1	65	A	missense_variant	MODERATE	Y62F5A.9	WBGene00013387	transcript	Y62F5A.9	protein_coding
II	11538721	C	[A]	{C, A}	0.0151515	1	TRUE	FALSE	FALSE	0.0300717	66	0	1	65	A	missense_variant	MODERATE	Y62F5A.9	WBGene00013387	transcript	Y62F5A.9	protein_coding
II	11538744	C	[T]	{C, T}	0.166667	1	TRUE	FALSE	TRUE	0.279898	66	0	11	55	T	missense_variant	MODERATE	Y62F5A.9	WBGene00013387	transcript	Y62F5A.9	protein_coding
II	11538771	G	[A]	{G, A}	0.363636	1	TRUE	FALSE	TRUE	0.466343	66	0	24	42	A	missense_variant	MODERATE	Y62F5A.9	WBGene00013387	transcript	Y62F5A.9	protein_coding
II	11539149	G	[A]	{G, A}	0.0151515	1	TRUE	FALSE	TRUE	0.0300717	66	0	1	65	A	missense_variant	MODERATE	F54D5.12	WBGene00010055	transcript	F54D5.12	protein_coding
II	11539534	T	[C]	{C, T}	0.166667	1	TRUE	FALSE	TRUE	0.279898	66	0	11	55	C	missense_variant	MODERATE	F54D5.12	WBGene00010055	transcript	F54D5.12	protein_coding
II	11539558	G	[A]	{G, A}	0.0151515	1	TRUE	FALSE	TRUE	0.0300717	66	0	1	65	A	missense_variant	MODERATE	F54D5.12	WBGene00010055	transcript	F54D5.12	protein_coding
II	11539676	G	[A]	{G, A}	0.166667	1	TRUE	FALSE	TRUE	0.279898	66	0	11	55	A	missense_variant	MODERATE	F54D5.12	WBGene00010055	transcript	F54D5.12	protein_coding
II	11539914	T	[C]	{C, T}	0.030303	1	TRUE	FALSE	TRUE	0.0592181	66	0	2	64	C	missense_variant	MODERATE	F54D5.12	WBGene00010055	transcript	F54D5.12	protein_coding
II	11539947	A	[G]	{G, A}	0.0151515	1	TRUE	FALSE	TRUE	0.0300717	66	0	1	65	G	missense_variant	MODERATE	F54D5.12	WBGene00010055	transcript	F54D5.12	protein_coding
II	11539966	G	[A]	{G, A}	0.0151515	1	TRUE	FALSE	TRUE	0.0300717	66	0	1	65	A	missense_variant	MODERATE	F54D5.12	WBGene00010055	transcript	F54D5.12	protein_coding
II	11540172	G	[T]	{G, T}	0.0454545	1	TRUE	FALSE	FALSE	0.0874393	66	0	3	63	T	missense_variant	MODERATE	F54D5.12	WBGene00010055	transcript	F54D5.12	protein_coding
II	11542420	T	[C]	{C, T}	0.0151515	1	TRUE	FALSE	TRUE	0.0300717	66	0	1	65	C	missense_variant	MODERATE	F54D5.11	WBGene00010054	transcript	F54D5.11.1	protein_coding
II	11543544	T	[G]	{G, T}	0.0461538	1	TRUE	FALSE	FALSE	0.0887299	65	0	3	62	G	missense_variant	MODERATE	F54D5.9	WBGene00010053	transcript	F54D5.9	protein_coding
II	11544086	C	[G]	{C, G}	0.0606061	1	TRUE	FALSE	FALSE	0.114735	66	0	4	62	G	missense_variant	MODERATE	F54D5.9	WBGene00010053	transcript	F54D5.9	protein_coding
II	11544533	G	[A]	{G, A}	0.0151515	1	TRUE	FALSE	TRUE	0.0300717	66	0	1	65	A	missense_variant	MODERATE	F54D5.9	WBGene00010053	transcript	F54D5.9	protein_coding
II	11544718	A	[T]	{A, T}	0.0151515	1	TRUE	FALSE	FALSE	0.0300717	66	0	1	65	T	missense_variant	MODERATE	F54D5.9	WBGene00010053	transcript	F54D5.9	protein_coding
II	11546379	G	[A, C]	{C, G, A}	0.0909091	1	TRUE	FALSE	FALSE	0.166551	66	0	6	60	A	missense_variant	MODERATE	dnj-13	WBGene00001031	transcript	F54D5.8.1	protein_coding
II	11548389	G	[A]	{G, A}	0.166667	1	TRUE	FALSE	TRUE	0.279898	66	0	11	55	A	missense_variant	MODERATE	F54D5.7	WBGene00010052	transcript	F54D5.7.1	protein_coding
II	11548912	G	[T]	{G, T}	0.0757576	1	TRUE	FALSE	FALSE	0.141106	66	0	5	61	T	missense_variant	MODERATE	F54D5.7	WBGene00010052	transcript	F54D5.7.1	protein_coding
II	11548960	A	[T]	{A, T}	0.0151515	1	TRUE	FALSE	FALSE	0.0300717	66	0	1	65	T	missense_variant	MODERATE	F54D5.7	WBGene00010052	transcript	F54D5.7.1	protein_coding
II	11556993	A	[T]	{A, T}	0.0151515	1	TRUE	FALSE	FALSE	0.0300717	66	0	1	65	T	missense_variant	MODERATE	F54D5.17	WBGene00195146	transcript	F54D5.17	protein_coding
II	11558034	A	[T]	{A, T}	0.0757576	1	TRUE	FALSE	FALSE	0.141106	66	0	5	61	T	missense_variant	MODERATE	WBGene00271798	WBGene00271798	transcript	F54D5.24	protein_coding
II	11558162	T	[A]	{A, T}	0.0151515	1	TRUE	FALSE	FALSE	0.0300717	66	0	1	65	A	missense_variant	MODERATE	WBGene00271798	WBGene00271798	transcript	F54D5.24	protein_coding
II	11558173	C	[G]	{C, G}	0.030303	1	TRUE	FALSE	FALSE	0.0592181	66	0	2	64	G	missense_variant	MODERATE	WBGene00271798	WBGene00271798	transcript	F54D5.24	protein_coding
II	11558266	A	[G]	{G, A}	0.015625	1	TRUE	FALSE	TRUE	0.0310039	64	0	1	63	G	missense_variant	MODERATE	WBGene00271798	WBGene00271798	transcript	F54D5.24	protein_coding
II	11558894	G	[A]	{G, A}	0.166667	1	TRUE	FALSE	TRUE	0.279898	66	0	11	55	A	missense_variant	MODERATE	F54D5.15	WBGene00010057	transcript	F54D5.15a	protein_coding
II	11560258	C	[A]	{C, A}	0.166667	1	TRUE	FALSE	FALSE	0.279898	66	0	11	55	A	missense_variant	MODERATE	F54D5.15	WBGene00010057	transcript	F54D5.15a	protein_coding
II	11563292	T	[A]	{A, T}	0.0461538	1	TRUE	FALSE	FALSE	0.0887299	65	0	3	62	A	missense_variant	MODERATE	F54D5.15	WBGene00010057	transcript	F54D5.15a	protein_coding
II	11563303	T	[A]	{A, T}	0.0153846	1	TRUE	FALSE	FALSE	0.0305307	65	0	1	64	A	missense_variant	MODERATE	F54D5.15	WBGene00010057	transcript	F54D5.15a	protein_coding
II	11563333	C	[G]	{C, G}	0.0153846	1	TRUE	FALSE	FALSE	0.0305307	65	0	1	64	G	missense_variant	MODERATE	F54D5.15	WBGene00010057	transcript	F54D5.15a	protein_coding
II	11563336	G	[T]	{G, T}	0.0153846	1	TRUE	FALSE	FALSE	0.0305307	65	0	1	64	T	missense_variant	MODERATE	F54D5.15	WBGene00010057	transcript	F54D5.15a	protein_coding
II	11566198	G	[C]	{C, G}	0.893939	1	TRUE	FALSE	FALSE	0.191071	66	0	59	7	C	missense_variant	MODERATE	F54D5.5	WBGene00010051	transcript	F54D5.5b	protein_coding
II	11568984	T	[C]	{C, T}	0.0757576	1	TRUE	FALSE	TRUE	0.141106	66	0	5	61	C	missense_variant	MODERATE	F54D5.23	WBGene00219434	transcript	F54D5.23	protein_coding
II	11568998	G	[A]	{G, A}	0.0151515	1	TRUE	FALSE	TRUE	0.0300717	66	0	1	65	A	missense_variant	MODERATE	F54D5.23	WBGene00219434	transcript	F54D5.23	protein_coding
II	11569191	C	[A]	{C, A}	0.0151515	1	TRUE	FALSE	FALSE	0.0300717	66	0	1	65	A	missense_variant	MODERATE	F54D5.23	WBGene00219434	transcript	F54D5.23	protein_coding
II	11569849	T	[C]	{C, T}	0.166667	1	TRUE	FALSE	TRUE	0.279898	66	0	11	55	C	missense_variant	MODERATE	F54D5.4	WBGene00010050	transcript	F54D5.4	protein_coding
II	11569862	A	[G]	{G, A}	0.0151515	1	TRUE	FALSE	TRUE	0.0300717	66	0	1	65	G	missense_variant	MODERATE	F54D5.4	WBGene00010050	transcript	F54D5.4	protein_coding
II	11570373	C	[G]	{C, G}	0.136364	1	TRUE	FALSE	FALSE	0.237335	66	0	9	57	G	missense_variant	MODERATE	F54D5.4	WBGene00010050	transcript	F54D5.4	protein_coding
II	11570869	G	[A]	{G, A}	0.0606061	1	TRUE	FALSE	TRUE	0.114735	66	0	4	62	A	missense_variant	MODERATE	F54D5.4	WBGene00010050	transcript	F54D5.4	protein_coding
II	11570915	A	[G]	{G, A}	0.030303	1	TRUE	FALSE	TRUE	0.0592181	66	0	2	64	G	missense_variant	MODERATE	F54D5.4	WBGene00010050	transcript	F54D5.4	protein_coding
II	11571854	G	[A]	{G, A}	0.0757576	1	TRUE	FALSE	TRUE	0.141106	66	0	5	61	A	missense_variant	MODERATE	F54D5.3	WBGene00010049	transcript	F54D5.3	protein_coding
II	11572682	C	[T]	{C, T}	0.30303	1	TRUE	FALSE	TRUE	0.42563	66	0	20	46	T	missense_variant	MODERATE	F54D5.3	WBGene00010049	transcript	F54D5.3	protein_coding
II	11572801	A	[G]	{G, A}	0.0151515	1	TRUE	FALSE	TRUE	0.0300717	66	0	1	65	G	missense_variant	MODERATE	F54D5.3	WBGene00010049	transcript	F54D5.3	protein_coding
II	11573681	A	[T]	{A, T}	0.0153846	1	TRUE	FALSE	FALSE	0.0305307	65	0	1	64	T	missense_variant	MODERATE	F54D5.2	WBGene00010048	transcript	F54D5.2	protein_coding
II	11573720	T	[C]	{C, T}	0.0461538	1	TRUE	FALSE	TRUE	0.0887299	65	0	3	62	C	missense_variant	MODERATE	F54D5.2	WBGene00010048	transcript	F54D5.2	protein_coding
II	11573732	T	[C]	{C, T}	0.0153846	1	TRUE	FALSE	TRUE	0.0305307	65	0	1	64	C	missense_variant	MODERATE	F54D5.2	WBGene00010048	transcript	F54D5.2	protein_coding
II	11574891	A	[C]	{C, A}	0.015625	1	TRUE	FALSE	FALSE	0.0310039	64	0	1	63	C	missense_variant	MODERATE	F54D5.2	WBGene00010048	transcript	F54D5.2	protein_coding
II	11576021	G	[T]	{G, T}	0.0454545	1	TRUE	FALSE	FALSE	0.0874393	66	0	3	63	T	missense_variant	MODERATE	pcs-1	WBGene00003960	transcript	F54D5.1a	protein_coding
II	11579706	T	[C]	{C, T}	0.0909091	1	TRUE	FALSE	TRUE	0.166551	66	0	6	60	C	missense_variant	MODERATE	smc-6	WBGene00010056	transcript	F54D5.14	protein_coding
II	11579788	C	[T]	{C, T}	0.0454545	1	TRUE	FALSE	TRUE	0.0874393	66	0	3	63	T	missense_variant	MODERATE	smc-6	WBGene00010056	transcript	F54D5.14	protein_coding
II	11579932	A	[G]	{G, A}	0.0757576	1	TRUE	FALSE	TRUE	0.141106	66	0	5	61	G	missense_variant	MODERATE	smc-6	WBGene00010056	transcript	F54D5.14	protein_coding
II	11580157	G	[A]	{G, A}	0.0151515	1	TRUE	FALSE	TRUE	0.0300717	66	0	1	65	A	missense_variant	MODERATE	smc-6	WBGene00010056	transcript	F54D5.14	protein_coding
II	11580178	A	[G]	{G, A}	0.0151515	1	TRUE	FALSE	TRUE	0.0300717	66	0	1	65	G	missense_variant	MODERATE	smc-6	WBGene00010056	transcript	F54D5.14	protein_coding
II	11580566	T	[C]	{C, T}	0.893939	1	TRUE	FALSE	TRUE	0.191071	66	0	59	7	C	missense_variant	MODERATE	smc-6	WBGene00010056	transcript	F54D5.14	protein_coding
II	11580728	C	[A]	{C, A}	0.0151515	1	TRUE	FALSE	FALSE	0.0300717	66	0	1	65	A	missense_variant	MODERATE	smc-6	WBGene00010056	transcript	F54D5.14	protein_coding
II	11581059	C	[T]	{C, T}	0.0151515	1	TRUE	FALSE	TRUE	0.0300717	66	0	1	65	T	missense_variant	MODERATE	smc-6	WBGene00010056	transcript	F54D5.14	protein_coding
II	11581591	G	[A]	{G, A}	0.030303	1	TRUE	FALSE	TRUE	0.0592181	66	0	2	64	A	missense_variant	MODERATE	smc-6	WBGene00010056	transcript	F54D5.14	protein_coding
II	11582103	G	[T]	{G, T}	0.0151515	1	TRUE	FALSE	FALSE	0.0300717	66	0	1	65	T	missense_variant	MODERATE	smc-6	WBGene00010056	transcript	F54D5.14	protein_coding
II	11582201	G	[A]	{G, A}	0.0151515	1	TRUE	FALSE	TRUE	0.0300717	66	0	1	65	A	missense_variant	MODERATE	smc-6	WBGene00010056	transcript	F54D5.14	protein_coding
II	11583470	C	[T]	{C, T}	0.0151515	1	TRUE	FALSE	TRUE	0.0300717	66	0	1	65	T	missense_variant	MODERATE	D1043.1	WBGene00008361	transcript	D1043.1	protein_coding
II	11585017	C	[T]	{C, T}	0.0151515	1	TRUE	FALSE	TRUE	0.0300717	66	0	1	65	T	missense_variant	MODERATE	D1043.1	WBGene00008361	transcript	D1043.1	protein_coding
II	11585250	T	[A]	{A, T}	0.0151515	1	TRUE	FALSE	FALSE	0.0300717	66	0	1	65	A	missense_variant	MODERATE	D1043.1	WBGene00008361	transcript	D1043.1	protein_coding
II	11585280	A	[G]	{G, A}	0.166667	1	TRUE	FALSE	TRUE	0.279898	66	0	11	55	G	missense_variant	MODERATE	D1043.1	WBGene00008361	transcript	D1043.1	protein_coding
II	11585679	A	[G]	{G, A}	0.0151515	1	TRUE	FALSE	TRUE	0.0300717	66	0	1	65	G	missense_variant	MODERATE	D1043.1	WBGene00008361	transcript	D1043.1	protein_coding
II	11585967	G	[A]	{G, A}	0.0757576	1	TRUE	FALSE	TRUE	0.141106	66	0	5	61	A	missense_variant	MODERATE	D1043.1	WBGene00008361	transcript	D1043.1	protein_coding
II	11588588	T	[G]	{G, T}	0.0151515	1	TRUE	FALSE	FALSE	0.0300717	66	0	1	65	G	missense_variant	MODERATE	F07A11.1	WBGene00008545	transcript	F07A11.1	protein_coding
II	11588734	TAGC	[T]	{TAGC, T}	0.0151515	1	FALSE	TRUE	FALSE	0.0300717	66	0	1	65	T	conservative_inframe_deletion	MODERATE	F07A11.1	WBGene00008545	transcript	F07A11.1	protein_coding
II	11588850	A	[C]	{C, A}	0.0151515	1	TRUE	FALSE	FALSE	0.0300717	66	0	1	65	C	missense_variant	MODERATE	F07A11.1	WBGene00008545	transcript	F07A11.1	protein_coding
II	11589306	G	[T]	{G, T}	0.166667	1	TRUE	FALSE	FALSE	0.279898	66	0	11	55	T	missense_variant	MODERATE	F07A11.1	WBGene00008545	transcript	F07A11.1	protein_coding
II	11590180	C	[T]	{C, T}	0.0151515	1	TRUE	FALSE	TRUE	0.0300717	66	0	1	65	T	missense_variant	MODERATE	F07A11.1	WBGene00008545	transcript	F07A11.1	protein_coding
II	11590297	C	[A]	{C, A}	0.0151515	1	TRUE	FALSE	FALSE	0.0300717	66	0	1	65	A	missense_variant	MODERATE	F07A11.1	WBGene00008545	transcript	F07A11.1	protein_coding
II	11590327	C	[T]	{C, T}	0.0151515	1	TRUE	FALSE	TRUE	0.0300717	66	0	1	65	T	missense_variant	MODERATE	F07A11.1	WBGene00008545	transcript	F07A11.1	protein_coding
II	11590418	G	[A]	{G, A}	0.0151515	1	TRUE	FALSE	TRUE	0.0300717	66	0	1	65	A	missense_variant	MODERATE	F07A11.1	WBGene00008545	transcript	F07A11.1	protein_coding
II	11590790	T	[C]	{C, T}	0.893939	1	TRUE	FALSE	TRUE	0.191071	66	0	59	7	C	missense_variant	MODERATE	F07A11.1	WBGene00008545	transcript	F07A11.1	protein_coding
II	11590848	A	[T]	{A, T}	0.0151515	1	TRUE	FALSE	FALSE	0.0300717	66	0	1	65	T	missense_variant	MODERATE	F07A11.1	WBGene00008545	transcript	F07A11.1	protein_coding
II	11590852	TTCG	[T]	{TTCG, T}	0.0151515	1	FALSE	TRUE	FALSE	0.0300717	66	0	1	65	T	disruptive_inframe_deletion	MODERATE	F07A11.1	WBGene00008545	transcript	F07A11.1	protein_coding
II	11590858	T	[A]	{A, T}	0.0151515	1	TRUE	FALSE	FALSE	0.0300717	66	0	1	65	A	missense_variant	MODERATE	F07A11.1	WBGene00008545	transcript	F07A11.1	protein_coding
II	11590900	G	[T]	{G, T}	0.0151515	1	TRUE	FALSE	FALSE	0.0300717	66	0	1	65	T	missense_variant	MODERATE	F07A11.1	WBGene00008545	transcript	F07A11.1	protein_coding
II	11590923	C	[T]	{C, T}	0.0757576	1	TRUE	FALSE	TRUE	0.141106	66	0	5	61	T	missense_variant	MODERATE	F07A11.1	WBGene00008545	transcript	F07A11.1	protein_coding
II	11591312	C	[A]	{C, A}	0.0757576	1	TRUE	FALSE	FALSE	0.141106	66	0	5	61	A	missense_variant	MODERATE	F07A11.1	WBGene00008545	transcript	F07A11.1	protein_coding
II	11591362	G	[A]	{G, A}	0.0757576	1	TRUE	FALSE	TRUE	0.141106	66	0	5	61	A	missense_variant	MODERATE	F07A11.1	WBGene00008545	transcript	F07A11.1	protein_coding
II	11593165	C	[T]	{C, T}	0.454545	1	TRUE	FALSE	TRUE	0.499653	66	0	30	36	T	missense_variant	MODERATE	gfat-1	WBGene00008546	transcript	F07A11.2a.1	protein_coding
II	11593998	G	[C]	{C, G}	0.0151515	1	TRUE	FALSE	FALSE	0.0300717	66	0	1	65	C	missense_variant	MODERATE	gfat-1	WBGene00008546	transcript	F07A11.2a.1	protein_coding
II	11596990	G	[T]	{G, T}	0.0757576	1	TRUE	FALSE	FALSE	0.141106	66	0	5	61	T	missense_variant	MODERATE	npp-5	WBGene00003791	transcript	F07A11.3	protein_coding
II	11597152	G	[C]	{C, G}	0.0151515	1	TRUE	FALSE	FALSE	0.0300717	66	0	1	65	C	missense_variant	MODERATE	npp-5	WBGene00003791	transcript	F07A11.3	protein_coding
II	11597481	G	[A]	{G, A}	0.0153846	1	TRUE	FALSE	TRUE	0.0305307	65	0	1	64	A	missense_variant	MODERATE	npp-5	WBGene00003791	transcript	F07A11.3	protein_coding
II	11597785	C	[T]	{C, T}	0.015625	1	TRUE	FALSE	TRUE	0.0310039	64	0	1	63	T	missense_variant	MODERATE	npp-5	WBGene00003791	transcript	F07A11.3	protein_coding
II	11598099	T	[C]	{C, T}	0.015625	1	TRUE	FALSE	TRUE	0.0310039	64	0	1	63	C	missense_variant	MODERATE	npp-5	WBGene00003791	transcript	F07A11.3	protein_coding
II	11598236	C	[G]	{C, G}	0.078125	1	TRUE	FALSE	FALSE	0.145177	64	0	5	59	G	missense_variant	MODERATE	npp-5	WBGene00003791	transcript	F07A11.3	protein_coding
II	11598293	T	[C]	{C, T}	0.0923077	1	TRUE	FALSE	TRUE	0.168873	65	0	6	59	C	missense_variant	MODERATE	npp-5	WBGene00003791	transcript	F07A11.3	protein_coding
II	11598542	G	[T]	{G, T}	0.0153846	1	TRUE	FALSE	FALSE	0.0305307	65	0	1	64	T	missense_variant	MODERATE	npp-5	WBGene00003791	transcript	F07A11.3	protein_coding
II	11599424	G	[A]	{G, A}	0.893939	1	TRUE	FALSE	TRUE	0.191071	66	0	59	7	A	missense_variant	MODERATE	npp-5	WBGene00003791	transcript	F07A11.3	protein_coding
II	11599425	C	[A]	{C, A}	0.0151515	1	TRUE	FALSE	FALSE	0.0300717	66	0	1	65	A	missense_variant	MODERATE	npp-5	WBGene00003791	transcript	F07A11.3	protein_coding
II	11606089	T	[C]	{C, T}	0.348485	1	TRUE	FALSE	TRUE	0.457553	66	0	23	43	C	missense_variant	MODERATE	F07A11.4	WBGene00008547	transcript	F07A11.4a	protein_coding
II	11606098	A	[ACAG]	{ACAG, A}	0.0833333	1	FALSE	TRUE	FALSE	0.153944	66	1	5	60	ACAG	disruptive_inframe_insertion	MODERATE	F07A11.4	WBGene00008547	transcript	F07A11.4a	protein_coding
II	11606099	C	[CAGA]	{C, CAGA}	0.0153846	1	FALSE	TRUE	FALSE	0.0305307	65	0	1	64	CAGA	disruptive_inframe_insertion	MODERATE	F07A11.4	WBGene00008547	transcript	F07A11.4a	protein_coding
II	11606100	A	[AGCC, AGCT]	{AGCC, A}	0.030303	1	FALSE	TRUE	FALSE	0.0592181	66	0	2	64	AGCC	disruptive_inframe_insertion	MODERATE	F07A11.4	WBGene00008547	transcript	F07A11.4a	protein_coding
II	11606170	G	[T]	{G, T}	0.151515	1	TRUE	FALSE	FALSE	0.259079	66	0	10	56	T	missense_variant	MODERATE	F07A11.4	WBGene00008547	transcript	F07A11.4a	protein_coding
II	11606181	A	[G]	{G, A}	0.151515	1	TRUE	FALSE	TRUE	0.259079	66	0	10	56	G	missense_variant	MODERATE	F07A11.4	WBGene00008547	transcript	F07A11.4a	protein_coding
II	11606188	G	[C]	{C, G}	0.0151515	1	TRUE	FALSE	FALSE	0.0300717	66	0	1	65	C	missense_variant	MODERATE	F07A11.4	WBGene00008547	transcript	F07A11.4a	protein_coding
II	11606193	T	[C]	{C, T}	0.181818	1	TRUE	FALSE	TRUE	0.299792	66	0	12	54	C	missense_variant	MODERATE	F07A11.4	WBGene00008547	transcript	F07A11.4a	protein_coding
II	11606266	A	[T]	{A, T}	0.0151515	1	TRUE	FALSE	FALSE	0.0300717	66	0	1	65	T	missense_variant	MODERATE	F07A11.4	WBGene00008547	transcript	F07A11.4a	protein_coding
II	11607105	A	[C]	{C, A}	0.166667	1	TRUE	FALSE	FALSE	0.279898	66	0	11	55	C	missense_variant	MODERATE	F07A11.4	WBGene00008547	transcript	F07A11.4a	protein_coding
II	11607109	GGTACTC	[G]	{G, GGTACTC}	0.030303	1	FALSE	TRUE	FALSE	0.0592181	66	0	2	64	G	disruptive_inframe_deletion	MODERATE	F07A11.4	WBGene00008547	transcript	F07A11.4a	protein_coding
II	11607110	GTACTCA	[G]	{GTACTCA, G}	0.166667	1	FALSE	TRUE	FALSE	0.279898	66	0	11	55	G	disruptive_inframe_deletion	MODERATE	F07A11.4	WBGene00008547	transcript	F07A11.4a	protein_coding
II	11608802	T	[C]	{C, T}	0.0151515	1	TRUE	FALSE	TRUE	0.0300717	66	0	1	65	C	missense_variant	MODERATE	F07A11.4	WBGene00008547	transcript	F07A11.4a	protein_coding
II	11608891	G	[A]	{G, A}	0.0151515	1	TRUE	FALSE	TRUE	0.0300717	66	0	1	65	A	missense_variant	MODERATE	F07A11.4	WBGene00008547	transcript	F07A11.4a	protein_coding
II	11609374	A	[G]	{G, A}	0.893939	1	TRUE	FALSE	TRUE	0.191071	66	0	59	7	G	missense_variant	MODERATE	F07A11.4	WBGene00008547	transcript	F07A11.4b	protein_coding
II	11609507	A	[G]	{G, A}	0.166667	1	TRUE	FALSE	TRUE	0.279898	66	0	11	55	G	missense_variant	MODERATE	F07A11.4	WBGene00008547	transcript	F07A11.4a	protein_coding
II	11609517	G	[T]	{G, T}	0.0151515	1	TRUE	FALSE	FALSE	0.0300717	66	0	1	65	T	missense_variant	MODERATE	F07A11.4	WBGene00008547	transcript	F07A11.4a	protein_coding
II	11609631	C	[G]	{C, G}	0.106061	1	TRUE	FALSE	FALSE	0.191071	66	0	7	59	G	missense_variant	MODERATE	F07A11.4	WBGene00008547	transcript	F07A11.4a	protein_coding
II	11609905	A	[G]	{G, A}	0.106061	1	TRUE	FALSE	TRUE	0.191071	66	0	7	59	G	missense_variant	MODERATE	F07A11.4	WBGene00008547	transcript	F07A11.4a	protein_coding
II	11612592	G	[A]	{G, A}	0.0151515	1	TRUE	FALSE	TRUE	0.0300717	66	0	1	65	A	missense_variant	MODERATE	F07A11.5	WBGene00008548	transcript	F07A11.5	protein_coding
II	11612668	C	[T]	{C, T}	0.0151515	1	TRUE	FALSE	TRUE	0.0300717	66	0	1	65	T	missense_variant	MODERATE	F07A11.5	WBGene00008548	transcript	F07A11.5	protein_coding
II	11612669	G	[T]	{G, T}	0.166667	1	TRUE	FALSE	FALSE	0.279898	66	0	11	55	T	missense_variant	MODERATE	F07A11.5	WBGene00008548	transcript	F07A11.5	protein_coding
II	11612679	G	[C]	{C, G}	0.0606061	1	TRUE	FALSE	FALSE	0.114735	66	0	4	62	C	missense_variant	MODERATE	F07A11.5	WBGene00008548	transcript	F07A11.5	protein_coding
II	11613475	A	[G]	{G, A}	0.0151515	1	TRUE	FALSE	TRUE	0.0300717	66	0	1	65	G	missense_variant	MODERATE	F07A11.5	WBGene00008548	transcript	F07A11.5	protein_coding
II	11613904	G	[A]	{G, A}	0.0151515	1	TRUE	FALSE	TRUE	0.0300717	66	0	1	65	A	missense_variant	MODERATE	F07A11.5	WBGene00008548	transcript	F07A11.5	protein_coding
II	11614199	G	[A]	{G, A}	0.106061	1	TRUE	FALSE	TRUE	0.191071	66	0	7	59	A	missense_variant	MODERATE	F07A11.5	WBGene00008548	transcript	F07A11.5	protein_coding
II	11618563	T	[A]	{A, T}	0.169231	1	TRUE	FALSE	FALSE	0.283363	65	0	11	54	A	missense_variant	MODERATE	din-1	WBGene00008549	transcript	F07A11.6d.2	protein_coding
II	11618566	A	[G]	{G, A}	0.169231	1	TRUE	FALSE	TRUE	0.283363	65	0	11	54	G	missense_variant	MODERATE	din-1	WBGene00008549	transcript	F07A11.6d.2	protein_coding
II	11618653	G	[T]	{G, T}	0.907692	1	TRUE	FALSE	FALSE	0.168873	65	0	59	6	T	missense_variant	MODERATE	din-1	WBGene00008549	transcript	F07A11.6d.2	protein_coding
II	11618807	G	[T]	{G, T}	0.169231	1	TRUE	FALSE	FALSE	0.283363	65	0	11	54	T	missense_variant	MODERATE	din-1	WBGene00008549	transcript	F07A11.6d.2	protein_coding
II	11618888	G	[C]	{C, G}	0.0153846	1	TRUE	FALSE	FALSE	0.0305307	65	0	1	64	C	missense_variant	MODERATE	din-1	WBGene00008549	transcript	F07A11.6d.2	protein_coding
II	11619014	GCTGAGCAGC	[G]	{G, GCTGAGCAGC}	0.0153846	1	FALSE	TRUE	FALSE	0.0305307	65	0	1	64	G	conservative_inframe_deletion	MODERATE	din-1	WBGene00008549	transcript	F07A11.6d.2	protein_coding
II	11619101	C	[T]	{C, T}	0.107692	1	TRUE	FALSE	TRUE	0.193679	65	0	7	58	T	missense_variant	MODERATE	din-1	WBGene00008549	transcript	F07A11.6d.2	protein_coding
II	11621172	G	[A]	{G, A}	0.0153846	1	TRUE	FALSE	TRUE	0.0305307	65	0	1	64	A	missense_variant	MODERATE	din-1	WBGene00008549	transcript	F07A11.6b	protein_coding
II	11622697	T	[C]	{C, T}	0.0153846	1	TRUE	FALSE	TRUE	0.0305307	65	0	1	64	C	missense_variant	MODERATE	din-1	WBGene00008549	transcript	F07A11.6b	protein_coding
II	11622799	T	[G]	{G, T}	0.0923077	1	TRUE	FALSE	FALSE	0.168873	65	0	6	59	G	missense_variant	MODERATE	din-1	WBGene00008549	transcript	F07A11.6b	protein_coding
II	11622916	T	[G]	{G, T}	0.0923077	1	TRUE	FALSE	FALSE	0.168873	65	0	6	59	G	missense_variant	MODERATE	din-1	WBGene00008549	transcript	F07A11.6b	protein_coding
II	11623155	T	[G]	{G, T}	0.0153846	1	TRUE	FALSE	FALSE	0.0305307	65	0	1	64	G	missense_variant	MODERATE	din-1	WBGene00008549	transcript	F07A11.6b	protein_coding
II	11623205	T	[G]	{G, T}	0.0153846	1	TRUE	FALSE	FALSE	0.0305307	65	0	1	64	G	missense_variant	MODERATE	din-1	WBGene00008549	transcript	F07A11.6b	protein_coding
II	11623345	A	[T]	{A, T}	0.0153846	1	TRUE	FALSE	FALSE	0.0305307	65	0	1	64	T	missense_variant	MODERATE	din-1	WBGene00008549	transcript	F07A11.6b	protein_coding
II	11623480	T	[G]	{G, T}	0.338462	1	TRUE	FALSE	FALSE	0.451282	65	0	22	43	G	missense_variant	MODERATE	din-1	WBGene00008549	transcript	F07A11.6b	protein_coding
II	11623979	G	[T]	{G, T}	0.0153846	1	TRUE	FALSE	FALSE	0.0305307	65	0	1	64	T	missense_variant	MODERATE	din-1	WBGene00008549	transcript	F07A11.6b	protein_coding
II	11624127	G	[T]	{G, T}	0.0923077	1	TRUE	FALSE	FALSE	0.168873	65	0	6	59	T	missense_variant	MODERATE	din-1	WBGene00008549	transcript	F07A11.6b	protein_coding
II	11624142	C	[A]	{C, A}	0.153846	1	TRUE	FALSE	FALSE	0.262373	65	0	10	55	A	missense_variant	MODERATE	din-1	WBGene00008549	transcript	F07A11.6b	protein_coding
II	11624318	G	[A]	{G, A}	0.0461538	1	TRUE	FALSE	TRUE	0.0887299	65	0	3	62	A	missense_variant	MODERATE	din-1	WBGene00008549	transcript	F07A11.6b	protein_coding
II	11624336	G	[A]	{G, A}	0.0769231	1	TRUE	FALSE	TRUE	0.143113	65	0	5	60	A	missense_variant	MODERATE	din-1	WBGene00008549	transcript	F07A11.6b	protein_coding
II	11624337	G	[A]	{G, A}	0.0153846	1	TRUE	FALSE	TRUE	0.0305307	65	0	1	64	A	missense_variant	MODERATE	din-1	WBGene00008549	transcript	F07A11.6b	protein_coding
II	11624367	C	[A]	{C, A}	0.0461538	1	TRUE	FALSE	FALSE	0.0887299	65	0	3	62	A	missense_variant	MODERATE	din-1	WBGene00008549	transcript	F07A11.6b	protein_coding
II	11624957	T	[A]	{A, T}	0.907692	1	TRUE	FALSE	FALSE	0.168873	65	0	59	6	A	missense_variant	MODERATE	din-1	WBGene00008549	transcript	F07A11.6b	protein_coding
II	11625003	G	[T]	{G, T}	0.0153846	1	TRUE	FALSE	FALSE	0.0305307	65	0	1	64	T	missense_variant	MODERATE	din-1	WBGene00008549	transcript	F07A11.6b	protein_coding
II	11625183	A	[G]	{G, A}	0.0923077	1	TRUE	FALSE	TRUE	0.168873	65	0	6	59	G	missense_variant	MODERATE	din-1	WBGene00008549	transcript	F07A11.6b	protein_coding
II	11625337	C	[T]	{C, T}	0.0923077	1	TRUE	FALSE	TRUE	0.168873	65	0	6	59	T	missense_variant	MODERATE	din-1	WBGene00008549	transcript	F07A11.6b	protein_coding
II	11625424	C	[T]	{C, T}	0.015873	1	TRUE	FALSE	TRUE	0.0314921	63	0	1	62	T	missense_variant	MODERATE	din-1	WBGene00008549	transcript	F07A11.6b	protein_coding
II	11625922	T	[C]	{C, T}	0.015873	1	TRUE	FALSE	TRUE	0.0314921	63	0	1	62	C	missense_variant	MODERATE	din-1	WBGene00008549	transcript	F07A11.6b	protein_coding
II	11626217	G	[T]	{G, T}	0.0153846	1	TRUE	FALSE	FALSE	0.0305307	65	0	1	64	T	missense_variant	MODERATE	din-1	WBGene00008549	transcript	F07A11.6b	protein_coding
II	11626436	A	[G]	{G, A}	0.0923077	1	TRUE	FALSE	TRUE	0.168873	65	0	6	59	G	missense_variant	MODERATE	din-1	WBGene00008549	transcript	F07A11.6b	protein_coding
II	11626448	T	[A]	{A, T}	0.138462	1	TRUE	FALSE	FALSE	0.240429	65	0	9	56	A	missense_variant	MODERATE	din-1	WBGene00008549	transcript	F07A11.6b	protein_coding
II	11626691	C	[T]	{C, T}	0.323077	1	TRUE	FALSE	TRUE	0.440787	65	0	21	44	T	missense_variant	MODERATE	din-1	WBGene00008549	transcript	F07A11.6b	protein_coding
II	11627041	G	[C]	{C, G}	0.703125	1	TRUE	FALSE	FALSE	0.420768	64	0	45	19	C	missense_variant	MODERATE	din-1	WBGene00008549	transcript	F07A11.6b	protein_coding
II	11627819	C	[T]	{C, T}	0.0153846	1	TRUE	FALSE	TRUE	0.0305307	65	0	1	64	T	missense_variant	MODERATE	din-1	WBGene00008549	transcript	F07A11.6b	protein_coding
II	11628058	G	[A]	{G, A}	0.0769231	1	TRUE	FALSE	TRUE	0.143113	65	0	5	60	A	missense_variant	MODERATE	din-1	WBGene00008549	transcript	F07A11.6b	protein_coding
II	11628127	T	[A]	{A, T}	0.0153846	1	TRUE	FALSE	FALSE	0.0305307	65	0	1	64	A	missense_variant	MODERATE	din-1	WBGene00008549	transcript	F07A11.6b	protein_coding
II	11628544	A	[G]	{G, A}	0.0923077	1	TRUE	FALSE	TRUE	0.168873	65	0	6	59	G	missense_variant	MODERATE	din-1	WBGene00008549	transcript	F07A11.6b	protein_coding
II	11629179	C	[T]	{C, T}	0.0153846	1	TRUE	FALSE	TRUE	0.0305307	65	0	1	64	T	missense_variant	MODERATE	din-1	WBGene00008549	transcript	F07A11.6b	protein_coding
II	11640886	CGGA	[CATCTCACAAAAGATCAAAGGA, C]	{C, CGGA, CATCTCACAAAAGATCAAAGGA}	0.0230769	1	FALSE	TRUE	FALSE	0.0454383	65	3	0	62	CATCTCACAAAAGATCAAAGGA	disruptive_inframe_insertion	MODERATE	kin-6	WBGene00002194	transcript	ZK20.2	protein_coding
II	11641036	C	[A]	{C, A}	0.0153846	1	TRUE	FALSE	FALSE	0.0305307	65	0	1	64	A	missense_variant	MODERATE	kin-6	WBGene00002194	transcript	ZK20.2	protein_coding
II	11641090	A	[G]	{G, A}	0.0153846	1	TRUE	FALSE	TRUE	0.0305307	65	0	1	64	G	missense_variant	MODERATE	kin-6	WBGene00002194	transcript	ZK20.2	protein_coding
II	11641091	C	[T]	{C, T}	0.0923077	1	TRUE	FALSE	TRUE	0.168873	65	0	6	59	T	missense_variant	MODERATE	kin-6	WBGene00002194	transcript	ZK20.2	protein_coding
II	11641348	C	[A]	{C, A}	0.0153846	1	TRUE	FALSE	FALSE	0.0305307	65	0	1	64	A	missense_variant	MODERATE	kin-6	WBGene00002194	transcript	ZK20.2	protein_coding
II	11641464	T	[G]	{G, T}	0.0615385	1	TRUE	FALSE	FALSE	0.116398	65	0	4	61	G	missense_variant	MODERATE	kin-6	WBGene00002194	transcript	ZK20.2	protein_coding
II	11641467	C	[A]	{C, A}	0.0153846	1	TRUE	FALSE	FALSE	0.0305307	65	0	1	64	A	missense_variant	MODERATE	kin-6	WBGene00002194	transcript	ZK20.2	protein_coding
II	11646867	T	[C]	{C, T}	0.169231	1	TRUE	FALSE	TRUE	0.283363	65	0	11	54	C	missense_variant	MODERATE	ghi-1	WBGene00013923	transcript	ZK20.1	protein_coding
II	11647826	T	[C]	{C, T}	0.907692	1	TRUE	FALSE	TRUE	0.168873	65	0	59	6	C	missense_variant	MODERATE	ghi-1	WBGene00013923	transcript	ZK20.1	protein_coding
II	11647856	A	[C]	{C, A}	0.184615	1	TRUE	FALSE	FALSE	0.303399	65	0	12	53	C	missense_variant	MODERATE	ghi-1	WBGene00013923	transcript	ZK20.1	protein_coding
II	11648180	T	[A]	{A, T}	0.0307692	1	TRUE	FALSE	FALSE	0.0601073	65	0	2	63	A	missense_variant	MODERATE	ghi-1	WBGene00013923	transcript	ZK20.1	protein_coding
II	11648232	G	[T]	{G, T}	0.184615	1	TRUE	FALSE	FALSE	0.303399	65	0	12	53	T	missense_variant	MODERATE	ghi-1	WBGene00013923	transcript	ZK20.1	protein_coding
II	11648353	C	[A]	{C, A}	0.0153846	1	TRUE	FALSE	FALSE	0.0305307	65	0	1	64	A	missense_variant	MODERATE	ghi-1	WBGene00013923	transcript	ZK20.1	protein_coding
II	11648598	A	[T]	{A, T}	0.169231	1	TRUE	FALSE	FALSE	0.283363	65	0	11	54	T	missense_variant	MODERATE	ghi-1	WBGene00013923	transcript	ZK20.1	protein_coding
II	11648693	A	[T]	{A, T}	0.0769231	1	TRUE	FALSE	FALSE	0.143113	65	0	5	60	T	missense_variant	MODERATE	ghi-1	WBGene00013923	transcript	ZK20.1	protein_coding
II	11648734	C	[T]	{C, T}	0.0153846	1	TRUE	FALSE	TRUE	0.0305307	65	0	1	64	T	missense_variant	MODERATE	ghi-1	WBGene00013923	transcript	ZK20.1	protein_coding
II	11648773	T	[A]	{A, T}	0.0769231	1	TRUE	FALSE	FALSE	0.143113	65	0	5	60	A	missense_variant	MODERATE	ghi-1	WBGene00013923	transcript	ZK20.1	protein_coding
II	11649233	C	[T]	{C, T}	0.184615	1	TRUE	FALSE	TRUE	0.303399	65	0	12	53	T	missense_variant	MODERATE	ZK20.4	WBGene00013925	transcript	ZK20.4a.1	protein_coding
II	11649335	G	[C]	{C, G}	0.0153846	1	TRUE	FALSE	FALSE	0.0305307	65	0	1	64	C	missense_variant	MODERATE	ZK20.4	WBGene00013925	transcript	ZK20.4a.1	protein_coding
II	11649393	C	[A]	{C, A}	0.0153846	1	TRUE	FALSE	FALSE	0.0305307	65	0	1	64	A	missense_variant	MODERATE	ZK20.4	WBGene00013925	transcript	ZK20.4a.1	protein_coding
II	11649394	C	[A]	{C, A}	0.0153846	1	TRUE	FALSE	FALSE	0.0305307	65	0	1	64	A	missense_variant	MODERATE	ZK20.4	WBGene00013925	transcript	ZK20.4a.1	protein_coding
II	11650606	G	[A]	{G, A}	0.0153846	1	TRUE	FALSE	TRUE	0.0305307	65	0	1	64	A	missense_variant	MODERATE	ZK20.4	WBGene00013925	transcript	ZK20.4a.1	protein_coding
II	11651835	T	[C]	{C, T}	0.123077	1	TRUE	FALSE	TRUE	0.217531	65	0	8	57	C	missense_variant	MODERATE	rad-23	WBGene00013924	transcript	ZK20.3.1	protein_coding
II	11651849	G	[A]	{G, A}	0.0769231	1	TRUE	FALSE	TRUE	0.143113	65	0	5	60	A	missense_variant	MODERATE	rad-23	WBGene00013924	transcript	ZK20.3.1	protein_coding
II	11652325	CGCAGGAGCG	[C]	{C, CGCAGGAGCG}	0.0769231	1	FALSE	TRUE	FALSE	0.143113	65	0	5	60	C	disruptive_inframe_deletion	MODERATE	rad-23	WBGene00013924	transcript	ZK20.3.1	protein_coding
II	11653539	G	[A]	{G, A}	0.0153846	1	TRUE	FALSE	TRUE	0.0305307	65	0	1	64	A	missense_variant	MODERATE	rpn-12	WBGene00004468	transcript	ZK20.5.1	protein_coding
II	11656358	C	[G]	{C, G}	0.0153846	1	TRUE	FALSE	FALSE	0.0305307	65	0	1	64	G	missense_variant	MODERATE	nep-1	WBGene00013926	transcript	ZK20.6	protein_coding
II	11656870	C	[T]	{C, T}	0.184615	1	TRUE	FALSE	TRUE	0.303399	65	0	12	53	T	missense_variant	MODERATE	nep-1	WBGene00013926	transcript	ZK20.6	protein_coding
II	11662250	C	[T]	{C, T}	0.0151515	1	TRUE	FALSE	TRUE	0.0300717	66	0	1	65	T	missense_variant	MODERATE	trr-1	WBGene00007028	transcript	C47D12.1a	protein_coding
II	11663441	C	[G]	{C, G}	0.0454545	1	TRUE	FALSE	FALSE	0.0874393	66	0	3	63	G	missense_variant	MODERATE	trr-1	WBGene00007028	transcript	C47D12.1a	protein_coding
II	11663823	C	[T]	{C, T}	0.166667	1	TRUE	FALSE	TRUE	0.279898	66	0	11	55	T	missense_variant	MODERATE	trr-1	WBGene00007028	transcript	C47D12.1a	protein_coding
II	11664316	T	[C]	{C, T}	0.0151515	1	TRUE	FALSE	TRUE	0.0300717	66	0	1	65	C	missense_variant	MODERATE	trr-1	WBGene00007028	transcript	C47D12.1a	protein_coding
II	11664938	C	[T]	{C, T}	0.0151515	1	TRUE	FALSE	TRUE	0.0300717	66	0	1	65	T	missense_variant	MODERATE	trr-1	WBGene00007028	transcript	C47D12.1a	protein_coding
II	11664970	G	[A]	{G, A}	0.0151515	1	TRUE	FALSE	TRUE	0.0300717	66	0	1	65	A	missense_variant	MODERATE	trr-1	WBGene00007028	transcript	C47D12.1a	protein_coding
II	11667832	T	[C]	{C, T}	0.0757576	1	TRUE	FALSE	TRUE	0.141106	66	0	5	61	C	missense_variant	MODERATE	trr-1	WBGene00007028	transcript	C47D12.1a	protein_coding
II	11668612	G	[C]	{C, G}	0.0151515	1	TRUE	FALSE	FALSE	0.0300717	66	0	1	65	C	missense_variant	MODERATE	trr-1	WBGene00007028	transcript	C47D12.1a	protein_coding
II	11671406	G	[T]	{G, T}	0.0151515	1	TRUE	FALSE	FALSE	0.0300717	66	0	1	65	T	missense_variant	MODERATE	trr-1	WBGene00007028	transcript	C47D12.1a	protein_coding
II	11671612	T	[A]	{A, T}	0.0151515	1	TRUE	FALSE	FALSE	0.0300717	66	0	1	65	A	missense_variant	MODERATE	trr-1	WBGene00007028	transcript	C47D12.1a	protein_coding
II	11671647	C	[T]	{C, T}	0.0151515	1	TRUE	FALSE	TRUE	0.0300717	66	0	1	65	T	missense_variant	MODERATE	trr-1	WBGene00007028	transcript	C47D12.1a	protein_coding
II	11671958	C	[A]	{C, A}	0.0151515	1	TRUE	FALSE	FALSE	0.0300717	66	0	1	65	A	missense_variant	MODERATE	trr-1	WBGene00007028	transcript	C47D12.1a	protein_coding
II	11672470	T	[A]	{A, T}	0.0151515	1	TRUE	FALSE	FALSE	0.0300717	66	0	1	65	A	missense_variant	MODERATE	trr-1	WBGene00007028	transcript	C47D12.1a	protein_coding
II	11673843	C	[A]	{C, A}	0.0151515	1	TRUE	FALSE	FALSE	0.0300717	66	0	1	65	A	missense_variant	MODERATE	trr-1	WBGene00007028	transcript	C47D12.1a	protein_coding
II	11674018	T	[C]	{C, T}	0.0151515	1	TRUE	FALSE	TRUE	0.0300717	66	0	1	65	C	missense_variant	MODERATE	trr-1	WBGene00007028	transcript	C47D12.1a	protein_coding
II	11674317	A	[T]	{A, T}	0.166667	1	TRUE	FALSE	FALSE	0.279898	66	0	11	55	T	missense_variant&splice_region_variant	MODERATE	trr-1	WBGene00007028	transcript	C47D12.1a	protein_coding
II	11675638	G	[C]	{C, G}	0.0151515	1	TRUE	FALSE	FALSE	0.0300717	66	0	1	65	C	missense_variant	MODERATE	trr-1	WBGene00007028	transcript	C47D12.1a	protein_coding
II	11675814	A	[G]	{G, A}	0.166667	1	TRUE	FALSE	TRUE	0.279898	66	0	11	55	G	missense_variant	MODERATE	trr-1	WBGene00007028	transcript	C47D12.1a	protein_coding
II	11675846	G	[A]	{G, A}	0.575758	1	TRUE	FALSE	TRUE	0.492251	66	0	38	28	A	missense_variant	MODERATE	trr-1	WBGene00007028	transcript	C47D12.1a	protein_coding
II	11676356	A	[G]	{G, A}	0.0151515	1	TRUE	FALSE	TRUE	0.0300717	66	0	1	65	G	missense_variant	MODERATE	C47D12.2	WBGene00008136	transcript	C47D12.2	protein_coding
II	11676857	C	[T]	{C, T}	0.0151515	1	TRUE	FALSE	TRUE	0.0300717	66	0	1	65	T	missense_variant	MODERATE	C47D12.2	WBGene00008136	transcript	C47D12.2	protein_coding
II	11677458	G	[A]	{G, A}	0.169231	1	TRUE	FALSE	TRUE	0.283363	65	0	11	54	A	missense_variant	MODERATE	C47D12.2	WBGene00008136	transcript	C47D12.2	protein_coding
II	11677614	A	[G]	{G, A}	0.0153846	1	TRUE	FALSE	TRUE	0.0305307	65	0	1	64	G	missense_variant	MODERATE	C47D12.2	WBGene00008136	transcript	C47D12.2	protein_coding
II	11677701	A	[T]	{A, T}	0.0153846	1	TRUE	FALSE	FALSE	0.0305307	65	0	1	64	T	missense_variant	MODERATE	C47D12.2	WBGene00008136	transcript	C47D12.2	protein_coding
II	11678808	T	[A]	{A, T}	0.015625	1	TRUE	FALSE	FALSE	0.0310039	64	0	1	63	A	missense_variant	MODERATE	C47D12.2	WBGene00008136	transcript	C47D12.2	protein_coding
II	11678841	G	[A]	{G, A}	0.078125	1	TRUE	FALSE	TRUE	0.145177	64	0	5	59	A	missense_variant	MODERATE	C47D12.2	WBGene00008136	transcript	C47D12.2	protein_coding
II	11679052	G	[A]	{G, A}	0.078125	1	TRUE	FALSE	TRUE	0.145177	64	0	5	59	A	missense_variant	MODERATE	C47D12.2	WBGene00008136	transcript	C47D12.2	protein_coding
II	11679266	G	[A]	{G, A}	0.015625	1	TRUE	FALSE	TRUE	0.0310039	64	0	1	63	A	missense_variant	MODERATE	sfxn-1.4	WBGene00008137	transcript	C47D12.3a	protein_coding
II	11679295	G	[A]	{G, A}	0.015625	1	TRUE	FALSE	TRUE	0.0310039	64	0	1	63	A	missense_variant	MODERATE	sfxn-1.4	WBGene00008137	transcript	C47D12.3a	protein_coding
II	11679388	G	[A]	{G, A}	0.28125	1	TRUE	FALSE	TRUE	0.40748	64	0	18	46	A	missense_variant	MODERATE	sfxn-1.4	WBGene00008137	transcript	C47D12.3a	protein_coding
II	11679692	G	[A]	{G, A}	0.078125	1	TRUE	FALSE	TRUE	0.145177	64	0	5	59	A	missense_variant	MODERATE	sfxn-1.4	WBGene00008137	transcript	C47D12.3a	protein_coding
II	11679734	C	[T]	{C, T}	0.15625	1	TRUE	FALSE	TRUE	0.265748	64	0	10	54	T	missense_variant	MODERATE	sfxn-1.4	WBGene00008137	transcript	C47D12.3a	protein_coding
II	11679808	C	[T]	{C, T}	0.015625	1	TRUE	FALSE	TRUE	0.0310039	64	0	1	63	T	missense_variant	MODERATE	sfxn-1.4	WBGene00008137	transcript	C47D12.3a	protein_coding
II	11679850	A	[G]	{G, A}	0.015625	1	TRUE	FALSE	TRUE	0.0310039	64	0	1	63	G	missense_variant	MODERATE	sfxn-1.4	WBGene00008137	transcript	C47D12.3a	protein_coding
II	11680854	G	[T]	{G, T}	0.047619	1	TRUE	FALSE	FALSE	0.0914286	63	0	3	60	T	missense_variant	MODERATE	sfxn-1.4	WBGene00008137	transcript	C47D12.3a	protein_coding
II	11681880	C	[A]	{C, A}	0.078125	1	TRUE	FALSE	FALSE	0.145177	64	0	5	59	A	missense_variant	MODERATE	C47D12.4	WBGene00008138	transcript	C47D12.4	protein_coding
II	11682026	T	[C]	{C, T}	0.0153846	1	TRUE	FALSE	TRUE	0.0305307	65	0	1	64	C	missense_variant	MODERATE	C47D12.4	WBGene00008138	transcript	C47D12.4	protein_coding
II	11682245	G	[T]	{G, T}	0.0769231	1	TRUE	FALSE	FALSE	0.143113	65	0	5	60	T	missense_variant	MODERATE	C47D12.4	WBGene00008138	transcript	C47D12.4	protein_coding
II	11682303	T	[A]	{A, T}	0.0769231	1	TRUE	FALSE	FALSE	0.143113	65	0	5	60	A	missense_variant	MODERATE	C47D12.4	WBGene00008138	transcript	C47D12.4	protein_coding
II	11682404	C	[T]	{C, T}	0.0769231	1	TRUE	FALSE	TRUE	0.143113	65	0	5	60	T	missense_variant	MODERATE	C47D12.4	WBGene00008138	transcript	C47D12.4	protein_coding
II	11682465	G	[A]	{G, A}	0.0153846	1	TRUE	FALSE	TRUE	0.0305307	65	0	1	64	A	missense_variant	MODERATE	C47D12.4	WBGene00008138	transcript	C47D12.4	protein_coding
II	11682595	C	[G]	{C, G}	0.0153846	1	TRUE	FALSE	FALSE	0.0305307	65	0	1	64	G	missense_variant	MODERATE	C47D12.4	WBGene00008138	transcript	C47D12.4	protein_coding
II	11682768	C	[T]	{C, T}	0.0307692	1	TRUE	FALSE	TRUE	0.0601073	65	0	2	63	T	missense_variant	MODERATE	C47D12.4	WBGene00008138	transcript	C47D12.4	protein_coding
II	11683641	T	[C]	{C, T}	0.138462	1	TRUE	FALSE	TRUE	0.240429	65	0	9	56	C	missense_variant	MODERATE	C47D12.5	WBGene00008139	transcript	C47D12.5	protein_coding
II	11689043	C	[T]	{C, T}	0.0153846	1	TRUE	FALSE	TRUE	0.0305307	65	0	1	64	T	missense_variant	MODERATE	kel-1	WBGene00002184	transcript	C47D12.7a	protein_coding
II	11690301	A	[G]	{G, A}	0.015625	1	TRUE	FALSE	TRUE	0.0310039	64	0	1	63	G	missense_variant	MODERATE	kel-1	WBGene00002184	transcript	C47D12.7a	protein_coding
II	11690807	C	[T]	{C, T}	0.015625	1	TRUE	FALSE	TRUE	0.0310039	64	0	1	63	T	missense_variant	MODERATE	kel-1	WBGene00002184	transcript	C47D12.7a	protein_coding
II	11691069	C	[T]	{C, T}	0.328125	1	TRUE	FALSE	TRUE	0.44439	64	0	21	43	T	missense_variant	MODERATE	kel-1	WBGene00002184	transcript	C47D12.7a	protein_coding
II	11691270	A	[G]	{G, A}	0.140625	1	TRUE	FALSE	TRUE	0.243602	64	0	9	55	G	missense_variant	MODERATE	kel-1	WBGene00002184	transcript	C47D12.7a	protein_coding
II	11693160	A	[T]	{A, T}	0.907692	1	TRUE	FALSE	FALSE	0.168873	65	0	59	6	T	missense_variant	MODERATE	tars-1	WBGene00006617	transcript	C47D12.6a	protein_coding
II	11693989	T	[A]	{A, T}	0.0307692	1	TRUE	FALSE	FALSE	0.0601073	65	0	2	63	A	missense_variant	MODERATE	tars-1	WBGene00006617	transcript	C47D12.6a	protein_coding
II	11694220	G	[C]	{C, G}	0.0153846	1	TRUE	FALSE	FALSE	0.0305307	65	0	1	64	C	missense_variant	MODERATE	tars-1	WBGene00006617	transcript	C47D12.6a	protein_coding
II	11694808	A	[G]	{G, A}	0.0769231	1	TRUE	FALSE	TRUE	0.143113	65	0	5	60	G	missense_variant	MODERATE	kel-1	WBGene00002184	transcript	C47D12.7a	protein_coding
II	11695185	T	[C]	{C, T}	0.0153846	1	TRUE	FALSE	TRUE	0.0305307	65	0	1	64	C	missense_variant	MODERATE	kel-1	WBGene00002184	transcript	C47D12.7a	protein_coding
II	11696997	A	[G]	{G, A}	0.753846	1	TRUE	FALSE	TRUE	0.374001	65	0	49	16	G	missense_variant	MODERATE	xpf-1	WBGene00008140	transcript	C47D12.8.1	protein_coding
II	11697255	A	[G]	{G, A}	0.333333	1	TRUE	FALSE	TRUE	0.448179	60	0	20	40	G	missense_variant	MODERATE	xpf-1	WBGene00008140	transcript	C47D12.8.1	protein_coding
II	11698240	A	[G]	{G, A}	0.0153846	1	TRUE	FALSE	TRUE	0.0305307	65	0	1	64	G	missense_variant	MODERATE	xpf-1	WBGene00008140	transcript	C47D12.8.1	protein_coding
II	11699290	C	[T]	{C, T}	0.0461538	1	TRUE	FALSE	TRUE	0.0887299	65	0	3	62	T	missense_variant	MODERATE	inos-1	WBGene00012148	transcript	VF13D12L.1	protein_coding
II	11699968	G	[T]	{G, T}	0.0461538	1	TRUE	FALSE	FALSE	0.0887299	65	0	3	62	T	missense_variant	MODERATE	inos-1	WBGene00012148	transcript	VF13D12L.1	protein_coding
II	11700142	G	[A]	{G, A}	0.0153846	1	TRUE	FALSE	TRUE	0.0305307	65	0	1	64	A	missense_variant	MODERATE	inos-1	WBGene00012148	transcript	VF13D12L.1	protein_coding
II	11701518	C	[T]	{C, T}	0.0185185	1	TRUE	FALSE	TRUE	0.0366909	54	0	1	53	T	missense_variant	MODERATE	xpf-1	WBGene00008140	transcript	C47D12.8.1	protein_coding
II	11701522	A	[T]	{A, T}	0.0555556	1	TRUE	FALSE	FALSE	0.105919	54	0	3	51	T	missense_variant	MODERATE	xpf-1	WBGene00008140	transcript	C47D12.8.1	protein_coding
II	11701797	G	[A]	{G, A}	0.0185185	1	TRUE	FALSE	TRUE	0.0366909	54	0	1	53	A	missense_variant	MODERATE	xpf-1	WBGene00008140	transcript	C47D12.8.1	protein_coding
II	11704101	C	[A]	{C, A}	0.166667	1	TRUE	FALSE	FALSE	0.279898	66	0	11	55	A	missense_variant	MODERATE	xpf-1	WBGene00008140	transcript	C47D12.8.1	protein_coding
II	11704115	T	[C]	{C, T}	0.0757576	1	TRUE	FALSE	TRUE	0.141106	66	0	5	61	C	missense_variant	MODERATE	xpf-1	WBGene00008140	transcript	C47D12.8.1	protein_coding
II	11704181	C	[A]	{C, A}	0.0151515	1	TRUE	FALSE	FALSE	0.0300717	66	0	1	65	A	missense_variant	MODERATE	xpf-1	WBGene00008140	transcript	C47D12.8.1	protein_coding
II	11704247	T	[A]	{A, T}	0.742424	1	TRUE	FALSE	FALSE	0.385381	66	0	49	17	A	missense_variant	MODERATE	xpf-1	WBGene00008140	transcript	C47D12.8.1	protein_coding
II	11706183	A	[G]	{G, A}	0.166667	1	TRUE	FALSE	TRUE	0.279898	66	0	11	55	G	missense_variant	MODERATE	VF13D12L.3	WBGene00012149	transcript	VF13D12L.3.1	protein_coding
II	11706610	A	[G]	{G, A}	0.0151515	1	TRUE	FALSE	TRUE	0.0300717	66	0	1	65	G	missense_variant	MODERATE	VF13D12L.3	WBGene00012149	transcript	VF13D12L.3.1	protein_coding
II	11706632	C	[G]	{C, G}	0.030303	1	TRUE	FALSE	FALSE	0.0592181	66	0	2	64	G	missense_variant	MODERATE	VF13D12L.3	WBGene00012149	transcript	VF13D12L.3.1	protein_coding
II	11706787	A	[G]	{G, A}	0.0151515	1	TRUE	FALSE	TRUE	0.0300717	66	0	1	65	G	missense_variant	MODERATE	VF13D12L.3	WBGene00012149	transcript	VF13D12L.3.1	protein_coding
II	11707685	C	[A]	{C, A}	0.0757576	1	TRUE	FALSE	FALSE	0.141106	66	0	5	61	A	missense_variant	MODERATE	F13D12.9	WBGene00008743	transcript	F13D12.9.1	protein_coding
II	11707756	C	[T]	{C, T}	0.181818	1	TRUE	FALSE	TRUE	0.299792	66	0	12	54	T	missense_variant	MODERATE	F13D12.9	WBGene00008743	transcript	F13D12.9.1	protein_coding
II	11707787	C	[T]	{C, T}	0.181818	1	TRUE	FALSE	TRUE	0.299792	66	0	12	54	T	missense_variant	MODERATE	F13D12.9	WBGene00008743	transcript	F13D12.9.1	protein_coding
II	11707797	C	[T]	{C, T}	0.0454545	1	TRUE	FALSE	TRUE	0.0874393	66	0	3	63	T	missense_variant	MODERATE	F13D12.9	WBGene00008743	transcript	F13D12.9.1	protein_coding
II	11708573	T	[C]	{C, T}	0.166667	1	TRUE	FALSE	TRUE	0.279898	66	0	11	55	C	missense_variant	MODERATE	F13D12.9	WBGene00008743	transcript	F13D12.9.1	protein_coding
II	11708710	A	[C]	{C, A}	0.0151515	1	TRUE	FALSE	FALSE	0.0300717	66	0	1	65	C	missense_variant	MODERATE	F13D12.9	WBGene00008743	transcript	F13D12.9.1	protein_coding
II	11708853	A	[G]	{G, A}	0.0757576	1	TRUE	FALSE	TRUE	0.141106	66	0	5	61	G	missense_variant	MODERATE	F13D12.9	WBGene00008743	transcript	F13D12.9.1	protein_coding
II	11708892	T	[G]	{G, T}	0.0151515	1	TRUE	FALSE	FALSE	0.0300717	66	0	1	65	G	missense_variant	MODERATE	F13D12.9	WBGene00008743	transcript	F13D12.9.1	protein_coding
II	11709027	C	[T]	{C, T}	0.0151515	1	TRUE	FALSE	TRUE	0.0300717	66	0	1	65	T	missense_variant	MODERATE	F13D12.9	WBGene00008743	transcript	F13D12.9.1	protein_coding
II	11709068	G	[A]	{G, A}	0.0151515	1	TRUE	FALSE	TRUE	0.0300717	66	0	1	65	A	missense_variant	MODERATE	F13D12.9	WBGene00008743	transcript	F13D12.9.1	protein_coding
II	11709180	C	[T]	{C, T}	0.0151515	1	TRUE	FALSE	TRUE	0.0300717	66	0	1	65	T	missense_variant	MODERATE	F13D12.9	WBGene00008743	transcript	F13D12.9.1	protein_coding
II	11712171	G	[T]	{G, T}	0.0151515	1	TRUE	FALSE	FALSE	0.0300717	66	0	1	65	T	missense_variant	MODERATE	VF13D12L.3	WBGene00012149	transcript	VF13D12L.3.1	protein_coding
II	11713457	G	[A]	{G, A}	0.0151515	1	TRUE	FALSE	TRUE	0.0300717	66	0	1	65	A	missense_variant	MODERATE	VF13D12L.3	WBGene00012149	transcript	VF13D12L.3.1	protein_coding
II	11714037	T	[C]	{C, T}	0.0151515	1	TRUE	FALSE	TRUE	0.0300717	66	0	1	65	C	missense_variant	MODERATE	F13D12.10	WBGene00008744	transcript	F13D12.10a	protein_coding
II	11715312	C	[T]	{C, T}	0.0151515	1	TRUE	FALSE	TRUE	0.0300717	66	0	1	65	T	missense_variant	MODERATE	F13D12.10	WBGene00008744	transcript	F13D12.10a	protein_coding
II	11715543	G	[T]	{G, T}	0.106061	1	TRUE	FALSE	FALSE	0.191071	66	0	7	59	T	missense_variant	MODERATE	F13D12.10	WBGene00008744	transcript	F13D12.10a	protein_coding
II	11721778	T	[C]	{C, T}	0.0151515	1	TRUE	FALSE	TRUE	0.0300717	66	0	1	65	C	missense_variant	MODERATE	F13D12.3	WBGene00008739	transcript	F13D12.3	protein_coding
II	11721813	A	[T]	{A, T}	0.0151515	1	TRUE	FALSE	FALSE	0.0300717	66	0	1	65	T	missense_variant	MODERATE	F13D12.3	WBGene00008739	transcript	F13D12.3	protein_coding
II	11721822	C	[T]	{C, T}	0.0757576	1	TRUE	FALSE	TRUE	0.141106	66	0	5	61	T	missense_variant	MODERATE	F13D12.3	WBGene00008739	transcript	F13D12.3	protein_coding
II	11721837	C	[G]	{C, G}	0.0151515	1	TRUE	FALSE	FALSE	0.0300717	66	0	1	65	G	missense_variant	MODERATE	F13D12.3	WBGene00008739	transcript	F13D12.3	protein_coding
II	11727390	A	[T]	{A, T}	0.0151515	1	TRUE	FALSE	FALSE	0.0300717	66	0	1	65	T	missense_variant	MODERATE	F13D12.5	WBGene00008740	transcript	F13D12.5	protein_coding
II	11727510	G	[A]	{G, A}	0.0151515	1	TRUE	FALSE	TRUE	0.0300717	66	0	1	65	A	missense_variant	MODERATE	F13D12.5	WBGene00008740	transcript	F13D12.5	protein_coding
II	11727714	G	[A]	{G, A}	0.0757576	1	TRUE	FALSE	TRUE	0.141106	66	0	5	61	A	missense_variant	MODERATE	F13D12.5	WBGene00008740	transcript	F13D12.5	protein_coding
II	11729405	C	[A]	{C, A}	0.0606061	1	TRUE	FALSE	FALSE	0.114735	66	0	4	62	A	missense_variant	MODERATE	alh-8	WBGene00000114	transcript	F13D12.4a.1	protein_coding
II	11730557	G	[A]	{G, A}	0.0606061	1	TRUE	FALSE	TRUE	0.114735	66	0	4	62	A	missense_variant	MODERATE	alh-8	WBGene00000114	transcript	F13D12.4a.1	protein_coding
II	11731310	A	[C]	{C, A}	0.0454545	1	TRUE	FALSE	FALSE	0.0874393	66	0	3	63	C	missense_variant	MODERATE	F13D12.8	WBGene00008742	transcript	F13D12.8	protein_coding
II	11731764	A	[G]	{G, A}	0.0151515	1	TRUE	FALSE	TRUE	0.0300717	66	0	1	65	G	missense_variant	MODERATE	F13D12.8	WBGene00008742	transcript	F13D12.8	protein_coding
II	11742620	T	[C]	{C, T}	0.0151515	1	TRUE	FALSE	TRUE	0.0300717	66	0	1	65	C	missense_variant	MODERATE	F13D12.6	WBGene00008741	transcript	F13D12.6.1	protein_coding
II	11762351	C	[T]	{C, T}	0.0151515	1	TRUE	FALSE	TRUE	0.0300717	66	0	1	65	T	missense_variant	MODERATE	F44E5.3	WBGene00009690	transcript	F44E5.3	protein_coding
II	11762369	T	[G]	{G, T}	0.0151515	1	TRUE	FALSE	FALSE	0.0300717	66	0	1	65	G	missense_variant	MODERATE	F44E5.3	WBGene00009690	transcript	F44E5.3	protein_coding
II	11762396	C	[T]	{C, T}	0.0151515	1	TRUE	FALSE	TRUE	0.0300717	66	0	1	65	T	missense_variant	MODERATE	F44E5.3	WBGene00009690	transcript	F44E5.3	protein_coding
II	11762465	C	[T]	{C, T}	0.030303	1	TRUE	FALSE	TRUE	0.0592181	66	0	2	64	T	missense_variant	MODERATE	F44E5.3	WBGene00009690	transcript	F44E5.3	protein_coding
II	11762470	T	[C]	{C, T}	0.0151515	1	TRUE	FALSE	TRUE	0.0300717	66	0	1	65	C	missense_variant	MODERATE	F44E5.3	WBGene00009690	transcript	F44E5.3	protein_coding
II	11762473	A	[C]	{C, A}	0.166667	1	TRUE	FALSE	FALSE	0.279898	66	0	11	55	C	missense_variant	MODERATE	F44E5.3	WBGene00009690	transcript	F44E5.3	protein_coding
II	11762969	C	[T]	{C, T}	0.0454545	1	TRUE	FALSE	TRUE	0.0874393	66	0	3	63	T	missense_variant	MODERATE	F44E5.3	WBGene00009690	transcript	F44E5.3	protein_coding
II	11763958	A	[C]	{C, A}	0.69697	1	TRUE	FALSE	FALSE	0.42563	66	0	46	20	C	missense_variant	MODERATE	F44E5.3	WBGene00009690	transcript	F44E5.3	protein_coding
II	11763998	A	[G]	{G, A}	0.0606061	1	TRUE	FALSE	TRUE	0.114735	66	0	4	62	G	missense_variant	MODERATE	F44E5.3	WBGene00009690	transcript	F44E5.3	protein_coding
II	11764014	G	[T]	{G, T}	0.0151515	1	TRUE	FALSE	FALSE	0.0300717	66	0	1	65	T	missense_variant	MODERATE	F44E5.3	WBGene00009690	transcript	F44E5.3	protein_coding
II	11764019	G	[A]	{G, A}	0.030303	1	TRUE	FALSE	TRUE	0.0592181	66	0	2	64	A	missense_variant	MODERATE	F44E5.3	WBGene00009690	transcript	F44E5.3	protein_coding
II	11764069	T	[G]	{G, T}	0.030303	1	TRUE	FALSE	FALSE	0.0592181	66	0	2	64	G	missense_variant	MODERATE	F44E5.3	WBGene00009690	transcript	F44E5.3	protein_coding
II	11764079	T	[C]	{C, T}	0.030303	1	TRUE	FALSE	TRUE	0.0592181	66	0	2	64	C	missense_variant	MODERATE	F44E5.3	WBGene00009690	transcript	F44E5.3	protein_coding
II	11765084	C	[T]	{C, T}	0.0151515	1	TRUE	FALSE	TRUE	0.0300717	66	0	1	65	T	missense_variant	MODERATE	F44E5.3	WBGene00009690	transcript	F44E5.3	protein_coding
II	11765288	G	[T]	{G, T}	0.0151515	1	TRUE	FALSE	FALSE	0.0300717	66	0	1	65	T	missense_variant	MODERATE	F44E5.3	WBGene00009690	transcript	F44E5.3	protein_coding
II	11767063	A	[G]	{G, A}	0.186441	1	TRUE	FALSE	TRUE	0.305954	59	0	11	48	G	missense_variant	MODERATE	F44E5.2	WBGene00009689	transcript	F44E5.2	protein_coding
II	11767161	A	[C]	{C, A}	0.237288	1	TRUE	FALSE	FALSE	0.365059	59	0	14	45	C	missense_variant	MODERATE	F44E5.2	WBGene00009689	transcript	F44E5.2	protein_coding
II	11767476	G	[A]	{G, A}	0.118644	1	TRUE	FALSE	TRUE	0.210923	59	0	7	52	A	missense_variant	MODERATE	F44E5.2	WBGene00009689	transcript	F44E5.2	protein_coding
II	11767531	T	[G]	{G, T}	0.0169492	1	TRUE	FALSE	FALSE	0.0336086	59	0	1	58	G	missense_variant	MODERATE	F44E5.2	WBGene00009689	transcript	F44E5.2	protein_coding
II	11767577	T	[G]	{G, T}	0.0833333	1	TRUE	FALSE	FALSE	0.154062	60	0	5	55	G	missense_variant	MODERATE	F44E5.2	WBGene00009689	transcript	F44E5.2	protein_coding
II	11767797	C	[T]	{C, T}	0.0333333	1	TRUE	FALSE	TRUE	0.064986	60	0	2	58	T	missense_variant	MODERATE	F44E5.2	WBGene00009689	transcript	F44E5.2	protein_coding
II	11767808	T	[A]	{A, T}	0.183333	1	TRUE	FALSE	FALSE	0.301961	60	0	11	49	A	missense_variant	MODERATE	F44E5.2	WBGene00009689	transcript	F44E5.2	protein_coding
II	11767987	A	[T]	{A, T}	0.0333333	1	TRUE	FALSE	FALSE	0.064986	60	0	2	58	T	missense_variant	MODERATE	F44E5.2	WBGene00009689	transcript	F44E5.2	protein_coding
II	11768057	C	[A]	{C, A}	0.0833333	1	TRUE	FALSE	FALSE	0.154062	60	0	5	55	A	missense_variant	MODERATE	F44E5.2	WBGene00009689	transcript	F44E5.2	protein_coding
II	11768286	G	[C]	{C, G}	0.0166667	1	TRUE	FALSE	FALSE	0.0330532	60	0	1	59	C	missense_variant	MODERATE	F44E5.2	WBGene00009689	transcript	F44E5.2	protein_coding
II	11768345	A	[G]	{G, A}	0.116667	1	TRUE	FALSE	TRUE	0.207843	60	0	7	53	G	missense_variant	MODERATE	F44E5.2	WBGene00009689	transcript	F44E5.2	protein_coding
II	11768359	C	[A]	{C, A}	0.0166667	1	TRUE	FALSE	FALSE	0.0330532	60	0	1	59	A	missense_variant	MODERATE	F44E5.2	WBGene00009689	transcript	F44E5.2	protein_coding
II	11768360	C	[A]	{C, A}	0.0166667	1	TRUE	FALSE	FALSE	0.0330532	60	0	1	59	A	missense_variant	MODERATE	F44E5.2	WBGene00009689	transcript	F44E5.2	protein_coding
II	11768539	G	[A]	{G, A}	0.0333333	1	TRUE	FALSE	TRUE	0.064986	60	0	2	58	A	missense_variant	MODERATE	F44E5.2	WBGene00009689	transcript	F44E5.2	protein_coding
II	11768616	T	[A]	{A, T}	0.0338983	1	TRUE	FALSE	FALSE	0.0660582	59	0	2	57	A	missense_variant	MODERATE	F44E5.2	WBGene00009689	transcript	F44E5.2	protein_coding
II	11772778	C	[T]	{C, T}	0.0151515	1	TRUE	FALSE	TRUE	0.0300717	66	0	1	65	T	missense_variant	MODERATE	F44E5.15	WBGene00206377	transcript	F44E5.15	protein_coding
II	11773269	G	[A]	{G, A}	0.0151515	1	TRUE	FALSE	TRUE	0.0300717	66	0	1	65	A	missense_variant	MODERATE	F44E5.15	WBGene00206377	transcript	F44E5.15	protein_coding
II	11773290	T	[G]	{G, T}	0.0151515	1	TRUE	FALSE	FALSE	0.0300717	66	0	1	65	G	missense_variant	MODERATE	F44E5.15	WBGene00206377	transcript	F44E5.15	protein_coding
II	11773512	A	[C]	{C, A}	0.0151515	1	TRUE	FALSE	FALSE	0.0300717	66	0	1	65	C	missense_variant	MODERATE	F44E5.15	WBGene00206377	transcript	F44E5.15	protein_coding
II	11773715	A	[C]	{C, A}	0.184615	1	TRUE	FALSE	FALSE	0.303399	65	0	12	53	C	missense_variant	MODERATE	F44E5.15	WBGene00206377	transcript	F44E5.15	protein_coding
II	11773863	A	[T]	{A, T}	0.0153846	1	TRUE	FALSE	FALSE	0.0305307	65	0	1	64	T	missense_variant	MODERATE	F44E5.15	WBGene00206377	transcript	F44E5.15	protein_coding
II	11773882	T	[C]	{C, T}	0.0307692	1	TRUE	FALSE	TRUE	0.0601073	65	0	2	63	C	missense_variant	MODERATE	F44E5.15	WBGene00206377	transcript	F44E5.15	protein_coding
II	11774000	G	[A, T]	{G, A, T}	0.424242	1	TRUE	FALSE	FALSE	0.492251	66	0	28	38	T	missense_variant	MODERATE	F44E5.15	WBGene00206377	transcript	F44E5.15	protein_coding
II	11775176	G	[A]	{G, A}	0.030303	1	TRUE	FALSE	TRUE	0.0592181	66	0	2	64	A	missense_variant	MODERATE	patr-1	WBGene00009661	transcript	F43G6.9	protein_coding
II	11776129	G	[A]	{G, A}	0.0909091	1	TRUE	FALSE	TRUE	0.166551	66	0	6	60	A	missense_variant	MODERATE	patr-1	WBGene00009661	transcript	F43G6.9	protein_coding
II	11776280	T	[A]	{A, T}	0.0151515	1	TRUE	FALSE	FALSE	0.0300717	66	0	1	65	A	missense_variant	MODERATE	patr-1	WBGene00009661	transcript	F43G6.9	protein_coding
II	11776456	G	[T]	{G, T}	0.0151515	1	TRUE	FALSE	FALSE	0.0300717	66	0	1	65	T	missense_variant	MODERATE	patr-1	WBGene00009661	transcript	F43G6.9	protein_coding
II	11776491	G	[A]	{G, A}	0.030303	1	TRUE	FALSE	TRUE	0.0592181	66	0	2	64	A	missense_variant	MODERATE	patr-1	WBGene00009661	transcript	F43G6.9	protein_coding
II	11776727	G	[A]	{G, A}	0.0151515	1	TRUE	FALSE	TRUE	0.0300717	66	0	1	65	A	missense_variant	MODERATE	patr-1	WBGene00009661	transcript	F43G6.9	protein_coding
II	11776761	C	[T]	{C, T}	0.0151515	1	TRUE	FALSE	TRUE	0.0300717	66	0	1	65	T	missense_variant	MODERATE	patr-1	WBGene00009661	transcript	F43G6.9	protein_coding
II	11776790	G	[A]	{G, A}	0.030303	1	TRUE	FALSE	TRUE	0.0592181	66	0	2	64	A	missense_variant	MODERATE	patr-1	WBGene00009661	transcript	F43G6.9	protein_coding
II	11778722	C	[T]	{C, T}	0.0151515	1	TRUE	FALSE	TRUE	0.0300717	66	0	1	65	T	missense_variant	MODERATE	dna-2	WBGene00001016	transcript	F43G6.1	protein_coding
II	11778794	G	[T]	{G, T}	0.0151515	1	TRUE	FALSE	FALSE	0.0300717	66	0	1	65	T	missense_variant	MODERATE	dna-2	WBGene00001016	transcript	F43G6.1	protein_coding
II	11779383	C	[G]	{C, G}	0.0151515	1	TRUE	FALSE	FALSE	0.0300717	66	0	1	65	G	missense_variant	MODERATE	dna-2	WBGene00001016	transcript	F43G6.1	protein_coding
II	11779413	A	[G]	{G, A}	0.0151515	1	TRUE	FALSE	TRUE	0.0300717	66	0	1	65	G	missense_variant	MODERATE	dna-2	WBGene00001016	transcript	F43G6.1	protein_coding
II	11779417	C	[A]	{C, A}	0.0151515	1	TRUE	FALSE	FALSE	0.0300717	66	0	1	65	A	missense_variant	MODERATE	dna-2	WBGene00001016	transcript	F43G6.1	protein_coding
II	11779589	C	[T]	{C, T}	0.287879	1	TRUE	FALSE	TRUE	0.413139	66	0	19	47	T	missense_variant	MODERATE	dna-2	WBGene00001016	transcript	F43G6.1	protein_coding
II	11780169	G	[A]	{G, A}	0.0151515	1	TRUE	FALSE	TRUE	0.0300717	66	0	1	65	A	missense_variant	MODERATE	dna-2	WBGene00001016	transcript	F43G6.1	protein_coding
II	11780386	C	[A]	{C, A}	0.166667	1	TRUE	FALSE	FALSE	0.279898	66	0	11	55	A	missense_variant	MODERATE	dna-2	WBGene00001016	transcript	F43G6.1	protein_coding
II	11780767	A	[G]	{G, A}	0.0151515	1	TRUE	FALSE	TRUE	0.0300717	66	0	1	65	G	missense_variant	MODERATE	dna-2	WBGene00001016	transcript	F43G6.1	protein_coding
II	11780910	C	[G]	{C, G}	0.0151515	1	TRUE	FALSE	FALSE	0.0300717	66	0	1	65	G	missense_variant	MODERATE	dna-2	WBGene00001016	transcript	F43G6.1	protein_coding
II	11781041	G	[C]	{C, G}	0.0151515	1	TRUE	FALSE	FALSE	0.0300717	66	0	1	65	C	missense_variant	MODERATE	dna-2	WBGene00001016	transcript	F43G6.1	protein_coding
II	11781458	A	[G]	{G, A}	0.0151515	1	TRUE	FALSE	TRUE	0.0300717	66	0	1	65	G	missense_variant	MODERATE	dna-2	WBGene00001016	transcript	F43G6.1	protein_coding
II	11781574	G	[A]	{G, A}	0.030303	1	TRUE	FALSE	TRUE	0.0592181	66	0	2	64	A	missense_variant	MODERATE	dna-2	WBGene00001016	transcript	F43G6.1	protein_coding
II	11781595	G	[A]	{G, A}	0.287879	1	TRUE	FALSE	TRUE	0.413139	66	0	19	47	A	missense_variant	MODERATE	dna-2	WBGene00001016	transcript	F43G6.1	protein_coding
II	11781675	T	[G]	{G, T}	0.0151515	1	TRUE	FALSE	FALSE	0.0300717	66	0	1	65	G	missense_variant	MODERATE	dna-2	WBGene00001016	transcript	F43G6.1	protein_coding
II	11781973	A	[G]	{G, A}	0.0151515	1	TRUE	FALSE	TRUE	0.0300717	66	0	1	65	G	missense_variant	MODERATE	dna-2	WBGene00001016	transcript	F43G6.1	protein_coding
II	11782262	T	[A]	{A, T}	0.0151515	1	TRUE	FALSE	FALSE	0.0300717	66	0	1	65	A	missense_variant	MODERATE	F43G6.16	WBGene00219294	transcript	F43G6.16	protein_coding
II	11782390	G	[A]	{G, A}	0.287879	1	TRUE	FALSE	TRUE	0.413139	66	0	19	47	A	missense_variant&splice_region_variant	MODERATE	F43G6.16	WBGene00219294	transcript	F43G6.16	protein_coding
II	11795860	G	[T]	{G, T}	0.212121	1	TRUE	FALSE	FALSE	0.336803	66	0	14	52	T	missense_variant	MODERATE	F43G6.4	WBGene00009657	transcript	F43G6.4	protein_coding
II	11796179	G	[T]	{G, T}	0.015625	1	TRUE	FALSE	FALSE	0.0310039	64	0	1	63	T	missense_variant	MODERATE	F43G6.4	WBGene00009657	transcript	F43G6.4	protein_coding
II	11799176	G	[A]	{G, A}	0.0757576	1	TRUE	FALSE	TRUE	0.141106	66	0	5	61	A	missense_variant	MODERATE	hda-5	WBGene00009663	transcript	F43G6.11	protein_coding
II	11799185	A	[T]	{A, T}	0.212121	1	TRUE	FALSE	FALSE	0.336803	66	0	14	52	T	missense_variant&splice_region_variant	MODERATE	hda-5	WBGene00009663	transcript	F43G6.11	protein_coding
II	11799623	A	[G]	{G, A}	0.212121	1	TRUE	FALSE	TRUE	0.336803	66	0	14	52	G	missense_variant	MODERATE	hda-5	WBGene00009663	transcript	F43G6.11	protein_coding
II	11799829	A	[C]	{C, A}	0.212121	1	TRUE	FALSE	FALSE	0.336803	66	0	14	52	C	missense_variant&splice_region_variant	MODERATE	hda-5	WBGene00009663	transcript	F43G6.11	protein_coding
II	11801664	G	[T]	{G, T}	0.030303	1	TRUE	FALSE	FALSE	0.0592181	66	0	2	64	T	missense_variant	MODERATE	hda-5	WBGene00009663	transcript	F43G6.11	protein_coding
II	11801686	G	[A]	{G, A}	0.212121	1	TRUE	FALSE	TRUE	0.336803	66	0	14	52	A	missense_variant	MODERATE	hda-5	WBGene00009663	transcript	F43G6.11	protein_coding
II	11801688	C	[G]	{C, G}	0.212121	1	TRUE	FALSE	FALSE	0.336803	66	0	14	52	G	missense_variant	MODERATE	hda-5	WBGene00009663	transcript	F43G6.11	protein_coding
II	11801706	A	[G]	{G, A}	0.212121	1	TRUE	FALSE	TRUE	0.336803	66	0	14	52	G	missense_variant	MODERATE	hda-5	WBGene00009663	transcript	F43G6.11	protein_coding
II	11801761	C	[G]	{C, G}	0.0151515	1	TRUE	FALSE	FALSE	0.0300717	66	0	1	65	G	missense_variant	MODERATE	hda-5	WBGene00009663	transcript	F43G6.11	protein_coding
II	11802330	C	[A]	{C, A}	0.0151515	1	TRUE	FALSE	FALSE	0.0300717	66	0	1	65	A	missense_variant	MODERATE	hda-5	WBGene00009663	transcript	F43G6.11	protein_coding
II	11802331	C	[T]	{C, T}	0.0151515	1	TRUE	FALSE	TRUE	0.0300717	66	0	1	65	T	missense_variant	MODERATE	hda-5	WBGene00009663	transcript	F43G6.11	protein_coding
II	11802934	C	[A]	{C, A}	0.02	1	TRUE	FALSE	FALSE	0.039596	50	0	1	49	A	missense_variant	MODERATE	F43G6.17	WBGene00219378	transcript	F43G6.17a	protein_coding
II	11803251	T	[C]	{C, T}	0.55	1	TRUE	FALSE	TRUE	0.49916	60	0	33	27	C	missense_variant	MODERATE	F43G6.17	WBGene00219378	transcript	F43G6.17a	protein_coding
II	11803368	A	[C]	{C, A}	0.392308	1	TRUE	FALSE	FALSE	0.480501	65	1	25	39	C	missense_variant	MODERATE	F43G6.17	WBGene00219378	transcript	F43G6.17a	protein_coding
II	11803917	C	[A]	{C, A}	0.030303	1	TRUE	FALSE	FALSE	0.0592181	66	0	2	64	A	missense_variant	MODERATE	F43G6.17	WBGene00219378	transcript	F43G6.17a	protein_coding
II	11806594	T	[G]	{G, T}	0.390625	1	TRUE	FALSE	FALSE	0.479823	64	0	25	39	G	missense_variant	MODERATE	jmjd-1.1	WBGene00005013	transcript	F43G6.6	protein_coding
II	11806609	T	[C]	{C, T}	0.078125	1	TRUE	FALSE	TRUE	0.145177	64	0	5	59	C	missense_variant	MODERATE	jmjd-1.1	WBGene00005013	transcript	F43G6.6	protein_coding
II	11806678	T	[G]	{G, T}	0.078125	1	TRUE	FALSE	FALSE	0.145177	64	0	5	59	G	missense_variant	MODERATE	jmjd-1.1	WBGene00005013	transcript	F43G6.6	protein_coding
II	11806873	C	[A]	{C, A}	0.0606061	1	TRUE	FALSE	FALSE	0.114735	66	0	4	62	A	missense_variant	MODERATE	jmjd-1.1	WBGene00005013	transcript	F43G6.6	protein_coding
II	11806958	G	[C]	{C, G}	0.166667	1	TRUE	FALSE	FALSE	0.279898	66	0	11	55	C	missense_variant	MODERATE	jmjd-1.1	WBGene00005013	transcript	F43G6.6	protein_coding
II	11807317	T	[A]	{A, T}	0.212121	1	TRUE	FALSE	FALSE	0.336803	66	0	14	52	A	missense_variant	MODERATE	jmjd-1.1	WBGene00005013	transcript	F43G6.6	protein_coding
II	11807347	G	[A]	{G, A}	0.166667	1	TRUE	FALSE	TRUE	0.279898	66	0	11	55	A	missense_variant	MODERATE	jmjd-1.1	WBGene00005013	transcript	F43G6.6	protein_coding
II	11807454	T	[C]	{C, T}	0.893939	1	TRUE	FALSE	TRUE	0.191071	66	0	59	7	C	missense_variant	MODERATE	jmjd-1.1	WBGene00005013	transcript	F43G6.6	protein_coding
II	11807464	C	[T]	{C, T}	0.484848	1	TRUE	FALSE	TRUE	0.503354	66	0	32	34	T	missense_variant	MODERATE	jmjd-1.1	WBGene00005013	transcript	F43G6.6	protein_coding
II	11807503	T	[C]	{C, T}	0.575758	1	TRUE	FALSE	TRUE	0.492251	66	0	38	28	C	missense_variant	MODERATE	jmjd-1.1	WBGene00005013	transcript	F43G6.6	protein_coding
II	11807575	T	[G]	{G, T}	0.0151515	1	TRUE	FALSE	FALSE	0.0300717	66	0	1	65	G	missense_variant	MODERATE	jmjd-1.1	WBGene00005013	transcript	F43G6.6	protein_coding
II	11807742	T	[G]	{G, T}	0.0151515	1	TRUE	FALSE	FALSE	0.0300717	66	0	1	65	G	missense_variant	MODERATE	jmjd-1.1	WBGene00005013	transcript	F43G6.6	protein_coding
II	11807784	G	[C]	{C, G}	0.0757576	1	TRUE	FALSE	FALSE	0.141106	66	0	5	61	C	missense_variant	MODERATE	jmjd-1.1	WBGene00005013	transcript	F43G6.6	protein_coding
II	11807790	G	[A]	{G, A}	0.0151515	1	TRUE	FALSE	TRUE	0.0300717	66	0	1	65	A	missense_variant	MODERATE	jmjd-1.1	WBGene00005013	transcript	F43G6.6	protein_coding
II	11807817	G	[A]	{G, A}	0.0151515	1	TRUE	FALSE	TRUE	0.0300717	66	0	1	65	A	missense_variant	MODERATE	jmjd-1.1	WBGene00005013	transcript	F43G6.6	protein_coding
II	11807846	C	[A]	{C, A}	0.0151515	1	TRUE	FALSE	FALSE	0.0300717	66	0	1	65	A	missense_variant	MODERATE	jmjd-1.1	WBGene00005013	transcript	F43G6.6	protein_coding
II	11807958	T	[C]	{C, T}	0.575758	1	TRUE	FALSE	TRUE	0.492251	66	0	38	28	C	missense_variant	MODERATE	jmjd-1.1	WBGene00005013	transcript	F43G6.6	protein_coding
II	11807972	C	[A]	{C, A}	0.212121	1	TRUE	FALSE	FALSE	0.336803	66	0	14	52	A	missense_variant	MODERATE	jmjd-1.1	WBGene00005013	transcript	F43G6.6	protein_coding
II	11808150	T	[A]	{A, T}	0.212121	1	TRUE	FALSE	FALSE	0.336803	66	0	14	52	A	missense_variant	MODERATE	jmjd-1.1	WBGene00005013	transcript	F43G6.6	protein_coding
II	11808207	A	[G]	{G, A}	0.212121	1	TRUE	FALSE	TRUE	0.336803	66	0	14	52	G	missense_variant	MODERATE	jmjd-1.1	WBGene00005013	transcript	F43G6.6	protein_coding
II	11808222	A	[T]	{A, T}	0.212121	1	TRUE	FALSE	FALSE	0.336803	66	0	14	52	T	missense_variant	MODERATE	jmjd-1.1	WBGene00005013	transcript	F43G6.6	protein_coding
II	11808261	T	[A]	{A, T}	0.212121	1	TRUE	FALSE	FALSE	0.336803	66	0	14	52	A	missense_variant	MODERATE	jmjd-1.1	WBGene00005013	transcript	F43G6.6	protein_coding
II	11808431	A	[T]	{A, T}	0.0606061	1	TRUE	FALSE	FALSE	0.114735	66	0	4	62	T	missense_variant	MODERATE	jmjd-1.1	WBGene00005013	transcript	F43G6.6	protein_coding
II	11808469	T	[G]	{G, T}	0.212121	1	TRUE	FALSE	FALSE	0.336803	66	0	14	52	G	missense_variant	MODERATE	jmjd-1.1	WBGene00005013	transcript	F43G6.6	protein_coding
II	11808515	A	[T]	{A, T}	0.166667	1	TRUE	FALSE	FALSE	0.279898	66	0	11	55	T	missense_variant	MODERATE	jmjd-1.1	WBGene00005013	transcript	F43G6.6	protein_coding
II	11808542	G	[A]	{G, A}	0.0151515	1	TRUE	FALSE	TRUE	0.0300717	66	0	1	65	A	missense_variant	MODERATE	jmjd-1.1	WBGene00005013	transcript	F43G6.6	protein_coding
II	11808545	A	[G]	{G, A}	0.0151515	1	TRUE	FALSE	TRUE	0.0300717	66	0	1	65	G	missense_variant	MODERATE	jmjd-1.1	WBGene00005013	transcript	F43G6.6	protein_coding
II	11808547	C	[A]	{C, A}	0.893939	1	TRUE	FALSE	FALSE	0.191071	66	0	59	7	A	missense_variant	MODERATE	jmjd-1.1	WBGene00005013	transcript	F43G6.6	protein_coding
II	11809377	G	[A]	{G, A}	0.151515	1	TRUE	FALSE	TRUE	0.259079	66	0	10	56	A	missense_variant	MODERATE	F43G6.10	WBGene00009662	transcript	F43G6.10	protein_coding
II	11809404	A	[G]	{G, A}	0.0757576	1	TRUE	FALSE	TRUE	0.141106	66	0	5	61	G	missense_variant	MODERATE	F43G6.10	WBGene00009662	transcript	F43G6.10	protein_coding
II	11809466	C	[T]	{C, T}	0.030303	1	TRUE	FALSE	TRUE	0.0592181	66	0	2	64	T	missense_variant	MODERATE	F43G6.10	WBGene00009662	transcript	F43G6.10	protein_coding
II	11810088	G	[C]	{C, G}	0.212121	1	TRUE	FALSE	FALSE	0.336803	66	0	14	52	C	missense_variant	MODERATE	F43G6.10	WBGene00009662	transcript	F43G6.10	protein_coding
II	11810153	G	[A]	{G, A}	0.166667	1	TRUE	FALSE	TRUE	0.279898	66	0	11	55	A	missense_variant	MODERATE	F43G6.10	WBGene00009662	transcript	F43G6.10	protein_coding
II	11810171	C	[T]	{C, T}	0.212121	1	TRUE	FALSE	TRUE	0.336803	66	0	14	52	T	missense_variant	MODERATE	F43G6.10	WBGene00009662	transcript	F43G6.10	protein_coding
II	11811462	C	[A]	{C, A}	0.0625	1	TRUE	FALSE	FALSE	0.11811	64	0	4	60	A	missense_variant	MODERATE	F43G6.7	WBGene00009659	transcript	F43G6.7	protein_coding
II	11811487	C	[T]	{C, T}	0.03125	1	TRUE	FALSE	TRUE	0.0610236	64	0	2	62	T	missense_variant	MODERATE	F43G6.7	WBGene00009659	transcript	F43G6.7	protein_coding
II	11811493	C	[A]	{C, A}	0.0625	1	TRUE	FALSE	FALSE	0.11811	64	0	4	60	A	missense_variant	MODERATE	F43G6.7	WBGene00009659	transcript	F43G6.7	protein_coding
II	11811504	C	[T]	{C, T}	0.0625	1	TRUE	FALSE	TRUE	0.11811	64	0	4	60	T	missense_variant	MODERATE	F43G6.7	WBGene00009659	transcript	F43G6.7	protein_coding
II	11812655	G	[T]	{G, T}	0.166667	1	TRUE	FALSE	FALSE	0.279898	66	0	11	55	T	missense_variant	MODERATE	F43G6.8	WBGene00009660	transcript	F43G6.8	protein_coding
II	11815035	C	[T]	{C, T}	0.0454545	1	TRUE	FALSE	TRUE	0.0874393	66	0	3	63	T	missense_variant	MODERATE	F43G6.5	WBGene00009658	transcript	F43G6.5	protein_coding
II	11815104	T	[A]	{A, T}	0.0606061	1	TRUE	FALSE	FALSE	0.114735	66	0	4	62	A	missense_variant	MODERATE	F43G6.5	WBGene00009658	transcript	F43G6.5	protein_coding
II	11815144	C	[G]	{C, G}	0.030303	1	TRUE	FALSE	FALSE	0.0592181	66	0	2	64	G	missense_variant	MODERATE	F43G6.5	WBGene00009658	transcript	F43G6.5	protein_coding
II	11815171	T	[G]	{G, T}	0.0606061	1	TRUE	FALSE	FALSE	0.114735	66	0	4	62	G	missense_variant	MODERATE	F43G6.5	WBGene00009658	transcript	F43G6.5	protein_coding
II	11815304	G	[C]	{C, G}	0.166667	1	TRUE	FALSE	FALSE	0.279898	66	0	11	55	C	missense_variant	MODERATE	F43G6.5	WBGene00009658	transcript	F43G6.5	protein_coding
II	11815965	A	[G]	{G, A}	0.0757576	1	TRUE	FALSE	TRUE	0.141106	66	0	5	61	G	missense_variant	MODERATE	F43G6.5	WBGene00009658	transcript	F43G6.5	protein_coding
II	11816140	C	[T]	{C, T}	0.215385	1	TRUE	FALSE	TRUE	0.340608	65	0	14	51	T	missense_variant	MODERATE	F43G6.5	WBGene00009658	transcript	F43G6.5	protein_coding
II	11818393	T	[C]	{C, T}	0.0151515	1	TRUE	FALSE	TRUE	0.0300717	66	0	1	65	C	missense_variant	MODERATE	Y6D1A.2	WBGene00012396	transcript	Y6D1A.2	protein_coding
II	11818710	T	[C]	{C, T}	0.0757576	1	TRUE	FALSE	TRUE	0.141106	66	0	5	61	C	missense_variant	MODERATE	Y6D1A.2	WBGene00012396	transcript	Y6D1A.2	protein_coding
II	11818749	C	[A]	{C, A}	0.030303	1	TRUE	FALSE	FALSE	0.0592181	66	0	2	64	A	missense_variant	MODERATE	Y6D1A.2	WBGene00012396	transcript	Y6D1A.2	protein_coding
II	11818831	C	[A]	{C, A}	0.0151515	1	TRUE	FALSE	FALSE	0.0300717	66	0	1	65	A	missense_variant	MODERATE	Y6D1A.2	WBGene00012396	transcript	Y6D1A.2	protein_coding
II	11819719	G	[A]	{G, A}	0.0151515	1	TRUE	FALSE	TRUE	0.0300717	66	0	1	65	A	missense_variant&splice_region_variant	MODERATE	Y6D1A.2	WBGene00012396	transcript	Y6D1A.2	protein_coding
II	11821597	G	[A]	{G, A}	0.0151515	1	TRUE	FALSE	TRUE	0.0300717	66	0	1	65	A	missense_variant	MODERATE	Y6D1A.1	WBGene00012395	transcript	Y6D1A.1	protein_coding
II	11821730	C	[T]	{C, T}	0.030303	1	TRUE	FALSE	TRUE	0.0592181	66	0	2	64	T	missense_variant	MODERATE	Y6D1A.1	WBGene00012395	transcript	Y6D1A.1	protein_coding
II	11822018	C	[T]	{C, T}	0.181818	1	TRUE	FALSE	TRUE	0.299792	66	0	12	54	T	missense_variant	MODERATE	Y6D1A.1	WBGene00012395	transcript	Y6D1A.1	protein_coding
II	11822031	GCGATCTCTTCTC	[G]	{G, GCGATCTCTTCTC}	0.0151515	1	FALSE	TRUE	FALSE	0.0300717	66	0	1	65	G	disruptive_inframe_deletion	MODERATE	Y6D1A.1	WBGene00012395	transcript	Y6D1A.1	protein_coding
II	11822032	CGATCTCTTCTCT	[C]	{CGATCTCTTCTCT, C}	0.0530303	1	FALSE	TRUE	FALSE	0.101203	66	1	3	62	C	disruptive_inframe_deletion	MODERATE	Y6D1A.1	WBGene00012395	transcript	Y6D1A.1	protein_coding
II	11822098	C	[T]	{C, T}	0.0151515	1	TRUE	FALSE	TRUE	0.0300717	66	0	1	65	T	missense_variant	MODERATE	Y6D1A.1	WBGene00012395	transcript	Y6D1A.1	protein_coding
II	11822195	T	[C]	{C, T}	0.151515	1	TRUE	FALSE	TRUE	0.259079	66	0	10	56	C	missense_variant	MODERATE	Y6D1A.1	WBGene00012395	transcript	Y6D1A.1	protein_coding
II	11822216	T	[C]	{C, T}	0.0757576	1	TRUE	FALSE	TRUE	0.141106	66	0	5	61	C	missense_variant	MODERATE	Y6D1A.1	WBGene00012395	transcript	Y6D1A.1	protein_coding
II	11822257	G	[A]	{G, A}	0.0454545	1	TRUE	FALSE	TRUE	0.0874393	66	0	3	63	A	missense_variant	MODERATE	Y6D1A.1	WBGene00012395	transcript	Y6D1A.1	protein_coding
II	11822296	T	[A]	{A, T}	0.0606061	1	TRUE	FALSE	FALSE	0.114735	66	0	4	62	A	missense_variant	MODERATE	Y6D1A.1	WBGene00012395	transcript	Y6D1A.1	protein_coding
II	11822322	G	[T]	{G, T}	0.0151515	1	TRUE	FALSE	FALSE	0.0300717	66	0	1	65	T	missense_variant	MODERATE	Y6D1A.1	WBGene00012395	transcript	Y6D1A.1	protein_coding
II	11822464	G	[A]	{G, A}	0.0606061	1	TRUE	FALSE	TRUE	0.114735	66	0	4	62	A	missense_variant	MODERATE	Y6D1A.1	WBGene00012395	transcript	Y6D1A.1	protein_coding
II	11822532	T	[C]	{C, T}	0.166667	1	TRUE	FALSE	TRUE	0.279898	66	0	11	55	C	missense_variant	MODERATE	Y6D1A.1	WBGene00012395	transcript	Y6D1A.1	protein_coding
II	11822968	A	[T]	{A, T}	0.0606061	1	TRUE	FALSE	FALSE	0.114735	66	0	4	62	T	missense_variant	MODERATE	Y6D1A.1	WBGene00012395	transcript	Y6D1A.1	protein_coding
II	11823083	C	[T]	{C, T}	0.030303	1	TRUE	FALSE	TRUE	0.0592181	66	0	2	64	T	missense_variant	MODERATE	Y6D1A.1	WBGene00012395	transcript	Y6D1A.1	protein_coding
II	11823498	C	[T]	{C, T}	0.0151515	1	TRUE	FALSE	TRUE	0.0300717	66	0	1	65	T	missense_variant	MODERATE	Y6D1A.1	WBGene00012395	transcript	Y6D1A.1	protein_coding
II	11823502	C	[A]	{C, A}	0.0151515	1	TRUE	FALSE	FALSE	0.0300717	66	0	1	65	A	missense_variant	MODERATE	Y6D1A.1	WBGene00012395	transcript	Y6D1A.1	protein_coding
II	11823590	G	[A]	{G, A}	0.166667	1	TRUE	FALSE	TRUE	0.279898	66	0	11	55	A	missense_variant	MODERATE	Y6D1A.1	WBGene00012395	transcript	Y6D1A.1	protein_coding
II	11823597	T	[A]	{A, T}	0.166667	1	TRUE	FALSE	FALSE	0.279898	66	0	11	55	A	missense_variant	MODERATE	Y6D1A.1	WBGene00012395	transcript	Y6D1A.1	protein_coding
II	11828077	G	[A]	{G, A}	0.227273	1	TRUE	FALSE	TRUE	0.353921	66	0	15	51	A	missense_variant	MODERATE	pes-5	WBGene00003979	transcript	T27D12.4a	protein_coding
II	11828334	G	[T]	{G, T}	0.030303	1	TRUE	FALSE	FALSE	0.0592181	66	0	2	64	T	missense_variant	MODERATE	pes-5	WBGene00003979	transcript	T27D12.4a	protein_coding
II	11828692	T	[C]	{C, T}	0.166667	1	TRUE	FALSE	TRUE	0.279898	66	0	11	55	C	missense_variant	MODERATE	pes-5	WBGene00003979	transcript	T27D12.4a	protein_coding
II	11828964	C	[A]	{C, A}	0.030303	1	TRUE	FALSE	FALSE	0.0592181	66	0	2	64	A	missense_variant	MODERATE	pes-5	WBGene00003979	transcript	T27D12.4a	protein_coding
II	11829015	C	[T]	{C, T}	0.0757576	1	TRUE	FALSE	TRUE	0.141106	66	0	5	61	T	missense_variant	MODERATE	pes-5	WBGene00003979	transcript	T27D12.4a	protein_coding
II	11829058	G	[A]	{G, A}	0.166667	1	TRUE	FALSE	TRUE	0.279898	66	0	11	55	A	missense_variant	MODERATE	pes-5	WBGene00003979	transcript	T27D12.4a	protein_coding
II	11829086	C	[G]	{C, G}	0.227273	1	TRUE	FALSE	FALSE	0.353921	66	0	15	51	G	missense_variant	MODERATE	pes-5	WBGene00003979	transcript	T27D12.4a	protein_coding
II	11829096	G	[A]	{G, A}	0.742424	1	TRUE	FALSE	TRUE	0.385381	66	0	49	17	A	missense_variant	MODERATE	pes-5	WBGene00003979	transcript	T27D12.4a	protein_coding
II	11829169	T	[C]	{C, T}	0.151515	1	TRUE	FALSE	TRUE	0.259079	66	0	10	56	C	missense_variant	MODERATE	pes-5	WBGene00003979	transcript	T27D12.4a	protein_coding
II	11829234	A	[T]	{A, T}	0.227273	1	TRUE	FALSE	FALSE	0.353921	66	0	15	51	T	missense_variant	MODERATE	pes-5	WBGene00003979	transcript	T27D12.4a	protein_coding
II	11829285	C	[T]	{C, T}	0.0151515	1	TRUE	FALSE	TRUE	0.0300717	66	0	1	65	T	missense_variant	MODERATE	pes-5	WBGene00003979	transcript	T27D12.4a	protein_coding
II	11829292	T	[C]	{C, T}	0.742424	1	TRUE	FALSE	TRUE	0.385381	66	0	49	17	C	missense_variant	MODERATE	pes-5	WBGene00003979	transcript	T27D12.4a	protein_coding
II	11829355	A	[T]	{A, T}	0.712121	1	TRUE	FALSE	FALSE	0.413139	66	0	47	19	T	missense_variant	MODERATE	pes-5	WBGene00003979	transcript	T27D12.4a	protein_coding
II	11829489	T	[C]	{C, T}	0.893939	1	TRUE	FALSE	TRUE	0.191071	66	0	59	7	C	missense_variant	MODERATE	pes-5	WBGene00003979	transcript	T27D12.4a	protein_coding
II	11829989	C	[T]	{C, T}	0.030303	1	TRUE	FALSE	TRUE	0.0592181	66	0	2	64	T	missense_variant	MODERATE	pes-5	WBGene00003979	transcript	T27D12.4a	protein_coding
II	11831669	T	[C]	{C, T}	0.0757576	1	TRUE	FALSE	TRUE	0.141106	66	0	5	61	C	missense_variant	MODERATE	clec-144	WBGene00012086	transcript	T27D12.3	protein_coding
II	11831928	A	[T]	{A, T}	0.0757576	1	TRUE	FALSE	FALSE	0.141106	66	0	5	61	T	missense_variant	MODERATE	clec-144	WBGene00012086	transcript	T27D12.3	protein_coding
II	11831929	T	[A]	{A, T}	0.0757576	1	TRUE	FALSE	FALSE	0.141106	66	0	5	61	A	missense_variant	MODERATE	clec-144	WBGene00012086	transcript	T27D12.3	protein_coding
II	11832008	C	[G]	{C, G}	0.0151515	1	TRUE	FALSE	FALSE	0.0300717	66	0	1	65	G	missense_variant	MODERATE	clec-144	WBGene00012086	transcript	T27D12.3	protein_coding
II	11832243	T	[G]	{G, T}	0.0757576	1	TRUE	FALSE	FALSE	0.141106	66	0	5	61	G	missense_variant	MODERATE	clec-144	WBGene00012086	transcript	T27D12.3	protein_coding
II	11832563	T	[A]	{A, T}	0.0454545	1	TRUE	FALSE	FALSE	0.0874393	66	0	3	63	A	missense_variant	MODERATE	clec-144	WBGene00012086	transcript	T27D12.3	protein_coding
II	11845235	G	[C]	{C, G}	0.121212	1	TRUE	FALSE	FALSE	0.214666	66	0	8	58	C	missense_variant	MODERATE	T27D12.1	WBGene00012085	transcript	T27D12.1b	protein_coding
II	11848552	A	[C]	{C, A}	0.0151515	1	TRUE	FALSE	FALSE	0.0300717	66	0	1	65	C	missense_variant	MODERATE	clh-1	WBGene00000528	transcript	T27D12.2a	protein_coding
II	11851241	C	[T]	{C, T}	0.0151515	1	TRUE	FALSE	TRUE	0.0300717	66	0	1	65	T	missense_variant	MODERATE	clh-1	WBGene00000528	transcript	T27D12.2a	protein_coding
II	11861397	A	[G]	{G, A}	0.0151515	1	TRUE	FALSE	TRUE	0.0300717	66	0	1	65	G	missense_variant	MODERATE	K12D12.5	WBGene00010787	transcript	K12D12.5	protein_coding
II	11861598	C	[A]	{C, A}	0.0151515	1	TRUE	FALSE	FALSE	0.0300717	66	0	1	65	A	missense_variant	MODERATE	K12D12.5	WBGene00010787	transcript	K12D12.5	protein_coding
II	11862183	C	[T]	{C, T}	0.030303	1	TRUE	FALSE	TRUE	0.0592181	66	0	2	64	T	missense_variant	MODERATE	K12D12.5	WBGene00010787	transcript	K12D12.5	protein_coding
II	11862211	C	[A]	{C, A}	0.0757576	1	TRUE	FALSE	FALSE	0.141106	66	0	5	61	A	missense_variant	MODERATE	K12D12.5	WBGene00010787	transcript	K12D12.5	protein_coding
II	11862239	C	[A]	{C, A}	0.0151515	1	TRUE	FALSE	FALSE	0.0300717	66	0	1	65	A	missense_variant	MODERATE	K12D12.5	WBGene00010787	transcript	K12D12.5	protein_coding
II	11862307	A	[C]	{C, A}	0.166667	1	TRUE	FALSE	FALSE	0.279898	66	0	11	55	C	missense_variant	MODERATE	K12D12.5	WBGene00010787	transcript	K12D12.5	protein_coding
II	11862326	G	[A]	{G, A}	0.030303	1	TRUE	FALSE	TRUE	0.0592181	66	0	2	64	A	missense_variant	MODERATE	K12D12.5	WBGene00010787	transcript	K12D12.5	protein_coding
II	11862604	G	[A]	{G, A}	0.0454545	1	TRUE	FALSE	TRUE	0.0874393	66	0	3	63	A	missense_variant	MODERATE	K12D12.5	WBGene00010787	transcript	K12D12.5	protein_coding
II	11862742	A	[G]	{G, A}	0.0151515	1	TRUE	FALSE	TRUE	0.0300717	66	0	1	65	G	missense_variant	MODERATE	K12D12.5	WBGene00010787	transcript	K12D12.5	protein_coding
II	11862766	C	[T]	{C, T}	0.0151515	1	TRUE	FALSE	TRUE	0.0300717	66	0	1	65	T	missense_variant	MODERATE	K12D12.5	WBGene00010787	transcript	K12D12.5	protein_coding
II	11862851	C	[T]	{C, T}	0.0151515	1	TRUE	FALSE	TRUE	0.0300717	66	0	1	65	T	missense_variant	MODERATE	K12D12.5	WBGene00010787	transcript	K12D12.5	protein_coding
II	11863279	G	[A]	{G, A}	0.0454545	1	TRUE	FALSE	TRUE	0.0874393	66	0	3	63	A	missense_variant	MODERATE	K12D12.5	WBGene00010787	transcript	K12D12.5	protein_coding
II	11863749	C	[A]	{C, A}	0.169231	1	TRUE	FALSE	FALSE	0.283363	65	0	11	54	A	missense_variant	MODERATE	K12D12.4	WBGene00010786	transcript	K12D12.4	protein_coding
II	11863786	CCTT	[C]	{C, CCTT}	0.0461538	1	FALSE	TRUE	FALSE	0.0887299	65	0	3	62	C	conservative_inframe_deletion	MODERATE	K12D12.4	WBGene00010786	transcript	K12D12.4	protein_coding
II	11863919	C	[T]	{C, T}	0.0606061	1	TRUE	FALSE	TRUE	0.114735	66	0	4	62	T	missense_variant	MODERATE	K12D12.4	WBGene00010786	transcript	K12D12.4	protein_coding
II	11863936	A	[G]	{G, A}	0.0151515	1	TRUE	FALSE	TRUE	0.0300717	66	0	1	65	G	missense_variant	MODERATE	K12D12.4	WBGene00010786	transcript	K12D12.4	protein_coding
II	11864021	A	[T]	{A, T}	0.0757576	1	TRUE	FALSE	FALSE	0.141106	66	0	5	61	T	missense_variant	MODERATE	K12D12.4	WBGene00010786	transcript	K12D12.4	protein_coding
II	11864318	T	[C]	{C, T}	0.0757576	1	TRUE	FALSE	TRUE	0.141106	66	0	5	61	C	missense_variant	MODERATE	K12D12.4	WBGene00010786	transcript	K12D12.4	protein_coding
II	11864743	C	[T]	{C, T}	0.0757576	1	TRUE	FALSE	TRUE	0.141106	66	0	5	61	T	missense_variant	MODERATE	K12D12.4	WBGene00010786	transcript	K12D12.4	protein_coding
II	11864922	G	[A]	{G, A}	0.0151515	1	TRUE	FALSE	TRUE	0.0300717	66	0	1	65	A	missense_variant	MODERATE	K12D12.4	WBGene00010786	transcript	K12D12.4	protein_coding
II	11864923	G	[A]	{G, A}	0.0151515	1	TRUE	FALSE	TRUE	0.0300717	66	0	1	65	A	missense_variant	MODERATE	K12D12.4	WBGene00010786	transcript	K12D12.4	protein_coding
II	11865328	A	[T]	{A, T}	0.0757576	1	TRUE	FALSE	FALSE	0.141106	66	0	5	61	T	missense_variant	MODERATE	K12D12.4	WBGene00010786	transcript	K12D12.4	protein_coding
II	11868867	C	[A]	{C, A}	0.0909091	1	TRUE	FALSE	FALSE	0.166551	66	0	6	60	A	missense_variant	MODERATE	col-84	WBGene00000659	transcript	K12D12.3	protein_coding
II	11869352	A	[T]	{A, T}	0.166667	1	TRUE	FALSE	FALSE	0.279898	66	0	11	55	T	missense_variant	MODERATE	col-84	WBGene00000659	transcript	K12D12.3	protein_coding
II	11869576	A	[G]	{G, A}	0.893939	1	TRUE	FALSE	TRUE	0.191071	66	0	59	7	G	missense_variant	MODERATE	col-84	WBGene00000659	transcript	K12D12.3	protein_coding
II	11869590	A	[G]	{G, A}	0.348485	1	TRUE	FALSE	TRUE	0.457553	66	0	23	43	G	missense_variant	MODERATE	col-84	WBGene00000659	transcript	K12D12.3	protein_coding
II	11869709	A	[G]	{G, A}	0.0757576	1	TRUE	FALSE	TRUE	0.141106	66	0	5	61	G	missense_variant	MODERATE	npp-3	WBGene00003789	transcript	K12D12.2.1	protein_coding
II	11870265	T	[G]	{G, T}	0.348485	1	TRUE	FALSE	FALSE	0.457553	66	0	23	43	G	missense_variant	MODERATE	npp-3	WBGene00003789	transcript	K12D12.2.1	protein_coding
II	11870316	C	[T]	{C, T}	0.0151515	1	TRUE	FALSE	TRUE	0.0300717	66	0	1	65	T	missense_variant	MODERATE	npp-3	WBGene00003789	transcript	K12D12.2.1	protein_coding
II	11870346	T	[G]	{G, T}	0.0151515	1	TRUE	FALSE	FALSE	0.0300717	66	0	1	65	G	missense_variant	MODERATE	npp-3	WBGene00003789	transcript	K12D12.2.1	protein_coding
II	11870740	C	[T]	{C, T}	0.153846	1	TRUE	FALSE	TRUE	0.262373	65	0	10	55	T	missense_variant	MODERATE	npp-3	WBGene00003789	transcript	K12D12.2.1	protein_coding
II	11872009	C	[T]	{C, T}	0.0333333	1	TRUE	FALSE	TRUE	0.064986	60	0	2	58	T	missense_variant	MODERATE	npp-3	WBGene00003789	transcript	K12D12.2.1	protein_coding
II	11872440	C	[A]	{C, A}	0.403226	1	TRUE	FALSE	FALSE	0.485182	62	0	25	37	A	missense_variant	MODERATE	npp-3	WBGene00003789	transcript	K12D12.2.1	protein_coding
II	11872565	C	[A]	{C, A}	0.0645161	1	TRUE	FALSE	FALSE	0.121689	62	0	4	58	A	missense_variant	MODERATE	npp-3	WBGene00003789	transcript	K12D12.2.1	protein_coding
II	11873260	T	[C]	{C, T}	0.0806452	1	TRUE	FALSE	TRUE	0.149489	62	0	5	57	C	missense_variant	MODERATE	npp-3	WBGene00003789	transcript	K12D12.2.1	protein_coding
II	11873894	A	[G]	{G, A}	0.177419	1	TRUE	FALSE	TRUE	0.294256	62	0	11	51	G	missense_variant	MODERATE	npp-3	WBGene00003789	transcript	K12D12.2.1	protein_coding
II	11873954	C	[T]	{C, T}	0.166667	1	TRUE	FALSE	TRUE	0.279898	66	0	11	55	T	missense_variant	MODERATE	npp-3	WBGene00003789	transcript	K12D12.2.1	protein_coding
II	11874376	C	[A]	{C, A}	0.0757576	1	TRUE	FALSE	FALSE	0.141106	66	0	5	61	A	missense_variant	MODERATE	npp-3	WBGene00003789	transcript	K12D12.2.1	protein_coding
II	11874656	A	[G]	{G, A}	0.0757576	1	TRUE	FALSE	TRUE	0.141106	66	0	5	61	G	missense_variant	MODERATE	npp-3	WBGene00003789	transcript	K12D12.2.1	protein_coding
II	11875177	A	[C]	{C, A}	0.69697	1	TRUE	FALSE	FALSE	0.42563	66	0	46	20	C	missense_variant	MODERATE	top-2	WBGene00010785	transcript	K12D12.1	protein_coding
II	11875199	A	[AAGG]	{AAGG, A}	0.030303	1	FALSE	TRUE	FALSE	0.0592181	66	0	2	64	AAGG	conservative_inframe_insertion	MODERATE	top-2	WBGene00010785	transcript	K12D12.1	protein_coding
II	11875200	A	[AGGC]	{A, AGGC}	0.727273	1	FALSE	TRUE	FALSE	0.399722	66	0	48	18	AGGC	conservative_inframe_insertion	MODERATE	top-2	WBGene00010785	transcript	K12D12.1	protein_coding
II	11877068	A	[G]	{G, A}	0.0757576	1	TRUE	FALSE	TRUE	0.141106	66	0	5	61	G	missense_variant	MODERATE	top-2	WBGene00010785	transcript	K12D12.1	protein_coding
II	11877362	C	[A]	{C, A}	0.0151515	1	TRUE	FALSE	FALSE	0.0300717	66	0	1	65	A	missense_variant	MODERATE	top-2	WBGene00010785	transcript	K12D12.1	protein_coding
II	11878040	C	[A]	{C, A}	0.378788	1	TRUE	FALSE	FALSE	0.474208	66	0	25	41	A	missense_variant	MODERATE	top-2	WBGene00010785	transcript	K12D12.1	protein_coding
II	11878041	A	[T]	{A, T}	0.378788	1	TRUE	FALSE	FALSE	0.474208	66	0	25	41	T	missense_variant	MODERATE	top-2	WBGene00010785	transcript	K12D12.1	protein_coding
II	11878700	C	[A]	{C, A}	0.0151515	1	TRUE	FALSE	FALSE	0.0300717	66	0	1	65	A	missense_variant	MODERATE	top-2	WBGene00010785	transcript	K12D12.1	protein_coding
II	11879132	T	[A]	{A, T}	0.0151515	1	TRUE	FALSE	FALSE	0.0300717	66	0	1	65	A	missense_variant	MODERATE	top-2	WBGene00010785	transcript	K12D12.1	protein_coding
II	11879301	A	[C]	{C, A}	0.393939	1	TRUE	FALSE	FALSE	0.481147	66	0	26	40	C	missense_variant	MODERATE	top-2	WBGene00010785	transcript	K12D12.1	protein_coding
II	11879436	T	[C]	{C, T}	0.166667	1	TRUE	FALSE	TRUE	0.279898	66	0	11	55	C	missense_variant	MODERATE	top-2	WBGene00010785	transcript	K12D12.1	protein_coding
II	11879755	A	[T]	{A, T}	0.0757576	1	TRUE	FALSE	FALSE	0.141106	66	0	5	61	T	missense_variant&splice_region_variant	MODERATE	top-2	WBGene00010785	transcript	K12D12.1	protein_coding
II	11879858	G	[A]	{G, A}	0.378788	1	TRUE	FALSE	TRUE	0.474208	66	0	25	41	A	missense_variant	MODERATE	top-2	WBGene00010785	transcript	K12D12.1	protein_coding
II	11879912	G	[A]	{G, A}	0.0606061	1	TRUE	FALSE	TRUE	0.114735	66	0	4	62	A	missense_variant	MODERATE	top-2	WBGene00010785	transcript	K12D12.1	protein_coding
II	11879955	G	[A]	{G, A}	0.318182	1	TRUE	FALSE	TRUE	0.437196	66	0	21	45	A	missense_variant	MODERATE	top-2	WBGene00010785	transcript	K12D12.1	protein_coding
II	11880033	C	[A]	{C, A}	0.0151515	1	TRUE	FALSE	FALSE	0.0300717	66	0	1	65	A	missense_variant	MODERATE	top-2	WBGene00010785	transcript	K12D12.1	protein_coding
II	11880051	A	[C]	{C, A}	0.0151515	1	TRUE	FALSE	FALSE	0.0300717	66	0	1	65	C	missense_variant	MODERATE	top-2	WBGene00010785	transcript	K12D12.1	protein_coding
II	11880266	A	[G]	{G, A}	0.0151515	1	TRUE	FALSE	TRUE	0.0300717	66	0	1	65	G	missense_variant	MODERATE	top-2	WBGene00010785	transcript	K12D12.1	protein_coding
II	11882662	T	[A]	{A, T}	0.384615	1	TRUE	FALSE	FALSE	0.477042	65	0	25	40	A	missense_variant	MODERATE	ZK930.5	WBGene00014155	transcript	ZK930.5	protein_coding
II	11882839	C	[T]	{C, T}	0.0153846	1	TRUE	FALSE	TRUE	0.0305307	65	0	1	64	T	missense_variant	MODERATE	ZK930.5	WBGene00014155	transcript	ZK930.5	protein_coding
II	11882992	C	[A]	{C, A}	0.378788	1	TRUE	FALSE	FALSE	0.474208	66	0	25	41	A	missense_variant	MODERATE	ZK930.5	WBGene00014155	transcript	ZK930.5	protein_coding
II	11883024	G	[A]	{G, A}	0.0151515	1	TRUE	FALSE	TRUE	0.0300717	66	0	1	65	A	missense_variant	MODERATE	ZK930.5	WBGene00014155	transcript	ZK930.5	protein_coding
II	11883126	G	[A]	{G, A}	0.0606061	1	TRUE	FALSE	TRUE	0.114735	66	0	4	62	A	missense_variant	MODERATE	ZK930.5	WBGene00014155	transcript	ZK930.5	protein_coding
II	11883134	C	[A]	{C, A}	0.0151515	1	TRUE	FALSE	FALSE	0.0300717	66	0	1	65	A	missense_variant	MODERATE	ZK930.5	WBGene00014155	transcript	ZK930.5	protein_coding
II	11883351	T	[C]	{C, T}	0.030303	1	TRUE	FALSE	TRUE	0.0592181	66	0	2	64	C	missense_variant	MODERATE	ZK930.5	WBGene00014155	transcript	ZK930.5	protein_coding
II	11883368	A	[G]	{G, A}	0.0151515	1	TRUE	FALSE	TRUE	0.0300717	66	0	1	65	G	missense_variant	MODERATE	ZK930.5	WBGene00014155	transcript	ZK930.5	protein_coding
II	11883423	C	[T]	{C, T}	0.0151515	1	TRUE	FALSE	TRUE	0.0300717	66	0	1	65	T	missense_variant	MODERATE	ZK930.5	WBGene00014155	transcript	ZK930.5	protein_coding
II	11885789	T	[A]	{A, T}	0.377049	1	TRUE	FALSE	FALSE	0.473649	61	0	23	38	A	missense_variant	MODERATE	ZK930.6	WBGene00014156	transcript	ZK930.6	protein_coding
II	11885893	C	[A]	{C, A}	0.015625	1	TRUE	FALSE	FALSE	0.0310039	64	0	1	63	A	missense_variant	MODERATE	ZK930.6	WBGene00014156	transcript	ZK930.6	protein_coding
II	11891863	T	[C]	{C, T}	0.166667	1	TRUE	FALSE	TRUE	0.279898	66	0	11	55	C	missense_variant	MODERATE	ZK930.2	WBGene00014152	transcript	ZK930.2	protein_coding
II	11892871	T	[C]	{C, T}	0.166667	1	TRUE	FALSE	TRUE	0.279898	66	0	11	55	C	missense_variant	MODERATE	ZK930.2	WBGene00014152	transcript	ZK930.2	protein_coding
II	11892895	G	[A]	{G, A}	0.0151515	1	TRUE	FALSE	TRUE	0.0300717	66	0	1	65	A	missense_variant	MODERATE	ZK930.2	WBGene00014152	transcript	ZK930.2	protein_coding
II	11893367	A	[C]	{C, A}	0.0606061	1	TRUE	FALSE	FALSE	0.114735	66	0	4	62	C	missense_variant	MODERATE	ZK930.2	WBGene00014152	transcript	ZK930.2	protein_coding
II	11898186	G	[A]	{G, A}	0.166667	1	TRUE	FALSE	TRUE	0.279898	66	0	11	55	A	missense_variant	MODERATE	vab-23	WBGene00014153	transcript	ZK930.3a	protein_coding
II	11907725	A	[G]	{G, A}	0.0153846	1	TRUE	FALSE	TRUE	0.0305307	65	0	1	64	G	missense_variant	MODERATE	ZK930.4	WBGene00014154	transcript	ZK930.4	protein_coding
II	11908202	A	[T]	{A, T}	0.0307692	1	TRUE	FALSE	FALSE	0.0601073	65	0	2	63	T	missense_variant	MODERATE	ZK930.4	WBGene00014154	transcript	ZK930.4	protein_coding
II	11908221	T	[G]	{G, T}	0.0153846	1	TRUE	FALSE	FALSE	0.0305307	65	0	1	64	G	missense_variant	MODERATE	ZK930.4	WBGene00014154	transcript	ZK930.4	protein_coding
II	11908249	A	[G]	{G, A}	0.848485	1	TRUE	FALSE	TRUE	0.259079	66	0	56	10	G	missense_variant	MODERATE	ZK930.4	WBGene00014154	transcript	ZK930.4	protein_coding
II	11908403	G	[T]	{G, T}	0.0151515	1	TRUE	FALSE	FALSE	0.0300717	66	0	1	65	T	missense_variant	MODERATE	ZK930.4	WBGene00014154	transcript	ZK930.4	protein_coding
II	11908413	G	[T]	{G, T}	0.0151515	1	TRUE	FALSE	FALSE	0.0300717	66	0	1	65	T	missense_variant	MODERATE	ZK930.4	WBGene00014154	transcript	ZK930.4	protein_coding
II	11909566	G	[A]	{G, A}	0.30303	1	TRUE	FALSE	TRUE	0.42563	66	0	20	46	A	missense_variant	MODERATE	vps-15	WBGene00014151	transcript	ZK930.1a	protein_coding
II	11909977	G	[A]	{G, A}	0.0151515	1	TRUE	FALSE	TRUE	0.0300717	66	0	1	65	A	missense_variant	MODERATE	vps-15	WBGene00014151	transcript	ZK930.1a	protein_coding
II	11910240	C	[T]	{C, T}	0.0606061	1	TRUE	FALSE	TRUE	0.114735	66	0	4	62	T	missense_variant	MODERATE	vps-15	WBGene00014151	transcript	ZK930.1a	protein_coding
II	11910394	A	[T]	{A, T}	0.151515	1	TRUE	FALSE	FALSE	0.259079	66	0	10	56	T	missense_variant	MODERATE	vps-15	WBGene00014151	transcript	ZK930.1a	protein_coding
II	11911242	G	[A]	{G, A}	0.030303	1	TRUE	FALSE	TRUE	0.0592181	66	0	2	64	A	missense_variant	MODERATE	vps-15	WBGene00014151	transcript	ZK930.1a	protein_coding
II	11911450	T	[C]	{C, T}	0.348485	1	TRUE	FALSE	TRUE	0.457553	66	0	23	43	C	missense_variant	MODERATE	vps-15	WBGene00014151	transcript	ZK930.1a	protein_coding
II	11911779	T	[G]	{G, T}	0.0151515	1	TRUE	FALSE	FALSE	0.0300717	66	0	1	65	G	missense_variant	MODERATE	vps-15	WBGene00014151	transcript	ZK930.1a	protein_coding
II	11912611	G	[T]	{G, T}	0.0151515	1	TRUE	FALSE	FALSE	0.0300717	66	0	1	65	T	missense_variant	MODERATE	vps-15	WBGene00014151	transcript	ZK930.1a	protein_coding
II	11915019	C	[A]	{C, A}	0.0923077	1	TRUE	FALSE	FALSE	0.168873	65	0	6	59	A	missense_variant	MODERATE	ZK930.7	WBGene00014157	transcript	ZK930.7	protein_coding
II	11915066	C	[T]	{C, T}	0.0153846	1	TRUE	FALSE	TRUE	0.0305307	65	0	1	64	T	missense_variant	MODERATE	ZK930.7	WBGene00014157	transcript	ZK930.7	protein_coding
II	11915225	T	[C]	{C, T}	0.153846	1	TRUE	FALSE	TRUE	0.262373	65	0	10	55	C	missense_variant	MODERATE	ZK930.7	WBGene00014157	transcript	ZK930.7	protein_coding
II	11916942	A	[G]	{G, A}	0.123077	1	TRUE	FALSE	TRUE	0.217531	65	0	8	57	G	missense_variant	MODERATE	hmg-12	WBGene00001977	transcript	Y17G7A.1	protein_coding
II	11916943	T	[C]	{C, T}	0.307692	1	TRUE	FALSE	TRUE	0.429338	65	0	20	45	C	missense_variant	MODERATE	hmg-12	WBGene00001977	transcript	Y17G7A.1	protein_coding
II	11917174	C	[T]	{C, T}	0.0769231	1	TRUE	FALSE	TRUE	0.143113	65	0	5	60	T	missense_variant	MODERATE	hmg-12	WBGene00001977	transcript	Y17G7A.1	protein_coding
II	11917224	G	[T]	{G, T}	0.0769231	1	TRUE	FALSE	FALSE	0.143113	65	0	5	60	T	missense_variant	MODERATE	hmg-12	WBGene00001977	transcript	Y17G7A.1	protein_coding
II	11917227	G	[T]	{G, T}	0.0153846	1	TRUE	FALSE	FALSE	0.0305307	65	0	1	64	T	missense_variant	MODERATE	hmg-12	WBGene00001977	transcript	Y17G7A.1	protein_coding
II	11917330	C	[G]	{C, G}	0.153846	1	TRUE	FALSE	FALSE	0.262373	65	0	10	55	G	missense_variant	MODERATE	hmg-12	WBGene00001977	transcript	Y17G7A.1	protein_coding
II	11932906	G	[A]	{G, A}	0.0151515	1	TRUE	FALSE	TRUE	0.0300717	66	0	1	65	A	missense_variant	MODERATE	lin-29	WBGene00003015	transcript	W03C9.4a	protein_coding
II	11932996	A	[G]	{G, A}	0.151515	1	TRUE	FALSE	TRUE	0.259079	66	0	10	56	G	missense_variant	MODERATE	lin-29	WBGene00003015	transcript	W03C9.4a	protein_coding
II	11933015	C	[A]	{C, A}	0.0151515	1	TRUE	FALSE	FALSE	0.0300717	66	0	1	65	A	missense_variant	MODERATE	lin-29	WBGene00003015	transcript	W03C9.4a	protein_coding
II	11933169	G	[C]	{C, G}	0.606061	1	TRUE	FALSE	FALSE	0.481147	66	0	40	26	C	missense_variant	MODERATE	lin-29	WBGene00003015	transcript	W03C9.4a	protein_coding
II	11948981	G	[T]	{G, T}	0.0153846	1	TRUE	FALSE	FALSE	0.0305307	65	0	1	64	T	missense_variant	MODERATE	W03C9.8	WBGene00012223	transcript	W03C9.8	protein_coding
II	11948988	G	[A]	{G, A}	0.0615385	1	TRUE	FALSE	TRUE	0.116398	65	0	4	61	A	missense_variant	MODERATE	W03C9.8	WBGene00012223	transcript	W03C9.8	protein_coding
II	11954520	G	[A]	{G, A}	0.030303	1	TRUE	FALSE	TRUE	0.0592181	66	0	2	64	A	missense_variant	MODERATE	W03C9.6	WBGene00012222	transcript	W03C9.6.1	protein_coding
II	11954582	T	[G]	{G, T}	0.030303	1	TRUE	FALSE	FALSE	0.0592181	66	0	2	64	G	missense_variant	MODERATE	W03C9.6	WBGene00012222	transcript	W03C9.6.1	protein_coding
II	11954588	T	[A]	{A, T}	0.348485	1	TRUE	FALSE	FALSE	0.457553	66	0	23	43	A	missense_variant&splice_region_variant	MODERATE	W03C9.6	WBGene00012222	transcript	W03C9.6.1	protein_coding
II	11954764	C	[A]	{C, A}	0.166667	1	TRUE	FALSE	FALSE	0.279898	66	0	11	55	A	missense_variant	MODERATE	W03C9.6	WBGene00012222	transcript	W03C9.6.1	protein_coding
II	11954782	A	[G]	{G, A}	0.0151515	1	TRUE	FALSE	TRUE	0.0300717	66	0	1	65	G	missense_variant	MODERATE	W03C9.6	WBGene00012222	transcript	W03C9.6.1	protein_coding
II	11958257	A	[G]	{G, A}	0.166667	1	TRUE	FALSE	TRUE	0.279898	66	0	11	55	G	missense_variant	MODERATE	W03C9.6	WBGene00012222	transcript	W03C9.6.1	protein_coding
II	11958291	G	[A]	{G, A}	0.0606061	1	TRUE	FALSE	TRUE	0.114735	66	0	4	62	A	missense_variant	MODERATE	W03C9.6	WBGene00012222	transcript	W03C9.6.1	protein_coding
II	11961027	A	[T]	{A, T}	0.03125	1	TRUE	FALSE	FALSE	0.0610236	64	0	2	62	T	missense_variant	MODERATE	W03C9.1	WBGene00012219	transcript	W03C9.1	protein_coding
II	11961076	C	[A]	{C, A}	0.03125	1	TRUE	FALSE	FALSE	0.0610236	64	0	2	62	A	missense_variant	MODERATE	W03C9.1	WBGene00012219	transcript	W03C9.1	protein_coding
II	11961090	G	[C]	{C, G}	0.893939	1	TRUE	FALSE	FALSE	0.191071	66	0	59	7	C	missense_variant	MODERATE	W03C9.1	WBGene00012219	transcript	W03C9.1	protein_coding
II	11961831	T	[C]	{C, T}	0.0151515	1	TRUE	FALSE	TRUE	0.0300717	66	0	1	65	C	missense_variant	MODERATE	W03C9.1	WBGene00012219	transcript	W03C9.1	protein_coding
II	11962447	T	[C]	{C, T}	0.030303	1	TRUE	FALSE	TRUE	0.0592181	66	0	2	64	C	missense_variant	MODERATE	W03C9.2	WBGene00012220	transcript	W03C9.2	protein_coding
II	11962605	G	[C]	{C, G}	0.0151515	1	TRUE	FALSE	FALSE	0.0300717	66	0	1	65	C	missense_variant	MODERATE	W03C9.2	WBGene00012220	transcript	W03C9.2	protein_coding
II	11962787	G	[A]	{G, A}	0.0151515	1	TRUE	FALSE	TRUE	0.0300717	66	0	1	65	A	missense_variant	MODERATE	W03C9.2	WBGene00012220	transcript	W03C9.2	protein_coding
II	11964333	A	[G]	{G, A}	0.0454545	1	TRUE	FALSE	TRUE	0.0874393	66	0	3	63	G	missense_variant	MODERATE	W03C9.2	WBGene00012220	transcript	W03C9.2	protein_coding
II	11967202	T	[G]	{G, T}	0.030303	1	TRUE	FALSE	FALSE	0.0592181	66	0	2	64	G	missense_variant	MODERATE	W03C9.5	WBGene00012221	transcript	W03C9.5	protein_coding
II	11967222	T	[G]	{G, T}	0.0606061	1	TRUE	FALSE	FALSE	0.114735	66	0	4	62	G	missense_variant	MODERATE	W03C9.5	WBGene00012221	transcript	W03C9.5	protein_coding
II	11968706	G	[A]	{G, A}	0.0151515	1	TRUE	FALSE	TRUE	0.0300717	66	0	1	65	A	missense_variant	MODERATE	mex-1	WBGene00003228	transcript	W03C9.7a.1	protein_coding
II	11968761	A	[C]	{C, A}	0.893939	1	TRUE	FALSE	FALSE	0.191071	66	0	59	7	C	missense_variant	MODERATE	mex-1	WBGene00003228	transcript	W03C9.7a.1	protein_coding
II	11968980	T	[A]	{A, T}	0.0151515	1	TRUE	FALSE	FALSE	0.0300717	66	0	1	65	A	missense_variant	MODERATE	mex-1	WBGene00003228	transcript	W03C9.7a.1	protein_coding
II	11970312	ACATCAG	[A, ACACCAGCATCAG, AAATCAGCATCAG, ACAGCAGCATCAG, ACAACAGCATCAG, ACCTCAGCATCAG, ACATCAGCATCAG, ATATCAGCAGCATCAG]	{ACATCAG, A}	0.0454545	1	FALSE	TRUE	FALSE	0.0874393	66	0	3	63	AAATCAGCATCAG	conservative_inframe_insertion	MODERATE	mex-1	WBGene00003228	transcript	W03C9.7a.1	protein_coding
II	11970321	G	[T]	{G, T}	0.0230769	1	TRUE	FALSE	FALSE	0.0454383	65	1	1	63	T	missense_variant	MODERATE	mex-1	WBGene00003228	transcript	W03C9.7a.1	protein_coding
II	11970321	G	[GCAC, GCAGCAT]	{G, GCAC}	0.0208333	1	FALSE	TRUE	FALSE	0.0412281	48	0	1	47	GCAC	disruptive_inframe_insertion	MODERATE	mex-1	WBGene00003228	transcript	W03C9.7a.1	protein_coding
II	11970325	CAGCAGT	[C, CAGCAGAAGCAGT, CAGCAGCAGAAGCAGT]	{CAGCAGT, C, CAGCAGCAGAAGCAGT}	0.0227273	1	FALSE	TRUE	FALSE	0.0447606	66	1	1	64	CAGCAGAAGCAGT	conservative_inframe_insertion	MODERATE	mex-1	WBGene00003228	transcript	W03C9.7a.1	protein_coding
II	11970441	TGAGCAGCAGCAGCAG	[T, TCAGCAGCAGCAG, TCAGCAGCAG]	{TCAGCAGCAG, TGAGCAGCAGCAGCAG, T}	0.0230769	1	FALSE	TRUE	FALSE	0.0454383	65	1	1	63	TCAGCAGCAGCAG	conservative_inframe_deletion	MODERATE	mex-1	WBGene00003228	transcript	W03C9.7a.1	protein_coding
II	11970450	G	[GCAGCAGCAT]	{G, GCAGCAGCAT}	0.0151515	1	FALSE	TRUE	FALSE	0.0300717	66	0	1	65	GCAGCAGCAT	disruptive_inframe_insertion	MODERATE	mex-1	WBGene00003228	transcript	W03C9.7a.1	protein_coding
II	11970466	CAGA	[C]	{CAGA, C}	0.0454545	1	FALSE	TRUE	FALSE	0.0874393	66	0	3	63	C	disruptive_inframe_deletion	MODERATE	mex-1	WBGene00003228	transcript	W03C9.7a.1	protein_coding
II	11970593	T	[A]	{A, T}	0.030303	1	TRUE	FALSE	FALSE	0.0592181	66	0	2	64	A	missense_variant	MODERATE	mex-1	WBGene00003228	transcript	W03C9.7a.1	protein_coding
II	11971940	T	[C]	{C, T}	0.712121	1	TRUE	FALSE	TRUE	0.413139	66	0	47	19	C	missense_variant	MODERATE	mex-1	WBGene00003228	transcript	W03C9.7a.1	protein_coding
II	11972447	C	[T]	{C, T}	0.136364	1	TRUE	FALSE	TRUE	0.237335	66	0	9	57	T	missense_variant	MODERATE	acbp-6	WBGene00012457	transcript	Y17G7B.1	protein_coding
II	11972475	A	[T]	{A, T}	0.0151515	1	TRUE	FALSE	FALSE	0.0300717	66	0	1	65	T	missense_variant	MODERATE	acbp-6	WBGene00012457	transcript	Y17G7B.1	protein_coding
II	11972515	C	[A]	{C, A}	0.121212	1	TRUE	FALSE	FALSE	0.214666	66	0	8	58	A	missense_variant	MODERATE	acbp-6	WBGene00012457	transcript	Y17G7B.1	protein_coding
II	11972653	G	[T]	{G, T}	0.0151515	1	TRUE	FALSE	FALSE	0.0300717	66	0	1	65	T	missense_variant	MODERATE	acbp-6	WBGene00012457	transcript	Y17G7B.1	protein_coding
II	11973644	T	[A]	{A, T}	0.0151515	1	TRUE	FALSE	FALSE	0.0300717	66	0	1	65	A	missense_variant&splice_region_variant	MODERATE	acbp-6	WBGene00012457	transcript	Y17G7B.1	protein_coding
II	11976080	TCTCCTCCTC	[T, TCTCCTCCTCCTC]	{TCTCCTCCTCCTC, TCTCCTCCTC}	0.0151515	1	FALSE	TRUE	FALSE	0.0300717	66	0	1	65	TCTCCTCCTCCTC	conservative_inframe_insertion	MODERATE	Y17G7B.21	WBGene00012472	transcript	Y17G7B.21a	protein_coding
II	11976081	C	[CTCT]	{C, CTCT}	0.0151515	1	FALSE	TRUE	FALSE	0.0300717	66	0	1	65	CTCT	disruptive_inframe_insertion	MODERATE	Y17G7B.21	WBGene00012472	transcript	Y17G7B.21a	protein_coding
II	11976084	CTCCTCCTCA	[C]	{C, CTCCTCCTCA}	0.0151515	1	FALSE	TRUE	FALSE	0.0300717	66	0	1	65	C	disruptive_inframe_deletion	MODERATE	Y17G7B.21	WBGene00012472	transcript	Y17G7B.21a	protein_coding
II	11976087	CTCCTCATCA	[C]	{C, CTCCTCATCA}	0.0151515	1	FALSE	TRUE	FALSE	0.0300717	66	0	1	65	C	disruptive_inframe_deletion	MODERATE	Y17G7B.21	WBGene00012472	transcript	Y17G7B.21a	protein_coding
II	11976096	ATCC	[A]	{ATCC, A}	0.030303	1	FALSE	TRUE	FALSE	0.0592181	66	0	2	64	A	disruptive_inframe_deletion	MODERATE	Y17G7B.21	WBGene00012472	transcript	Y17G7B.21a	protein_coding
II	11976099	C	[A]	{C, A}	0.430769	1	TRUE	FALSE	FALSE	0.494216	65	0	28	37	A	missense_variant	MODERATE	Y17G7B.21	WBGene00012472	transcript	Y17G7B.21a	protein_coding
II	11977457	G	[C]	{C, G}	0.257576	1	TRUE	FALSE	FALSE	0.385381	66	0	17	49	C	missense_variant	MODERATE	Y17G7B.21	WBGene00012472	transcript	Y17G7B.21a	protein_coding
II	11977517	G	[T]	{G, T}	0.0151515	1	TRUE	FALSE	FALSE	0.0300717	66	0	1	65	T	missense_variant	MODERATE	Y17G7B.21	WBGene00012472	transcript	Y17G7B.21a	protein_coding
II	11977521	T	[C]	{C, T}	0.136364	1	TRUE	FALSE	TRUE	0.237335	66	0	9	57	C	missense_variant	MODERATE	Y17G7B.21	WBGene00012472	transcript	Y17G7B.21a	protein_coding
II	11978640	G	[A]	{G, A}	0.0151515	1	TRUE	FALSE	TRUE	0.0300717	66	0	1	65	A	missense_variant	MODERATE	Y17G7B.20	WBGene00012471	transcript	Y17G7B.20a	protein_coding
II	11979416	A	[G]	{G, A}	0.0151515	1	TRUE	FALSE	TRUE	0.0300717	66	0	1	65	G	missense_variant	MODERATE	Y17G7B.20	WBGene00012471	transcript	Y17G7B.20a	protein_coding
II	11979567	T	[A]	{A, T}	0.0151515	1	TRUE	FALSE	FALSE	0.0300717	66	0	1	65	A	missense_variant	MODERATE	Y17G7B.20	WBGene00012471	transcript	Y17G7B.20a	protein_coding
II	11979671	A	[G]	{G, A}	0.454545	1	TRUE	FALSE	TRUE	0.499653	66	0	30	36	G	missense_variant	MODERATE	Y17G7B.20	WBGene00012471	transcript	Y17G7B.20a	protein_coding
II	11980798	T	[C]	{C, T}	0.0151515	1	TRUE	FALSE	TRUE	0.0300717	66	0	1	65	C	missense_variant	MODERATE	ash-2	WBGene00012458	transcript	Y17G7B.2d	protein_coding
II	11986081	G	[A]	{G, A}	0.0757576	1	TRUE	FALSE	TRUE	0.141106	66	0	5	61	A	missense_variant	MODERATE	ash-2	WBGene00012458	transcript	Y17G7B.2d	protein_coding
II	11987426	T	[C]	{C, T}	0.0606061	1	TRUE	FALSE	TRUE	0.114735	66	0	4	62	C	missense_variant	MODERATE	ash-2	WBGene00012458	transcript	Y17G7B.2d	protein_coding
II	11988250	C	[T]	{C, T}	0.0151515	1	TRUE	FALSE	TRUE	0.0300717	66	0	1	65	T	missense_variant	MODERATE	ash-2	WBGene00012458	transcript	Y17G7B.2d	protein_coding
II	11990262	A	[G]	{G, A}	0.272727	1	TRUE	FALSE	TRUE	0.399722	66	0	18	48	G	missense_variant	MODERATE	Y17G7B.3	WBGene00012459	transcript	Y17G7B.3	protein_coding
II	11991522	G	[C]	{C, G}	0.0151515	1	TRUE	FALSE	FALSE	0.0300717	66	0	1	65	C	missense_variant	MODERATE	Y17G7B.3	WBGene00012459	transcript	Y17G7B.3	protein_coding
II	11991555	C	[T]	{C, T}	0.0151515	1	TRUE	FALSE	TRUE	0.0300717	66	0	1	65	T	missense_variant	MODERATE	Y17G7B.3	WBGene00012459	transcript	Y17G7B.3	protein_coding
II	11993111	C	[T]	{C, T}	0.0153846	1	TRUE	FALSE	TRUE	0.0305307	65	0	1	64	T	missense_variant	MODERATE	dhps-1	WBGene00012460	transcript	Y17G7B.4	protein_coding
II	11999541	G	[T]	{G, T}	0.0151515	1	TRUE	FALSE	FALSE	0.0300717	66	0	1	65	T	missense_variant	MODERATE	Y17G7B.23	WBGene00044030	transcript	Y17G7B.23a	protein_coding
II	11999542	C	[T]	{C, T}	0.0151515	1	TRUE	FALSE	TRUE	0.0300717	66	0	1	65	T	missense_variant	MODERATE	Y17G7B.23	WBGene00044030	transcript	Y17G7B.23a	protein_coding
II	11999618	A	[T]	{A, T}	0.0151515	1	TRUE	FALSE	FALSE	0.0300717	66	0	1	65	T	missense_variant	MODERATE	Y17G7B.23	WBGene00044030	transcript	Y17G7B.23a	protein_coding
II	11999633	C	[T]	{C, T}	0.0151515	1	TRUE	FALSE	TRUE	0.0300717	66	0	1	65	T	missense_variant	MODERATE	Y17G7B.23	WBGene00044030	transcript	Y17G7B.23a	protein_coding
II	12000655	A	[C]	{C, A}	0.0151515	1	TRUE	FALSE	FALSE	0.0300717	66	0	1	65	C	missense_variant	MODERATE	Y17G7B.23	WBGene00044030	transcript	Y17G7B.23a	protein_coding
II	12000841	A	[C]	{C, A}	0.0606061	1	TRUE	FALSE	FALSE	0.114735	66	0	4	62	C	missense_variant	MODERATE	Y17G7B.23	WBGene00044030	transcript	Y17G7B.23a	protein_coding
II	12001363	C	[A]	{C, A}	0.030303	1	TRUE	FALSE	FALSE	0.0592181	66	0	2	64	A	missense_variant	MODERATE	Y17G7B.23	WBGene00044030	transcript	Y17G7B.23a	protein_coding
II	12001397	C	[T]	{C, T}	0.0151515	1	TRUE	FALSE	TRUE	0.0300717	66	0	1	65	T	missense_variant	MODERATE	Y17G7B.23	WBGene00044030	transcript	Y17G7B.23a	protein_coding
II	12001988	C	[T]	{C, T}	0.0151515	1	TRUE	FALSE	TRUE	0.0300717	66	0	1	65	T	missense_variant	MODERATE	mcm-2	WBGene00003154	transcript	Y17G7B.5b	protein_coding
II	12003351	G	[A]	{G, A}	0.03125	1	TRUE	FALSE	TRUE	0.0610236	64	0	2	62	A	missense_variant	MODERATE	mcm-2	WBGene00003154	transcript	Y17G7B.5a.1	protein_coding
II	12003461	A	[G]	{G, A}	0.015625	1	TRUE	FALSE	TRUE	0.0310039	64	0	1	63	G	missense_variant	MODERATE	mcm-2	WBGene00003154	transcript	Y17G7B.5a.1	protein_coding
II	12009109	C	[T]	{C, T}	0.393939	1	TRUE	FALSE	TRUE	0.481147	66	0	26	40	T	missense_variant	MODERATE	glb-29	WBGene00012461	transcript	Y17G7B.6a	protein_coding
II	12013893	C	[A]	{C, A}	0.0151515	1	TRUE	FALSE	FALSE	0.0300717	66	0	1	65	A	missense_variant	MODERATE	glb-29	WBGene00012461	transcript	Y17G7B.6a	protein_coding
II	12023905	G	[A]	{G, A}	0.0151515	1	TRUE	FALSE	TRUE	0.0300717	66	0	1	65	A	missense_variant	MODERATE	Y17G7B.12	WBGene00012465	transcript	Y17G7B.12	protein_coding
II	12023979	A	[C]	{C, A}	0.348485	1	TRUE	FALSE	FALSE	0.457553	66	0	23	43	C	missense_variant	MODERATE	Y17G7B.12	WBGene00012465	transcript	Y17G7B.12	protein_coding
II	12024049	C	[A]	{C, A}	0.0151515	1	TRUE	FALSE	FALSE	0.0300717	66	0	1	65	A	missense_variant	MODERATE	Y17G7B.12	WBGene00012465	transcript	Y17G7B.12	protein_coding
II	12024051	G	[C]	{C, G}	0.0151515	1	TRUE	FALSE	FALSE	0.0300717	66	0	1	65	C	missense_variant	MODERATE	Y17G7B.12	WBGene00012465	transcript	Y17G7B.12	protein_coding
II	12024397	A	[G]	{G, A}	0.030303	1	TRUE	FALSE	TRUE	0.0592181	66	0	2	64	G	missense_variant	MODERATE	Y17G7B.12	WBGene00012465	transcript	Y17G7B.12	protein_coding
II	12025805	A	[G]	{G, A}	0.0151515	1	TRUE	FALSE	TRUE	0.0300717	66	0	1	65	G	missense_variant	MODERATE	Y17G7B.12	WBGene00012465	transcript	Y17G7B.12	protein_coding
II	12025966	C	[A]	{C, A}	0.0151515	1	TRUE	FALSE	FALSE	0.0300717	66	0	1	65	A	missense_variant	MODERATE	Y17G7B.8	WBGene00012462	transcript	Y17G7B.8	protein_coding
II	12025976	G	[A]	{G, A}	0.378788	1	TRUE	FALSE	TRUE	0.474208	66	0	25	41	A	missense_variant	MODERATE	Y17G7B.8	WBGene00012462	transcript	Y17G7B.8	protein_coding
II	12026012	G	[A]	{G, A}	0.333333	1	TRUE	FALSE	TRUE	0.447837	66	0	22	44	A	missense_variant&splice_region_variant	MODERATE	Y17G7B.8	WBGene00012462	transcript	Y17G7B.8	protein_coding
II	12026133	C	[T]	{C, T}	0.363636	1	TRUE	FALSE	TRUE	0.466343	66	0	24	42	T	missense_variant&splice_region_variant	MODERATE	Y17G7B.8	WBGene00012462	transcript	Y17G7B.8	protein_coding
II	12026185	A	[G]	{G, A}	0.0151515	1	TRUE	FALSE	TRUE	0.0300717	66	0	1	65	G	missense_variant	MODERATE	Y17G7B.8	WBGene00012462	transcript	Y17G7B.8	protein_coding
II	12026275	G	[C]	{C, G}	0.0757576	1	TRUE	FALSE	FALSE	0.141106	66	0	5	61	C	missense_variant	MODERATE	Y17G7B.8	WBGene00012462	transcript	Y17G7B.8	protein_coding
II	12026349	C	[T]	{C, T}	0.0151515	1	TRUE	FALSE	TRUE	0.0300717	66	0	1	65	T	missense_variant	MODERATE	Y17G7B.8	WBGene00012462	transcript	Y17G7B.8	protein_coding
II	12026358	A	[G]	{G, A}	0.121212	1	TRUE	FALSE	TRUE	0.214666	66	0	8	58	G	missense_variant	MODERATE	Y17G7B.8	WBGene00012462	transcript	Y17G7B.8	protein_coding
II	12026525	C	[G]	{C, G}	0.0151515	1	TRUE	FALSE	FALSE	0.0300717	66	0	1	65	G	missense_variant	MODERATE	Y17G7B.8	WBGene00012462	transcript	Y17G7B.8	protein_coding
II	12026560	T	[C]	{C, T}	0.0151515	1	TRUE	FALSE	TRUE	0.0300717	66	0	1	65	C	missense_variant	MODERATE	Y17G7B.8	WBGene00012462	transcript	Y17G7B.8	protein_coding
II	12026864	T	[C]	{C, T}	0.121212	1	TRUE	FALSE	TRUE	0.214666	66	0	8	58	C	missense_variant	MODERATE	Y17G7B.8	WBGene00012462	transcript	Y17G7B.8	protein_coding
II	12026938	C	[T, A]	{C, T}	0.030303	1	TRUE	FALSE	FALSE	0.0592181	66	0	2	64	A	missense_variant	MODERATE	Y17G7B.8	WBGene00012462	transcript	Y17G7B.8	protein_coding
II	12026971	T	[C]	{C, T}	0.0151515	1	TRUE	FALSE	TRUE	0.0300717	66	0	1	65	C	missense_variant	MODERATE	Y17G7B.8	WBGene00012462	transcript	Y17G7B.8	protein_coding
II	12026975	C	[T]	{C, T}	0.030303	1	TRUE	FALSE	TRUE	0.0592181	66	0	2	64	T	missense_variant	MODERATE	Y17G7B.8	WBGene00012462	transcript	Y17G7B.8	protein_coding
II	12026993	ATCGATTTTC	[A]	{A, ATCGATTTTC}	0.0454545	1	FALSE	TRUE	FALSE	0.0874393	66	0	3	63	A	conservative_inframe_deletion	MODERATE	Y17G7B.8	WBGene00012462	transcript	Y17G7B.8	protein_coding
II	12027010	G	[C]	{C, G}	0.0151515	1	TRUE	FALSE	FALSE	0.0300717	66	0	1	65	C	missense_variant	MODERATE	Y17G7B.8	WBGene00012462	transcript	Y17G7B.8	protein_coding
II	12027237	G	[C]	{C, G}	0.0151515	1	TRUE	FALSE	FALSE	0.0300717	66	0	1	65	C	missense_variant	MODERATE	Y17G7B.8	WBGene00012462	transcript	Y17G7B.8	protein_coding
II	12027296	A	[C]	{C, A}	0.030303	1	TRUE	FALSE	FALSE	0.0592181	66	0	2	64	C	missense_variant	MODERATE	Y17G7B.8	WBGene00012462	transcript	Y17G7B.8	protein_coding
II	12027338	T	[G]	{G, T}	0.0151515	1	TRUE	FALSE	FALSE	0.0300717	66	0	1	65	G	missense_variant	MODERATE	Y17G7B.8	WBGene00012462	transcript	Y17G7B.8	protein_coding
II	12027719	G	[A]	{G, A}	0.0151515	1	TRUE	FALSE	TRUE	0.0300717	66	0	1	65	A	missense_variant	MODERATE	Y17G7B.8	WBGene00012462	transcript	Y17G7B.8	protein_coding
II	12033878	C	[T]	{C, T}	0.0151515	1	TRUE	FALSE	TRUE	0.0300717	66	0	1	65	T	missense_variant	MODERATE	cyn-16	WBGene00000892	transcript	Y17G7B.9	protein_coding
II	12034096	G	[A]	{G, A}	0.030303	1	TRUE	FALSE	TRUE	0.0592181	66	0	2	64	A	missense_variant	MODERATE	cyn-16	WBGene00000892	transcript	Y17G7B.9	protein_coding
II	12038548	T	[G]	{G, T}	0.0151515	1	TRUE	FALSE	FALSE	0.0300717	66	0	1	65	G	missense_variant	MODERATE	tpi-1	WBGene00006601	transcript	Y17G7B.7	protein_coding
II	12038874	A	[T]	{A, T}	0.0909091	1	TRUE	FALSE	FALSE	0.166551	66	0	6	60	T	missense_variant	MODERATE	tpi-1	WBGene00006601	transcript	Y17G7B.7	protein_coding
II	12039029	G	[T]	{G, T}	0.166667	1	TRUE	FALSE	FALSE	0.279898	66	0	11	55	T	missense_variant	MODERATE	tpi-1	WBGene00006601	transcript	Y17G7B.7	protein_coding
II	12042992	A	[G]	{G, A}	0.030303	1	TRUE	FALSE	TRUE	0.0592181	66	0	2	64	G	missense_variant	MODERATE	ippk-1	WBGene00012466	transcript	Y17G7B.13	protein_coding
II	12043070	T	[C]	{C, T}	0.0151515	1	TRUE	FALSE	TRUE	0.0300717	66	0	1	65	C	missense_variant	MODERATE	ippk-1	WBGene00012466	transcript	Y17G7B.13	protein_coding
II	12044325	A	[G]	{G, A}	0.030303	1	TRUE	FALSE	TRUE	0.0592181	66	0	2	64	G	missense_variant	MODERATE	ippk-1	WBGene00012466	transcript	Y17G7B.13	protein_coding
II	12044470	G	[T]	{G, T}	0.0151515	1	TRUE	FALSE	FALSE	0.0300717	66	0	1	65	T	missense_variant	MODERATE	ippk-1	WBGene00012466	transcript	Y17G7B.13	protein_coding
II	12045898	A	[G]	{G, A}	0.166667	1	TRUE	FALSE	TRUE	0.279898	66	0	11	55	G	missense_variant	MODERATE	ippk-1	WBGene00012466	transcript	Y17G7B.13	protein_coding
II	12045991	T	[G]	{G, T}	0.0151515	1	TRUE	FALSE	FALSE	0.0300717	66	0	1	65	G	missense_variant	MODERATE	ippk-1	WBGene00012466	transcript	Y17G7B.13	protein_coding
II	12046032	C	[A]	{C, A}	0.0151515	1	TRUE	FALSE	FALSE	0.0300717	66	0	1	65	A	missense_variant	MODERATE	ippk-1	WBGene00012466	transcript	Y17G7B.13	protein_coding
II	12046089	C	[A]	{C, A}	0.0151515	1	TRUE	FALSE	FALSE	0.0300717	66	0	1	65	A	missense_variant	MODERATE	ippk-1	WBGene00012466	transcript	Y17G7B.13	protein_coding
II	12047007	A	[G]	{G, A}	0.106061	1	TRUE	FALSE	TRUE	0.191071	66	0	7	59	G	missense_variant	MODERATE	ippk-1	WBGene00012466	transcript	Y17G7B.13	protein_coding
II	12047252	G	[A]	{G, A}	0.0151515	1	TRUE	FALSE	TRUE	0.0300717	66	0	1	65	A	missense_variant	MODERATE	ippk-1	WBGene00012466	transcript	Y17G7B.13	protein_coding
II	12047284	TGAA	[T]	{TGAA, T}	0.030303	1	FALSE	TRUE	FALSE	0.0592181	66	0	2	64	T	conservative_inframe_deletion	MODERATE	ippk-1	WBGene00012466	transcript	Y17G7B.13	protein_coding
II	12048207	T	[C]	{C, T}	0.0454545	1	TRUE	FALSE	TRUE	0.0874393	66	0	3	63	C	missense_variant	MODERATE	ippk-1	WBGene00012466	transcript	Y17G7B.13	protein_coding
II	12058375	C	[T]	{C, T}	0.106061	1	TRUE	FALSE	TRUE	0.191071	66	0	7	59	T	missense_variant	MODERATE	Y17G7B.10	WBGene00012463	transcript	Y17G7B.10b.1	protein_coding
II	12058655	C	[G]	{C, G}	0.0454545	1	TRUE	FALSE	FALSE	0.0874393	66	0	3	63	G	missense_variant	MODERATE	Y17G7B.10	WBGene00012463	transcript	Y17G7B.10b.1	protein_coding
II	12060647	G	[A]	{G, A}	0.242424	1	TRUE	FALSE	TRUE	0.370113	66	0	16	50	A	missense_variant	MODERATE	arrd-7	WBGene00012464	transcript	Y17G7B.11	protein_coding
II	12062219	T	[G]	{G, T}	0.212121	1	TRUE	FALSE	FALSE	0.336803	66	0	14	52	G	missense_variant	MODERATE	arrd-7	WBGene00012464	transcript	Y17G7B.11	protein_coding
II	12062544	T	[C]	{C, T}	0.212121	1	TRUE	FALSE	TRUE	0.336803	66	0	14	52	C	missense_variant	MODERATE	arrd-7	WBGene00012464	transcript	Y17G7B.11	protein_coding
II	12065089	G	[A]	{G, A}	0.215385	1	TRUE	FALSE	TRUE	0.340608	65	0	14	51	A	missense_variant	MODERATE	arrd-8	WBGene00012467	transcript	Y17G7B.14	protein_coding
II	12065206	A	[C]	{C, A}	0.0153846	1	TRUE	FALSE	FALSE	0.0305307	65	0	1	64	C	missense_variant	MODERATE	arrd-8	WBGene00012467	transcript	Y17G7B.14	protein_coding
II	12066195	G	[A]	{G, A}	0.0307692	1	TRUE	FALSE	TRUE	0.0601073	65	0	2	63	A	missense_variant	MODERATE	arrd-8	WBGene00012467	transcript	Y17G7B.14	protein_coding
II	12066887	T	[A]	{A, T}	0.106061	1	TRUE	FALSE	FALSE	0.191071	66	0	7	59	A	missense_variant	MODERATE	arrd-8	WBGene00012467	transcript	Y17G7B.14	protein_coding
II	12066947	A	[G]	{G, A}	0.924242	1	TRUE	FALSE	TRUE	0.141106	66	0	61	5	G	missense_variant	MODERATE	arrd-8	WBGene00012467	transcript	Y17G7B.14	protein_coding
II	12066958	A	[G]	{G, A}	0.212121	1	TRUE	FALSE	TRUE	0.336803	66	0	14	52	G	missense_variant	MODERATE	arrd-8	WBGene00012467	transcript	Y17G7B.14	protein_coding
II	12067273	T	[G]	{G, T}	0.212121	1	TRUE	FALSE	FALSE	0.336803	66	0	14	52	G	missense_variant	MODERATE	arrd-8	WBGene00012467	transcript	Y17G7B.14	protein_coding
II	12067295	T	[A]	{A, T}	0.0151515	1	TRUE	FALSE	FALSE	0.0300717	66	0	1	65	A	missense_variant	MODERATE	arrd-8	WBGene00012467	transcript	Y17G7B.14	protein_coding
II	12067524	G	[C]	{C, G}	0.212121	1	TRUE	FALSE	FALSE	0.336803	66	0	14	52	C	missense_variant	MODERATE	arrd-8	WBGene00012467	transcript	Y17G7B.14	protein_coding

## Sheet: Low
CHROM	POS	REF	ALT	allele_set	aaf	call_rate	is_snp	is_indel	is_transition	nucl_diversity	num_called	num_het	num_hom_alt	num_hom_ref	ANN	Mutation type	Impact	Gene name	WBGene ID	Transcript?	Gene ID	Gene Type
II	11534304	T	[C]	{C, T}	0.166667	1	TRUE	FALSE	TRUE	0.279898	66	0	11	55	C	synonymous_variant	LOW	Y62F5A.12	WBGene00077453	transcript	Y62F5A.12	protein_coding
II	11534406	C	[A]	{C, A}	0.151515	1	TRUE	FALSE	FALSE	0.259079	66	0	10	56	A	synonymous_variant	LOW	Y62F5A.12	WBGene00077453	transcript	Y62F5A.12	protein_coding
II	11535141	ATTAAAATTTATTAAATAAAAATAT	[A]	{A, ATTAAAATTTATTAAATAAAAATAT}	0.0151515	1	FALSE	TRUE	FALSE	0.0300717	66	0	1	65	A	splice_region_variant	LOW	Y62F5A.9	WBGene00013387	transcript	Y62F5A.9	protein_coding
II	11535313	A	[G]	{G, A}	0.0757576	1	TRUE	FALSE	TRUE	0.141106	66	0	5	61	G	synonymous_variant	LOW	Y62F5A.9	WBGene00013387	transcript	Y62F5A.9	protein_coding
II	11535364	G	[A]	{G, A}	0.0151515	1	TRUE	FALSE	TRUE	0.0300717	66	0	1	65	A	synonymous_variant	LOW	Y62F5A.9	WBGene00013387	transcript	Y62F5A.9	protein_coding
II	11535513	GA	[G]	{G, GA}	0.0151515	1	FALSE	TRUE	FALSE	0.0300717	66	0	1	65	G	splice_region_variant&intron_variant	LOW	Y62F5A.9	WBGene00013387	transcript	Y62F5A.9	protein_coding
II	11538674	A	[G]	{G, A}	0.0151515	1	TRUE	FALSE	TRUE	0.0300717	66	0	1	65	G	synonymous_variant	LOW	Y62F5A.9	WBGene00013387	transcript	Y62F5A.9	protein_coding
II	11538752	G	[A]	{G, A}	0.0151515	1	TRUE	FALSE	TRUE	0.0300717	66	0	1	65	A	synonymous_variant	LOW	Y62F5A.9	WBGene00013387	transcript	Y62F5A.9	protein_coding
II	11538788	T	[A]	{A, T}	0.19697	1	TRUE	FALSE	FALSE	0.31876	66	0	13	53	A	synonymous_variant	LOW	Y62F5A.9	WBGene00013387	transcript	Y62F5A.9	protein_coding
II	11539269	A	[G]	{G, A}	0.0909091	1	TRUE	FALSE	TRUE	0.166551	66	0	6	60	G	synonymous_variant	LOW	F54D5.12	WBGene00010055	transcript	F54D5.12	protein_coding
II	11539368	C	[T]	{C, T}	0.0151515	1	TRUE	FALSE	TRUE	0.0300717	66	0	1	65	T	synonymous_variant	LOW	F54D5.12	WBGene00010055	transcript	F54D5.12	protein_coding
II	11539527	G	[A]	{G, A}	0.166667	1	TRUE	FALSE	TRUE	0.279898	66	0	11	55	A	synonymous_variant	LOW	F54D5.12	WBGene00010055	transcript	F54D5.12	protein_coding
II	11539602	C	[A]	{C, A}	0.0909091	1	TRUE	FALSE	FALSE	0.166551	66	0	6	60	A	synonymous_variant	LOW	F54D5.12	WBGene00010055	transcript	F54D5.12	protein_coding
II	11539728	G	[A]	{G, A}	0.0909091	1	TRUE	FALSE	TRUE	0.166551	66	0	6	60	A	synonymous_variant	LOW	F54D5.12	WBGene00010055	transcript	F54D5.12	protein_coding
II	11540294	C	[T]	{C, T}	0.0151515	1	TRUE	FALSE	TRUE	0.0300717	66	0	1	65	T	synonymous_variant	LOW	F54D5.12	WBGene00010055	transcript	F54D5.12	protein_coding
II	11540892	C	[T]	{C, T}	0.0151515	1	TRUE	FALSE	TRUE	0.0300717	66	0	1	65	T	synonymous_variant	LOW	F54D5.11	WBGene00010054	transcript	F54D5.11.1	protein_coding
II	11541877	C	[G]	{C, G}	0.0757576	1	TRUE	FALSE	FALSE	0.141106	66	0	5	61	G	synonymous_variant	LOW	F54D5.11	WBGene00010054	transcript	F54D5.11.1	protein_coding
II	11542085	A	[G]	{G, A}	0.0757576	1	TRUE	FALSE	TRUE	0.141106	66	0	5	61	G	splice_region_variant&intron_variant	LOW	F54D5.11	WBGene00010054	transcript	F54D5.11.1	protein_coding
II	11542203	G	[T]	{G, T}	0.0151515	1	TRUE	FALSE	FALSE	0.0300717	66	0	1	65	T	synonymous_variant	LOW	F54D5.11	WBGene00010054	transcript	F54D5.11.1	protein_coding
II	11542943	C	[T]	{C, T}	0.0151515	1	TRUE	FALSE	TRUE	0.0300717	66	0	1	65	T	synonymous_variant	LOW	F54D5.9	WBGene00010053	transcript	F54D5.9	protein_coding
II	11543073	G	[GTAATAATAA]	{G, GTAATAATAA}	0.0151515	1	FALSE	TRUE	FALSE	0.0300717	66	0	1	65	GTAATAATAA	splice_region_variant&intron_variant	LOW	F54D5.9	WBGene00010053	transcript	F54D5.9	protein_coding
II	11543439	AAAT	[A]	{AAAT, A}	0.174603	1	FALSE	TRUE	FALSE	0.29054	63	0	11	52	A	splice_region_variant&intron_variant	LOW	F54D5.9	WBGene00010053	transcript	F54D5.9	protein_coding
II	11543440	A	[T]	{A, T}	0.114754	1	TRUE	FALSE	FALSE	0.20485	61	0	7	54	T	splice_region_variant&intron_variant	LOW	F54D5.9	WBGene00010053	transcript	F54D5.9	protein_coding
II	11543440	AAT	[A]	{AAT, A}	0.0754717	1	FALSE	TRUE	FALSE	0.140881	53	0	4	49	A	splice_region_variant&intron_variant	LOW	F54D5.9	WBGene00010053	transcript	F54D5.9	protein_coding
II	11543441	ATAT	[AAT, A]	{ATAT, AAT}	0.0178571	1	FALSE	TRUE	FALSE	0.0353925	56	0	1	55	AAT	splice_region_variant&intron_variant	LOW	F54D5.9	WBGene00010053	transcript	F54D5.9	protein_coding
II	11543442	T	[A]	{A, T}	0.0344828	1	TRUE	FALSE	FALSE	0.0671664	58	0	2	56	A	splice_region_variant&intron_variant	LOW	F54D5.9	WBGene00010053	transcript	F54D5.9	protein_coding
II	11543866	A	[G]	{G, A}	0.0769231	1	TRUE	FALSE	TRUE	0.143113	65	0	5	60	G	synonymous_variant	LOW	F54D5.9	WBGene00010053	transcript	F54D5.9	protein_coding
II	11543893	A	[G]	{G, A}	0.0153846	1	TRUE	FALSE	TRUE	0.0305307	65	0	1	64	G	synonymous_variant	LOW	F54D5.9	WBGene00010053	transcript	F54D5.9	protein_coding
II	11544043	G	[A]	{G, A}	0.0769231	1	TRUE	FALSE	TRUE	0.143113	65	0	5	60	A	synonymous_variant	LOW	F54D5.9	WBGene00010053	transcript	F54D5.9	protein_coding
II	11546212	T	[C]	{C, T}	0.893939	1	TRUE	FALSE	TRUE	0.191071	66	0	59	7	C	synonymous_variant	LOW	dnj-13	WBGene00001031	transcript	F54D5.8.1	protein_coding
II	11546428	A	[G]	{G, A}	0.893939	1	TRUE	FALSE	TRUE	0.191071	66	0	59	7	G	synonymous_variant	LOW	dnj-13	WBGene00001031	transcript	F54D5.8.1	protein_coding
II	11546677	C	[T]	{C, T}	0.333333	1	TRUE	FALSE	TRUE	0.447837	66	0	22	44	T	synonymous_variant	LOW	dnj-13	WBGene00001031	transcript	F54D5.8.1	protein_coding
II	11546780	A	[C]	{C, A}	0.0151515	1	TRUE	FALSE	FALSE	0.0300717	66	0	1	65	C	synonymous_variant	LOW	dnj-13	WBGene00001031	transcript	F54D5.8.1	protein_coding
II	11547548	A	[T]	{A, T}	0.121212	1	TRUE	FALSE	FALSE	0.214666	66	0	8	58	T	synonymous_variant	LOW	F54D5.7	WBGene00010052	transcript	F54D5.7.1	protein_coding
II	11548205	T	[G]	{G, T}	0.121212	1	TRUE	FALSE	FALSE	0.214666	66	0	8	58	G	synonymous_variant	LOW	F54D5.7	WBGene00010052	transcript	F54D5.7.1	protein_coding
II	11548286	C	[T]	{C, T}	0.0909091	1	TRUE	FALSE	TRUE	0.166551	66	0	6	60	T	synonymous_variant	LOW	F54D5.7	WBGene00010052	transcript	F54D5.7.1	protein_coding
II	11549062	G	[A]	{G, A}	0.0151515	1	TRUE	FALSE	TRUE	0.0300717	66	0	1	65	A	synonymous_variant	LOW	F54D5.7	WBGene00010052	transcript	F54D5.7.1	protein_coding
II	11557086	G	[A]	{G, A}	0.0151515	1	TRUE	FALSE	TRUE	0.0300717	66	0	1	65	A	synonymous_variant	LOW	F54D5.17	WBGene00195146	transcript	F54D5.17	protein_coding
II	11557161	T	[C]	{C, T}	0.0151515	1	TRUE	FALSE	TRUE	0.0300717	66	0	1	65	C	synonymous_variant	LOW	F54D5.17	WBGene00195146	transcript	F54D5.17	protein_coding
II	11558153	G	[A]	{G, A}	0.030303	1	TRUE	FALSE	TRUE	0.0592181	66	0	2	64	A	synonymous_variant	LOW	WBGene00271798	WBGene00271798	transcript	F54D5.24	protein_coding
II	11558893	T	[C]	{C, T}	0.0151515	1	TRUE	FALSE	TRUE	0.0300717	66	0	1	65	C	synonymous_variant	LOW	F54D5.15	WBGene00010057	transcript	F54D5.15a	protein_coding
II	11559105	G	[A]	{G, A}	0.166667	1	TRUE	FALSE	TRUE	0.279898	66	0	11	55	A	synonymous_variant	LOW	F54D5.15	WBGene00010057	transcript	F54D5.15a	protein_coding
II	11559150	T	[G]	{G, T}	0.0151515	1	TRUE	FALSE	FALSE	0.0300717	66	0	1	65	G	synonymous_variant	LOW	F54D5.15	WBGene00010057	transcript	F54D5.15a	protein_coding
II	11559240	C	[A]	{C, A}	0.166667	1	TRUE	FALSE	FALSE	0.279898	66	0	11	55	A	synonymous_variant	LOW	F54D5.15	WBGene00010057	transcript	F54D5.15a	protein_coding
II	11560188	C	[T]	{C, T}	0.151515	1	TRUE	FALSE	TRUE	0.259079	66	0	10	56	T	synonymous_variant	LOW	F54D5.15	WBGene00010057	transcript	F54D5.15a	protein_coding
II	11565438	G	[T]	{G, T}	0.0151515	1	TRUE	FALSE	FALSE	0.0300717	66	0	1	65	T	synonymous_variant	LOW	F54D5.5	WBGene00010051	transcript	F54D5.5b	protein_coding
II	11566045	A	[G]	{G, A}	0.0151515	1	TRUE	FALSE	TRUE	0.0300717	66	0	1	65	G	synonymous_variant	LOW	F54D5.5	WBGene00010051	transcript	F54D5.5b	protein_coding
II	11566102	G	[A]	{G, A}	0.0151515	1	TRUE	FALSE	TRUE	0.0300717	66	0	1	65	A	synonymous_variant	LOW	F54D5.5	WBGene00010051	transcript	F54D5.5b	protein_coding
II	11569177	A	[T]	{A, T}	0.166667	1	TRUE	FALSE	FALSE	0.279898	66	0	11	55	T	synonymous_variant	LOW	F54D5.23	WBGene00219434	transcript	F54D5.23	protein_coding
II	11570284	C	[T]	{C, T}	0.166667	1	TRUE	FALSE	TRUE	0.279898	66	0	11	55	T	splice_region_variant&intron_variant	LOW	F54D5.4	WBGene00010050	transcript	F54D5.4	protein_coding
II	11570858	T	[A]	{A, T}	0.0151515	1	TRUE	FALSE	FALSE	0.0300717	66	0	1	65	A	splice_region_variant&intron_variant	LOW	F54D5.4	WBGene00010050	transcript	F54D5.4	protein_coding
II	11572128	C	[T]	{C, T}	0.0151515	1	TRUE	FALSE	TRUE	0.0300717	66	0	1	65	T	synonymous_variant	LOW	F54D5.3	WBGene00010049	transcript	F54D5.3	protein_coding
II	11573319	A	[G]	{G, A}	0.153846	1	TRUE	FALSE	TRUE	0.262373	65	0	10	55	G	synonymous_variant	LOW	F54D5.2	WBGene00010048	transcript	F54D5.2	protein_coding
II	11574292	T	[A]	{A, T}	0.0923077	1	TRUE	FALSE	FALSE	0.168873	65	0	6	59	A	splice_region_variant&intron_variant	LOW	F54D5.2	WBGene00010048	transcript	F54D5.2	protein_coding
II	11575838	C	[T]	{C, T}	0.0454545	1	TRUE	FALSE	TRUE	0.0874393	66	0	3	63	T	synonymous_variant	LOW	pcs-1	WBGene00003960	transcript	F54D5.1a	protein_coding
II	11576192	A	[C]	{C, A}	0.257576	1	TRUE	FALSE	FALSE	0.385381	66	0	17	49	C	synonymous_variant	LOW	pcs-1	WBGene00003960	transcript	F54D5.1a	protein_coding
II	11576428	G	[GA]	{G, GA}	0.0151515	1	FALSE	TRUE	FALSE	0.0300717	66	0	1	65	GA	splice_region_variant&intron_variant	LOW	pcs-1	WBGene00003960	transcript	F54D5.1a	protein_coding
II	11578880	T	[C]	{C, T}	0.0151515	1	TRUE	FALSE	TRUE	0.0300717	66	0	1	65	C	splice_region_variant&intron_variant	LOW	smc-6	WBGene00010056	transcript	F54D5.14	protein_coding
II	11579231	C	[T]	{C, T}	0.0151515	1	TRUE	FALSE	TRUE	0.0300717	66	0	1	65	T	synonymous_variant	LOW	smc-6	WBGene00010056	transcript	F54D5.14	protein_coding
II	11579868	A	[C]	{C, A}	0.030303	1	TRUE	FALSE	FALSE	0.0592181	66	0	2	64	C	synonymous_variant	LOW	smc-6	WBGene00010056	transcript	F54D5.14	protein_coding
II	11580092	G	[A]	{G, A}	0.0151515	1	TRUE	FALSE	TRUE	0.0300717	66	0	1	65	A	synonymous_variant	LOW	smc-6	WBGene00010056	transcript	F54D5.14	protein_coding
II	11580558	C	[T]	{C, T}	0.151515	1	TRUE	FALSE	TRUE	0.259079	66	0	10	56	T	synonymous_variant	LOW	smc-6	WBGene00010056	transcript	F54D5.14	protein_coding
II	11580570	T	[C]	{C, T}	0.0151515	1	TRUE	FALSE	TRUE	0.0300717	66	0	1	65	C	synonymous_variant	LOW	smc-6	WBGene00010056	transcript	F54D5.14	protein_coding
II	11580630	G	[A]	{G, A}	0.0151515	1	TRUE	FALSE	TRUE	0.0300717	66	0	1	65	A	synonymous_variant	LOW	smc-6	WBGene00010056	transcript	F54D5.14	protein_coding
II	11580666	C	[A]	{C, A}	0.0909091	1	TRUE	FALSE	FALSE	0.166551	66	0	6	60	A	synonymous_variant	LOW	smc-6	WBGene00010056	transcript	F54D5.14	protein_coding
II	11580784	C	[T]	{C, T}	0.0909091	1	TRUE	FALSE	TRUE	0.166551	66	0	6	60	T	splice_region_variant&intron_variant	LOW	smc-6	WBGene00010056	transcript	F54D5.14	protein_coding
II	11581549	A	[T]	{A, T}	0.151515	1	TRUE	FALSE	FALSE	0.259079	66	0	10	56	T	synonymous_variant	LOW	smc-6	WBGene00010056	transcript	F54D5.14	protein_coding
II	11581735	C	[T]	{C, T}	0.0757576	1	TRUE	FALSE	TRUE	0.141106	66	0	5	61	T	synonymous_variant	LOW	smc-6	WBGene00010056	transcript	F54D5.14	protein_coding
II	11581786	G	[A]	{G, A}	0.0151515	1	TRUE	FALSE	TRUE	0.0300717	66	0	1	65	A	synonymous_variant	LOW	smc-6	WBGene00010056	transcript	F54D5.14	protein_coding
II	11581897	G	[A]	{G, A}	0.0151515	1	TRUE	FALSE	TRUE	0.0300717	66	0	1	65	A	synonymous_variant	LOW	smc-6	WBGene00010056	transcript	F54D5.14	protein_coding
II	11582068	G	[A]	{G, A}	0.0151515	1	TRUE	FALSE	TRUE	0.0300717	66	0	1	65	A	synonymous_variant	LOW	smc-6	WBGene00010056	transcript	F54D5.14	protein_coding
II	11582966	A	[G]	{G, A}	0.166667	1	TRUE	FALSE	TRUE	0.279898	66	0	11	55	G	synonymous_variant	LOW	D1043.1	WBGene00008361	transcript	D1043.1	protein_coding
II	11585729	T	[C]	{C, T}	0.0151515	1	TRUE	FALSE	TRUE	0.0300717	66	0	1	65	C	synonymous_variant	LOW	D1043.1	WBGene00008361	transcript	D1043.1	protein_coding
II	11585747	G	[A]	{G, A}	0.0151515	1	TRUE	FALSE	TRUE	0.0300717	66	0	1	65	A	synonymous_variant	LOW	D1043.1	WBGene00008361	transcript	D1043.1	protein_coding
II	11585996	A	[G]	{G, A}	0.0757576	1	TRUE	FALSE	TRUE	0.141106	66	0	5	61	G	synonymous_variant	LOW	D1043.1	WBGene00008361	transcript	D1043.1	protein_coding
II	11586086	G	[C]	{C, G}	0.0151515	1	TRUE	FALSE	FALSE	0.0300717	66	0	1	65	C	synonymous_variant	LOW	D1043.1	WBGene00008361	transcript	D1043.1	protein_coding
II	11586843	G	[T]	{G, T}	0.0151515	1	TRUE	FALSE	FALSE	0.0300717	66	0	1	65	T	synonymous_variant	LOW	D1043.1	WBGene00008361	transcript	D1043.1	protein_coding
II	11587236	A	[G]	{G, A}	0.0151515	1	TRUE	FALSE	TRUE	0.0300717	66	0	1	65	G	synonymous_variant	LOW	D1043.1	WBGene00008361	transcript	D1043.1	protein_coding
II	11587847	A	[AT]	{AT, A}	0.0151515	1	FALSE	TRUE	FALSE	0.0300717	66	0	1	65	AT	splice_region_variant&intron_variant	LOW	D1043.1	WBGene00008361	transcript	D1043.1	protein_coding
II	11588335	A	[G]	{G, A}	0.0151515	1	TRUE	FALSE	TRUE	0.0300717	66	0	1	65	G	synonymous_variant	LOW	D1043.1	WBGene00008361	transcript	D1043.1	protein_coding
II	11588641	A	[G]	{G, A}	0.772727	1	TRUE	FALSE	TRUE	0.353921	66	0	51	15	G	synonymous_variant	LOW	F07A11.1	WBGene00008545	transcript	F07A11.1	protein_coding
II	11588695	C	[G]	{C, G}	0.106061	1	TRUE	FALSE	FALSE	0.191071	66	0	7	59	G	splice_region_variant&intron_variant	LOW	F07A11.1	WBGene00008545	transcript	F07A11.1	protein_coding
II	11589218	A	[T]	{A, T}	0.0151515	1	TRUE	FALSE	FALSE	0.0300717	66	0	1	65	T	synonymous_variant	LOW	F07A11.1	WBGene00008545	transcript	F07A11.1	protein_coding
II	11589236	T	[C]	{C, T}	0.893939	1	TRUE	FALSE	TRUE	0.191071	66	0	59	7	C	synonymous_variant	LOW	F07A11.1	WBGene00008545	transcript	F07A11.1	protein_coding
II	11590444	T	[C]	{C, T}	0.030303	1	TRUE	FALSE	TRUE	0.0592181	66	0	2	64	C	synonymous_variant	LOW	F07A11.1	WBGene00008545	transcript	F07A11.1	protein_coding
II	11590543	C	[T]	{C, T}	0.0151515	1	TRUE	FALSE	TRUE	0.0300717	66	0	1	65	T	synonymous_variant	LOW	F07A11.1	WBGene00008545	transcript	F07A11.1	protein_coding
II	11590700	G	[A]	{G, A}	0.0151515	1	TRUE	FALSE	TRUE	0.0300717	66	0	1	65	A	synonymous_variant	LOW	F07A11.1	WBGene00008545	transcript	F07A11.1	protein_coding
II	11590764	A	[G]	{G, A}	0.0151515	1	TRUE	FALSE	TRUE	0.0300717	66	0	1	65	G	synonymous_variant	LOW	F07A11.1	WBGene00008545	transcript	F07A11.1	protein_coding
II	11591291	C	[G]	{C, G}	0.0151515	1	TRUE	FALSE	FALSE	0.0300717	66	0	1	65	G	synonymous_variant	LOW	F07A11.1	WBGene00008545	transcript	F07A11.1	protein_coding
II	11592740	T	[A]	{A, T}	0.0151515	1	TRUE	FALSE	FALSE	0.0300717	66	0	1	65	A	synonymous_variant	LOW	gfat-1	WBGene00008546	transcript	F07A11.2a.1	protein_coding
II	11593205	G	[A]	{G, A}	0.0151515	1	TRUE	FALSE	TRUE	0.0300717	66	0	1	65	A	synonymous_variant	LOW	gfat-1	WBGene00008546	transcript	F07A11.2a.1	protein_coding
II	11593289	A	[G]	{G, A}	0.151515	1	TRUE	FALSE	TRUE	0.259079	66	0	10	56	G	synonymous_variant	LOW	gfat-1	WBGene00008546	transcript	F07A11.2a.1	protein_coding
II	11593295	C	[A]	{C, A}	0.0757576	1	TRUE	FALSE	FALSE	0.141106	66	0	5	61	A	synonymous_variant	LOW	gfat-1	WBGene00008546	transcript	F07A11.2a.1	protein_coding
II	11593730	T	[C]	{C, T}	0.772727	1	TRUE	FALSE	TRUE	0.353921	66	0	51	15	C	synonymous_variant	LOW	gfat-1	WBGene00008546	transcript	F07A11.2a.1	protein_coding
II	11593895	G	[A]	{G, A}	0.151515	1	TRUE	FALSE	TRUE	0.259079	66	0	10	56	A	synonymous_variant	LOW	gfat-1	WBGene00008546	transcript	F07A11.2a.1	protein_coding
II	11594057	A	[T]	{A, T}	0.0151515	1	TRUE	FALSE	FALSE	0.0300717	66	0	1	65	T	synonymous_variant	LOW	gfat-1	WBGene00008546	transcript	F07A11.2a.1	protein_coding
II	11594317	C	[T]	{C, T}	0.151515	1	TRUE	FALSE	TRUE	0.259079	66	0	10	56	T	splice_region_variant&intron_variant	LOW	gfat-1	WBGene00008546	transcript	F07A11.2a.1	protein_coding
II	11595056	A	[G]	{G, A}	0.151515	1	TRUE	FALSE	TRUE	0.259079	66	0	10	56	G	synonymous_variant	LOW	gfat-1	WBGene00008546	transcript	F07A11.2a.1	protein_coding
II	11597228	T	[A]	{A, T}	0.0151515	1	TRUE	FALSE	FALSE	0.0300717	66	0	1	65	A	splice_region_variant&intron_variant	LOW	npp-5	WBGene00003791	transcript	F07A11.3	protein_coding
II	11597717	G	[C]	{C, G}	0.276923	1	TRUE	FALSE	FALSE	0.403578	65	0	18	47	C	synonymous_variant	LOW	npp-5	WBGene00003791	transcript	F07A11.3	protein_coding
II	11597915	T	[A]	{A, T}	0.015625	1	TRUE	FALSE	FALSE	0.0310039	64	0	1	63	A	synonymous_variant	LOW	npp-5	WBGene00003791	transcript	F07A11.3	protein_coding
II	11598195	A	[T]	{A, T}	0.03125	1	TRUE	FALSE	FALSE	0.0610236	64	0	2	62	T	splice_region_variant&intron_variant	LOW	npp-5	WBGene00003791	transcript	F07A11.3	protein_coding
II	11598405	G	[C]	{C, G}	0.0153846	1	TRUE	FALSE	FALSE	0.0305307	65	0	1	64	C	synonymous_variant	LOW	npp-5	WBGene00003791	transcript	F07A11.3	protein_coding
II	11598525	G	[A]	{G, A}	0.0769231	1	TRUE	FALSE	TRUE	0.143113	65	0	5	60	A	synonymous_variant	LOW	npp-5	WBGene00003791	transcript	F07A11.3	protein_coding
II	11598618	C	[T]	{C, T}	0.0461538	1	TRUE	FALSE	TRUE	0.0887299	65	0	3	62	T	synonymous_variant	LOW	npp-5	WBGene00003791	transcript	F07A11.3	protein_coding
II	11598651	T	[G]	{G, T}	0.212121	1	TRUE	FALSE	FALSE	0.336803	66	0	14	52	G	synonymous_variant	LOW	npp-5	WBGene00003791	transcript	F07A11.3	protein_coding
II	11598765	A	[G]	{G, A}	0.166667	1	TRUE	FALSE	TRUE	0.279898	66	0	11	55	G	synonymous_variant	LOW	npp-5	WBGene00003791	transcript	F07A11.3	protein_coding
II	11598801	T	[C]	{C, T}	0.0454545	1	TRUE	FALSE	TRUE	0.0874393	66	0	3	63	C	synonymous_variant	LOW	npp-5	WBGene00003791	transcript	F07A11.3	protein_coding
II	11599318	A	[G]	{G, A}	0.181818	1	TRUE	FALSE	TRUE	0.299792	66	0	12	54	G	synonymous_variant	LOW	npp-5	WBGene00003791	transcript	F07A11.3	protein_coding
II	11599323	A	[G]	{G, A}	0.0757576	1	TRUE	FALSE	TRUE	0.141106	66	0	5	61	G	synonymous_variant	LOW	npp-5	WBGene00003791	transcript	F07A11.3	protein_coding
II	11599348	T	[C]	{C, T}	0.0757576	1	TRUE	FALSE	TRUE	0.141106	66	0	5	61	C	synonymous_variant	LOW	npp-5	WBGene00003791	transcript	F07A11.3	protein_coding
II	11599485	GA	[G]	{G, GA}	0.0454545	1	FALSE	TRUE	FALSE	0.0874393	66	0	3	63	G	splice_region_variant&intron_variant	LOW	npp-5	WBGene00003791	transcript	F07A11.3	protein_coding
II	11599704	T	[C]	{C, T}	0.0151515	1	TRUE	FALSE	TRUE	0.0300717	66	0	1	65	C	synonymous_variant	LOW	npp-5	WBGene00003791	transcript	F07A11.3	protein_coding
II	11606009	T	[C]	{C, T}	0.136364	1	TRUE	FALSE	TRUE	0.237335	66	0	9	57	C	synonymous_variant	LOW	F07A11.4	WBGene00008547	transcript	F07A11.4a	protein_coding
II	11606171	T	[C]	{C, T}	0.0151515	1	TRUE	FALSE	TRUE	0.0300717	66	0	1	65	C	synonymous_variant	LOW	F07A11.4	WBGene00008547	transcript	F07A11.4a	protein_coding
II	11606213	T	[A]	{A, T}	0.181818	1	TRUE	FALSE	FALSE	0.299792	66	0	12	54	A	synonymous_variant	LOW	F07A11.4	WBGene00008547	transcript	F07A11.4a	protein_coding
II	11606316	GT	[G]	{G, GT}	0.265152	1	FALSE	TRUE	FALSE	0.392667	66	1	17	48	G	splice_region_variant&intron_variant	LOW	F07A11.4	WBGene00008547	transcript	F07A11.4a	protein_coding
II	11606885	C	[T]	{C, T}	0.0151515	1	TRUE	FALSE	TRUE	0.0300717	66	0	1	65	T	synonymous_variant	LOW	F07A11.4	WBGene00008547	transcript	F07A11.4a	protein_coding
II	11606987	A	[G]	{G, A}	0.409091	1	TRUE	FALSE	TRUE	0.487162	66	0	27	39	G	synonymous_variant	LOW	F07A11.4	WBGene00008547	transcript	F07A11.4a	protein_coding
II	11607766	T	[A]	{A, T}	0.0151515	1	TRUE	FALSE	FALSE	0.0300717	66	0	1	65	A	synonymous_variant	LOW	F07A11.4	WBGene00008547	transcript	F07A11.4a	protein_coding
II	11608676	A	[G]	{G, A}	0.0151515	1	TRUE	FALSE	TRUE	0.0300717	66	0	1	65	G	splice_region_variant&intron_variant	LOW	F07A11.4	WBGene00008547	transcript	F07A11.4a	protein_coding
II	11608893	A	[G]	{G, A}	0.0151515	1	TRUE	FALSE	TRUE	0.0300717	66	0	1	65	G	synonymous_variant	LOW	F07A11.4	WBGene00008547	transcript	F07A11.4a	protein_coding
II	11609259	T	[G]	{G, T}	0.030303	1	TRUE	FALSE	FALSE	0.0592181	66	0	2	64	G	synonymous_variant	LOW	F07A11.4	WBGene00008547	transcript	F07A11.4a	protein_coding
II	11609403	A	[G]	{G, A}	0.166667	1	TRUE	FALSE	TRUE	0.279898	66	0	11	55	G	synonymous_variant	LOW	F07A11.4	WBGene00008547	transcript	F07A11.4b	protein_coding
II	11609643	T	[C]	{C, T}	0.848485	1	TRUE	FALSE	TRUE	0.259079	66	0	56	10	C	synonymous_variant	LOW	F07A11.4	WBGene00008547	transcript	F07A11.4a	protein_coding
II	11609844	C	[T]	{C, T}	0.0151515	1	TRUE	FALSE	TRUE	0.0300717	66	0	1	65	T	synonymous_variant	LOW	F07A11.4	WBGene00008547	transcript	F07A11.4a	protein_coding
II	11610199	T	[A]	{A, T}	0.0151515	1	TRUE	FALSE	FALSE	0.0300717	66	0	1	65	A	synonymous_variant	LOW	F07A11.4	WBGene00008547	transcript	F07A11.4a	protein_coding
II	11610367	C	[T]	{C, T}	0.166667	1	TRUE	FALSE	TRUE	0.279898	66	0	11	55	T	synonymous_variant	LOW	F07A11.4	WBGene00008547	transcript	F07A11.4a	protein_coding
II	11610385	T	[C]	{C, T}	0.166667	1	TRUE	FALSE	TRUE	0.279898	66	0	11	55	C	synonymous_variant	LOW	F07A11.4	WBGene00008547	transcript	F07A11.4a	protein_coding
II	11612496	G	[A]	{G, A}	0.0606061	1	TRUE	FALSE	TRUE	0.114735	66	0	4	62	A	synonymous_variant	LOW	F07A11.5	WBGene00008548	transcript	F07A11.5	protein_coding
II	11612715	A	[G]	{G, A}	0.166667	1	TRUE	FALSE	TRUE	0.279898	66	0	11	55	G	synonymous_variant	LOW	F07A11.5	WBGene00008548	transcript	F07A11.5	protein_coding
II	11613402	A	[G]	{G, A}	0.166667	1	TRUE	FALSE	TRUE	0.279898	66	0	11	55	G	synonymous_variant	LOW	F07A11.5	WBGene00008548	transcript	F07A11.5	protein_coding
II	11613579	G	[A]	{G, A}	0.151515	1	TRUE	FALSE	TRUE	0.259079	66	0	10	56	A	synonymous_variant	LOW	F07A11.5	WBGene00008548	transcript	F07A11.5	protein_coding
II	11614390	C	[T]	{C, T}	0.166667	1	TRUE	FALSE	TRUE	0.279898	66	0	11	55	T	splice_region_variant	LOW	F07A11.5	WBGene00008548	transcript	F07A11.5	protein_coding
II	11615877	G	[A]	{G, A}	0.171875	1	TRUE	FALSE	TRUE	0.286909	64	0	11	53	A	synonymous_variant	LOW	din-1	WBGene00008549	transcript	F07A11.6b	protein_coding
II	11615980	C	[T]	{C, T}	0.0769231	1	TRUE	FALSE	TRUE	0.143113	65	0	5	60	T	synonymous_variant	LOW	din-1	WBGene00008549	transcript	F07A11.6b	protein_coding
II	11616001	A	[G]	{G, A}	0.0153846	1	TRUE	FALSE	TRUE	0.0305307	65	0	1	64	G	synonymous_variant	LOW	din-1	WBGene00008549	transcript	F07A11.6b	protein_coding
II	11616991	T	[C]	{C, T}	0.0923077	1	TRUE	FALSE	TRUE	0.168873	65	0	6	59	C	synonymous_variant	LOW	din-1	WBGene00008549	transcript	F07A11.6b	protein_coding
II	11617078	A	[G]	{G, A}	0.107692	1	TRUE	FALSE	TRUE	0.193679	65	0	7	58	G	synonymous_variant	LOW	din-1	WBGene00008549	transcript	F07A11.6b	protein_coding
II	11618019	G	[A]	{G, A}	0.0153846	1	TRUE	FALSE	TRUE	0.0305307	65	0	1	64	A	synonymous_variant	LOW	din-1	WBGene00008549	transcript	F07A11.6d.2	protein_coding
II	11618241	C	[G]	{C, G}	0.0153846	1	TRUE	FALSE	FALSE	0.0305307	65	0	1	64	G	synonymous_variant	LOW	din-1	WBGene00008549	transcript	F07A11.6d.2	protein_coding
II	11618567	A	[G]	{G, A}	0.169231	1	TRUE	FALSE	TRUE	0.283363	65	0	11	54	G	synonymous_variant	LOW	din-1	WBGene00008549	transcript	F07A11.6d.2	protein_coding
II	11618595	G	[A]	{G, A}	0.107692	1	TRUE	FALSE	TRUE	0.193679	65	0	7	58	A	synonymous_variant	LOW	din-1	WBGene00008549	transcript	F07A11.6d.2	protein_coding
II	11618814	T	[C]	{C, T}	0.0153846	1	TRUE	FALSE	TRUE	0.0305307	65	0	1	64	C	synonymous_variant	LOW	din-1	WBGene00008549	transcript	F07A11.6d.2	protein_coding
II	11622644	C	[A]	{C, A}	0.0923077	1	TRUE	FALSE	FALSE	0.168873	65	0	6	59	A	synonymous_variant	LOW	din-1	WBGene00008549	transcript	F07A11.6b	protein_coding
II	11622713	C	[A]	{C, A}	0.153846	1	TRUE	FALSE	FALSE	0.262373	65	0	10	55	A	synonymous_variant	LOW	din-1	WBGene00008549	transcript	F07A11.6b	protein_coding
II	11623142	C	[T]	{C, T}	0.153846	1	TRUE	FALSE	TRUE	0.262373	65	0	10	55	T	synonymous_variant	LOW	din-1	WBGene00008549	transcript	F07A11.6b	protein_coding
II	11623451	C	[T]	{C, T}	0.523077	1	TRUE	FALSE	TRUE	0.502803	65	0	34	31	T	synonymous_variant	LOW	din-1	WBGene00008549	transcript	F07A11.6b	protein_coding
II	11623684	C	[CCA]	{C, CCA}	0.0153846	1	FALSE	TRUE	FALSE	0.0305307	65	0	1	64	CCA	splice_region_variant&intron_variant	LOW	din-1	WBGene00008549	transcript	F07A11.6b	protein_coding
II	11624041	T	[C]	{C, T}	0.0923077	1	TRUE	FALSE	TRUE	0.168873	65	0	6	59	C	synonymous_variant	LOW	din-1	WBGene00008549	transcript	F07A11.6b	protein_coding
II	11624374	A	[C]	{C, A}	0.0923077	1	TRUE	FALSE	FALSE	0.168873	65	0	6	59	C	synonymous_variant	LOW	din-1	WBGene00008549	transcript	F07A11.6b	protein_coding
II	11624770	G	[A]	{G, A}	0.0153846	1	TRUE	FALSE	TRUE	0.0305307	65	0	1	64	A	synonymous_variant	LOW	din-1	WBGene00008549	transcript	F07A11.6b	protein_coding
II	11625058	A	[G]	{G, A}	0.0153846	1	TRUE	FALSE	TRUE	0.0305307	65	0	1	64	G	synonymous_variant	LOW	din-1	WBGene00008549	transcript	F07A11.6b	protein_coding
II	11625181	C	[T]	{C, T}	0.0153846	1	TRUE	FALSE	TRUE	0.0305307	65	0	1	64	T	synonymous_variant	LOW	din-1	WBGene00008549	transcript	F07A11.6b	protein_coding
II	11625786	A	[G]	{G, A}	0.015873	1	TRUE	FALSE	TRUE	0.0314921	63	0	1	62	G	synonymous_variant	LOW	din-1	WBGene00008549	transcript	F07A11.6b	protein_coding
II	11625974	G	[T]	{G, T}	0.0952381	1	TRUE	FALSE	FALSE	0.173714	63	0	6	57	T	synonymous_variant	LOW	din-1	WBGene00008549	transcript	F07A11.6b	protein_coding
II	11626038	T	[C]	{C, T}	0.861538	1	TRUE	FALSE	TRUE	0.240429	65	0	56	9	C	synonymous_variant	LOW	din-1	WBGene00008549	transcript	F07A11.6b	protein_coding
II	11626152	C	[T]	{C, T}	0.0153846	1	TRUE	FALSE	TRUE	0.0305307	65	0	1	64	T	synonymous_variant	LOW	din-1	WBGene00008549	transcript	F07A11.6b	protein_coding
II	11626155	A	[G]	{G, A}	0.0153846	1	TRUE	FALSE	TRUE	0.0305307	65	0	1	64	G	synonymous_variant	LOW	din-1	WBGene00008549	transcript	F07A11.6b	protein_coding
II	11626413	G	[A]	{G, A}	0.0769231	1	TRUE	FALSE	TRUE	0.143113	65	0	5	60	A	synonymous_variant	LOW	din-1	WBGene00008549	transcript	F07A11.6b	protein_coding
II	11626455	T	[C]	{C, T}	0.0307692	1	TRUE	FALSE	TRUE	0.0601073	65	0	2	63	C	synonymous_variant	LOW	din-1	WBGene00008549	transcript	F07A11.6b	protein_coding
II	11626512	A	[G]	{G, A}	0.169231	1	TRUE	FALSE	TRUE	0.283363	65	0	11	54	G	synonymous_variant	LOW	din-1	WBGene00008549	transcript	F07A11.6b	protein_coding
II	11626569	T	[G]	{G, T}	0.0307692	1	TRUE	FALSE	FALSE	0.0601073	65	0	2	63	G	synonymous_variant	LOW	din-1	WBGene00008549	transcript	F07A11.6b	protein_coding
II	11626871	G	[GA]	{G, GA}	0.0461538	1	FALSE	TRUE	FALSE	0.0887299	65	0	3	62	GA	splice_region_variant&intron_variant	LOW	din-1	WBGene00008549	transcript	F07A11.6b	protein_coding
II	11627928	A	[G]	{G, A}	0.0153846	1	TRUE	FALSE	TRUE	0.0305307	65	0	1	64	G	synonymous_variant	LOW	din-1	WBGene00008549	transcript	F07A11.6b	protein_coding
II	11630689	C	[G]	{C, G}	0.0153846	1	TRUE	FALSE	FALSE	0.0305307	65	0	1	64	G	synonymous_variant	LOW	din-1	WBGene00008549	transcript	F07A11.6b	protein_coding
II	11631872	G	[A]	{G, A}	0.0461538	1	TRUE	FALSE	TRUE	0.0887299	65	0	3	62	A	synonymous_variant	LOW	din-1	WBGene00008549	transcript	F07A11.6b	protein_coding
II	11633031	A	[G]	{G, A}	0.169231	1	TRUE	FALSE	TRUE	0.283363	65	0	11	54	G	synonymous_variant	LOW	din-1	WBGene00008549	transcript	F07A11.6b	protein_coding
II	11633275	G	[A]	{G, A}	0.184615	1	TRUE	FALSE	TRUE	0.303399	65	0	12	53	A	synonymous_variant	LOW	din-1	WBGene00008549	transcript	F07A11.6b	protein_coding
II	11633419	A	[G]	{G, A}	0.138462	1	TRUE	FALSE	TRUE	0.240429	65	0	9	56	G	synonymous_variant	LOW	din-1	WBGene00008549	transcript	F07A11.6b	protein_coding
II	11640535	C	[T]	{C, T}	0.0769231	1	TRUE	FALSE	TRUE	0.143113	65	0	5	60	T	splice_region_variant&intron_variant	LOW	kin-6	WBGene00002194	transcript	ZK20.2	protein_coding
II	11641463	A	[G]	{G, A}	0.0615385	1	TRUE	FALSE	TRUE	0.116398	65	0	4	61	G	synonymous_variant	LOW	kin-6	WBGene00002194	transcript	ZK20.2	protein_coding
II	11647810	C	[T]	{C, T}	0.169231	1	TRUE	FALSE	TRUE	0.283363	65	0	11	54	T	synonymous_variant	LOW	ghi-1	WBGene00013923	transcript	ZK20.1	protein_coding
II	11648210	A	[T]	{A, T}	0.769231	1	TRUE	FALSE	FALSE	0.357782	65	0	50	15	T	synonymous_variant	LOW	ghi-1	WBGene00013923	transcript	ZK20.1	protein_coding
II	11648384	T	[C]	{C, T}	0.907692	1	TRUE	FALSE	TRUE	0.168873	65	0	59	6	C	synonymous_variant	LOW	ghi-1	WBGene00013923	transcript	ZK20.1	protein_coding
II	11648714	A	[G]	{G, A}	0.184615	1	TRUE	FALSE	TRUE	0.303399	65	0	12	53	G	synonymous_variant	LOW	ghi-1	WBGene00013923	transcript	ZK20.1	protein_coding
II	11648844	C	[A]	{C, A}	0.0153846	1	TRUE	FALSE	FALSE	0.0305307	65	0	1	64	A	synonymous_variant	LOW	ghi-1	WBGene00013923	transcript	ZK20.1	protein_coding
II	11649229	C	[T]	{C, T}	0.0307692	1	TRUE	FALSE	TRUE	0.0601073	65	0	2	63	T	synonymous_variant	LOW	ZK20.4	WBGene00013925	transcript	ZK20.4a.1	protein_coding
II	11649370	A	[G]	{G, A}	0.0153846	1	TRUE	FALSE	TRUE	0.0305307	65	0	1	64	G	synonymous_variant	LOW	ZK20.4	WBGene00013925	transcript	ZK20.4a.1	protein_coding
II	11651782	C	[T]	{C, T}	0.0153846	1	TRUE	FALSE	TRUE	0.0305307	65	0	1	64	T	synonymous_variant	LOW	rad-23	WBGene00013924	transcript	ZK20.3.1	protein_coding
II	11652094	C	[T]	{C, T}	0.0153846	1	TRUE	FALSE	TRUE	0.0305307	65	0	1	64	T	synonymous_variant	LOW	rad-23	WBGene00013924	transcript	ZK20.3.1	protein_coding
II	11652415	C	[A]	{C, A}	0.0923077	1	TRUE	FALSE	FALSE	0.168873	65	0	6	59	A	synonymous_variant	LOW	rad-23	WBGene00013924	transcript	ZK20.3.1	protein_coding
II	11652479	TAA	[TA, T, TAAA]	{TAA, TA, T}	0.353846	1	FALSE	TRUE	FALSE	0.460823	65	0	23	42	T	splice_region_variant&intron_variant	LOW	rad-23	WBGene00013924	transcript	ZK20.3.1	protein_coding
II	11652617	G	[T]	{G, T}	0.0769231	1	TRUE	FALSE	FALSE	0.143113	65	0	5	60	T	splice_region_variant&intron_variant	LOW	rad-23	WBGene00013924	transcript	ZK20.3.1	protein_coding
II	11653150	T	[C]	{C, T}	0.0769231	1	TRUE	FALSE	TRUE	0.143113	65	0	5	60	C	synonymous_variant	LOW	rpn-12	WBGene00004468	transcript	ZK20.5.1	protein_coding
II	11653293	T	[C]	{C, T}	0.0307692	1	TRUE	FALSE	TRUE	0.0601073	65	0	2	63	C	synonymous_variant	LOW	rpn-12	WBGene00004468	transcript	ZK20.5.1	protein_coding
II	11653384	G	[T]	{G, T}	0.0153846	1	TRUE	FALSE	FALSE	0.0305307	65	0	1	64	T	synonymous_variant	LOW	rpn-12	WBGene00004468	transcript	ZK20.5.1	protein_coding
II	11654063	C	[T]	{C, T}	0.184615	1	TRUE	FALSE	TRUE	0.303399	65	0	12	53	T	synonymous_variant	LOW	rpn-12	WBGene00004468	transcript	ZK20.5.1	protein_coding
II	11655651	C	[T]	{C, T}	0.323077	1	TRUE	FALSE	TRUE	0.440787	65	0	21	44	T	synonymous_variant	LOW	nep-1	WBGene00013926	transcript	ZK20.6	protein_coding
II	11656469	G	[A]	{G, A}	0.153846	1	TRUE	FALSE	TRUE	0.262373	65	0	10	55	A	synonymous_variant	LOW	nep-1	WBGene00013926	transcript	ZK20.6	protein_coding
II	11662366	G	[A]	{G, A}	0.0151515	1	TRUE	FALSE	TRUE	0.0300717	66	0	1	65	A	synonymous_variant	LOW	trr-1	WBGene00007028	transcript	C47D12.1a	protein_coding
II	11662484	A	[AT]	{AT, A}	0.181818	1	FALSE	TRUE	FALSE	0.299792	66	0	12	54	AT	splice_region_variant&intron_variant	LOW	trr-1	WBGene00007028	transcript	C47D12.1a	protein_coding
II	11662627	G	[A]	{G, A}	0.0151515	1	TRUE	FALSE	TRUE	0.0300717	66	0	1	65	A	synonymous_variant	LOW	trr-1	WBGene00007028	transcript	C47D12.1a	protein_coding
II	11663137	G	[A]	{G, A}	0.0757576	1	TRUE	FALSE	TRUE	0.141106	66	0	5	61	A	synonymous_variant	LOW	trr-1	WBGene00007028	transcript	C47D12.1a	protein_coding
II	11663152	G	[A]	{G, A}	0.0151515	1	TRUE	FALSE	TRUE	0.0300717	66	0	1	65	A	synonymous_variant	LOW	trr-1	WBGene00007028	transcript	C47D12.1a	protein_coding
II	11663626	C	[T]	{C, T}	0.0151515	1	TRUE	FALSE	TRUE	0.0300717	66	0	1	65	T	synonymous_variant	LOW	trr-1	WBGene00007028	transcript	C47D12.1a	protein_coding
II	11664071	A	[C]	{C, A}	0.0151515	1	TRUE	FALSE	FALSE	0.0300717	66	0	1	65	C	synonymous_variant	LOW	trr-1	WBGene00007028	transcript	C47D12.1a	protein_coding
II	11665826	A	[G]	{G, A}	0.0151515	1	TRUE	FALSE	TRUE	0.0300717	66	0	1	65	G	synonymous_variant	LOW	trr-1	WBGene00007028	transcript	C47D12.1a	protein_coding
II	11665871	G	[A]	{G, A}	0.0757576	1	TRUE	FALSE	TRUE	0.141106	66	0	5	61	A	synonymous_variant	LOW	trr-1	WBGene00007028	transcript	C47D12.1a	protein_coding
II	11667024	T	[C]	{C, T}	0.0909091	1	TRUE	FALSE	TRUE	0.166551	66	0	6	60	C	synonymous_variant	LOW	trr-1	WBGene00007028	transcript	C47D12.1a	protein_coding
II	11667555	C	[T]	{C, T}	0.0151515	1	TRUE	FALSE	TRUE	0.0300717	66	0	1	65	T	synonymous_variant	LOW	trr-1	WBGene00007028	transcript	C47D12.1a	protein_coding
II	11667933	T	[A]	{A, T}	0.0606061	1	TRUE	FALSE	FALSE	0.114735	66	0	4	62	A	splice_region_variant&intron_variant	LOW	trr-1	WBGene00007028	transcript	C47D12.1a	protein_coding
II	11668041	C	[A]	{C, A}	0.0151515	1	TRUE	FALSE	FALSE	0.0300717	66	0	1	65	A	synonymous_variant	LOW	trr-1	WBGene00007028	transcript	C47D12.1a	protein_coding
II	11668893	G	[A]	{G, A}	0.0909091	1	TRUE	FALSE	TRUE	0.166551	66	0	6	60	A	synonymous_variant	LOW	trr-1	WBGene00007028	transcript	C47D12.1a	protein_coding
II	11670476	G	[A]	{G, A}	0.0151515	1	TRUE	FALSE	TRUE	0.0300717	66	0	1	65	A	synonymous_variant	LOW	trr-1	WBGene00007028	transcript	C47D12.1a	protein_coding
II	11670530	G	[A]	{G, A}	0.0151515	1	TRUE	FALSE	TRUE	0.0300717	66	0	1	65	A	synonymous_variant	LOW	trr-1	WBGene00007028	transcript	C47D12.1a	protein_coding
II	11670752	T	[C]	{C, T}	0.0454545	1	TRUE	FALSE	TRUE	0.0874393	66	0	3	63	C	synonymous_variant	LOW	trr-1	WBGene00007028	transcript	C47D12.1a	protein_coding
II	11671757	A	[G]	{G, A}	0.0454545	1	TRUE	FALSE	TRUE	0.0874393	66	0	3	63	G	synonymous_variant	LOW	trr-1	WBGene00007028	transcript	C47D12.1a	protein_coding
II	11671955	C	[T]	{C, T}	0.0151515	1	TRUE	FALSE	TRUE	0.0300717	66	0	1	65	T	synonymous_variant	LOW	trr-1	WBGene00007028	transcript	C47D12.1a	protein_coding
II	11672450	C	[G]	{C, G}	0.0151515	1	TRUE	FALSE	FALSE	0.0300717	66	0	1	65	G	synonymous_variant	LOW	trr-1	WBGene00007028	transcript	C47D12.1a	protein_coding
II	11673855	G	[T]	{G, T}	0.0151515	1	TRUE	FALSE	FALSE	0.0300717	66	0	1	65	T	synonymous_variant	LOW	trr-1	WBGene00007028	transcript	C47D12.1a	protein_coding
II	11674085	G	[A]	{G, A}	0.0151515	1	TRUE	FALSE	TRUE	0.0300717	66	0	1	65	A	synonymous_variant	LOW	trr-1	WBGene00007028	transcript	C47D12.1a	protein_coding
II	11674323	A	[C]	{C, A}	0.0151515	1	TRUE	FALSE	FALSE	0.0300717	66	0	1	65	C	splice_region_variant&intron_variant	LOW	trr-1	WBGene00007028	transcript	C47D12.1a	protein_coding
II	11674661	G	[A]	{G, A}	0.0151515	1	TRUE	FALSE	TRUE	0.0300717	66	0	1	65	A	synonymous_variant	LOW	trr-1	WBGene00007028	transcript	C47D12.1a	protein_coding
II	11674834	G	[A]	{G, A}	0.0151515	1	TRUE	FALSE	TRUE	0.0300717	66	0	1	65	A	splice_region_variant&intron_variant	LOW	trr-1	WBGene00007028	transcript	C47D12.1a	protein_coding
II	11675468	T	[C]	{C, T}	0.0151515	1	TRUE	FALSE	TRUE	0.0300717	66	0	1	65	C	synonymous_variant	LOW	trr-1	WBGene00007028	transcript	C47D12.1a	protein_coding
II	11675513	G	[T]	{G, T}	0.0757576	1	TRUE	FALSE	FALSE	0.141106	66	0	5	61	T	synonymous_variant	LOW	trr-1	WBGene00007028	transcript	C47D12.1a	protein_coding
II	11676327	C	[T]	{C, T}	0.0151515	1	TRUE	FALSE	TRUE	0.0300717	66	0	1	65	T	synonymous_variant	LOW	C47D12.2	WBGene00008136	transcript	C47D12.2	protein_coding
II	11676369	C	[T]	{C, T}	0.0151515	1	TRUE	FALSE	TRUE	0.0300717	66	0	1	65	T	synonymous_variant	LOW	C47D12.2	WBGene00008136	transcript	C47D12.2	protein_coding
II	11676496	G	[T]	{G, T}	0.0151515	1	TRUE	FALSE	FALSE	0.0300717	66	0	1	65	T	splice_region_variant&intron_variant	LOW	C47D12.2	WBGene00008136	transcript	C47D12.2	protein_coding
II	11676888	A	[G]	{G, A}	0.0454545	1	TRUE	FALSE	TRUE	0.0874393	66	0	3	63	G	synonymous_variant	LOW	C47D12.2	WBGene00008136	transcript	C47D12.2	protein_coding
II	11677448	C	[T]	{C, T}	0.0153846	1	TRUE	FALSE	TRUE	0.0305307	65	0	1	64	T	synonymous_variant	LOW	C47D12.2	WBGene00008136	transcript	C47D12.2	protein_coding
II	11678633	T	[G]	{G, T}	0.171875	1	TRUE	FALSE	FALSE	0.286909	64	0	11	53	G	synonymous_variant	LOW	C47D12.2	WBGene00008136	transcript	C47D12.2	protein_coding
II	11678723	C	[T]	{C, T}	0.015625	1	TRUE	FALSE	TRUE	0.0310039	64	0	1	63	T	synonymous_variant	LOW	C47D12.2	WBGene00008136	transcript	C47D12.2	protein_coding
II	11679091	C	[A]	{C, A}	0.015625	1	TRUE	FALSE	FALSE	0.0310039	64	0	1	63	A	splice_region_variant	LOW	sfxn-1.4	WBGene00008137	transcript	C47D12.3a	protein_coding
II	11679792	C	[T]	{C, T}	0.046875	1	TRUE	FALSE	TRUE	0.0900591	64	0	3	61	T	synonymous_variant	LOW	sfxn-1.4	WBGene00008137	transcript	C47D12.3a	protein_coding
II	11679822	G	[A]	{G, A}	0.015625	1	TRUE	FALSE	TRUE	0.0310039	64	0	1	63	A	synonymous_variant	LOW	sfxn-1.4	WBGene00008137	transcript	C47D12.3a	protein_coding
II	11681902	T	[A]	{A, T}	0.484375	1	TRUE	FALSE	FALSE	0.503445	64	0	31	33	A	synonymous_variant	LOW	C47D12.4	WBGene00008138	transcript	C47D12.4	protein_coding
II	11682061	T	[C]	{C, T}	0.138462	1	TRUE	FALSE	TRUE	0.240429	65	0	9	56	C	synonymous_variant	LOW	C47D12.4	WBGene00008138	transcript	C47D12.4	protein_coding
II	11682121	G	[A]	{G, A}	0.0461538	1	TRUE	FALSE	TRUE	0.0887299	65	0	3	62	A	synonymous_variant	LOW	C47D12.4	WBGene00008138	transcript	C47D12.4	protein_coding
II	11682651	T	[A]	{A, T}	0.0769231	1	TRUE	FALSE	FALSE	0.143113	65	0	5	60	A	splice_region_variant&intron_variant	LOW	C47D12.4	WBGene00008138	transcript	C47D12.4	protein_coding
II	11682701	C	[A]	{C, A}	0.0153846	1	TRUE	FALSE	FALSE	0.0305307	65	0	1	64	A	synonymous_variant	LOW	C47D12.4	WBGene00008138	transcript	C47D12.4	protein_coding
II	11682752	C	[T]	{C, T}	0.0153846	1	TRUE	FALSE	TRUE	0.0305307	65	0	1	64	T	synonymous_variant	LOW	C47D12.4	WBGene00008138	transcript	C47D12.4	protein_coding
II	11684096	A	[G]	{G, A}	0.138462	1	TRUE	FALSE	TRUE	0.240429	65	0	9	56	G	synonymous_variant	LOW	C47D12.5	WBGene00008139	transcript	C47D12.5	protein_coding
II	11689181	C	[T]	{C, T}	0.0153846	1	TRUE	FALSE	TRUE	0.0305307	65	0	1	64	T	splice_region_variant&synonymous_variant	LOW	kel-1	WBGene00002184	transcript	C47D12.7a	protein_coding
II	11691100	C	[T]	{C, T}	0.046875	1	TRUE	FALSE	TRUE	0.0900591	64	0	3	61	T	synonymous_variant	LOW	kel-1	WBGene00002184	transcript	C47D12.7a	protein_coding
II	11691208	A	[G]	{G, A}	0.25	1	TRUE	FALSE	TRUE	0.377953	64	0	16	48	G	synonymous_variant	LOW	kel-1	WBGene00002184	transcript	C47D12.7a	protein_coding
II	11692323	C	[A]	{C, A}	0.753846	1	TRUE	FALSE	FALSE	0.374001	65	0	49	16	A	synonymous_variant	LOW	tars-1	WBGene00006617	transcript	C47D12.6a	protein_coding
II	11692728	C	[T]	{C, T}	0.0153846	1	TRUE	FALSE	TRUE	0.0305307	65	0	1	64	T	synonymous_variant	LOW	tars-1	WBGene00006617	transcript	C47D12.6a	protein_coding
II	11693319	G	[A]	{G, A}	0.0153846	1	TRUE	FALSE	TRUE	0.0305307	65	0	1	64	A	synonymous_variant	LOW	tars-1	WBGene00006617	transcript	C47D12.6a	protein_coding
II	11693775	C	[T]	{C, T}	0.323077	1	TRUE	FALSE	TRUE	0.440787	65	0	21	44	T	synonymous_variant	LOW	tars-1	WBGene00006617	transcript	C47D12.6a	protein_coding
II	11694696	T	[G]	{G, T}	0.0153846	1	TRUE	FALSE	FALSE	0.0305307	65	0	1	64	G	5_prime_UTR_premature_start_codon_gain_variant	LOW	kel-1	WBGene00002184	transcript	C47D12.7b	protein_coding
II	11694854	C	[T]	{C, T}	0.0153846	1	TRUE	FALSE	TRUE	0.0305307	65	0	1	64	T	synonymous_variant	LOW	kel-1	WBGene00002184	transcript	C47D12.7a	protein_coding
II	11695184	G	[A]	{G, A}	0.0153846	1	TRUE	FALSE	TRUE	0.0305307	65	0	1	64	A	synonymous_variant	LOW	kel-1	WBGene00002184	transcript	C47D12.7a	protein_coding
II	11695991	A	[G]	{G, A}	0.0153846	1	TRUE	FALSE	TRUE	0.0305307	65	0	1	64	G	synonymous_variant	LOW	kel-1	WBGene00002184	transcript	C47D12.7a	protein_coding
II	11696185	C	[T]	{C, T}	0.307692	1	TRUE	FALSE	TRUE	0.429338	65	0	20	45	T	synonymous_variant	LOW	xpf-1	WBGene00008140	transcript	C47D12.8.1	protein_coding
II	11696233	T	[C]	{C, T}	0.0769231	1	TRUE	FALSE	TRUE	0.143113	65	0	5	60	C	synonymous_variant	LOW	xpf-1	WBGene00008140	transcript	C47D12.8.1	protein_coding
II	11696747	G	[C]	{C, G}	0.0769231	1	TRUE	FALSE	FALSE	0.143113	65	0	5	60	C	synonymous_variant	LOW	xpf-1	WBGene00008140	transcript	C47D12.8.1	protein_coding
II	11698479	C	[T]	{C, T}	0.0153846	1	TRUE	FALSE	TRUE	0.0305307	65	0	1	64	T	synonymous_variant	LOW	inos-1	WBGene00012148	transcript	VF13D12L.1	protein_coding
II	11698515	G	[A]	{G, A}	0.0307692	1	TRUE	FALSE	TRUE	0.0601073	65	0	2	63	A	synonymous_variant	LOW	inos-1	WBGene00012148	transcript	VF13D12L.1	protein_coding
II	11698593	A	[G]	{G, A}	0.138462	1	TRUE	FALSE	TRUE	0.240429	65	0	9	56	G	synonymous_variant	LOW	inos-1	WBGene00012148	transcript	VF13D12L.1	protein_coding
II	11698611	A	[G]	{G, A}	0.0461538	1	TRUE	FALSE	TRUE	0.0887299	65	0	3	62	G	synonymous_variant	LOW	inos-1	WBGene00012148	transcript	VF13D12L.1	protein_coding
II	11698629	G	[A]	{G, A}	0.0461538	1	TRUE	FALSE	TRUE	0.0887299	65	0	3	62	A	synonymous_variant	LOW	inos-1	WBGene00012148	transcript	VF13D12L.1	protein_coding
II	11698635	G	[A]	{G, A}	0.0461538	1	TRUE	FALSE	TRUE	0.0887299	65	0	3	62	A	synonymous_variant	LOW	inos-1	WBGene00012148	transcript	VF13D12L.1	protein_coding
II	11698698	G	[A]	{G, A}	0.0461538	1	TRUE	FALSE	TRUE	0.0887299	65	0	3	62	A	synonymous_variant	LOW	inos-1	WBGene00012148	transcript	VF13D12L.1	protein_coding
II	11698707	A	[G]	{G, A}	0.0461538	1	TRUE	FALSE	TRUE	0.0887299	65	0	3	62	G	synonymous_variant	LOW	inos-1	WBGene00012148	transcript	VF13D12L.1	protein_coding
II	11698719	C	[A]	{C, A}	0.0461538	1	TRUE	FALSE	FALSE	0.0887299	65	0	3	62	A	synonymous_variant	LOW	inos-1	WBGene00012148	transcript	VF13D12L.1	protein_coding
II	11698765	G	[A]	{G, A}	0.0461538	1	TRUE	FALSE	TRUE	0.0887299	65	0	3	62	A	splice_region_variant&intron_variant	LOW	inos-1	WBGene00012148	transcript	VF13D12L.1	protein_coding
II	11698856	T	[C]	{C, T}	0.0461538	1	TRUE	FALSE	TRUE	0.0887299	65	0	3	62	C	synonymous_variant	LOW	inos-1	WBGene00012148	transcript	VF13D12L.1	protein_coding
II	11698865	G	[T]	{G, T}	0.0461538	1	TRUE	FALSE	FALSE	0.0887299	65	0	3	62	T	synonymous_variant	LOW	inos-1	WBGene00012148	transcript	VF13D12L.1	protein_coding
II	11698907	G	[A]	{G, A}	0.0461538	1	TRUE	FALSE	TRUE	0.0887299	65	0	3	62	A	synonymous_variant	LOW	inos-1	WBGene00012148	transcript	VF13D12L.1	protein_coding
II	11698985	C	[T]	{C, T}	0.0461538	1	TRUE	FALSE	TRUE	0.0887299	65	0	3	62	T	synonymous_variant	LOW	inos-1	WBGene00012148	transcript	VF13D12L.1	protein_coding
II	11699024	G	[T]	{G, T}	0.0153846	1	TRUE	FALSE	FALSE	0.0305307	65	0	1	64	T	synonymous_variant	LOW	inos-1	WBGene00012148	transcript	VF13D12L.1	protein_coding
II	11699132	A	[G]	{G, A}	0.0769231	1	TRUE	FALSE	TRUE	0.143113	65	0	5	60	G	synonymous_variant	LOW	inos-1	WBGene00012148	transcript	VF13D12L.1	protein_coding
II	11699255	C	[T]	{C, T}	0.0461538	1	TRUE	FALSE	TRUE	0.0887299	65	0	3	62	T	synonymous_variant	LOW	inos-1	WBGene00012148	transcript	VF13D12L.1	protein_coding
II	11699297	C	[T]	{C, T}	0.0461538	1	TRUE	FALSE	TRUE	0.0887299	65	0	3	62	T	synonymous_variant	LOW	inos-1	WBGene00012148	transcript	VF13D12L.1	protein_coding
II	11699429	T	[C]	{C, T}	0.0461538	1	TRUE	FALSE	TRUE	0.0887299	65	0	3	62	C	synonymous_variant	LOW	inos-1	WBGene00012148	transcript	VF13D12L.1	protein_coding
II	11699435	C	[A]	{C, A}	0.0461538	1	TRUE	FALSE	FALSE	0.0887299	65	0	3	62	A	synonymous_variant	LOW	inos-1	WBGene00012148	transcript	VF13D12L.1	protein_coding
II	11699558	A	[G]	{G, A}	0.0461538	1	TRUE	FALSE	TRUE	0.0887299	65	0	3	62	G	synonymous_variant	LOW	inos-1	WBGene00012148	transcript	VF13D12L.1	protein_coding
II	11700050	T	[G, A]	{G, T}	0.0153846	1	TRUE	FALSE	FALSE	0.0305307	65	0	1	64	A	synonymous_variant	LOW	inos-1	WBGene00012148	transcript	VF13D12L.1	protein_coding
II	11700695	A	[T]	{A, T}	0.0151515	1	TRUE	FALSE	FALSE	0.0300717	66	0	1	65	T	splice_region_variant&intron_variant	LOW	xpf-1	WBGene00008140	transcript	C47D12.8.1	protein_coding
II	11700727	AT	[A]	{AT, A}	0.0151515	1	FALSE	TRUE	FALSE	0.0300717	66	0	1	65	A	splice_region_variant&intron_variant	LOW	xpf-1	WBGene00008140	transcript	C47D12.8.1	protein_coding
II	11700823	C	[T]	{C, T}	0.0151515	1	TRUE	FALSE	TRUE	0.0300717	66	0	1	65	T	synonymous_variant	LOW	xpf-1	WBGene00008140	transcript	C47D12.8.1	protein_coding
II	11701822	G	[A]	{G, A}	0.178571	1	TRUE	FALSE	TRUE	0.29601	56	0	10	46	A	synonymous_variant	LOW	xpf-1	WBGene00008140	transcript	C47D12.8.1	protein_coding
II	11702673	G	[A]	{G, A}	0.151515	1	TRUE	FALSE	TRUE	0.259079	66	0	10	56	A	splice_region_variant&intron_variant	LOW	xpf-1	WBGene00008140	transcript	C47D12.8.1	protein_coding
II	11703666	G	[A]	{G, A}	0.0151515	1	TRUE	FALSE	TRUE	0.0300717	66	0	1	65	A	synonymous_variant	LOW	xpf-1	WBGene00008140	transcript	C47D12.8.1	protein_coding
II	11703717	C	[T]	{C, T}	0.348485	1	TRUE	FALSE	TRUE	0.457553	66	0	23	43	T	synonymous_variant	LOW	xpf-1	WBGene00008140	transcript	C47D12.8.1	protein_coding
II	11704083	A	[T]	{A, T}	0.0151515	1	TRUE	FALSE	FALSE	0.0300717	66	0	1	65	T	splice_region_variant&synonymous_variant	LOW	xpf-1	WBGene00008140	transcript	C47D12.8.1	protein_coding
II	11704296	G	[A]	{G, A}	0.0151515	1	TRUE	FALSE	TRUE	0.0300717	66	0	1	65	A	splice_region_variant&synonymous_variant	LOW	xpf-1	WBGene00008140	transcript	C47D12.8.1	protein_coding
II	11705152	TTC	[T]	{TTC, T}	0.0151515	1	FALSE	TRUE	FALSE	0.0300717	66	0	1	65	T	splice_region_variant&intron_variant	LOW	xpf-1	WBGene00008140	transcript	C47D12.8.1	protein_coding
II	11705253	G	[C]	{C, G}	0.166667	1	TRUE	FALSE	FALSE	0.279898	66	0	11	55	C	synonymous_variant	LOW	xpf-1	WBGene00008140	transcript	C47D12.8.1	protein_coding
II	11706125	T	[A]	{A, T}	0.0151515	1	TRUE	FALSE	FALSE	0.0300717	66	0	1	65	A	synonymous_variant	LOW	VF13D12L.3	WBGene00012149	transcript	VF13D12L.3.1	protein_coding
II	11706137	G	[A]	{G, A}	0.0757576	1	TRUE	FALSE	TRUE	0.141106	66	0	5	61	A	synonymous_variant	LOW	VF13D12L.3	WBGene00012149	transcript	VF13D12L.3.1	protein_coding
II	11706696	G	[A]	{G, A}	0.0454545	1	TRUE	FALSE	TRUE	0.0874393	66	0	3	63	A	synonymous_variant	LOW	VF13D12L.3	WBGene00012149	transcript	VF13D12L.3.1	protein_coding
II	11707370	C	[A]	{C, A}	0.136364	1	TRUE	FALSE	FALSE	0.237335	66	0	9	57	A	synonymous_variant	LOW	VF13D12L.3	WBGene00012149	transcript	VF13D12L.3.1	protein_coding
II	11707466	A	[C]	{C, A}	0.0757576	1	TRUE	FALSE	FALSE	0.141106	66	0	5	61	C	splice_region_variant&intron_variant	LOW	VF13D12L.3	WBGene00012149	transcript	VF13D12L.3.1	protein_coding
II	11707668	T	[C]	{C, T}	0.0909091	1	TRUE	FALSE	TRUE	0.166551	66	0	6	60	C	synonymous_variant	LOW	F13D12.9	WBGene00008743	transcript	F13D12.9.1	protein_coding
II	11708461	G	[A]	{G, A}	0.166667	1	TRUE	FALSE	TRUE	0.279898	66	0	11	55	A	synonymous_variant	LOW	F13D12.9	WBGene00008743	transcript	F13D12.9.1	protein_coding
II	11708673	A	[G]	{G, A}	0.0151515	1	TRUE	FALSE	TRUE	0.0300717	66	0	1	65	G	splice_region_variant&intron_variant	LOW	F13D12.9	WBGene00008743	transcript	F13D12.9.1	protein_coding
II	11709284	A	[G]	{G, A}	0.575758	1	TRUE	FALSE	TRUE	0.492251	66	0	38	28	G	synonymous_variant	LOW	F13D12.9	WBGene00008743	transcript	F13D12.9.1	protein_coding
II	11709532	T	[C]	{C, T}	0.166667	1	TRUE	FALSE	TRUE	0.279898	66	0	11	55	C	splice_region_variant&intron_variant	LOW	F13D12.9	WBGene00008743	transcript	F13D12.9.2	protein_coding
II	11712614	A	[G]	{G, A}	0.0151515	1	TRUE	FALSE	TRUE	0.0300717	66	0	1	65	G	synonymous_variant	LOW	VF13D12L.3	WBGene00012149	transcript	VF13D12L.3.1	protein_coding
II	11713456	C	[T]	{C, T}	0.0151515	1	TRUE	FALSE	TRUE	0.0300717	66	0	1	65	T	synonymous_variant	LOW	VF13D12L.3	WBGene00012149	transcript	VF13D12L.3.1	protein_coding
II	11715522	T	[A]	{A, T}	0.106061	1	TRUE	FALSE	FALSE	0.191071	66	0	7	59	A	synonymous_variant	LOW	F13D12.10	WBGene00008744	transcript	F13D12.10a	protein_coding
II	11715785	T	[A]	{A, T}	0.0151515	1	TRUE	FALSE	FALSE	0.0300717	66	0	1	65	A	splice_region_variant&intron_variant	LOW	F13D12.10	WBGene00008744	transcript	F13D12.10a	protein_coding
II	11720639	A	[C]	{C, A}	0.272727	1	TRUE	FALSE	FALSE	0.399722	66	0	18	48	C	synonymous_variant	LOW	F13D12.3	WBGene00008739	transcript	F13D12.3	protein_coding
II	11721464	C	[T]	{C, T}	0.0454545	1	TRUE	FALSE	TRUE	0.0874393	66	0	3	63	T	synonymous_variant	LOW	F13D12.3	WBGene00008739	transcript	F13D12.3	protein_coding
II	11725577	T	[C]	{C, T}	0.166667	1	TRUE	FALSE	TRUE	0.279898	66	0	11	55	C	splice_region_variant&intron_variant	LOW	ldh-1	WBGene00002262	transcript	F13D12.2b	protein_coding
II	11726115	C	[T]	{C, T}	0.0151515	1	TRUE	FALSE	TRUE	0.0300717	66	0	1	65	T	synonymous_variant	LOW	ldh-1	WBGene00002262	transcript	F13D12.2b	protein_coding
II	11726132	C	[T]	{C, T}	0.0757576	1	TRUE	FALSE	TRUE	0.141106	66	0	5	61	T	synonymous_variant	LOW	ldh-1	WBGene00002262	transcript	F13D12.2b	protein_coding
II	11726924	C	[T]	{C, T}	0.0151515	1	TRUE	FALSE	TRUE	0.0300717	66	0	1	65	T	synonymous_variant	LOW	F13D12.5	WBGene00008740	transcript	F13D12.5	protein_coding
II	11727099	C	[T]	{C, T}	0.0151515	1	TRUE	FALSE	TRUE	0.0300717	66	0	1	65	T	synonymous_variant	LOW	F13D12.5	WBGene00008740	transcript	F13D12.5	protein_coding
II	11727117	T	[C]	{C, T}	0.0151515	1	TRUE	FALSE	TRUE	0.0300717	66	0	1	65	C	synonymous_variant	LOW	F13D12.5	WBGene00008740	transcript	F13D12.5	protein_coding
II	11727230	A	[AT]	{AT, A}	0.0757576	1	FALSE	TRUE	FALSE	0.141106	66	0	5	61	AT	splice_region_variant&intron_variant	LOW	F13D12.5	WBGene00008740	transcript	F13D12.5	protein_coding
II	11728009	C	[T]	{C, T}	0.166667	1	TRUE	FALSE	TRUE	0.279898	66	0	11	55	T	synonymous_variant	LOW	F13D12.5	WBGene00008740	transcript	F13D12.5	protein_coding
II	11728254	G	[A]	{G, A}	0.0151515	1	TRUE	FALSE	TRUE	0.0300717	66	0	1	65	A	synonymous_variant	LOW	F13D12.5	WBGene00008740	transcript	F13D12.5	protein_coding
II	11728314	C	[T]	{C, T}	0.0151515	1	TRUE	FALSE	TRUE	0.0300717	66	0	1	65	T	synonymous_variant	LOW	F13D12.5	WBGene00008740	transcript	F13D12.5	protein_coding
II	11729283	C	[T]	{C, T}	0.181818	1	TRUE	FALSE	TRUE	0.299792	66	0	12	54	T	synonymous_variant	LOW	alh-8	WBGene00000114	transcript	F13D12.4a.1	protein_coding
II	11729424	C	[T]	{C, T}	0.166667	1	TRUE	FALSE	TRUE	0.279898	66	0	11	55	T	synonymous_variant	LOW	alh-8	WBGene00000114	transcript	F13D12.4a.1	protein_coding
II	11729868	T	[C]	{C, T}	0.0454545	1	TRUE	FALSE	TRUE	0.0874393	66	0	3	63	C	synonymous_variant	LOW	alh-8	WBGene00000114	transcript	F13D12.4a.1	protein_coding
II	11730271	A	[G]	{G, A}	0.242424	1	TRUE	FALSE	TRUE	0.370113	66	0	16	50	G	synonymous_variant	LOW	alh-8	WBGene00000114	transcript	F13D12.4a.1	protein_coding
II	11730577	A	[G]	{G, A}	0.0151515	1	TRUE	FALSE	TRUE	0.0300717	66	0	1	65	G	synonymous_variant	LOW	alh-8	WBGene00000114	transcript	F13D12.4a.1	protein_coding
II	11731822	G	[A]	{G, A}	0.0151515	1	TRUE	FALSE	TRUE	0.0300717	66	0	1	65	A	splice_region_variant&synonymous_variant	LOW	F13D12.8	WBGene00008742	transcript	F13D12.8	protein_coding
II	11741473	A	[T]	{A, T}	0.0151515	1	TRUE	FALSE	FALSE	0.0300717	66	0	1	65	T	splice_region_variant&intron_variant	LOW	F13D12.6	WBGene00008741	transcript	F13D12.6.1	protein_coding
II	11741779	G	[A]	{G, A}	0.0151515	1	TRUE	FALSE	TRUE	0.0300717	66	0	1	65	A	synonymous_variant	LOW	F13D12.6	WBGene00008741	transcript	F13D12.6.1	protein_coding
II	11741860	T	[C]	{C, T}	0.0151515	1	TRUE	FALSE	TRUE	0.0300717	66	0	1	65	C	synonymous_variant	LOW	F13D12.6	WBGene00008741	transcript	F13D12.6.1	protein_coding
II	11742624	A	[C]	{C, A}	0.893939	1	TRUE	FALSE	FALSE	0.191071	66	0	59	7	C	synonymous_variant	LOW	F13D12.6	WBGene00008741	transcript	F13D12.6.1	protein_coding
II	11742651	C	[T]	{C, T}	0.0153846	1	TRUE	FALSE	TRUE	0.0305307	65	0	1	64	T	synonymous_variant	LOW	F13D12.6	WBGene00008741	transcript	F13D12.6.1	protein_coding
II	11744423	A	[G]	{G, A}	0.0923077	1	TRUE	FALSE	TRUE	0.168873	65	0	6	59	G	splice_region_variant&intron_variant	LOW	gpb-1	WBGene00001679	transcript	F13D12.7a.1	protein_coding
II	11744686	GA	[G]	{G, GA}	0.0153846	1	FALSE	TRUE	FALSE	0.0305307	65	0	1	64	G	splice_region_variant&intron_variant	LOW	gpb-1	WBGene00001679	transcript	F13D12.7a.1	protein_coding
II	11745802	GAA	[G, GAAA, GA]	{GAAA, GAA, GA}	0.181818	1	FALSE	TRUE	FALSE	0.299792	66	0	12	54	G	splice_region_variant&intron_variant	LOW	gpb-1	WBGene00001679	transcript	F13D12.7a.1	protein_coding
II	11745889	A	[G]	{G, A}	0.0151515	1	TRUE	FALSE	TRUE	0.0300717	66	0	1	65	G	synonymous_variant	LOW	gpb-1	WBGene00001679	transcript	F13D12.7a.1	protein_coding
II	11746081	A	[G]	{G, A}	0.0606061	1	TRUE	FALSE	TRUE	0.114735	66	0	4	62	G	synonymous_variant	LOW	gpb-1	WBGene00001679	transcript	F13D12.7a.1	protein_coding
II	11747815	C	[CA]	{C, CA}	0.0454545	1	FALSE	TRUE	FALSE	0.0874393	66	0	3	63	CA	splice_region_variant	LOW	gpb-1	WBGene00001679	transcript	F13D12.7a.1	protein_coding
II	11762262	A	[G]	{G, A}	0.348485	1	TRUE	FALSE	TRUE	0.457553	66	0	23	43	G	synonymous_variant	LOW	F44E5.3	WBGene00009690	transcript	F44E5.3	protein_coding
II	11762487	A	[C]	{C, A}	0.030303	1	TRUE	FALSE	FALSE	0.0592181	66	0	2	64	C	synonymous_variant	LOW	F44E5.3	WBGene00009690	transcript	F44E5.3	protein_coding
II	11765233	T	[C]	{C, T}	0.0151515	1	TRUE	FALSE	TRUE	0.0300717	66	0	1	65	C	synonymous_variant	LOW	F44E5.3	WBGene00009690	transcript	F44E5.3	protein_coding
II	11767342	C	[T]	{C, T}	0.0169492	1	TRUE	FALSE	TRUE	0.0336086	59	0	1	58	T	synonymous_variant	LOW	F44E5.2	WBGene00009689	transcript	F44E5.2	protein_coding
II	11767369	A	[G, T]	{G, A}	0.186441	1	TRUE	FALSE	FALSE	0.305954	59	0	11	48	G	synonymous_variant	LOW	F44E5.2	WBGene00009689	transcript	F44E5.2	protein_coding
II	11767540	C	[T]	{C, T}	0.0169492	1	TRUE	FALSE	TRUE	0.0336086	59	0	1	58	T	synonymous_variant	LOW	F44E5.2	WBGene00009689	transcript	F44E5.2	protein_coding
II	11767901	A	[T]	{A, T}	0.0833333	1	TRUE	FALSE	FALSE	0.154062	60	0	5	55	T	splice_region_variant&intron_variant	LOW	F44E5.2	WBGene00009689	transcript	F44E5.2	protein_coding
II	11768610	T	[C]	{C, T}	0.0166667	1	TRUE	FALSE	TRUE	0.0330532	60	0	1	59	C	synonymous_variant	LOW	F44E5.2	WBGene00009689	transcript	F44E5.2	protein_coding
II	11772031	T	[A]	{A, T}	0.0151515	1	TRUE	FALSE	FALSE	0.0300717	66	0	1	65	A	splice_region_variant&intron_variant	LOW	F44E5.15	WBGene00206377	transcript	F44E5.15	protein_coding
II	11773414	C	[T]	{C, T}	0.0151515	1	TRUE	FALSE	TRUE	0.0300717	66	0	1	65	T	synonymous_variant	LOW	F44E5.15	WBGene00206377	transcript	F44E5.15	protein_coding
II	11774356	A	[C]	{C, A}	0.0151515	1	TRUE	FALSE	FALSE	0.0300717	66	0	1	65	C	splice_region_variant&intron_variant	LOW	F44E5.1	WBGene00009688	transcript	F44E5.1.1	protein_coding
II	11775286	C	[T]	{C, T}	0.030303	1	TRUE	FALSE	TRUE	0.0592181	66	0	2	64	T	splice_region_variant&intron_variant	LOW	patr-1	WBGene00009661	transcript	F43G6.9	protein_coding
II	11775471	G	[A]	{G, A}	0.0606061	1	TRUE	FALSE	TRUE	0.114735	66	0	4	62	A	synonymous_variant	LOW	patr-1	WBGene00009661	transcript	F43G6.9	protein_coding
II	11775549	C	[A]	{C, A}	0.166667	1	TRUE	FALSE	FALSE	0.279898	66	0	11	55	A	synonymous_variant	LOW	patr-1	WBGene00009661	transcript	F43G6.9	protein_coding
II	11775726	A	[G]	{G, A}	0.0151515	1	TRUE	FALSE	TRUE	0.0300717	66	0	1	65	G	synonymous_variant	LOW	patr-1	WBGene00009661	transcript	F43G6.9	protein_coding
II	11776215	T	[A]	{A, T}	0.261538	1	TRUE	FALSE	FALSE	0.389267	65	0	17	48	A	splice_region_variant&intron_variant	LOW	patr-1	WBGene00009661	transcript	F43G6.9	protein_coding
II	11776340	C	[T]	{C, T}	0.0151515	1	TRUE	FALSE	TRUE	0.0300717	66	0	1	65	T	synonymous_variant	LOW	patr-1	WBGene00009661	transcript	F43G6.9	protein_coding
II	11776674	A	[G]	{G, A}	0.0606061	1	TRUE	FALSE	TRUE	0.114735	66	0	4	62	G	synonymous_variant	LOW	patr-1	WBGene00009661	transcript	F43G6.9	protein_coding
II	11776691	A	[G]	{G, A}	0.0151515	1	TRUE	FALSE	TRUE	0.0300717	66	0	1	65	G	synonymous_variant	LOW	patr-1	WBGene00009661	transcript	F43G6.9	protein_coding
II	11776956	G	[A]	{G, A}	0.0151515	1	TRUE	FALSE	TRUE	0.0300717	66	0	1	65	A	synonymous_variant	LOW	patr-1	WBGene00009661	transcript	F43G6.9	protein_coding
II	11777306	A	[T]	{A, T}	0.0606061	1	TRUE	FALSE	FALSE	0.114735	66	0	4	62	T	synonymous_variant	LOW	patr-1	WBGene00009661	transcript	F43G6.9	protein_coding
II	11777535	C	[T]	{C, T}	0.0151515	1	TRUE	FALSE	TRUE	0.0300717	66	0	1	65	T	synonymous_variant	LOW	patr-1	WBGene00009661	transcript	F43G6.9	protein_coding
II	11778956	T	[C]	{C, T}	0.0151515	1	TRUE	FALSE	TRUE	0.0300717	66	0	1	65	C	synonymous_variant	LOW	dna-2	WBGene00001016	transcript	F43G6.1	protein_coding
II	11778962	A	[T]	{A, T}	0.0151515	1	TRUE	FALSE	FALSE	0.0300717	66	0	1	65	T	synonymous_variant	LOW	dna-2	WBGene00001016	transcript	F43G6.1	protein_coding
II	11778989	G	[A]	{G, A}	0.166667	1	TRUE	FALSE	TRUE	0.279898	66	0	11	55	A	synonymous_variant	LOW	dna-2	WBGene00001016	transcript	F43G6.1	protein_coding
II	11779019	T	[C]	{C, T}	0.0151515	1	TRUE	FALSE	TRUE	0.0300717	66	0	1	65	C	splice_region_variant&intron_variant	LOW	dna-2	WBGene00001016	transcript	F43G6.1	protein_coding
II	11779239	G	[T]	{G, T}	0.0757576	1	TRUE	FALSE	FALSE	0.141106	66	0	5	61	T	synonymous_variant	LOW	dna-2	WBGene00001016	transcript	F43G6.1	protein_coding
II	11779666	G	[A]	{G, A}	0.0151515	1	TRUE	FALSE	TRUE	0.0300717	66	0	1	65	A	synonymous_variant	LOW	dna-2	WBGene00001016	transcript	F43G6.1	protein_coding
II	11779690	A	[C]	{C, A}	0.0151515	1	TRUE	FALSE	FALSE	0.0300717	66	0	1	65	C	synonymous_variant	LOW	dna-2	WBGene00001016	transcript	F43G6.1	protein_coding
II	11780822	T	[C]	{C, T}	0.0757576	1	TRUE	FALSE	TRUE	0.141106	66	0	5	61	C	synonymous_variant	LOW	dna-2	WBGene00001016	transcript	F43G6.1	protein_coding
II	11781157	AT	[A]	{AT, A}	0.0151515	1	FALSE	TRUE	FALSE	0.0300717	66	0	1	65	A	splice_region_variant&intron_variant	LOW	dna-2	WBGene00001016	transcript	F43G6.1	protein_coding
II	11783698	T	[G]	{G, T}	0.030303	1	TRUE	FALSE	FALSE	0.0592181	66	0	2	64	G	splice_region_variant&intron_variant	LOW	F43G6.3	WBGene00009656	transcript	F43G6.3	pseudogene
II	11790945	A	[T]	{A, T}	0.166667	1	TRUE	FALSE	FALSE	0.279898	66	0	11	55	T	synonymous_variant	LOW	F43G6.4	WBGene00009657	transcript	F43G6.4	protein_coding
II	11795779	G	[A]	{G, A}	0.454545	1	TRUE	FALSE	TRUE	0.499653	66	0	30	36	A	synonymous_variant	LOW	F43G6.4	WBGene00009657	transcript	F43G6.4	protein_coding
II	11799073	A	[C]	{C, A}	0.212121	1	TRUE	FALSE	FALSE	0.336803	66	0	14	52	C	synonymous_variant	LOW	hda-5	WBGene00009663	transcript	F43G6.11	protein_coding
II	11799102	C	[T]	{C, T}	0.212121	1	TRUE	FALSE	TRUE	0.336803	66	0	14	52	T	synonymous_variant	LOW	hda-5	WBGene00009663	transcript	F43G6.11	protein_coding
II	11799147	G	[A]	{G, A}	0.0151515	1	TRUE	FALSE	TRUE	0.0300717	66	0	1	65	A	synonymous_variant	LOW	hda-5	WBGene00009663	transcript	F43G6.11	protein_coding
II	11799519	A	[G]	{G, A}	0.212121	1	TRUE	FALSE	TRUE	0.336803	66	0	14	52	G	synonymous_variant	LOW	hda-5	WBGene00009663	transcript	F43G6.11	protein_coding
II	11799612	C	[T]	{C, T}	0.212121	1	TRUE	FALSE	TRUE	0.336803	66	0	14	52	T	synonymous_variant	LOW	hda-5	WBGene00009663	transcript	F43G6.11	protein_coding
II	11799654	C	[T]	{C, T}	0.0151515	1	TRUE	FALSE	TRUE	0.0300717	66	0	1	65	T	synonymous_variant	LOW	hda-5	WBGene00009663	transcript	F43G6.11	protein_coding
II	11799669	C	[T]	{C, T}	0.212121	1	TRUE	FALSE	TRUE	0.336803	66	0	14	52	T	synonymous_variant	LOW	hda-5	WBGene00009663	transcript	F43G6.11	protein_coding
II	11799714	C	[T]	{C, T}	0.0757576	1	TRUE	FALSE	TRUE	0.141106	66	0	5	61	T	synonymous_variant	LOW	hda-5	WBGene00009663	transcript	F43G6.11	protein_coding
II	11799903	C	[T]	{C, T}	0.212121	1	TRUE	FALSE	TRUE	0.336803	66	0	14	52	T	synonymous_variant	LOW	hda-5	WBGene00009663	transcript	F43G6.11	protein_coding
II	11801693	T	[C]	{C, T}	0.212121	1	TRUE	FALSE	TRUE	0.336803	66	0	14	52	C	synonymous_variant	LOW	hda-5	WBGene00009663	transcript	F43G6.11	protein_coding
II	11801711	C	[A]	{C, A}	0.212121	1	TRUE	FALSE	FALSE	0.336803	66	0	14	52	A	synonymous_variant	LOW	hda-5	WBGene00009663	transcript	F43G6.11	protein_coding
II	11801717	A	[C]	{C, A}	0.212121	1	TRUE	FALSE	FALSE	0.336803	66	0	14	52	C	synonymous_variant	LOW	hda-5	WBGene00009663	transcript	F43G6.11	protein_coding
II	11801720	A	[G]	{G, A}	0.212121	1	TRUE	FALSE	TRUE	0.336803	66	0	14	52	G	synonymous_variant	LOW	hda-5	WBGene00009663	transcript	F43G6.11	protein_coding
II	11801789	T	[A]	{A, T}	0.212121	1	TRUE	FALSE	FALSE	0.336803	66	0	14	52	A	synonymous_variant	LOW	hda-5	WBGene00009663	transcript	F43G6.11	protein_coding
II	11801792	T	[C]	{C, T}	0.212121	1	TRUE	FALSE	TRUE	0.336803	66	0	14	52	C	synonymous_variant	LOW	hda-5	WBGene00009663	transcript	F43G6.11	protein_coding
II	11801798	G	[A]	{G, A}	0.212121	1	TRUE	FALSE	TRUE	0.336803	66	0	14	52	A	synonymous_variant	LOW	hda-5	WBGene00009663	transcript	F43G6.11	protein_coding
II	11801807	C	[T]	{C, T}	0.212121	1	TRUE	FALSE	TRUE	0.336803	66	0	14	52	T	synonymous_variant	LOW	hda-5	WBGene00009663	transcript	F43G6.11	protein_coding
II	11802260	G	[A]	{G, A}	0.0151515	1	TRUE	FALSE	TRUE	0.0300717	66	0	1	65	A	synonymous_variant	LOW	hda-5	WBGene00009663	transcript	F43G6.11	protein_coding
II	11802356	A	[G]	{G, A}	0.0151515	1	TRUE	FALSE	TRUE	0.0300717	66	0	1	65	G	stop_retained_variant	LOW	hda-5	WBGene00009663	transcript	F43G6.11	protein_coding
II	11802916	A	[T]	{A, T}	0.32	1	TRUE	FALSE	FALSE	0.439596	50	0	16	34	T	synonymous_variant	LOW	F43G6.17	WBGene00219378	transcript	F43G6.17a	protein_coding
II	11803346	T	[C]	{C, T}	0.40625	1	TRUE	FALSE	TRUE	0.48622	64	0	26	38	C	synonymous_variant	LOW	F43G6.17	WBGene00219378	transcript	F43G6.17a	protein_coding
II	11806987	C	[A]	{C, A}	0.212121	1	TRUE	FALSE	FALSE	0.336803	66	0	14	52	A	splice_region_variant&intron_variant	LOW	jmjd-1.1	WBGene00005013	transcript	F43G6.6	protein_coding
II	11807312	C	[A]	{C, A}	0.0151515	1	TRUE	FALSE	FALSE	0.0300717	66	0	1	65	A	synonymous_variant	LOW	jmjd-1.1	WBGene00005013	transcript	F43G6.6	protein_coding
II	11807420	T	[A]	{A, T}	0.0757576	1	TRUE	FALSE	FALSE	0.141106	66	0	5	61	A	synonymous_variant	LOW	jmjd-1.1	WBGene00005013	transcript	F43G6.6	protein_coding
II	11807448	C	[T]	{C, T}	0.212121	1	TRUE	FALSE	TRUE	0.336803	66	0	14	52	T	synonymous_variant	LOW	jmjd-1.1	WBGene00005013	transcript	F43G6.6	protein_coding
II	11807558	G	[C]	{C, G}	0.212121	1	TRUE	FALSE	FALSE	0.336803	66	0	14	52	C	synonymous_variant	LOW	jmjd-1.1	WBGene00005013	transcript	F43G6.6	protein_coding
II	11807657	G	[A]	{G, A}	0.166667	1	TRUE	FALSE	TRUE	0.279898	66	0	11	55	A	synonymous_variant	LOW	jmjd-1.1	WBGene00005013	transcript	F43G6.6	protein_coding
II	11807786	T	[A]	{A, T}	0.212121	1	TRUE	FALSE	FALSE	0.336803	66	0	14	52	A	synonymous_variant	LOW	jmjd-1.1	WBGene00005013	transcript	F43G6.6	protein_coding
II	11807807	C	[T]	{C, T}	0.212121	1	TRUE	FALSE	TRUE	0.336803	66	0	14	52	T	synonymous_variant	LOW	jmjd-1.1	WBGene00005013	transcript	F43G6.6	protein_coding
II	11807810	T	[C]	{C, T}	0.212121	1	TRUE	FALSE	TRUE	0.336803	66	0	14	52	C	synonymous_variant	LOW	jmjd-1.1	WBGene00005013	transcript	F43G6.6	protein_coding
II	11807813	T	[C]	{C, T}	0.212121	1	TRUE	FALSE	TRUE	0.336803	66	0	14	52	C	synonymous_variant	LOW	jmjd-1.1	WBGene00005013	transcript	F43G6.6	protein_coding
II	11807932	C	[T]	{C, T}	0.212121	1	TRUE	FALSE	TRUE	0.336803	66	0	14	52	T	synonymous_variant	LOW	jmjd-1.1	WBGene00005013	transcript	F43G6.6	protein_coding
II	11807959	A	[G]	{G, A}	0.212121	1	TRUE	FALSE	TRUE	0.336803	66	0	14	52	G	synonymous_variant	LOW	jmjd-1.1	WBGene00005013	transcript	F43G6.6	protein_coding
II	11807968	G	[A]	{G, A}	0.212121	1	TRUE	FALSE	TRUE	0.336803	66	0	14	52	A	synonymous_variant	LOW	jmjd-1.1	WBGene00005013	transcript	F43G6.6	protein_coding
II	11807983	C	[T]	{C, T}	0.212121	1	TRUE	FALSE	TRUE	0.336803	66	0	14	52	T	synonymous_variant	LOW	jmjd-1.1	WBGene00005013	transcript	F43G6.6	protein_coding
II	11808007	C	[T]	{C, T}	0.19697	1	TRUE	FALSE	TRUE	0.31876	66	0	13	53	T	synonymous_variant	LOW	jmjd-1.1	WBGene00005013	transcript	F43G6.6	protein_coding
II	11808061	T	[G]	{G, T}	0.212121	1	TRUE	FALSE	FALSE	0.336803	66	0	14	52	G	synonymous_variant	LOW	jmjd-1.1	WBGene00005013	transcript	F43G6.6	protein_coding
II	11808088	A	[T]	{A, T}	0.212121	1	TRUE	FALSE	FALSE	0.336803	66	0	14	52	T	synonymous_variant	LOW	jmjd-1.1	WBGene00005013	transcript	F43G6.6	protein_coding
II	11808106	C	[T]	{C, T}	0.212121	1	TRUE	FALSE	TRUE	0.336803	66	0	14	52	T	synonymous_variant	LOW	jmjd-1.1	WBGene00005013	transcript	F43G6.6	protein_coding
II	11808157	C	[T]	{C, T}	0.212121	1	TRUE	FALSE	TRUE	0.336803	66	0	14	52	T	synonymous_variant	LOW	jmjd-1.1	WBGene00005013	transcript	F43G6.6	protein_coding
II	11808217	T	[C]	{C, T}	0.166667	1	TRUE	FALSE	TRUE	0.279898	66	0	11	55	C	synonymous_variant	LOW	jmjd-1.1	WBGene00005013	transcript	F43G6.6	protein_coding
II	11808226	A	[T]	{A, T}	0.212121	1	TRUE	FALSE	FALSE	0.336803	66	0	14	52	T	synonymous_variant	LOW	jmjd-1.1	WBGene00005013	transcript	F43G6.6	protein_coding
II	11808645	T	[C]	{C, T}	0.212121	1	TRUE	FALSE	TRUE	0.336803	66	0	14	52	C	synonymous_variant	LOW	jmjd-1.1	WBGene00005013	transcript	F43G6.6	protein_coding
II	11808708	A	[G]	{G, A}	0.0151515	1	TRUE	FALSE	TRUE	0.0300717	66	0	1	65	G	splice_region_variant&synonymous_variant	LOW	jmjd-1.1	WBGene00005013	transcript	F43G6.6	protein_coding
II	11810852	A	[G]	{G, A}	0.015625	1	TRUE	FALSE	TRUE	0.0310039	64	0	1	63	G	synonymous_variant	LOW	F43G6.7	WBGene00009659	transcript	F43G6.7	protein_coding
II	11810885	G	[A]	{G, A}	0.21875	1	TRUE	FALSE	TRUE	0.344488	64	0	14	50	A	synonymous_variant	LOW	F43G6.7	WBGene00009659	transcript	F43G6.7	protein_coding
II	11810897	A	[G]	{G, A}	0.03125	1	TRUE	FALSE	TRUE	0.0610236	64	0	2	62	G	synonymous_variant	LOW	F43G6.7	WBGene00009659	transcript	F43G6.7	protein_coding
II	11811404	G	[T]	{G, T}	0.0634921	1	TRUE	FALSE	FALSE	0.119873	63	0	4	59	T	synonymous_variant	LOW	F43G6.7	WBGene00009659	transcript	F43G6.7	protein_coding
II	11811413	C	[T]	{C, T}	0.0634921	1	TRUE	FALSE	TRUE	0.119873	63	0	4	59	T	synonymous_variant	LOW	F43G6.7	WBGene00009659	transcript	F43G6.7	protein_coding
II	11811425	T	[C]	{C, T}	0.03125	1	TRUE	FALSE	TRUE	0.0610236	64	0	2	62	C	synonymous_variant	LOW	F43G6.7	WBGene00009659	transcript	F43G6.7	protein_coding
II	11811485	A	[C]	{C, A}	0.21875	1	TRUE	FALSE	FALSE	0.344488	64	0	14	50	C	synonymous_variant	LOW	F43G6.7	WBGene00009659	transcript	F43G6.7	protein_coding
II	11811509	C	[T]	{C, T}	0.21875	1	TRUE	FALSE	TRUE	0.344488	64	0	14	50	T	synonymous_variant	LOW	F43G6.7	WBGene00009659	transcript	F43G6.7	protein_coding
II	11812575	T	[C]	{C, T}	0.212121	1	TRUE	FALSE	TRUE	0.336803	66	0	14	52	C	synonymous_variant	LOW	F43G6.8	WBGene00009660	transcript	F43G6.8	protein_coding
II	11812700	G	[T]	{G, T}	0.212121	1	TRUE	FALSE	FALSE	0.336803	66	0	14	52	T	synonymous_variant	LOW	F43G6.8	WBGene00009660	transcript	F43G6.8	protein_coding
II	11812701	A	[G]	{G, A}	0.212121	1	TRUE	FALSE	TRUE	0.336803	66	0	14	52	G	synonymous_variant	LOW	F43G6.8	WBGene00009660	transcript	F43G6.8	protein_coding
II	11812707	C	[T]	{C, T}	0.212121	1	TRUE	FALSE	TRUE	0.336803	66	0	14	52	T	synonymous_variant	LOW	F43G6.8	WBGene00009660	transcript	F43G6.8	protein_coding
II	11812734	A	[C]	{C, A}	0.212121	1	TRUE	FALSE	FALSE	0.336803	66	0	14	52	C	synonymous_variant	LOW	F43G6.8	WBGene00009660	transcript	F43G6.8	protein_coding
II	11812847	G	[A]	{G, A}	0.212121	1	TRUE	FALSE	TRUE	0.336803	66	0	14	52	A	splice_region_variant&intron_variant	LOW	F43G6.8	WBGene00009660	transcript	F43G6.8	protein_coding
II	11815127	A	[G]	{G, A}	0.0151515	1	TRUE	FALSE	TRUE	0.0300717	66	0	1	65	G	synonymous_variant	LOW	F43G6.5	WBGene00009658	transcript	F43G6.5	protein_coding
II	11815154	A	[G]	{G, A}	0.0151515	1	TRUE	FALSE	TRUE	0.0300717	66	0	1	65	G	synonymous_variant	LOW	F43G6.5	WBGene00009658	transcript	F43G6.5	protein_coding
II	11815694	A	[G]	{G, A}	0.151515	1	TRUE	FALSE	TRUE	0.259079	66	0	10	56	G	synonymous_variant	LOW	F43G6.5	WBGene00009658	transcript	F43G6.5	protein_coding
II	11815700	C	[A]	{C, A}	0.030303	1	TRUE	FALSE	FALSE	0.0592181	66	0	2	64	A	synonymous_variant	LOW	F43G6.5	WBGene00009658	transcript	F43G6.5	protein_coding
II	11815981	G	[A]	{G, A}	0.215385	1	TRUE	FALSE	TRUE	0.340608	65	0	14	51	A	synonymous_variant	LOW	F43G6.5	WBGene00009658	transcript	F43G6.5	protein_coding
II	11816006	A	[G]	{G, A}	0.0153846	1	TRUE	FALSE	TRUE	0.0305307	65	0	1	64	G	synonymous_variant	LOW	F43G6.5	WBGene00009658	transcript	F43G6.5	protein_coding
II	11816231	G	[T]	{G, T}	0.0615385	1	TRUE	FALSE	FALSE	0.116398	65	0	4	61	T	synonymous_variant	LOW	F43G6.5	WBGene00009658	transcript	F43G6.5	protein_coding
II	11816324	T	[C]	{C, T}	0.169231	1	TRUE	FALSE	TRUE	0.283363	65	0	11	54	C	synonymous_variant	LOW	F43G6.5	WBGene00009658	transcript	F43G6.5	protein_coding
II	11818463	T	[G]	{G, T}	0.318182	1	TRUE	FALSE	FALSE	0.437196	66	0	21	45	G	synonymous_variant	LOW	Y6D1A.2	WBGene00012396	transcript	Y6D1A.2	protein_coding
II	11818475	G	[A]	{G, A}	0.0151515	1	TRUE	FALSE	TRUE	0.0300717	66	0	1	65	A	splice_region_variant&synonymous_variant	LOW	Y6D1A.2	WBGene00012396	transcript	Y6D1A.2	protein_coding
II	11818484	A	[G]	{G, A}	0.0454545	1	TRUE	FALSE	TRUE	0.0874393	66	0	3	63	G	splice_region_variant&intron_variant	LOW	Y6D1A.2	WBGene00012396	transcript	Y6D1A.2	protein_coding
II	11818895	C	[T]	{C, T}	0.0606061	1	TRUE	FALSE	TRUE	0.114735	66	0	4	62	T	synonymous_variant	LOW	Y6D1A.2	WBGene00012396	transcript	Y6D1A.2	protein_coding
II	11818973	C	[G]	{C, G}	0.0151515	1	TRUE	FALSE	FALSE	0.0300717	66	0	1	65	G	synonymous_variant	LOW	Y6D1A.2	WBGene00012396	transcript	Y6D1A.2	protein_coding
II	11821533	A	[G]	{G, A}	0.575758	1	TRUE	FALSE	TRUE	0.492251	66	0	38	28	G	synonymous_variant	LOW	Y6D1A.1	WBGene00012395	transcript	Y6D1A.1	protein_coding
II	11821548	A	[G]	{G, A}	0.575758	1	TRUE	FALSE	TRUE	0.492251	66	0	38	28	G	synonymous_variant	LOW	Y6D1A.1	WBGene00012395	transcript	Y6D1A.1	protein_coding
II	11821716	C	[T]	{C, T}	0.0151515	1	TRUE	FALSE	TRUE	0.0300717	66	0	1	65	T	synonymous_variant	LOW	Y6D1A.1	WBGene00012395	transcript	Y6D1A.1	protein_coding
II	11821752	G	[A]	{G, A}	0.0151515	1	TRUE	FALSE	TRUE	0.0300717	66	0	1	65	A	synonymous_variant	LOW	Y6D1A.1	WBGene00012395	transcript	Y6D1A.1	protein_coding
II	11822037	T	[C]	{C, T}	0.0153846	1	TRUE	FALSE	TRUE	0.0305307	65	0	1	64	C	synonymous_variant	LOW	Y6D1A.1	WBGene00012395	transcript	Y6D1A.1	protein_coding
II	11822148	T	[C]	{C, T}	0.030303	1	TRUE	FALSE	TRUE	0.0592181	66	0	2	64	C	synonymous_variant	LOW	Y6D1A.1	WBGene00012395	transcript	Y6D1A.1	protein_coding
II	11822283	A	[C]	{C, A}	0.0151515	1	TRUE	FALSE	FALSE	0.0300717	66	0	1	65	C	synonymous_variant	LOW	Y6D1A.1	WBGene00012395	transcript	Y6D1A.1	protein_coding
II	11822873	T	[C]	{C, T}	0.0151515	1	TRUE	FALSE	TRUE	0.0300717	66	0	1	65	C	splice_region_variant&intron_variant	LOW	Y6D1A.1	WBGene00012395	transcript	Y6D1A.1	protein_coding
II	11823049	T	[C]	{C, T}	0.151515	1	TRUE	FALSE	TRUE	0.259079	66	0	10	56	C	synonymous_variant	LOW	Y6D1A.1	WBGene00012395	transcript	Y6D1A.1	protein_coding
II	11823217	C	[T]	{C, T}	0.0757576	1	TRUE	FALSE	TRUE	0.141106	66	0	5	61	T	synonymous_variant	LOW	Y6D1A.1	WBGene00012395	transcript	Y6D1A.1	protein_coding
II	11828289	C	[T]	{C, T}	0.0454545	1	TRUE	FALSE	TRUE	0.0874393	66	0	3	63	T	synonymous_variant	LOW	pes-5	WBGene00003979	transcript	T27D12.4a	protein_coding
II	11828674	C	[T]	{C, T}	0.166667	1	TRUE	FALSE	TRUE	0.279898	66	0	11	55	T	splice_region_variant&intron_variant	LOW	pes-5	WBGene00003979	transcript	T27D12.4a	protein_coding
II	11828759	G	[A]	{G, A}	0.0606061	1	TRUE	FALSE	TRUE	0.114735	66	0	4	62	A	synonymous_variant	LOW	pes-5	WBGene00003979	transcript	T27D12.4a	protein_coding
II	11829062	T	[G]	{G, T}	0.227273	1	TRUE	FALSE	FALSE	0.353921	66	0	15	51	G	synonymous_variant	LOW	pes-5	WBGene00003979	transcript	T27D12.4a	protein_coding
II	11829074	T	[C]	{C, T}	0.227273	1	TRUE	FALSE	TRUE	0.353921	66	0	15	51	C	synonymous_variant	LOW	pes-5	WBGene00003979	transcript	T27D12.4a	protein_coding
II	11829146	C	[T]	{C, T}	0.227273	1	TRUE	FALSE	TRUE	0.353921	66	0	15	51	T	synonymous_variant	LOW	pes-5	WBGene00003979	transcript	T27D12.4a	protein_coding
II	11829479	G	[A]	{G, A}	0.0151515	1	TRUE	FALSE	TRUE	0.0300717	66	0	1	65	A	synonymous_variant	LOW	pes-5	WBGene00003979	transcript	T27D12.4a	protein_coding
II	11829961	G	[T]	{G, T}	0.030303	1	TRUE	FALSE	FALSE	0.0592181	66	0	2	64	T	synonymous_variant	LOW	pes-5	WBGene00003979	transcript	T27D12.4a	protein_coding
II	11831608	A	[T]	{A, T}	0.0454545	1	TRUE	FALSE	FALSE	0.0874393	66	0	3	63	T	synonymous_variant	LOW	clec-144	WBGene00012086	transcript	T27D12.3	protein_coding
II	11832021	A	[T]	{A, T}	0.181818	1	TRUE	FALSE	FALSE	0.299792	66	0	12	54	T	splice_region_variant&intron_variant	LOW	clec-144	WBGene00012086	transcript	T27D12.3	protein_coding
II	11837522	G	[A]	{G, A}	0.0454545	1	TRUE	FALSE	TRUE	0.0874393	66	0	3	63	A	splice_region_variant	LOW	T27D12.6	WBGene00194848	transcript	T27D12.6	protein_coding
II	11843382	GT	[G]	{G, GT}	0.0454545	1	FALSE	TRUE	FALSE	0.0874393	66	0	3	63	G	splice_region_variant&intron_variant	LOW	T27D12.1	WBGene00012085	transcript	T27D12.1b	protein_coding
II	11843600	A	[G]	{G, A}	0.166667	1	TRUE	FALSE	TRUE	0.279898	66	0	11	55	G	synonymous_variant	LOW	T27D12.1	WBGene00012085	transcript	T27D12.1b	protein_coding
II	11843921	GT	[G]	{G, GT}	0.378788	1	FALSE	TRUE	FALSE	0.474208	66	2	24	40	G	splice_region_variant&intron_variant	LOW	T27D12.1	WBGene00012085	transcript	T27D12.1b	protein_coding
II	11844278	C	[T]	{C, T}	0.0151515	1	TRUE	FALSE	TRUE	0.0300717	66	0	1	65	T	synonymous_variant	LOW	T27D12.1	WBGene00012085	transcript	T27D12.1b	protein_coding
II	11845383	A	[G]	{G, A}	0.0454545	1	TRUE	FALSE	TRUE	0.0874393	66	0	3	63	G	synonymous_variant	LOW	T27D12.1	WBGene00012085	transcript	T27D12.1b	protein_coding
II	11847080	C	[T]	{C, T}	0.0606061	1	TRUE	FALSE	TRUE	0.114735	66	0	4	62	T	synonymous_variant	LOW	clh-1	WBGene00000528	transcript	T27D12.2a	protein_coding
II	11847122	A	[C]	{C, A}	0.0151515	1	TRUE	FALSE	FALSE	0.0300717	66	0	1	65	C	synonymous_variant	LOW	clh-1	WBGene00000528	transcript	T27D12.2a	protein_coding
II	11847383	G	[A]	{G, A}	0.166667	1	TRUE	FALSE	TRUE	0.279898	66	0	11	55	A	splice_region_variant&synonymous_variant	LOW	clh-1	WBGene00000528	transcript	T27D12.2a	protein_coding
II	11847731	A	[G]	{G, A}	0.166667	1	TRUE	FALSE	TRUE	0.279898	66	0	11	55	G	synonymous_variant	LOW	clh-1	WBGene00000528	transcript	T27D12.2a	protein_coding
II	11848661	TG	[T]	{TG, T}	0.166667	1	FALSE	TRUE	FALSE	0.279898	66	0	11	55	T	splice_region_variant&intron_variant	LOW	clh-1	WBGene00000528	transcript	T27D12.2a	protein_coding
II	11848667	T	[C]	{C, T}	0.0757576	1	TRUE	FALSE	TRUE	0.141106	66	0	5	61	C	splice_region_variant&intron_variant	LOW	clh-1	WBGene00000528	transcript	T27D12.2a	protein_coding
II	11848827	A	[G]	{G, A}	0.0151515	1	TRUE	FALSE	TRUE	0.0300717	66	0	1	65	G	synonymous_variant	LOW	clh-1	WBGene00000528	transcript	T27D12.2a	protein_coding
II	11849208	C	[T]	{C, T}	0.227273	1	TRUE	FALSE	TRUE	0.353921	66	0	15	51	T	synonymous_variant	LOW	clh-1	WBGene00000528	transcript	T27D12.2a	protein_coding
II	11849291	A	[G]	{G, A}	0.893939	1	TRUE	FALSE	TRUE	0.191071	66	0	59	7	G	synonymous_variant	LOW	clh-1	WBGene00000528	transcript	T27D12.2a	protein_coding
II	11850467	G	[A]	{G, A}	0.0606061	1	TRUE	FALSE	TRUE	0.114735	66	0	4	62	A	synonymous_variant	LOW	clh-1	WBGene00000528	transcript	T27D12.2a	protein_coding
II	11850817	A	[T]	{A, T}	0.166667	1	TRUE	FALSE	FALSE	0.279898	66	0	11	55	T	splice_region_variant&intron_variant	LOW	clh-1	WBGene00000528	transcript	T27D12.2a	protein_coding
II	11854632	G	[C]	{C, G}	0.0757576	1	TRUE	FALSE	FALSE	0.141106	66	0	5	61	C	synonymous_variant	LOW	clh-1	WBGene00000528	transcript	T27D12.2a	protein_coding
II	11862433	T	[C]	{C, T}	0.151515	1	TRUE	FALSE	TRUE	0.259079	66	0	10	56	C	splice_region_variant&intron_variant	LOW	K12D12.5	WBGene00010787	transcript	K12D12.5	protein_coding
II	11862864	A	[G]	{G, A}	0.166667	1	TRUE	FALSE	TRUE	0.279898	66	0	11	55	G	synonymous_variant	LOW	K12D12.5	WBGene00010787	transcript	K12D12.5	protein_coding
II	11863528	G	[A]	{G, A}	0.0153846	1	TRUE	FALSE	TRUE	0.0305307	65	0	1	64	A	synonymous_variant	LOW	K12D12.4	WBGene00010786	transcript	K12D12.4	protein_coding
II	11863697	A	[C]	{C, A}	0.0153846	1	TRUE	FALSE	FALSE	0.0305307	65	0	1	64	C	splice_region_variant&intron_variant	LOW	K12D12.4	WBGene00010786	transcript	K12D12.4	protein_coding
II	11863877	C	[T]	{C, T}	0.0461538	1	TRUE	FALSE	TRUE	0.0887299	65	0	3	62	T	synonymous_variant	LOW	K12D12.4	WBGene00010786	transcript	K12D12.4	protein_coding
II	11863889	T	[C]	{C, T}	0.727273	1	TRUE	FALSE	TRUE	0.399722	66	0	48	18	C	synonymous_variant	LOW	K12D12.4	WBGene00010786	transcript	K12D12.4	protein_coding
II	11864004	G	[A]	{G, A}	0.0151515	1	TRUE	FALSE	TRUE	0.0300717	66	0	1	65	A	synonymous_variant	LOW	K12D12.4	WBGene00010786	transcript	K12D12.4	protein_coding
II	11864121	G	[GA]	{G, GA}	0.0909091	1	FALSE	TRUE	FALSE	0.166551	66	0	6	60	GA	splice_region_variant&intron_variant	LOW	K12D12.4	WBGene00010786	transcript	K12D12.4	protein_coding
II	11864403	C	[T]	{C, T}	0.166667	1	TRUE	FALSE	TRUE	0.279898	66	0	11	55	T	synonymous_variant	LOW	K12D12.4	WBGene00010786	transcript	K12D12.4	protein_coding
II	11864724	T	[G]	{G, T}	0.0606061	1	TRUE	FALSE	FALSE	0.114735	66	0	4	62	G	splice_region_variant&synonymous_variant	LOW	K12D12.4	WBGene00010786	transcript	K12D12.4	protein_coding
II	11864822	T	[C]	{C, T}	0.0606061	1	TRUE	FALSE	TRUE	0.114735	66	0	4	62	C	splice_region_variant&intron_variant	LOW	K12D12.4	WBGene00010786	transcript	K12D12.4	protein_coding
II	11865671	TA	[T]	{TA, T}	0.876923	1	FALSE	TRUE	FALSE	0.217531	65	0	57	8	T	splice_region_variant	LOW	npp-3	WBGene00003789	transcript	K12D12.2.1	protein_coding
II	11865989	A	[G]	{G, A}	0.353846	1	TRUE	FALSE	TRUE	0.460823	65	0	23	42	G	synonymous_variant	LOW	npp-3	WBGene00003789	transcript	K12D12.2.1	protein_coding
II	11866016	G	[A]	{G, A}	0.0153846	1	TRUE	FALSE	TRUE	0.0305307	65	0	1	64	A	synonymous_variant	LOW	npp-3	WBGene00003789	transcript	K12D12.2.1	protein_coding
II	11866127	G	[GA]	{G, GA}	0.0307692	1	FALSE	TRUE	FALSE	0.0601073	65	0	2	63	GA	splice_region_variant&intron_variant	LOW	npp-3	WBGene00003789	transcript	K12D12.2.1	protein_coding
II	11866799	A	[G]	{G, A}	0.0454545	1	TRUE	FALSE	TRUE	0.0874393	66	0	3	63	G	synonymous_variant	LOW	npp-3	WBGene00003789	transcript	K12D12.2.1	protein_coding
II	11868148	A	[G]	{G, A}	0.0606061	1	TRUE	FALSE	TRUE	0.114735	66	0	4	62	G	synonymous_variant	LOW	npp-3	WBGene00003789	transcript	K12D12.2.1	protein_coding
II	11868646	C	[T]	{C, T}	0.0757576	1	TRUE	FALSE	TRUE	0.141106	66	0	5	61	T	synonymous_variant	LOW	col-84	WBGene00000659	transcript	K12D12.3	protein_coding
II	11868664	C	[T]	{C, T}	0.0151515	1	TRUE	FALSE	TRUE	0.0300717	66	0	1	65	T	synonymous_variant	LOW	col-84	WBGene00000659	transcript	K12D12.3	protein_coding
II	11868803	A	[G]	{G, A}	0.0151515	1	TRUE	FALSE	TRUE	0.0300717	66	0	1	65	G	synonymous_variant	LOW	col-84	WBGene00000659	transcript	K12D12.3	protein_coding
II	11868998	A	[T]	{A, T}	0.0151515	1	TRUE	FALSE	FALSE	0.0300717	66	0	1	65	T	synonymous_variant	LOW	col-84	WBGene00000659	transcript	K12D12.3	protein_coding
II	11869794	T	[A]	{A, T}	0.166667	1	TRUE	FALSE	FALSE	0.279898	66	0	11	55	A	synonymous_variant	LOW	npp-3	WBGene00003789	transcript	K12D12.2.1	protein_coding
II	11870119	G	[A]	{G, A}	0.0151515	1	TRUE	FALSE	TRUE	0.0300717	66	0	1	65	A	synonymous_variant	LOW	npp-3	WBGene00003789	transcript	K12D12.2.1	protein_coding
II	11870167	A	[G]	{G, A}	0.0151515	1	TRUE	FALSE	TRUE	0.0300717	66	0	1	65	G	synonymous_variant	LOW	npp-3	WBGene00003789	transcript	K12D12.2.1	protein_coding
II	11870356	T	[C]	{C, T}	0.272727	1	TRUE	FALSE	TRUE	0.399722	66	0	18	48	C	synonymous_variant	LOW	npp-3	WBGene00003789	transcript	K12D12.2.1	protein_coding
II	11870693	G	[C]	{C, G}	0.348485	1	TRUE	FALSE	FALSE	0.457553	66	0	23	43	C	splice_region_variant&intron_variant	LOW	npp-3	WBGene00003789	transcript	K12D12.2.1	protein_coding
II	11871068	C	[A]	{C, A}	0.0769231	1	TRUE	FALSE	FALSE	0.143113	65	0	5	60	A	synonymous_variant	LOW	npp-3	WBGene00003789	transcript	K12D12.2.1	protein_coding
II	11871284	A	[G]	{G, A}	0.0153846	1	TRUE	FALSE	TRUE	0.0305307	65	0	1	64	G	synonymous_variant	LOW	npp-3	WBGene00003789	transcript	K12D12.2.1	protein_coding
II	11871415	GA	[G]	{G, GA}	0.0461538	1	FALSE	TRUE	FALSE	0.0887299	65	0	3	62	G	splice_region_variant&intron_variant	LOW	npp-3	WBGene00003789	transcript	K12D12.2.1	protein_coding
II	11872005	A	[C]	{C, A}	0.0166667	1	TRUE	FALSE	FALSE	0.0330532	60	0	1	59	C	splice_region_variant&synonymous_variant	LOW	npp-3	WBGene00003789	transcript	K12D12.2.1	protein_coding
II	11872008	T	[C]	{C, T}	0.0333333	1	TRUE	FALSE	TRUE	0.064986	60	0	2	58	C	synonymous_variant	LOW	npp-3	WBGene00003789	transcript	K12D12.2.1	protein_coding
II	11872134	G	[T]	{G, T}	0.183333	1	TRUE	FALSE	FALSE	0.301961	60	0	11	49	T	synonymous_variant	LOW	npp-3	WBGene00003789	transcript	K12D12.2.1	protein_coding
II	11872863	T	[A]	{A, T}	0.177419	1	TRUE	FALSE	FALSE	0.294256	62	0	11	51	A	synonymous_variant	LOW	npp-3	WBGene00003789	transcript	K12D12.2.1	protein_coding
II	11873019	T	[A]	{A, T}	0.774194	1	TRUE	FALSE	FALSE	0.352478	62	0	48	14	A	synonymous_variant	LOW	npp-3	WBGene00003789	transcript	K12D12.2.1	protein_coding
II	11873076	A	[G]	{G, A}	0.177419	1	TRUE	FALSE	TRUE	0.294256	62	0	11	51	G	synonymous_variant	LOW	npp-3	WBGene00003789	transcript	K12D12.2.1	protein_coding
II	11873169	T	[A]	{A, T}	0.016129	1	TRUE	FALSE	FALSE	0.0319958	62	0	1	61	A	synonymous_variant	LOW	npp-3	WBGene00003789	transcript	K12D12.2.1	protein_coding
II	11873283	C	[T]	{C, T}	0.016129	1	TRUE	FALSE	TRUE	0.0319958	62	0	1	61	T	synonymous_variant	LOW	npp-3	WBGene00003789	transcript	K12D12.2.1	protein_coding
II	11873502	T	[A]	{A, T}	0.177419	1	TRUE	FALSE	FALSE	0.294256	62	0	11	51	A	synonymous_variant	LOW	npp-3	WBGene00003789	transcript	K12D12.2.1	protein_coding
II	11873866	T	[C]	{C, T}	0.193548	1	TRUE	FALSE	TRUE	0.314713	62	0	12	50	C	synonymous_variant	LOW	npp-3	WBGene00003789	transcript	K12D12.2.1	protein_coding
II	11874047	T	[G]	{G, T}	0.0151515	1	TRUE	FALSE	FALSE	0.0300717	66	0	1	65	G	synonymous_variant	LOW	npp-3	WBGene00003789	transcript	K12D12.2.1	protein_coding
II	11874491	C	[T]	{C, T}	0.0151515	1	TRUE	FALSE	TRUE	0.0300717	66	0	1	65	T	synonymous_variant	LOW	npp-3	WBGene00003789	transcript	K12D12.2.1	protein_coding
II	11875338	C	[T]	{C, T}	0.0151515	1	TRUE	FALSE	TRUE	0.0300717	66	0	1	65	T	synonymous_variant	LOW	top-2	WBGene00010785	transcript	K12D12.1	protein_coding
II	11875374	C	[G]	{C, G}	0.0454545	1	TRUE	FALSE	FALSE	0.0874393	66	0	3	63	G	synonymous_variant	LOW	top-2	WBGene00010785	transcript	K12D12.1	protein_coding
II	11875467	G	[A]	{G, A}	0.378788	1	TRUE	FALSE	TRUE	0.474208	66	0	25	41	A	synonymous_variant	LOW	top-2	WBGene00010785	transcript	K12D12.1	protein_coding
II	11876198	C	[T]	{C, T}	0.0151515	1	TRUE	FALSE	TRUE	0.0300717	66	0	1	65	T	synonymous_variant	LOW	top-2	WBGene00010785	transcript	K12D12.1	protein_coding
II	11877112	C	[T]	{C, T}	0.0151515	1	TRUE	FALSE	TRUE	0.0300717	66	0	1	65	T	synonymous_variant	LOW	top-2	WBGene00010785	transcript	K12D12.1	protein_coding
II	11877259	C	[T]	{C, T}	0.181818	1	TRUE	FALSE	TRUE	0.299792	66	0	12	54	T	synonymous_variant	LOW	top-2	WBGene00010785	transcript	K12D12.1	protein_coding
II	11877529	G	[A]	{G, A}	0.378788	1	TRUE	FALSE	TRUE	0.474208	66	0	25	41	A	synonymous_variant	LOW	top-2	WBGene00010785	transcript	K12D12.1	protein_coding
II	11877619	T	[G]	{G, T}	0.0454545	1	TRUE	FALSE	FALSE	0.0874393	66	0	3	63	G	synonymous_variant	LOW	top-2	WBGene00010785	transcript	K12D12.1	protein_coding
II	11878054	A	[T]	{A, T}	0.378788	1	TRUE	FALSE	FALSE	0.474208	66	0	25	41	T	synonymous_variant	LOW	top-2	WBGene00010785	transcript	K12D12.1	protein_coding
II	11878249	A	[G]	{G, A}	0.0151515	1	TRUE	FALSE	TRUE	0.0300717	66	0	1	65	G	synonymous_variant	LOW	top-2	WBGene00010785	transcript	K12D12.1	protein_coding
II	11878321	C	[A]	{C, A}	0.651515	1	TRUE	FALSE	FALSE	0.457553	66	0	43	23	A	synonymous_variant	LOW	top-2	WBGene00010785	transcript	K12D12.1	protein_coding
II	11878408	A	[C]	{C, A}	0.166667	1	TRUE	FALSE	FALSE	0.279898	66	0	11	55	C	synonymous_variant	LOW	top-2	WBGene00010785	transcript	K12D12.1	protein_coding
II	11878615	T	[C]	{C, T}	0.0151515	1	TRUE	FALSE	TRUE	0.0300717	66	0	1	65	C	synonymous_variant	LOW	top-2	WBGene00010785	transcript	K12D12.1	protein_coding
II	11879428	G	[A]	{G, A}	0.378788	1	TRUE	FALSE	TRUE	0.474208	66	0	25	41	A	synonymous_variant	LOW	top-2	WBGene00010785	transcript	K12D12.1	protein_coding
II	11880264	G	[A]	{G, A}	0.0151515	1	TRUE	FALSE	TRUE	0.0300717	66	0	1	65	A	synonymous_variant	LOW	top-2	WBGene00010785	transcript	K12D12.1	protein_coding
II	11882625	G	[T]	{G, T}	0.0153846	1	TRUE	FALSE	FALSE	0.0305307	65	0	1	64	T	synonymous_variant	LOW	ZK930.5	WBGene00014155	transcript	ZK930.5	protein_coding
II	11883349	T	[C]	{C, T}	0.378788	1	TRUE	FALSE	TRUE	0.474208	66	0	25	41	C	synonymous_variant	LOW	ZK930.5	WBGene00014155	transcript	ZK930.5	protein_coding
II	11883427	A	[G]	{G, A}	0.030303	1	TRUE	FALSE	TRUE	0.0592181	66	0	2	64	G	synonymous_variant	LOW	ZK930.5	WBGene00014155	transcript	ZK930.5	protein_coding
II	11891130	C	[A]	{C, A}	0.0151515	1	TRUE	FALSE	FALSE	0.0300717	66	0	1	65	A	synonymous_variant	LOW	ZK930.2	WBGene00014152	transcript	ZK930.2	protein_coding
II	11891801	C	[T]	{C, T}	0.0151515	1	TRUE	FALSE	TRUE	0.0300717	66	0	1	65	T	synonymous_variant	LOW	ZK930.2	WBGene00014152	transcript	ZK930.2	protein_coding
II	11891840	A	[G]	{G, A}	0.0606061	1	TRUE	FALSE	TRUE	0.114735	66	0	4	62	G	synonymous_variant	LOW	ZK930.2	WBGene00014152	transcript	ZK930.2	protein_coding
II	11892927	GA	[G]	{G, GA}	0.030303	1	FALSE	TRUE	FALSE	0.0592181	66	0	2	64	G	splice_region_variant&intron_variant	LOW	ZK930.2	WBGene00014152	transcript	ZK930.2	protein_coding
II	11898128	T	[C]	{C, T}	0.0151515	1	TRUE	FALSE	TRUE	0.0300717	66	0	1	65	C	synonymous_variant	LOW	vab-23	WBGene00014153	transcript	ZK930.3a	protein_coding
II	11898329	T	[C]	{C, T}	0.0757576	1	TRUE	FALSE	TRUE	0.141106	66	0	5	61	C	synonymous_variant	LOW	vab-23	WBGene00014153	transcript	ZK930.3a	protein_coding
II	11898332	G	[C]	{C, G}	0.0606061	1	TRUE	FALSE	FALSE	0.114735	66	0	4	62	C	synonymous_variant	LOW	vab-23	WBGene00014153	transcript	ZK930.3a	protein_coding
II	11898496	G	[A]	{G, A}	0.0757576	1	TRUE	FALSE	TRUE	0.141106	66	0	5	61	A	synonymous_variant	LOW	vab-23	WBGene00014153	transcript	ZK930.3a	protein_coding
II	11901163	G	[C]	{C, G}	0.0153846	1	TRUE	FALSE	FALSE	0.0305307	65	0	1	64	C	synonymous_variant	LOW	vab-23	WBGene00014153	transcript	ZK930.3a	protein_coding
II	11906607	G	[A]	{G, A}	0.0454545	1	TRUE	FALSE	TRUE	0.0874393	66	0	3	63	A	splice_region_variant&synonymous_variant	LOW	ZK930.4	WBGene00014154	transcript	ZK930.4	protein_coding
II	11907775	C	[T]	{C, T}	0.0153846	1	TRUE	FALSE	TRUE	0.0305307	65	0	1	64	T	synonymous_variant	LOW	ZK930.4	WBGene00014154	transcript	ZK930.4	protein_coding
II	11908334	G	[A]	{G, A}	0.0151515	1	TRUE	FALSE	TRUE	0.0300717	66	0	1	65	A	synonymous_variant	LOW	ZK930.4	WBGene00014154	transcript	ZK930.4	protein_coding
II	11908967	C	[T]	{C, T}	0.0151515	1	TRUE	FALSE	TRUE	0.0300717	66	0	1	65	T	synonymous_variant	LOW	vps-15	WBGene00014151	transcript	ZK930.1a	protein_coding
II	11909403	A	[G]	{G, A}	0.030303	1	TRUE	FALSE	TRUE	0.0592181	66	0	2	64	G	synonymous_variant	LOW	vps-15	WBGene00014151	transcript	ZK930.1a	protein_coding
II	11910180	A	[C]	{C, A}	0.151515	1	TRUE	FALSE	FALSE	0.259079	66	0	10	56	C	splice_region_variant&intron_variant	LOW	vps-15	WBGene00014151	transcript	ZK930.1a	protein_coding
II	11910256	A	[T]	{A, T}	0.848485	1	TRUE	FALSE	FALSE	0.259079	66	0	56	10	T	synonymous_variant	LOW	vps-15	WBGene00014151	transcript	ZK930.1a	protein_coding
II	11910259	G	[T]	{G, T}	0.030303	1	TRUE	FALSE	FALSE	0.0592181	66	0	2	64	T	synonymous_variant	LOW	vps-15	WBGene00014151	transcript	ZK930.1a	protein_coding
II	11911144	T	[C]	{C, T}	0.166667	1	TRUE	FALSE	TRUE	0.279898	66	0	11	55	C	splice_region_variant&intron_variant	LOW	vps-15	WBGene00014151	transcript	ZK930.1a	protein_coding
II	11911498	G	[C]	{C, G}	0.0757576	1	TRUE	FALSE	FALSE	0.141106	66	0	5	61	C	synonymous_variant	LOW	vps-15	WBGene00014151	transcript	ZK930.1a	protein_coding
II	11911636	A	[G]	{G, A}	0.0606061	1	TRUE	FALSE	TRUE	0.114735	66	0	4	62	G	synonymous_variant	LOW	vps-15	WBGene00014151	transcript	ZK930.1a	protein_coding
II	11911799	A	[G]	{G, A}	0.0909091	1	TRUE	FALSE	TRUE	0.166551	66	0	6	60	G	synonymous_variant	LOW	vps-15	WBGene00014151	transcript	ZK930.1a	protein_coding
II	11912449	A	[G]	{G, A}	0.181818	1	TRUE	FALSE	TRUE	0.299792	66	0	12	54	G	synonymous_variant	LOW	vps-15	WBGene00014151	transcript	ZK930.1a	protein_coding
II	11912558	T	[C]	{C, T}	0.151515	1	TRUE	FALSE	TRUE	0.259079	66	0	10	56	C	synonymous_variant	LOW	vps-15	WBGene00014151	transcript	ZK930.1a	protein_coding
II	11913230	G	[A]	{G, A}	0.0151515	1	TRUE	FALSE	TRUE	0.0300717	66	0	1	65	A	synonymous_variant	LOW	vps-15	WBGene00014151	transcript	ZK930.1a	protein_coding
II	11913293	T	[C]	{C, T}	0.0151515	1	TRUE	FALSE	TRUE	0.0300717	66	0	1	65	C	synonymous_variant	LOW	vps-15	WBGene00014151	transcript	ZK930.1a	protein_coding
II	11913482	A	[G]	{G, A}	0.0151515	1	TRUE	FALSE	TRUE	0.0300717	66	0	1	65	G	splice_region_variant&intron_variant	LOW	vps-15	WBGene00014151	transcript	ZK930.1a	protein_coding
II	11915652	G	[T]	{G, T}	0.0769231	1	TRUE	FALSE	FALSE	0.143113	65	0	5	60	T	synonymous_variant	LOW	vps-15	WBGene00014151	transcript	ZK930.1a	protein_coding
II	11916540	C	[T]	{C, T}	0.0307692	1	TRUE	FALSE	TRUE	0.0601073	65	0	2	63	T	synonymous_variant	LOW	hmg-12	WBGene00001977	transcript	Y17G7A.1	protein_coding
II	11916558	C	[T]	{C, T}	0.0615385	1	TRUE	FALSE	TRUE	0.116398	65	0	4	61	T	synonymous_variant	LOW	hmg-12	WBGene00001977	transcript	Y17G7A.1	protein_coding
II	11916809	T	[A]	{A, T}	0.0153846	1	TRUE	FALSE	FALSE	0.0305307	65	0	1	64	A	synonymous_variant	LOW	hmg-12	WBGene00001977	transcript	Y17G7A.1	protein_coding
II	11916902	C	[T]	{C, T}	0.0153846	1	TRUE	FALSE	TRUE	0.0305307	65	0	1	64	T	synonymous_variant	LOW	hmg-12	WBGene00001977	transcript	Y17G7A.1	protein_coding
II	11919498	A	[G]	{G, A}	0.166667	1	TRUE	FALSE	TRUE	0.279898	66	0	11	55	G	synonymous_variant	LOW	lin-29	WBGene00003015	transcript	W03C9.4a	protein_coding
II	11920137	G	[A]	{G, A}	0.0606061	1	TRUE	FALSE	TRUE	0.114735	66	0	4	62	A	synonymous_variant	LOW	lin-29	WBGene00003015	transcript	W03C9.4a	protein_coding
II	11920556	C	[T]	{C, T}	0.409091	1	TRUE	FALSE	TRUE	0.487162	66	0	27	39	T	synonymous_variant	LOW	lin-29	WBGene00003015	transcript	W03C9.4a	protein_coding
II	11933120	T	[A]	{A, T}	0.0151515	1	TRUE	FALSE	FALSE	0.0300717	66	0	1	65	A	synonymous_variant	LOW	lin-29	WBGene00003015	transcript	W03C9.4a	protein_coding
II	11933156	A	[T]	{A, T}	0.151515	1	TRUE	FALSE	FALSE	0.259079	66	0	10	56	T	synonymous_variant	LOW	lin-29	WBGene00003015	transcript	W03C9.4a	protein_coding
II	11933186	T	[G]	{G, T}	0.136364	1	TRUE	FALSE	FALSE	0.237335	66	0	9	57	G	synonymous_variant	LOW	lin-29	WBGene00003015	transcript	W03C9.4a	protein_coding
II	11948835	G	[A]	{G, A}	0.0153846	1	TRUE	FALSE	TRUE	0.0305307	65	0	1	64	A	splice_region_variant&intron_variant	LOW	W03C9.8	WBGene00012223	transcript	W03C9.8	protein_coding
II	11954558	C	[G]	{C, G}	0.0151515	1	TRUE	FALSE	FALSE	0.0300717	66	0	1	65	G	synonymous_variant	LOW	W03C9.6	WBGene00012222	transcript	W03C9.6.1	protein_coding
II	11954868	G	[A]	{G, A}	0.0151515	1	TRUE	FALSE	TRUE	0.0300717	66	0	1	65	A	synonymous_variant	LOW	W03C9.6	WBGene00012222	transcript	W03C9.6.1	protein_coding
II	11958322	C	[A]	{C, A}	0.030303	1	TRUE	FALSE	FALSE	0.0592181	66	0	2	64	A	synonymous_variant	LOW	W03C9.6	WBGene00012222	transcript	W03C9.6.1	protein_coding
II	11959164	C	[A]	{C, A}	0.151515	1	TRUE	FALSE	FALSE	0.259079	66	0	10	56	A	synonymous_variant	LOW	W03C9.6	WBGene00012222	transcript	W03C9.6.1	protein_coding
II	11959206	C	[T]	{C, T}	0.0151515	1	TRUE	FALSE	TRUE	0.0300717	66	0	1	65	T	synonymous_variant	LOW	W03C9.6	WBGene00012222	transcript	W03C9.6.1	protein_coding
II	11959517	T	[C]	{C, T}	0.878788	1	TRUE	FALSE	TRUE	0.214666	66	0	58	8	C	synonymous_variant	LOW	W03C9.6	WBGene00012222	transcript	W03C9.6.1	protein_coding
II	11959733	A	[T]	{A, T}	0.0151515	1	TRUE	FALSE	FALSE	0.0300717	66	0	1	65	T	synonymous_variant	LOW	W03C9.6	WBGene00012222	transcript	W03C9.6.1	protein_coding
II	11960030	C	[T]	{C, T}	0.166667	1	TRUE	FALSE	TRUE	0.279898	66	0	11	55	T	synonymous_variant	LOW	W03C9.6	WBGene00012222	transcript	W03C9.6.1	protein_coding
II	11961176	GAT	[G]	{G, GAT}	0.0151515	1	FALSE	TRUE	FALSE	0.0300717	66	0	1	65	G	splice_region_variant&intron_variant	LOW	W03C9.1	WBGene00012219	transcript	W03C9.1	protein_coding
II	11961296	C	[A]	{C, A}	0.0454545	1	TRUE	FALSE	FALSE	0.0874393	66	0	3	63	A	synonymous_variant	LOW	W03C9.1	WBGene00012219	transcript	W03C9.1	protein_coding
II	11961590	A	[G]	{G, A}	0.030303	1	TRUE	FALSE	TRUE	0.0592181	66	0	2	64	G	synonymous_variant	LOW	W03C9.1	WBGene00012219	transcript	W03C9.1	protein_coding
II	11961713	C	[T]	{C, T}	0.030303	1	TRUE	FALSE	TRUE	0.0592181	66	0	2	64	T	synonymous_variant	LOW	W03C9.1	WBGene00012219	transcript	W03C9.1	protein_coding
II	11962026	G	[A]	{G, A}	0.030303	1	TRUE	FALSE	TRUE	0.0592181	66	0	2	64	A	synonymous_variant	LOW	W03C9.1	WBGene00012219	transcript	W03C9.1	protein_coding
II	11964987	G	[A]	{G, A}	0.0151515	1	TRUE	FALSE	TRUE	0.0300717	66	0	1	65	A	synonymous_variant	LOW	W03C9.2	WBGene00012220	transcript	W03C9.2	protein_coding
II	11966437	C	[T]	{C, T}	0.0151515	1	TRUE	FALSE	TRUE	0.0300717	66	0	1	65	T	splice_region_variant&intron_variant	LOW	rab-7	WBGene00004271	transcript	W03C9.3.1	protein_coding
II	11966455	G	[A]	{G, A}	0.0454545	1	TRUE	FALSE	TRUE	0.0874393	66	0	3	63	A	synonymous_variant	LOW	rab-7	WBGene00004271	transcript	W03C9.3.1	protein_coding
II	11966595	T	[TG]	{TG, T}	0.106061	1	FALSE	TRUE	FALSE	0.191071	66	0	7	59	TG	splice_region_variant&intron_variant	LOW	rab-7	WBGene00004271	transcript	W03C9.3.1	protein_coding
II	11966637	C	[G]	{C, G}	0.0757576	1	TRUE	FALSE	FALSE	0.141106	66	0	5	61	G	splice_region_variant&intron_variant	LOW	rab-7	WBGene00004271	transcript	W03C9.3.1	protein_coding
II	11966831	A	[G]	{G, A}	0.0151515	1	TRUE	FALSE	TRUE	0.0300717	66	0	1	65	G	synonymous_variant	LOW	rab-7	WBGene00004271	transcript	W03C9.3.1	protein_coding
II	11966867	C	[A]	{C, A}	0.0151515	1	TRUE	FALSE	FALSE	0.0300717	66	0	1	65	A	synonymous_variant	LOW	rab-7	WBGene00004271	transcript	W03C9.3.1	protein_coding
II	11967191	G	[A]	{G, A}	0.893939	1	TRUE	FALSE	TRUE	0.191071	66	0	59	7	A	synonymous_variant	LOW	W03C9.5	WBGene00012221	transcript	W03C9.5	protein_coding
II	11968732	G	[A]	{G, A}	0.0151515	1	TRUE	FALSE	TRUE	0.0300717	66	0	1	65	A	synonymous_variant	LOW	mex-1	WBGene00003228	transcript	W03C9.7a.1	protein_coding
II	11968997	A	[G]	{G, A}	0.136364	1	TRUE	FALSE	TRUE	0.237335	66	0	9	57	G	splice_region_variant&intron_variant	LOW	mex-1	WBGene00003228	transcript	W03C9.7a.1	protein_coding
II	11969209	A	[C]	{C, A}	0.121212	1	TRUE	FALSE	FALSE	0.214666	66	0	8	58	C	synonymous_variant	LOW	mex-1	WBGene00003228	transcript	W03C9.7a.1	protein_coding
II	11969314	G	[A]	{G, A}	0.030303	1	TRUE	FALSE	TRUE	0.0592181	66	0	2	64	A	synonymous_variant	LOW	mex-1	WBGene00003228	transcript	W03C9.7a.1	protein_coding
II	11970176	T	[C]	{C, T}	0.0151515	1	TRUE	FALSE	TRUE	0.0300717	66	0	1	65	C	splice_region_variant&intron_variant	LOW	mex-1	WBGene00003228	transcript	W03C9.7a.1	protein_coding
II	11970438	T	[A]	{A, T}	0.030303	1	TRUE	FALSE	FALSE	0.0592181	66	0	2	64	A	synonymous_variant	LOW	mex-1	WBGene00003228	transcript	W03C9.7a.1	protein_coding
II	11970801	G	[A]	{G, A}	0.0151515	1	TRUE	FALSE	TRUE	0.0300717	66	0	1	65	A	synonymous_variant	LOW	mex-1	WBGene00003228	transcript	W03C9.7a.1	protein_coding
II	11971738	T	[C]	{C, T}	0.0151515	1	TRUE	FALSE	TRUE	0.0300717	66	0	1	65	C	synonymous_variant	LOW	mex-1	WBGene00003228	transcript	W03C9.7a.1	protein_coding
II	11972514	C	[T]	{C, T}	0.257576	1	TRUE	FALSE	TRUE	0.385381	66	0	17	49	T	synonymous_variant	LOW	acbp-6	WBGene00012457	transcript	Y17G7B.1	protein_coding
II	11976191	G	[A]	{G, A}	0.257576	1	TRUE	FALSE	TRUE	0.385381	66	0	17	49	A	synonymous_variant	LOW	Y17G7B.21	WBGene00012472	transcript	Y17G7B.21a	protein_coding
II	11977280	A	[G]	{G, A}	0.424242	1	TRUE	FALSE	TRUE	0.492251	66	0	28	38	G	splice_region_variant&intron_variant	LOW	Y17G7B.21	WBGene00012472	transcript	Y17G7B.21a	protein_coding
II	11977281	A	[G]	{G, A}	0.0454545	1	TRUE	FALSE	TRUE	0.0874393	66	0	3	63	G	splice_region_variant&intron_variant	LOW	Y17G7B.21	WBGene00012472	transcript	Y17G7B.21a	protein_coding
II	11977816	TTTTCAA	[T]	{TTTTCAA, T}	0.0454545	1	FALSE	TRUE	FALSE	0.0874393	66	0	3	63	T	splice_region_variant	LOW	Y17G7B.20	WBGene00012471	transcript	Y17G7B.20a	protein_coding
II	11978446	T	[C]	{C, T}	0.0151515	1	TRUE	FALSE	TRUE	0.0300717	66	0	1	65	C	synonymous_variant	LOW	Y17G7B.20	WBGene00012471	transcript	Y17G7B.20a	protein_coding
II	11978494	C	[A]	{C, A}	0.0151515	1	TRUE	FALSE	FALSE	0.0300717	66	0	1	65	A	synonymous_variant	LOW	Y17G7B.20	WBGene00012471	transcript	Y17G7B.20a	protein_coding
II	11978548	T	[C]	{C, T}	0.454545	1	TRUE	FALSE	TRUE	0.499653	66	0	30	36	C	synonymous_variant	LOW	Y17G7B.20	WBGene00012471	transcript	Y17G7B.20a	protein_coding
II	11978560	G	[A]	{G, A}	0.454545	1	TRUE	FALSE	TRUE	0.499653	66	0	30	36	A	synonymous_variant	LOW	Y17G7B.20	WBGene00012471	transcript	Y17G7B.20a	protein_coding
II	11978602	T	[C]	{C, T}	0.454545	1	TRUE	FALSE	TRUE	0.499653	66	0	30	36	C	synonymous_variant	LOW	Y17G7B.20	WBGene00012471	transcript	Y17G7B.20a	protein_coding
II	11978680	G	[A]	{G, A}	0.454545	1	TRUE	FALSE	TRUE	0.499653	66	0	30	36	A	synonymous_variant	LOW	Y17G7B.20	WBGene00012471	transcript	Y17G7B.20a	protein_coding
II	11978743	A	[G]	{G, A}	0.454545	1	TRUE	FALSE	TRUE	0.499653	66	0	30	36	G	synonymous_variant	LOW	Y17G7B.20	WBGene00012471	transcript	Y17G7B.20a	protein_coding
II	11978779	G	[A]	{G, A}	0.454545	1	TRUE	FALSE	TRUE	0.499653	66	0	30	36	A	synonymous_variant	LOW	Y17G7B.20	WBGene00012471	transcript	Y17G7B.20a	protein_coding
II	11978866	C	[G]	{C, G}	0.454545	1	TRUE	FALSE	FALSE	0.499653	66	0	30	36	G	synonymous_variant	LOW	Y17G7B.20	WBGene00012471	transcript	Y17G7B.20a	protein_coding
II	11980758	G	[T]	{G, T}	0.257576	1	TRUE	FALSE	FALSE	0.385381	66	0	17	49	T	splice_region_variant&intron_variant	LOW	ash-2	WBGene00012458	transcript	Y17G7B.2d	protein_coding
II	11980911	C	[A]	{C, A}	0.454545	1	TRUE	FALSE	FALSE	0.499653	66	0	30	36	A	synonymous_variant	LOW	ash-2	WBGene00012458	transcript	Y17G7B.2d	protein_coding
II	11982219	C	[T]	{C, T}	0.530303	1	TRUE	FALSE	TRUE	0.501966	66	0	35	31	T	synonymous_variant	LOW	ash-2	WBGene00012458	transcript	Y17G7B.2d	protein_coding
II	11982231	G	[C]	{C, G}	0.530303	1	TRUE	FALSE	FALSE	0.501966	66	0	35	31	C	synonymous_variant	LOW	ash-2	WBGene00012458	transcript	Y17G7B.2d	protein_coding
II	11982237	C	[T]	{C, T}	0.530303	1	TRUE	FALSE	TRUE	0.501966	66	0	35	31	T	synonymous_variant	LOW	ash-2	WBGene00012458	transcript	Y17G7B.2d	protein_coding
II	11984798	T	[C]	{C, T}	0.166667	1	TRUE	FALSE	TRUE	0.279898	66	0	11	55	C	synonymous_variant	LOW	ash-2	WBGene00012458	transcript	Y17G7B.2d	protein_coding
II	11984855	C	[T]	{C, T}	0.121212	1	TRUE	FALSE	TRUE	0.214666	66	0	8	58	T	synonymous_variant	LOW	ash-2	WBGene00012458	transcript	Y17G7B.2d	protein_coding
II	11987046	C	[T]	{C, T}	0.0151515	1	TRUE	FALSE	TRUE	0.0300717	66	0	1	65	T	synonymous_variant	LOW	ash-2	WBGene00012458	transcript	Y17G7B.2d	protein_coding
II	11987196	T	[G]	{G, T}	0.272727	1	TRUE	FALSE	FALSE	0.399722	66	0	18	48	G	synonymous_variant	LOW	ash-2	WBGene00012458	transcript	Y17G7B.2d	protein_coding
II	11987511	GTT	[GT, G, GTTT]	{GTT, GT, G}	0.296875	1	FALSE	TRUE	FALSE	0.420768	64	0	19	45	G	splice_region_variant&intron_variant	LOW	ash-2	WBGene00012458	transcript	Y17G7B.2d	protein_coding
II	11988240	C	[A]	{C, A}	0.030303	1	TRUE	FALSE	FALSE	0.0592181	66	0	2	64	A	synonymous_variant	LOW	ash-2	WBGene00012458	transcript	Y17G7B.2d	protein_coding
II	11988271	C	[T]	{C, T}	0.136364	1	TRUE	FALSE	TRUE	0.237335	66	0	9	57	T	synonymous_variant	LOW	ash-2	WBGene00012458	transcript	Y17G7B.2d	protein_coding
II	11989178	AT	[A]	{AT, A}	0.030303	1	FALSE	TRUE	FALSE	0.0592181	66	0	2	64	A	splice_region_variant&intron_variant	LOW	Y17G7B.3	WBGene00012459	transcript	Y17G7B.3	protein_coding
II	11990186	A	[G]	{G, A}	0.030303	1	TRUE	FALSE	TRUE	0.0592181	66	0	2	64	G	synonymous_variant	LOW	Y17G7B.3	WBGene00012459	transcript	Y17G7B.3	protein_coding
II	11990255	G	[A, T]	{G, A}	0.030303	1	TRUE	FALSE	FALSE	0.0592181	66	0	2	64	A	synonymous_variant	LOW	Y17G7B.3	WBGene00012459	transcript	Y17G7B.3	protein_coding
II	11991635	C	[T]	{C, T}	0.166667	1	TRUE	FALSE	TRUE	0.279898	66	0	11	55	T	synonymous_variant	LOW	Y17G7B.3	WBGene00012459	transcript	Y17G7B.3	protein_coding
II	11991755	T	[G, A]	{G, A, T}	0.893939	1	TRUE	FALSE	FALSE	0.191071	66	0	59	7	A	synonymous_variant	LOW	Y17G7B.3	WBGene00012459	transcript	Y17G7B.3	protein_coding
II	11993206	A	[C]	{C, A}	0.0153846	1	TRUE	FALSE	FALSE	0.0305307	65	0	1	64	C	synonymous_variant	LOW	dhps-1	WBGene00012460	transcript	Y17G7B.4	protein_coding
II	11993797	A	[T]	{A, T}	0.0151515	1	TRUE	FALSE	FALSE	0.0300717	66	0	1	65	T	splice_region_variant&intron_variant	LOW	dhps-1	WBGene00012460	transcript	Y17G7B.4	protein_coding
II	11995209	A	[T]	{A, T}	0.0151515	1	TRUE	FALSE	FALSE	0.0300717	66	0	1	65	T	synonymous_variant	LOW	dhps-1	WBGene00012460	transcript	Y17G7B.4	protein_coding
II	11995431	G	[A]	{G, A}	0.0151515	1	TRUE	FALSE	TRUE	0.0300717	66	0	1	65	A	synonymous_variant	LOW	dhps-1	WBGene00012460	transcript	Y17G7B.4	protein_coding
II	12000656	T	[C]	{C, T}	0.0151515	1	TRUE	FALSE	TRUE	0.0300717	66	0	1	65	C	synonymous_variant	LOW	Y17G7B.23	WBGene00044030	transcript	Y17G7B.23a	protein_coding
II	12000767	C	[T]	{C, T}	0.0151515	1	TRUE	FALSE	TRUE	0.0300717	66	0	1	65	T	synonymous_variant	LOW	Y17G7B.23	WBGene00044030	transcript	Y17G7B.23a	protein_coding
II	12001383	A	[G]	{G, A}	0.166667	1	TRUE	FALSE	TRUE	0.279898	66	0	11	55	G	synonymous_variant	LOW	Y17G7B.23	WBGene00044030	transcript	Y17G7B.23a	protein_coding
II	12001410	A	[G]	{G, A}	0.0151515	1	TRUE	FALSE	TRUE	0.0300717	66	0	1	65	G	synonymous_variant	LOW	Y17G7B.23	WBGene00044030	transcript	Y17G7B.23a	protein_coding
II	12001561	G	[T]	{G, T}	0.0606061	1	TRUE	FALSE	FALSE	0.114735	66	0	4	62	T	splice_region_variant	LOW	mcm-2	WBGene00003154	transcript	Y17G7B.5a.1	protein_coding
II	12003904	C	[G]	{C, G}	0.40625	1	TRUE	FALSE	FALSE	0.48622	64	0	26	38	G	synonymous_variant	LOW	mcm-2	WBGene00003154	transcript	Y17G7B.5a.1	protein_coding
II	12004129	C	[T]	{C, T}	0.015625	1	TRUE	FALSE	TRUE	0.0310039	64	0	1	63	T	synonymous_variant	LOW	mcm-2	WBGene00003154	transcript	Y17G7B.5a.1	protein_coding
II	12004288	G	[A]	{G, A}	0.125	1	TRUE	FALSE	TRUE	0.220472	64	0	8	56	A	synonymous_variant	LOW	mcm-2	WBGene00003154	transcript	Y17G7B.5a.1	protein_coding
II	12004291	G	[A]	{G, A}	0.40625	1	TRUE	FALSE	TRUE	0.48622	64	0	26	38	A	synonymous_variant	LOW	mcm-2	WBGene00003154	transcript	Y17G7B.5a.1	protein_coding
II	12005649	C	[T]	{C, T}	0.0151515	1	TRUE	FALSE	TRUE	0.0300717	66	0	1	65	T	synonymous_variant	LOW	mcm-2	WBGene00003154	transcript	Y17G7B.5a.1	protein_coding
II	12005664	C	[T]	{C, T}	0.318182	1	TRUE	FALSE	TRUE	0.437196	66	0	21	45	T	synonymous_variant	LOW	mcm-2	WBGene00003154	transcript	Y17G7B.5a.1	protein_coding
II	12006219	G	[A]	{G, A}	0.0151515	1	TRUE	FALSE	TRUE	0.0300717	66	0	1	65	A	synonymous_variant	LOW	mcm-2	WBGene00003154	transcript	Y17G7B.5a.1	protein_coding
II	12006495	C	[T]	{C, T}	0.0151515	1	TRUE	FALSE	TRUE	0.0300717	66	0	1	65	T	synonymous_variant	LOW	mcm-2	WBGene00003154	transcript	Y17G7B.5a.1	protein_coding
II	12016352	C	[T]	{C, T}	0.69697	1	TRUE	FALSE	TRUE	0.42563	66	0	46	20	T	synonymous_variant	LOW	glb-29	WBGene00012461	transcript	Y17G7B.6a	protein_coding
II	12016376	C	[T]	{C, T}	0.575758	1	TRUE	FALSE	TRUE	0.492251	66	0	38	28	T	splice_region_variant&intron_variant	LOW	glb-29	WBGene00012461	transcript	Y17G7B.6a	protein_coding
II	12023381	T	[G, A]	{G, T}	0.0757576	1	TRUE	FALSE	FALSE	0.141106	66	0	5	61	A	splice_region_variant&intron_variant	LOW	glb-29	WBGene00012461	transcript	Y17G7B.6a	protein_coding
II	12023589	C	[T]	{C, T}	0.106061	1	TRUE	FALSE	TRUE	0.191071	66	0	7	59	T	splice_region_variant&synonymous_variant	LOW	glb-29	WBGene00012461	transcript	Y17G7B.6a	protein_coding
II	12023631	C	[T]	{C, T}	0.0151515	1	TRUE	FALSE	TRUE	0.0300717	66	0	1	65	T	synonymous_variant	LOW	glb-29	WBGene00012461	transcript	Y17G7B.6a	protein_coding
II	12024156	C	[T]	{C, T}	0.0151515	1	TRUE	FALSE	TRUE	0.0300717	66	0	1	65	T	splice_region_variant&intron_variant	LOW	Y17G7B.12	WBGene00012465	transcript	Y17G7B.12	protein_coding
II	12024242	T	[TTTA]	{TTTA, T}	0.0151515	1	FALSE	TRUE	FALSE	0.0300717	66	0	1	65	TTTA	splice_region_variant&intron_variant	LOW	Y17G7B.12	WBGene00012465	transcript	Y17G7B.12	protein_coding
II	12024342	C	[T]	{C, T}	0.0151515	1	TRUE	FALSE	TRUE	0.0300717	66	0	1	65	T	synonymous_variant	LOW	Y17G7B.12	WBGene00012465	transcript	Y17G7B.12	protein_coding
II	12025318	A	[G]	{G, A}	0.363636	1	TRUE	FALSE	TRUE	0.466343	66	0	24	42	G	splice_region_variant&intron_variant	LOW	Y17G7B.12	WBGene00012465	transcript	Y17G7B.12	protein_coding
II	12026018	A	[G]	{G, A}	0.348485	1	TRUE	FALSE	TRUE	0.457553	66	0	23	43	G	splice_region_variant&intron_variant	LOW	Y17G7B.8	WBGene00012462	transcript	Y17G7B.8	protein_coding
II	12026288	G	[A]	{G, A}	0.909091	1	TRUE	FALSE	TRUE	0.166551	66	0	60	6	A	synonymous_variant	LOW	Y17G7B.8	WBGene00012462	transcript	Y17G7B.8	protein_coding
II	12026580	T	[A]	{A, T}	0.363636	1	TRUE	FALSE	FALSE	0.466343	66	0	24	42	A	splice_region_variant&intron_variant	LOW	Y17G7B.8	WBGene00012462	transcript	Y17G7B.8	protein_coding
II	12027075	C	[G]	{C, G}	0.0757576	1	TRUE	FALSE	FALSE	0.141106	66	0	5	61	G	synonymous_variant	LOW	Y17G7B.8	WBGene00012462	transcript	Y17G7B.8	protein_coding
II	12027156	C	[A]	{C, A}	0.0151515	1	TRUE	FALSE	FALSE	0.0300717	66	0	1	65	A	synonymous_variant	LOW	Y17G7B.8	WBGene00012462	transcript	Y17G7B.8	protein_coding
II	12028750	TTGAAAAATACAAC	[T]	{T, TTGAAAAATACAAC}	0.212121	1	FALSE	TRUE	FALSE	0.336803	66	0	14	52	T	splice_region_variant	LOW	cyn-16	WBGene00000892	transcript	Y17G7B.9	protein_coding
II	12029156	A	[T]	{A, T}	0.0307692	1	TRUE	FALSE	FALSE	0.0601073	65	0	2	63	T	splice_region_variant&intron_variant	LOW	cyn-16	WBGene00000892	transcript	Y17G7B.9	protein_coding
II	12029822	A	[C]	{C, A}	0.0151515	1	TRUE	FALSE	FALSE	0.0300717	66	0	1	65	C	splice_region_variant&intron_variant	LOW	cyn-16	WBGene00000892	transcript	Y17G7B.9	protein_coding
II	12031020	C	[T]	{C, T}	0.0757576	1	TRUE	FALSE	TRUE	0.141106	66	0	5	61	T	synonymous_variant	LOW	cyn-16	WBGene00000892	transcript	Y17G7B.9	protein_coding
II	12031026	C	[T]	{C, T}	0.0151515	1	TRUE	FALSE	TRUE	0.0300717	66	0	1	65	T	synonymous_variant	LOW	cyn-16	WBGene00000892	transcript	Y17G7B.9	protein_coding
II	12031295	A	[C]	{C, A}	0.393939	1	TRUE	FALSE	FALSE	0.481147	66	0	26	40	C	splice_region_variant&intron_variant	LOW	cyn-16	WBGene00000892	transcript	Y17G7B.9	protein_coding
II	12031382	G	[C]	{C, G}	0.0606061	1	TRUE	FALSE	FALSE	0.114735	66	0	4	62	C	splice_region_variant&synonymous_variant	LOW	cyn-16	WBGene00000892	transcript	Y17G7B.9	protein_coding
II	12031972	C	[T]	{C, T}	0.0151515	1	TRUE	FALSE	TRUE	0.0300717	66	0	1	65	T	synonymous_variant	LOW	cyn-16	WBGene00000892	transcript	Y17G7B.9	protein_coding
II	12033939	C	[G]	{C, G}	0.121212	1	TRUE	FALSE	FALSE	0.214666	66	0	8	58	G	synonymous_variant	LOW	cyn-16	WBGene00000892	transcript	Y17G7B.9	protein_coding
II	12035285	A	[G]	{G, A}	0.0923077	1	TRUE	FALSE	TRUE	0.168873	65	0	6	59	G	synonymous_variant	LOW	cyn-16	WBGene00000892	transcript	Y17G7B.9	protein_coding
II	12036724	T	[C]	{C, T}	0.166667	1	TRUE	FALSE	TRUE	0.279898	66	0	11	55	C	synonymous_variant	LOW	cyn-16	WBGene00000892	transcript	Y17G7B.9	protein_coding
II	12037290	T	[C]	{C, T}	0.893939	1	TRUE	FALSE	TRUE	0.191071	66	0	59	7	C	synonymous_variant	LOW	tpi-1	WBGene00006601	transcript	Y17G7B.7	protein_coding
II	12037464	T	[C]	{C, T}	0.151515	1	TRUE	FALSE	TRUE	0.259079	66	0	10	56	C	synonymous_variant	LOW	tpi-1	WBGene00006601	transcript	Y17G7B.7	protein_coding
II	12037512	G	[T]	{G, T}	0.030303	1	TRUE	FALSE	FALSE	0.0592181	66	0	2	64	T	synonymous_variant	LOW	tpi-1	WBGene00006601	transcript	Y17G7B.7	protein_coding
II	12037518	C	[T]	{C, T}	0.0151515	1	TRUE	FALSE	TRUE	0.0300717	66	0	1	65	T	synonymous_variant	LOW	tpi-1	WBGene00006601	transcript	Y17G7B.7	protein_coding
II	12038599	A	[T]	{A, T}	0.0454545	1	TRUE	FALSE	FALSE	0.0874393	66	0	3	63	T	splice_region_variant&intron_variant	LOW	tpi-1	WBGene00006601	transcript	Y17G7B.7	protein_coding
II	12038854	T	[C]	{C, T}	0.0151515	1	TRUE	FALSE	TRUE	0.0300717	66	0	1	65	C	synonymous_variant	LOW	tpi-1	WBGene00006601	transcript	Y17G7B.7	protein_coding
II	12038875	T	[G]	{G, T}	0.0757576	1	TRUE	FALSE	FALSE	0.141106	66	0	5	61	G	synonymous_variant	LOW	tpi-1	WBGene00006601	transcript	Y17G7B.7	protein_coding
II	12039001	A	[G]	{G, A}	0.166667	1	TRUE	FALSE	TRUE	0.279898	66	0	11	55	G	synonymous_variant	LOW	tpi-1	WBGene00006601	transcript	Y17G7B.7	protein_coding
II	12039115	G	[A]	{G, A}	0.0151515	1	TRUE	FALSE	TRUE	0.0300717	66	0	1	65	A	synonymous_variant	LOW	tpi-1	WBGene00006601	transcript	Y17G7B.7	protein_coding
II	12043058	A	[G]	{G, A}	0.106061	1	TRUE	FALSE	TRUE	0.191071	66	0	7	59	G	splice_region_variant&intron_variant	LOW	ippk-1	WBGene00012466	transcript	Y17G7B.13	protein_coding
II	12043171	G	[A]	{G, A}	0.0151515	1	TRUE	FALSE	TRUE	0.0300717	66	0	1	65	A	splice_region_variant&intron_variant	LOW	ippk-1	WBGene00012466	transcript	Y17G7B.13	protein_coding
II	12044335	C	[T]	{C, T}	0.0151515	1	TRUE	FALSE	TRUE	0.0300717	66	0	1	65	T	synonymous_variant	LOW	ippk-1	WBGene00012466	transcript	Y17G7B.13	protein_coding
II	12045896	C	[T]	{C, T}	0.0151515	1	TRUE	FALSE	TRUE	0.0300717	66	0	1	65	T	synonymous_variant	LOW	ippk-1	WBGene00012466	transcript	Y17G7B.13	protein_coding
II	12046945	A	[G]	{G, A}	0.0757576	1	TRUE	FALSE	TRUE	0.141106	66	0	5	61	G	synonymous_variant	LOW	ippk-1	WBGene00012466	transcript	Y17G7B.13	protein_coding
II	12046993	T	[C]	{C, T}	0.0151515	1	TRUE	FALSE	TRUE	0.0300717	66	0	1	65	C	synonymous_variant	LOW	ippk-1	WBGene00012466	transcript	Y17G7B.13	protein_coding
II	12047219	C	[T]	{C, T}	0.0454545	1	TRUE	FALSE	TRUE	0.0874393	66	0	3	63	T	synonymous_variant	LOW	ippk-1	WBGene00012466	transcript	Y17G7B.13	protein_coding
II	12047239	T	[A]	{A, T}	0.0151515	1	TRUE	FALSE	FALSE	0.0300717	66	0	1	65	A	synonymous_variant	LOW	ippk-1	WBGene00012466	transcript	Y17G7B.13	protein_coding
II	12047251	G	[A]	{G, A}	0.0151515	1	TRUE	FALSE	TRUE	0.0300717	66	0	1	65	A	synonymous_variant	LOW	ippk-1	WBGene00012466	transcript	Y17G7B.13	protein_coding
II	12047257	C	[T]	{C, T}	0.0151515	1	TRUE	FALSE	TRUE	0.0300717	66	0	1	65	T	synonymous_variant	LOW	ippk-1	WBGene00012466	transcript	Y17G7B.13	protein_coding
II	12048229	C	[T]	{C, T}	0.106061	1	TRUE	FALSE	TRUE	0.191071	66	0	7	59	T	synonymous_variant	LOW	ippk-1	WBGene00012466	transcript	Y17G7B.13	protein_coding
II	12048286	A	[G]	{G, A}	0.636364	1	TRUE	FALSE	TRUE	0.466343	66	0	42	24	G	synonymous_variant	LOW	ippk-1	WBGene00012466	transcript	Y17G7B.13	protein_coding
II	12048295	T	[C]	{C, T}	0.560606	1	TRUE	FALSE	TRUE	0.496415	66	0	37	29	C	synonymous_variant	LOW	ippk-1	WBGene00012466	transcript	Y17G7B.13	protein_coding
II	12048310	G	[A]	{G, A}	0.0454545	1	TRUE	FALSE	TRUE	0.0874393	66	0	3	63	A	synonymous_variant	LOW	ippk-1	WBGene00012466	transcript	Y17G7B.13	protein_coding
II	12055568	G	[A]	{G, A}	0.121212	1	TRUE	FALSE	TRUE	0.214666	66	0	8	58	A	synonymous_variant	LOW	Y17G7B.10	WBGene00012463	transcript	Y17G7B.10b.1	protein_coding
II	12055589	C	[T]	{C, T}	0.0909091	1	TRUE	FALSE	TRUE	0.166551	66	0	6	60	T	synonymous_variant	LOW	Y17G7B.10	WBGene00012463	transcript	Y17G7B.10b.1	protein_coding
II	12055655	G	[A]	{G, A}	0.121212	1	TRUE	FALSE	TRUE	0.214666	66	0	8	58	A	synonymous_variant	LOW	Y17G7B.10	WBGene00012463	transcript	Y17G7B.10b.1	protein_coding
II	12055700	G	[T]	{G, T}	0.0151515	1	TRUE	FALSE	FALSE	0.0300717	66	0	1	65	T	synonymous_variant	LOW	Y17G7B.10	WBGene00012463	transcript	Y17G7B.10b.1	protein_coding
II	12056050	C	[T]	{C, T}	0.227273	1	TRUE	FALSE	TRUE	0.353921	66	0	15	51	T	synonymous_variant	LOW	Y17G7B.10	WBGene00012463	transcript	Y17G7B.10b.1	protein_coding
II	12056086	T	[C]	{C, T}	0.0757576	1	TRUE	FALSE	TRUE	0.141106	66	0	5	61	C	synonymous_variant	LOW	Y17G7B.10	WBGene00012463	transcript	Y17G7B.10b.1	protein_coding
II	12058455	T	[G]	{G, T}	0.106061	1	TRUE	FALSE	FALSE	0.191071	66	0	7	59	G	synonymous_variant	LOW	Y17G7B.10	WBGene00012463	transcript	Y17G7B.10b.1	protein_coding
II	12059746	G	[A]	{G, A}	0.107692	1	TRUE	FALSE	TRUE	0.193679	65	0	7	58	A	synonymous_variant	LOW	Y17G7B.10	WBGene00012463	transcript	Y17G7B.10b.1	protein_coding
II	12059752	T	[G]	{G, T}	0.0307692	1	TRUE	FALSE	FALSE	0.0601073	65	0	2	63	G	synonymous_variant	LOW	Y17G7B.10	WBGene00012463	transcript	Y17G7B.10b.1	protein_coding
II	12060229	A	[G]	{G, A}	0.0461538	1	TRUE	FALSE	TRUE	0.0887299	65	0	3	62	G	splice_region_variant	LOW	arrd-7	WBGene00012464	transcript	Y17G7B.11	protein_coding
II	12060562	G	[A]	{G, A}	0.242424	1	TRUE	FALSE	TRUE	0.370113	66	0	16	50	A	synonymous_variant	LOW	arrd-7	WBGene00012464	transcript	Y17G7B.11	protein_coding
II	12060873	C	[G]	{C, G}	0.242424	1	TRUE	FALSE	FALSE	0.370113	66	0	16	50	G	synonymous_variant	LOW	arrd-7	WBGene00012464	transcript	Y17G7B.11	protein_coding
II	12061786	A	[T]	{A, T}	0.0151515	1	TRUE	FALSE	FALSE	0.0300717	66	0	1	65	T	synonymous_variant	LOW	arrd-7	WBGene00012464	transcript	Y17G7B.11	protein_coding
II	12061809	G	[A]	{G, A}	0.212121	1	TRUE	FALSE	TRUE	0.336803	66	0	14	52	A	synonymous_variant	LOW	arrd-7	WBGene00012464	transcript	Y17G7B.11	protein_coding
II	12061828	A	[C]	{C, A}	0.212121	1	TRUE	FALSE	FALSE	0.336803	66	0	14	52	C	synonymous_variant	LOW	arrd-7	WBGene00012464	transcript	Y17G7B.11	protein_coding
II	12061858	A	[T]	{A, T}	0.212121	1	TRUE	FALSE	FALSE	0.336803	66	0	14	52	T	synonymous_variant	LOW	arrd-7	WBGene00012464	transcript	Y17G7B.11	protein_coding
II	12061873	G	[A]	{G, A}	0.212121	1	TRUE	FALSE	TRUE	0.336803	66	0	14	52	A	synonymous_variant	LOW	arrd-7	WBGene00012464	transcript	Y17G7B.11	protein_coding
II	12061929	A	[AG]	{AG, A}	0.0153846	1	FALSE	TRUE	FALSE	0.0305307	65	0	1	64	AG	splice_region_variant&intron_variant	LOW	arrd-7	WBGene00012464	transcript	Y17G7B.11	protein_coding
II	12061936	C	[T]	{C, T}	0.212121	1	TRUE	FALSE	TRUE	0.336803	66	0	14	52	T	splice_region_variant&synonymous_variant	LOW	arrd-7	WBGene00012464	transcript	Y17G7B.11	protein_coding
II	12061942	G	[A]	{G, A}	0.212121	1	TRUE	FALSE	TRUE	0.336803	66	0	14	52	A	synonymous_variant	LOW	arrd-7	WBGene00012464	transcript	Y17G7B.11	protein_coding
II	12061981	T	[C]	{C, T}	0.212121	1	TRUE	FALSE	TRUE	0.336803	66	0	14	52	C	synonymous_variant	LOW	arrd-7	WBGene00012464	transcript	Y17G7B.11	protein_coding
II	12061983	A	[G]	{G, A}	0.212121	1	TRUE	FALSE	TRUE	0.336803	66	0	14	52	G	synonymous_variant	LOW	arrd-7	WBGene00012464	transcript	Y17G7B.11	protein_coding
II	12061999	G	[A]	{G, A}	0.212121	1	TRUE	FALSE	TRUE	0.336803	66	0	14	52	A	synonymous_variant	LOW	arrd-7	WBGene00012464	transcript	Y17G7B.11	protein_coding
II	12062011	T	[C]	{C, T}	0.212121	1	TRUE	FALSE	TRUE	0.336803	66	0	14	52	C	synonymous_variant	LOW	arrd-7	WBGene00012464	transcript	Y17G7B.11	protein_coding
II	12062044	G	[A]	{G, A}	0.0151515	1	TRUE	FALSE	TRUE	0.0300717	66	0	1	65	A	synonymous_variant	LOW	arrd-7	WBGene00012464	transcript	Y17G7B.11	protein_coding
II	12062050	G	[A]	{G, A}	0.212121	1	TRUE	FALSE	TRUE	0.336803	66	0	14	52	A	synonymous_variant	LOW	arrd-7	WBGene00012464	transcript	Y17G7B.11	protein_coding
II	12062053	G	[A]	{G, A}	0.212121	1	TRUE	FALSE	TRUE	0.336803	66	0	14	52	A	synonymous_variant	LOW	arrd-7	WBGene00012464	transcript	Y17G7B.11	protein_coding
II	12062056	A	[G]	{G, A}	0.212121	1	TRUE	FALSE	TRUE	0.336803	66	0	14	52	G	synonymous_variant	LOW	arrd-7	WBGene00012464	transcript	Y17G7B.11	protein_coding
II	12062059	A	[G]	{G, A}	0.212121	1	TRUE	FALSE	TRUE	0.336803	66	0	14	52	G	synonymous_variant	LOW	arrd-7	WBGene00012464	transcript	Y17G7B.11	protein_coding
II	12062074	A	[G]	{G, A}	0.212121	1	TRUE	FALSE	TRUE	0.336803	66	0	14	52	G	synonymous_variant	LOW	arrd-7	WBGene00012464	transcript	Y17G7B.11	protein_coding
II	12062086	T	[G]	{G, T}	0.212121	1	TRUE	FALSE	FALSE	0.336803	66	0	14	52	G	synonymous_variant	LOW	arrd-7	WBGene00012464	transcript	Y17G7B.11	protein_coding
II	12062141	T	[G]	{G, T}	0.212121	1	TRUE	FALSE	FALSE	0.336803	66	0	14	52	G	splice_region_variant&intron_variant	LOW	arrd-7	WBGene00012464	transcript	Y17G7B.11	protein_coding
II	12062146	C	[T]	{C, T}	0.212121	1	TRUE	FALSE	TRUE	0.336803	66	0	14	52	T	splice_region_variant&intron_variant	LOW	arrd-7	WBGene00012464	transcript	Y17G7B.11	protein_coding
II	12062161	C	[A]	{C, A}	0.212121	1	TRUE	FALSE	FALSE	0.336803	66	0	14	52	A	synonymous_variant	LOW	arrd-7	WBGene00012464	transcript	Y17G7B.11	protein_coding
II	12062182	T	[C]	{C, T}	0.212121	1	TRUE	FALSE	TRUE	0.336803	66	0	14	52	C	synonymous_variant	LOW	arrd-7	WBGene00012464	transcript	Y17G7B.11	protein_coding
II	12062185	G	[T]	{G, T}	0.212121	1	TRUE	FALSE	FALSE	0.336803	66	0	14	52	T	synonymous_variant	LOW	arrd-7	WBGene00012464	transcript	Y17G7B.11	protein_coding
II	12062227	G	[A]	{G, A}	0.212121	1	TRUE	FALSE	TRUE	0.336803	66	0	14	52	A	synonymous_variant	LOW	arrd-7	WBGene00012464	transcript	Y17G7B.11	protein_coding
II	12062238	T	[G]	{G, T}	0.212121	1	TRUE	FALSE	FALSE	0.336803	66	0	14	52	G	synonymous_variant	LOW	arrd-7	WBGene00012464	transcript	Y17G7B.11	protein_coding
II	12062261	G	[T, A]	{G, A, T}	0.227273	1	TRUE	FALSE	FALSE	0.353921	66	0	15	51	A	splice_region_variant&intron_variant	LOW	arrd-7	WBGene00012464	transcript	Y17G7B.11	protein_coding
II	12062485	A	[T]	{A, T}	0.212121	1	TRUE	FALSE	FALSE	0.336803	66	0	14	52	T	synonymous_variant	LOW	arrd-7	WBGene00012464	transcript	Y17G7B.11	protein_coding
II	12062494	A	[G]	{G, A}	0.212121	1	TRUE	FALSE	TRUE	0.336803	66	0	14	52	G	synonymous_variant	LOW	arrd-7	WBGene00012464	transcript	Y17G7B.11	protein_coding
II	12062508	G	[A]	{G, A}	0.212121	1	TRUE	FALSE	TRUE	0.336803	66	0	14	52	A	synonymous_variant	LOW	arrd-7	WBGene00012464	transcript	Y17G7B.11	protein_coding
II	12062515	C	[T]	{C, T}	0.227273	1	TRUE	FALSE	TRUE	0.353921	66	0	15	51	T	synonymous_variant	LOW	arrd-7	WBGene00012464	transcript	Y17G7B.11	protein_coding
II	12062545	T	[C]	{C, T}	0.212121	1	TRUE	FALSE	TRUE	0.336803	66	0	14	52	C	synonymous_variant	LOW	arrd-7	WBGene00012464	transcript	Y17G7B.11	protein_coding
II	12062551	T	[C]	{C, T}	0.212121	1	TRUE	FALSE	TRUE	0.336803	66	0	14	52	C	synonymous_variant	LOW	arrd-7	WBGene00012464	transcript	Y17G7B.11	protein_coding
II	12062560	A	[C]	{C, A}	0.212121	1	TRUE	FALSE	FALSE	0.336803	66	0	14	52	C	synonymous_variant	LOW	arrd-7	WBGene00012464	transcript	Y17G7B.11	protein_coding
II	12062566	T	[C]	{C, T}	0.212121	1	TRUE	FALSE	TRUE	0.336803	66	0	14	52	C	synonymous_variant	LOW	arrd-7	WBGene00012464	transcript	Y17G7B.11	protein_coding
II	12062575	G	[A]	{G, A}	0.212121	1	TRUE	FALSE	TRUE	0.336803	66	0	14	52	A	synonymous_variant	LOW	arrd-7	WBGene00012464	transcript	Y17G7B.11	protein_coding
II	12062602	A	[G]	{G, A}	0.212121	1	TRUE	FALSE	TRUE	0.336803	66	0	14	52	G	synonymous_variant	LOW	arrd-7	WBGene00012464	transcript	Y17G7B.11	protein_coding
II	12062611	G	[A]	{G, A}	0.212121	1	TRUE	FALSE	TRUE	0.336803	66	0	14	52	A	synonymous_variant	LOW	arrd-7	WBGene00012464	transcript	Y17G7B.11	protein_coding
II	12062614	G	[A]	{G, A}	0.212121	1	TRUE	FALSE	TRUE	0.336803	66	0	14	52	A	synonymous_variant	LOW	arrd-7	WBGene00012464	transcript	Y17G7B.11	protein_coding
II	12065159	G	[A]	{G, A}	0.0769231	1	TRUE	FALSE	TRUE	0.143113	65	0	5	60	A	synonymous_variant	LOW	arrd-8	WBGene00012467	transcript	Y17G7B.14	protein_coding
II	12065258	A	[G]	{G, A}	0.215385	1	TRUE	FALSE	TRUE	0.340608	65	0	14	51	G	synonymous_variant	LOW	arrd-8	WBGene00012467	transcript	Y17G7B.14	protein_coding
II	12066915	A	[G]	{G, A}	0.0606061	1	TRUE	FALSE	TRUE	0.114735	66	0	4	62	G	synonymous_variant	LOW	arrd-8	WBGene00012467	transcript	Y17G7B.14	protein_coding
II	12066971	CATA	[C]	{C, CATA}	0.0151515	1	FALSE	TRUE	FALSE	0.0300717	66	0	1	65	C	splice_region_variant&intron_variant	LOW	arrd-8	WBGene00012467	transcript	Y17G7B.14	protein_coding
II	12066973	TAA	[T]	{TAA, T}	0.0606061	1	FALSE	TRUE	FALSE	0.114735	66	0	4	62	T	splice_region_variant&intron_variant	LOW	arrd-8	WBGene00012467	transcript	Y17G7B.14	protein_coding
II	12067145	G	[A]	{G, A}	0.212121	1	TRUE	FALSE	TRUE	0.336803	66	0	14	52	A	synonymous_variant	LOW	arrd-8	WBGene00012467	transcript	Y17G7B.14	protein_coding
II	12067367	T	[A]	{A, T}	0.0151515	1	TRUE	FALSE	FALSE	0.0300717	66	0	1	65	A	synonymous_variant	LOW	arrd-8	WBGene00012467	transcript	Y17G7B.14	protein_coding
II	12067391	G	[A]	{G, A}	0.212121	1	TRUE	FALSE	TRUE	0.336803	66	0	14	52	A	synonymous_variant	LOW	arrd-8	WBGene00012467	transcript	Y17G7B.14	protein_coding

## Sheet: Modified
CHROM	POS	REF	ALT	allele_set	aaf	call_rate	is_snp	is_indel	is_transition	nucl_diversity	num_called	num_het	num_hom_alt	num_hom_ref	ANN	Mutation type	Impact	Gene name	WBGene ID	Transcript?	Gene ID	Gene Type
II	11535216	C	[CA]	{C, CA}	0.151515	1	FALSE	TRUE	FALSE	0.259079	66	0	10	56	CA	3_prime_UTR_variant	MODIFIER	Y62F5A.9	WBGene00013387	transcript	Y62F5A.9	protein_coding
II	11535551	C	[T]	{C, T}	0.893939	1	TRUE	FALSE	TRUE	0.191071	66	0	59	7	T	intron_variant	MODIFIER	Y62F5A.9	WBGene00013387	transcript	Y62F5A.9	protein_coding
II	11535652	G	[C]	{C, G}	0.136364	1	TRUE	FALSE	FALSE	0.237335	66	0	9	57	C	intron_variant	MODIFIER	Y62F5A.9	WBGene00013387	transcript	Y62F5A.9	protein_coding
II	11535741	GAGATGACGTGGC	[G]	{G, GAGATGACGTGGC}	0.0151515	1	FALSE	TRUE	FALSE	0.0300717	66	0	1	65	G	intron_variant	MODIFIER	Y62F5A.9	WBGene00013387	transcript	Y62F5A.9	protein_coding
II	11535746	G	[A]	{G, A}	0.0454545	1	TRUE	FALSE	TRUE	0.0874393	66	0	3	63	A	intron_variant	MODIFIER	Y62F5A.9	WBGene00013387	transcript	Y62F5A.9	protein_coding
II	11536211	G	[C]	{C, G}	0.0151515	1	TRUE	FALSE	FALSE	0.0300717	66	0	1	65	C	intron_variant	MODIFIER	Y62F5A.9	WBGene00013387	transcript	Y62F5A.9	protein_coding
II	11536248	A	[AT]	{AT, A}	0.136364	1	FALSE	TRUE	FALSE	0.237335	66	0	9	57	AT	intron_variant	MODIFIER	Y62F5A.9	WBGene00013387	transcript	Y62F5A.9	protein_coding
II	11536319	C	[A]	{C, A}	0.0454545	1	TRUE	FALSE	FALSE	0.0874393	66	0	3	63	A	intron_variant	MODIFIER	Y62F5A.9	WBGene00013387	transcript	Y62F5A.9	protein_coding
II	11536423	G	[A]	{G, A}	0.0169492	1	TRUE	FALSE	TRUE	0.0336086	59	0	1	58	A	intron_variant	MODIFIER	Y62F5A.9	WBGene00013387	transcript	Y62F5A.9	protein_coding
II	11536423	G	[GT]	{G, GT}	0.107692	1	FALSE	TRUE	FALSE	0.193679	65	0	7	58	GT	intron_variant	MODIFIER	Y62F5A.9	WBGene00013387	transcript	Y62F5A.9	protein_coding
II	11536483	G	[GA]	{G, GA}	0.166667	1	FALSE	TRUE	FALSE	0.279898	66	0	11	55	GA	intron_variant	MODIFIER	Y62F5A.9	WBGene00013387	transcript	Y62F5A.9	protein_coding
II	11536545	C	[T]	{C, T}	0.136364	1	TRUE	FALSE	TRUE	0.237335	66	0	9	57	T	intron_variant	MODIFIER	Y62F5A.9	WBGene00013387	transcript	Y62F5A.9	protein_coding
II	11536656	C	[T]	{C, T}	0.0151515	1	TRUE	FALSE	TRUE	0.0300717	66	0	1	65	T	intron_variant	MODIFIER	Y62F5A.9	WBGene00013387	transcript	Y62F5A.9	protein_coding
II	11536678	A	[G]	{G, A}	0.363636	1	TRUE	FALSE	TRUE	0.466343	66	0	24	42	G	intron_variant	MODIFIER	Y62F5A.9	WBGene00013387	transcript	Y62F5A.9	protein_coding
II	11536680	C	[T]	{C, T}	0.363636	1	TRUE	FALSE	TRUE	0.466343	66	0	24	42	T	intron_variant	MODIFIER	Y62F5A.9	WBGene00013387	transcript	Y62F5A.9	protein_coding
II	11536793	A	[T]	{A, T}	0.0151515	1	TRUE	FALSE	FALSE	0.0300717	66	0	1	65	T	intron_variant	MODIFIER	Y62F5A.9	WBGene00013387	transcript	Y62F5A.9	protein_coding
II	11536823	A	[T]	{A, T}	0.0151515	1	TRUE	FALSE	FALSE	0.0300717	66	0	1	65	T	intron_variant	MODIFIER	Y62F5A.9	WBGene00013387	transcript	Y62F5A.9	protein_coding
II	11536855	ATT	[ATTT, A, AT]	{ATT, ATTT, A}	0.121212	1	FALSE	TRUE	FALSE	0.214666	66	0	8	58	A	intron_variant	MODIFIER	Y62F5A.9	WBGene00013387	transcript	Y62F5A.9	protein_coding
II	11536930	A	[C]	{C, A}	0.136364	1	TRUE	FALSE	FALSE	0.237335	66	0	9	57	C	intron_variant	MODIFIER	Y62F5A.9	WBGene00013387	transcript	Y62F5A.9	protein_coding
II	11537058	CA	[C]	{C, CA}	0.0151515	1	FALSE	TRUE	FALSE	0.0300717	66	0	1	65	C	intron_variant	MODIFIER	Y62F5A.9	WBGene00013387	transcript	Y62F5A.9	protein_coding
II	11537135	C	[T]	{C, T}	0.0151515	1	TRUE	FALSE	TRUE	0.0300717	66	0	1	65	T	intron_variant	MODIFIER	Y62F5A.9	WBGene00013387	transcript	Y62F5A.9	protein_coding
II	11537165	T	[G]	{G, T}	0.151515	1	TRUE	FALSE	FALSE	0.259079	66	0	10	56	G	intron_variant	MODIFIER	Y62F5A.9	WBGene00013387	transcript	Y62F5A.9	protein_coding
II	11537299	T	[C]	{C, T}	0.0151515	1	TRUE	FALSE	TRUE	0.0300717	66	0	1	65	C	intron_variant	MODIFIER	Y62F5A.9	WBGene00013387	transcript	Y62F5A.9	protein_coding
II	11537442	C	[T]	{C, T}	0.0151515	1	TRUE	FALSE	TRUE	0.0300717	66	0	1	65	T	intron_variant	MODIFIER	Y62F5A.9	WBGene00013387	transcript	Y62F5A.9	protein_coding
II	11537604	T	[A]	{A, T}	0.166667	1	TRUE	FALSE	FALSE	0.279898	66	0	11	55	A	intron_variant	MODIFIER	Y62F5A.9	WBGene00013387	transcript	Y62F5A.9	protein_coding
II	11537830	C	[T]	{C, T}	0.0151515	1	TRUE	FALSE	TRUE	0.0300717	66	0	1	65	T	intron_variant	MODIFIER	Y62F5A.9	WBGene00013387	transcript	Y62F5A.9	protein_coding
II	11537835	C	[T]	{C, T}	0.0454545	1	TRUE	FALSE	TRUE	0.0874393	66	0	3	63	T	intron_variant	MODIFIER	Y62F5A.9	WBGene00013387	transcript	Y62F5A.9	protein_coding
II	11537884	T	[G]	{G, T}	0.0151515	1	TRUE	FALSE	FALSE	0.0300717	66	0	1	65	G	intron_variant	MODIFIER	Y62F5A.9	WBGene00013387	transcript	Y62F5A.9	protein_coding
II	11537953	G	[GT]	{G, GT}	0.0151515	1	FALSE	TRUE	FALSE	0.0300717	66	0	1	65	GT	intron_variant	MODIFIER	Y62F5A.9	WBGene00013387	transcript	Y62F5A.9	protein_coding
II	11538039	G	[GTTTCGATTTC]	{G, GTTTCGATTTC}	0.0151515	1	FALSE	TRUE	FALSE	0.0300717	66	0	1	65	GTTTCGATTTC	intron_variant	MODIFIER	Y62F5A.9	WBGene00013387	transcript	Y62F5A.9	protein_coding
II	11538044	T	[C]	{C, T}	0.0151515	1	TRUE	FALSE	TRUE	0.0300717	66	0	1	65	C	intron_variant	MODIFIER	Y62F5A.9	WBGene00013387	transcript	Y62F5A.9	protein_coding
II	11538189	T	[C]	{C, T}	0.893939	1	TRUE	FALSE	TRUE	0.191071	66	0	59	7	C	intron_variant	MODIFIER	Y62F5A.9	WBGene00013387	transcript	Y62F5A.9	protein_coding
II	11538205	T	[C]	{C, T}	0.0151515	1	TRUE	FALSE	TRUE	0.0300717	66	0	1	65	C	intron_variant	MODIFIER	Y62F5A.9	WBGene00013387	transcript	Y62F5A.9	protein_coding
II	11538581	T	[TAGAATAGAATAAGAG]	{TAGAATAGAATAAGAG, T}	0.0151515	1	FALSE	TRUE	FALSE	0.0300717	66	0	1	65	TAGAATAGAATAAGAG	intron_variant	MODIFIER	Y62F5A.9	WBGene00013387	transcript	Y62F5A.9	protein_coding
II	11538594	A	[T]	{A, T}	0.212121	1	TRUE	FALSE	FALSE	0.336803	66	0	14	52	T	intron_variant	MODIFIER	Y62F5A.9	WBGene00013387	transcript	Y62F5A.9	protein_coding
II	11538607	CA	[CAA, C, CAAA]	{C, CAA, CA}	0.0454545	1	FALSE	TRUE	FALSE	0.0874393	66	0	3	63	C	intron_variant	MODIFIER	Y62F5A.9	WBGene00013387	transcript	Y62F5A.9	protein_coding
II	11538928	T	[G]	{G, T}	0.166667	1	TRUE	FALSE	FALSE	0.279898	66	0	11	55	G	3_prime_UTR_variant	MODIFIER	F54D5.12	WBGene00010055	transcript	F54D5.12	protein_coding
II	11538961	T	[C]	{C, T}	0.0151515	1	TRUE	FALSE	TRUE	0.0300717	66	0	1	65	C	3_prime_UTR_variant	MODIFIER	F54D5.12	WBGene00010055	transcript	F54D5.12	protein_coding
II	11539185	G	[A]	{G, A}	0.0151515	1	TRUE	FALSE	TRUE	0.0300717	66	0	1	65	A	intron_variant	MODIFIER	F54D5.12	WBGene00010055	transcript	F54D5.12	protein_coding
II	11539754	A	[T]	{A, T}	0.0151515	1	TRUE	FALSE	FALSE	0.0300717	66	0	1	65	T	intron_variant	MODIFIER	F54D5.12	WBGene00010055	transcript	F54D5.12	protein_coding
II	11539775	C	[T]	{C, T}	0.0606061	1	TRUE	FALSE	TRUE	0.114735	66	0	4	62	T	intron_variant	MODIFIER	F54D5.12	WBGene00010055	transcript	F54D5.12	protein_coding
II	11540373	T	[G]	{G, T}	0.0151515	1	TRUE	FALSE	FALSE	0.0300717	66	0	1	65	G	intron_variant	MODIFIER	F54D5.12	WBGene00010055	transcript	F54D5.12	protein_coding
II	11541156	A	[G]	{G, A}	0.0454545	1	TRUE	FALSE	TRUE	0.0874393	66	0	3	63	G	intron_variant	MODIFIER	F54D5.11	WBGene00010054	transcript	F54D5.11.1	protein_coding
II	11541168	C	[A]	{C, A}	0.621212	1	TRUE	FALSE	FALSE	0.474208	66	0	41	25	A	intron_variant	MODIFIER	F54D5.11	WBGene00010054	transcript	F54D5.11.1	protein_coding
II	11541187	T	[G]	{G, T}	0.030303	1	TRUE	FALSE	FALSE	0.0592181	66	0	2	64	G	intron_variant	MODIFIER	F54D5.11	WBGene00010054	transcript	F54D5.11.1	protein_coding
II	11541307	T	[A]	{A, T}	0.184615	1	TRUE	FALSE	FALSE	0.303399	65	0	12	53	A	intron_variant	MODIFIER	F54D5.11	WBGene00010054	transcript	F54D5.11.1	protein_coding
II	11541392	AC	[A]	{AC, A}	0.0153846	1	FALSE	TRUE	FALSE	0.0305307	65	0	1	64	A	intron_variant	MODIFIER	F54D5.11	WBGene00010054	transcript	F54D5.11.1	protein_coding
II	11541394	C	[CT]	{C, CT}	0.0153846	1	FALSE	TRUE	FALSE	0.0305307	65	0	1	64	CT	intron_variant	MODIFIER	F54D5.11	WBGene00010054	transcript	F54D5.11.1	protein_coding
II	11541457	A	[G]	{G, A}	0.0153846	1	TRUE	FALSE	TRUE	0.0305307	65	0	1	64	G	intron_variant	MODIFIER	F54D5.11	WBGene00010054	transcript	F54D5.11.1	protein_coding
II	11541466	C	[T]	{C, T}	0.166667	1	TRUE	FALSE	TRUE	0.279898	66	0	11	55	T	intron_variant	MODIFIER	F54D5.11	WBGene00010054	transcript	F54D5.11.1	protein_coding
II	11541532	T	[A]	{A, T}	0.151515	1	TRUE	FALSE	FALSE	0.259079	66	0	10	56	A	intron_variant	MODIFIER	F54D5.11	WBGene00010054	transcript	F54D5.11.1	protein_coding
II	11541534	T	[A]	{A, T}	0.151515	1	TRUE	FALSE	FALSE	0.259079	66	0	10	56	A	intron_variant	MODIFIER	F54D5.11	WBGene00010054	transcript	F54D5.11.1	protein_coding
II	11541537	T	[A]	{A, T}	0.0606061	1	TRUE	FALSE	FALSE	0.114735	66	0	4	62	A	intron_variant	MODIFIER	F54D5.11	WBGene00010054	transcript	F54D5.11.1	protein_coding
II	11541539	T	[A]	{A, T}	0.151515	1	TRUE	FALSE	FALSE	0.259079	66	0	10	56	A	intron_variant	MODIFIER	F54D5.11	WBGene00010054	transcript	F54D5.11.1	protein_coding
II	11541543	T	[A]	{A, T}	0.151515	1	TRUE	FALSE	FALSE	0.259079	66	0	10	56	A	intron_variant	MODIFIER	F54D5.11	WBGene00010054	transcript	F54D5.11.1	protein_coding
II	11541546	T	[G]	{G, T}	0.151515	1	TRUE	FALSE	FALSE	0.259079	66	0	10	56	G	intron_variant	MODIFIER	F54D5.11	WBGene00010054	transcript	F54D5.11.1	protein_coding
II	11541549	A	[G]	{G, A}	0.0151515	1	TRUE	FALSE	TRUE	0.0300717	66	0	1	65	G	intron_variant	MODIFIER	F54D5.11	WBGene00010054	transcript	F54D5.11.1	protein_coding
II	11541611	CA	[CAA, C, CAAA]	{C, CAA, CA}	0.421875	1	FALSE	TRUE	FALSE	0.491634	64	0	27	37	C	intron_variant	MODIFIER	F54D5.11	WBGene00010054	transcript	F54D5.11.1	protein_coding
II	11541639	G	[A]	{G, A}	0.0151515	1	TRUE	FALSE	TRUE	0.0300717	66	0	1	65	A	intron_variant	MODIFIER	F54D5.11	WBGene00010054	transcript	F54D5.11.1	protein_coding
II	11541677	T	[A]	{A, T}	0.0151515	1	TRUE	FALSE	FALSE	0.0300717	66	0	1	65	A	intron_variant	MODIFIER	F54D5.11	WBGene00010054	transcript	F54D5.11.1	protein_coding
II	11541765	T	[C]	{C, T}	0.0151515	1	TRUE	FALSE	TRUE	0.0300717	66	0	1	65	C	intron_variant	MODIFIER	F54D5.11	WBGene00010054	transcript	F54D5.11.1	protein_coding
II	11542387	AT	[A]	{AT, A}	0.0151515	1	FALSE	TRUE	FALSE	0.0300717	66	0	1	65	A	intron_variant	MODIFIER	F54D5.11	WBGene00010054	transcript	F54D5.11.1	protein_coding
II	11542549	C	[G]	{C, G}	0.0151515	1	TRUE	FALSE	FALSE	0.0300717	66	0	1	65	G	5_prime_UTR_variant	MODIFIER	F54D5.11	WBGene00010054	transcript	F54D5.11.1	protein_coding
II	11542550	G	[A]	{G, A}	0.0151515	1	TRUE	FALSE	TRUE	0.0300717	66	0	1	65	A	5_prime_UTR_variant	MODIFIER	F54D5.11	WBGene00010054	transcript	F54D5.11.1	protein_coding
II	11542735	TA	[T]	{TA, T}	0.0151515	1	FALSE	TRUE	FALSE	0.0300717	66	0	1	65	T	3_prime_UTR_variant	MODIFIER	F54D5.9	WBGene00010053	transcript	F54D5.9	protein_coding
II	11542740	G	[C]	{C, G}	0.0454545	1	TRUE	FALSE	FALSE	0.0874393	66	0	3	63	C	3_prime_UTR_variant	MODIFIER	F54D5.9	WBGene00010053	transcript	F54D5.9	protein_coding
II	11543422	A	[T]	{A, T}	0.0151515	1	TRUE	FALSE	FALSE	0.0300717	66	0	1	65	T	intron_variant	MODIFIER	F54D5.9	WBGene00010053	transcript	F54D5.9	protein_coding
II	11543423	A	[G]	{G, A}	0.0151515	1	TRUE	FALSE	TRUE	0.0300717	66	0	1	65	G	intron_variant	MODIFIER	F54D5.9	WBGene00010053	transcript	F54D5.9	protein_coding
II	11543430	TAAA	[TA, TAA, T]	{TAA, TAAA, TA, T}	0.454545	1	FALSE	TRUE	FALSE	0.499653	66	0	30	36	T	intron_variant	MODIFIER	F54D5.9	WBGene00010053	transcript	F54D5.9	protein_coding
II	11543431	A	[T]	{A, T}	0.301887	1	TRUE	FALSE	FALSE	0.425517	53	0	16	37	T	intron_variant	MODIFIER	F54D5.9	WBGene00010053	transcript	F54D5.9	protein_coding
II	11543432	A	[T]	{A, T}	0.0555556	1	TRUE	FALSE	FALSE	0.105919	54	0	3	51	T	intron_variant	MODIFIER	F54D5.9	WBGene00010053	transcript	F54D5.9	protein_coding
II	11543433	A	[T]	{A, T}	0.0555556	1	TRUE	FALSE	FALSE	0.105919	54	0	3	51	T	intron_variant	MODIFIER	F54D5.9	WBGene00010053	transcript	F54D5.9	protein_coding
II	11544809	C	[T]	{C, T}	0.348485	1	TRUE	FALSE	TRUE	0.457553	66	0	23	43	T	5_prime_UTR_variant	MODIFIER	F54D5.9	WBGene00010053	transcript	F54D5.9	protein_coding
II	11545551	ACT	[A]	{ACT, A}	0.0909091	1	FALSE	TRUE	FALSE	0.166551	66	0	6	60	A	non_coding_transcript_exon_variant	MODIFIER	F54D5.18	WBGene00195341	transcript	F54D5.18	lincRNA
II	11545562	C	[T]	{C, T}	0.0151515	1	TRUE	FALSE	TRUE	0.0300717	66	0	1	65	T	non_coding_transcript_exon_variant	MODIFIER	F54D5.18	WBGene00195341	transcript	F54D5.18	lincRNA
II	11545616	A	[T]	{A, T}	0.0151515	1	TRUE	FALSE	FALSE	0.0300717	66	0	1	65	T	5_prime_UTR_variant	MODIFIER	dnj-13	WBGene00001031	transcript	F54D5.8.1	protein_coding
II	11545861	A	[G, T]	{G, A, T}	0.106061	1	TRUE	FALSE	FALSE	0.191071	66	0	7	59	G	intron_variant	MODIFIER	dnj-13	WBGene00001031	transcript	F54D5.8.1	protein_coding
II	11545880	T	[A]	{A, T}	0.030303	1	TRUE	FALSE	FALSE	0.0592181	66	0	2	64	A	intron_variant	MODIFIER	dnj-13	WBGene00001031	transcript	F54D5.8.1	protein_coding
II	11546020	T	[C]	{C, T}	0.0909091	1	TRUE	FALSE	TRUE	0.166551	66	0	6	60	C	intron_variant	MODIFIER	dnj-13	WBGene00001031	transcript	F54D5.8.1	protein_coding
II	11546040	AT	[A]	{AT, A}	0.0757576	1	FALSE	TRUE	FALSE	0.141106	66	0	5	61	A	intron_variant	MODIFIER	dnj-13	WBGene00001031	transcript	F54D5.8.1	protein_coding
II	11546042	T	[A]	{A, T}	0.030303	1	TRUE	FALSE	FALSE	0.0592181	66	0	2	64	A	intron_variant	MODIFIER	dnj-13	WBGene00001031	transcript	F54D5.8.1	protein_coding
II	11546975	C	[G]	{C, G}	0.0151515	1	TRUE	FALSE	FALSE	0.0300717	66	0	1	65	G	3_prime_UTR_variant	MODIFIER	dnj-13	WBGene00001031	transcript	F54D5.8.1	protein_coding
II	11547133	T	[G]	{G, T}	0.0151515	1	TRUE	FALSE	FALSE	0.0300717	66	0	1	65	G	3_prime_UTR_variant	MODIFIER	dnj-13	WBGene00001031	transcript	F54D5.8.1	protein_coding
II	11547152	T	[C]	{C, T}	0.151515	1	TRUE	FALSE	TRUE	0.259079	66	0	10	56	C	3_prime_UTR_variant	MODIFIER	dnj-13	WBGene00001031	transcript	F54D5.8.1	protein_coding
II	11547197	T	[A]	{A, T}	0.0757576	1	TRUE	FALSE	FALSE	0.141106	66	0	5	61	A	3_prime_UTR_variant	MODIFIER	dnj-13	WBGene00001031	transcript	F54D5.8.1	protein_coding
II	11547212	T	[TA]	{TA, T}	0.0757576	1	FALSE	TRUE	FALSE	0.141106	66	0	5	61	TA	3_prime_UTR_variant	MODIFIER	dnj-13	WBGene00001031	transcript	F54D5.8.1	protein_coding
II	11547320	T	[C]	{C, T}	0.030303	1	TRUE	FALSE	TRUE	0.0592181	66	0	2	64	C	3_prime_UTR_variant	MODIFIER	dnj-13	WBGene00001031	transcript	F54D5.8.1	protein_coding
II	11547642	T	[TA, TAAAAAACA]	{TAAAAAACA, TA, T}	0.0757576	1	FALSE	TRUE	FALSE	0.141106	66	0	5	61	TA	intron_variant	MODIFIER	F54D5.7	WBGene00010052	transcript	F54D5.7.1	protein_coding
II	11549191	TCTTTTTTTTC	[T]	{TCTTTTTTTTC, T}	0.015873	1	FALSE	TRUE	FALSE	0.0314921	63	0	1	62	T	3_prime_UTR_variant	MODIFIER	F54D5.7	WBGene00010052	transcript	F54D5.7.1	protein_coding
II	11549198	TTTCC	[T]	{TTTCC, T}	0.147059	1	FALSE	TRUE	FALSE	0.253349	51	1	7	43	T	3_prime_UTR_variant	MODIFIER	F54D5.7	WBGene00010052	transcript	F54D5.7.1	protein_coding
II	11549215	T	[A]	{A, T}	0.0454545	1	TRUE	FALSE	FALSE	0.0874393	66	0	3	63	A	3_prime_UTR_variant	MODIFIER	F54D5.7	WBGene00010052	transcript	F54D5.7.1	protein_coding
II	11556051	G	[T]	{G, T}	0.0454545	1	TRUE	FALSE	FALSE	0.0874393	66	0	3	63	T	intron_variant	MODIFIER	WBGene00271798	WBGene00271798	transcript	F54D5.24	protein_coding
II	11556142	C	[T]	{C, T}	0.166667	1	TRUE	FALSE	TRUE	0.279898	66	0	11	55	T	intron_variant	MODIFIER	WBGene00271798	WBGene00271798	transcript	F54D5.24	protein_coding
II	11556172	G	[A]	{G, A}	0.180328	1	TRUE	FALSE	TRUE	0.298063	61	0	11	50	A	intron_variant	MODIFIER	WBGene00271798	WBGene00271798	transcript	F54D5.24	protein_coding
II	11556172	GC	[G]	{G, GC}	0.0909091	1	FALSE	TRUE	FALSE	0.166806	55	0	5	50	G	intron_variant	MODIFIER	WBGene00271798	WBGene00271798	transcript	F54D5.24	protein_coding
II	11556225	G	[A]	{G, A}	0.136364	1	TRUE	FALSE	TRUE	0.237335	66	0	9	57	A	intron_variant	MODIFIER	WBGene00271798	WBGene00271798	transcript	F54D5.24	protein_coding
II	11556384	G	[A]	{G, A}	0.0606061	1	TRUE	FALSE	TRUE	0.114735	66	0	4	62	A	intron_variant	MODIFIER	WBGene00271798	WBGene00271798	transcript	F54D5.24	protein_coding
II	11556434	T	[C]	{C, T}	0.166667	1	TRUE	FALSE	TRUE	0.279898	66	0	11	55	C	intron_variant	MODIFIER	WBGene00271798	WBGene00271798	transcript	F54D5.24	protein_coding
II	11556459	G	[A]	{G, A}	0.893939	1	TRUE	FALSE	TRUE	0.191071	66	0	59	7	A	intron_variant	MODIFIER	WBGene00271798	WBGene00271798	transcript	F54D5.24	protein_coding
II	11556547	G	[A]	{G, A}	0.0545455	1	TRUE	FALSE	TRUE	0.104087	55	0	3	52	A	intron_variant	MODIFIER	WBGene00271798	WBGene00271798	transcript	F54D5.24	protein_coding
II	11556569	C	[G]	{C, G}	0.166667	1	TRUE	FALSE	FALSE	0.279898	66	0	11	55	G	intron_variant	MODIFIER	WBGene00271798	WBGene00271798	transcript	F54D5.24	protein_coding
II	11556587	TGC	[T]	{TGC, T}	0.0151515	1	FALSE	TRUE	FALSE	0.0300717	66	0	1	65	T	intron_variant	MODIFIER	WBGene00271798	WBGene00271798	transcript	F54D5.24	protein_coding
II	11556606	T	[TCGCGGC]	{TCGCGGC, T}	0.0757576	1	FALSE	TRUE	FALSE	0.141106	66	0	5	61	TCGCGGC	intron_variant	MODIFIER	WBGene00271798	WBGene00271798	transcript	F54D5.24	protein_coding
II	11556617	G	[GCCGCGT, GCCGCGA]	{GCCGCGA, G}	0.0151515	1	FALSE	TRUE	FALSE	0.0300717	66	0	1	65	GCCGCGA	intron_variant	MODIFIER	WBGene00271798	WBGene00271798	transcript	F54D5.24	protein_coding
II	11556619	C	[CGCGGCA]	{C, CGCGGCA}	0.0151515	1	FALSE	TRUE	FALSE	0.0300717	66	0	1	65	CGCGGCA	intron_variant	MODIFIER	WBGene00271798	WBGene00271798	transcript	F54D5.24	protein_coding
II	11556652	TG	[T]	{TG, T}	0.0151515	1	FALSE	TRUE	FALSE	0.0300717	66	0	1	65	T	intron_variant	MODIFIER	WBGene00271798	WBGene00271798	transcript	F54D5.24	protein_coding
II	11556653	G	[T]	{G, T}	0.0757576	1	TRUE	FALSE	FALSE	0.141106	66	0	5	61	T	intron_variant	MODIFIER	WBGene00271798	WBGene00271798	transcript	F54D5.24	protein_coding
II	11556664	G	[GT]	{G, GT}	0.0151515	1	FALSE	TRUE	FALSE	0.0300717	66	0	1	65	GT	intron_variant	MODIFIER	WBGene00271798	WBGene00271798	transcript	F54D5.24	protein_coding
II	11556739	G	[T]	{G, T}	0.030303	1	TRUE	FALSE	FALSE	0.0592181	66	0	2	64	T	5_prime_UTR_variant	MODIFIER	F54D5.17	WBGene00195146	transcript	F54D5.17	protein_coding
II	11556783	A	[C]	{C, A}	0.0454545	1	TRUE	FALSE	FALSE	0.0874393	66	0	3	63	C	5_prime_UTR_variant	MODIFIER	F54D5.17	WBGene00195146	transcript	F54D5.17	protein_coding
II	11556865	T	[G]	{G, T}	0.0151515	1	TRUE	FALSE	FALSE	0.0300717	66	0	1	65	G	intron_variant	MODIFIER	WBGene00271798	WBGene00271798	transcript	F54D5.24	protein_coding
II	11557350	CCGCGCGCCCGGTGCGAAACGTG	[C]	{C, CCGCGCGCCCGGTGCGAAACGTG}	0.0606061	1	FALSE	TRUE	FALSE	0.114735	66	4	2	60	C	intron_variant	MODIFIER	WBGene00271798	WBGene00271798	transcript	F54D5.24	protein_coding
II	11557383	G	[A]	{G, A}	0.0151515	1	TRUE	FALSE	TRUE	0.0300717	66	0	1	65	A	intron_variant	MODIFIER	WBGene00271798	WBGene00271798	transcript	F54D5.24	protein_coding
II	11557468	C	[A]	{C, A}	0.166667	1	TRUE	FALSE	FALSE	0.279898	66	0	11	55	A	intron_variant	MODIFIER	WBGene00271798	WBGene00271798	transcript	F54D5.24	protein_coding
II	11557591	T	[A]	{A, T}	0.0151515	1	TRUE	FALSE	FALSE	0.0300717	66	0	1	65	A	intron_variant	MODIFIER	WBGene00271798	WBGene00271798	transcript	F54D5.24	protein_coding
II	11557616	T	[C]	{C, T}	0.0151515	1	TRUE	FALSE	TRUE	0.0300717	66	0	1	65	C	intron_variant	MODIFIER	WBGene00271798	WBGene00271798	transcript	F54D5.24	protein_coding
II	11557624	A	[G]	{G, A}	0.166667	1	TRUE	FALSE	TRUE	0.279898	66	0	11	55	G	intron_variant	MODIFIER	WBGene00271798	WBGene00271798	transcript	F54D5.24	protein_coding
II	11557684	G	[A]	{G, A}	0.0757576	1	TRUE	FALSE	TRUE	0.141106	66	0	5	61	A	intron_variant	MODIFIER	WBGene00271798	WBGene00271798	transcript	F54D5.24	protein_coding
II	11557833	T	[C]	{C, T}	0.0151515	1	TRUE	FALSE	TRUE	0.0300717	66	0	1	65	C	intron_variant	MODIFIER	WBGene00271798	WBGene00271798	transcript	F54D5.24	protein_coding
II	11557925	T	[A]	{A, T}	0.0151515	1	TRUE	FALSE	FALSE	0.0300717	66	0	1	65	A	intron_variant	MODIFIER	WBGene00271798	WBGene00271798	transcript	F54D5.24	protein_coding
II	11557936	A	[T]	{A, T}	0.0151515	1	TRUE	FALSE	FALSE	0.0300717	66	0	1	65	T	intron_variant	MODIFIER	WBGene00271798	WBGene00271798	transcript	F54D5.24	protein_coding
II	11557948	T	[C]	{C, T}	0.0151515	1	TRUE	FALSE	TRUE	0.0300717	66	0	1	65	C	intron_variant	MODIFIER	WBGene00271798	WBGene00271798	transcript	F54D5.24	protein_coding
II	11558377	T	[C]	{C, T}	0.166667	1	TRUE	FALSE	TRUE	0.279898	66	0	11	55	C	3_prime_UTR_variant	MODIFIER	WBGene00271798	WBGene00271798	transcript	F54D5.24	protein_coding
II	11558418	A	[G]	{G, A}	0.166667	1	TRUE	FALSE	TRUE	0.279898	66	0	11	55	G	3_prime_UTR_variant	MODIFIER	WBGene00271798	WBGene00271798	transcript	F54D5.24	protein_coding
II	11558530	G	[C]	{C, G}	0.242424	1	TRUE	FALSE	FALSE	0.370113	66	0	16	50	C	3_prime_UTR_variant	MODIFIER	WBGene00271798	WBGene00271798	transcript	F54D5.24	protein_coding
II	11558543	A	[T]	{A, T}	0.0151515	1	TRUE	FALSE	FALSE	0.0300717	66	0	1	65	T	3_prime_UTR_variant	MODIFIER	WBGene00271798	WBGene00271798	transcript	F54D5.24	protein_coding
II	11558768	A	[T]	{A, T}	0.166667	1	TRUE	FALSE	FALSE	0.279898	66	0	11	55	T	3_prime_UTR_variant	MODIFIER	WBGene00271798	WBGene00271798	transcript	F54D5.24	protein_coding
II	11559265	A	[C]	{C, A}	0.0454545	1	TRUE	FALSE	FALSE	0.0874393	66	0	3	63	C	intron_variant	MODIFIER	F54D5.15	WBGene00010057	transcript	F54D5.15a	protein_coding
II	11559279	AAACGTG	[A]	{AAACGTG, A}	0.0151515	1	FALSE	TRUE	FALSE	0.0300717	66	0	1	65	A	intron_variant	MODIFIER	F54D5.15	WBGene00010057	transcript	F54D5.15a	protein_coding
II	11559323	GAGTGCATAGAGT	[G]	{G, GAGTGCATAGAGT}	0.0151515	1	FALSE	TRUE	FALSE	0.0300717	66	0	1	65	G	intron_variant	MODIFIER	F54D5.15	WBGene00010057	transcript	F54D5.15a	protein_coding
II	11559324	AGTGCATAGAGTT	[A]	{AGTGCATAGAGTT, A}	0.0530303	1	FALSE	TRUE	FALSE	0.101203	66	3	2	61	A	intron_variant	MODIFIER	F54D5.15	WBGene00010057	transcript	F54D5.15a	protein_coding
II	11559334	G	[A]	{G, A}	0.015625	1	TRUE	FALSE	TRUE	0.0310039	64	0	1	63	A	intron_variant	MODIFIER	F54D5.15	WBGene00010057	transcript	F54D5.15a	protein_coding
II	11559538	CA	[C, CAA]	{C, CAA, CA}	0.181818	1	FALSE	TRUE	FALSE	0.299792	66	0	12	54	C	intron_variant	MODIFIER	F54D5.15	WBGene00010057	transcript	F54D5.15a	protein_coding
II	11559622	C	[A]	{C, A}	0.0757576	1	TRUE	FALSE	FALSE	0.141106	66	0	5	61	A	intron_variant	MODIFIER	F54D5.15	WBGene00010057	transcript	F54D5.15a	protein_coding
II	11559701	A	[G]	{G, A}	0.0151515	1	TRUE	FALSE	TRUE	0.0300717	66	0	1	65	G	intron_variant	MODIFIER	F54D5.15	WBGene00010057	transcript	F54D5.15a	protein_coding
II	11559715	C	[T]	{C, T}	0.166667	1	TRUE	FALSE	TRUE	0.279898	66	0	11	55	T	intron_variant	MODIFIER	F54D5.15	WBGene00010057	transcript	F54D5.15a	protein_coding
II	11559719	TA	[T]	{TA, T}	0.166667	1	FALSE	TRUE	FALSE	0.279898	66	0	11	55	T	intron_variant	MODIFIER	F54D5.15	WBGene00010057	transcript	F54D5.15a	protein_coding
II	11559921	C	[T]	{C, T}	0.0454545	1	TRUE	FALSE	TRUE	0.0874393	66	0	3	63	T	intron_variant	MODIFIER	F54D5.15	WBGene00010057	transcript	F54D5.15a	protein_coding
II	11560011	C	[T]	{C, T}	0.0151515	1	TRUE	FALSE	TRUE	0.0300717	66	0	1	65	T	intron_variant	MODIFIER	F54D5.15	WBGene00010057	transcript	F54D5.15a	protein_coding
II	11560074	T	[G]	{G, T}	0.0151515	1	TRUE	FALSE	FALSE	0.0300717	66	0	1	65	G	intron_variant	MODIFIER	F54D5.15	WBGene00010057	transcript	F54D5.15a	protein_coding
II	11560075	C	[T]	{C, T}	0.0909091	1	TRUE	FALSE	TRUE	0.166551	66	0	6	60	T	intron_variant	MODIFIER	F54D5.15	WBGene00010057	transcript	F54D5.15a	protein_coding
II	11560077	C	[CT]	{C, CT}	0.0757576	1	FALSE	TRUE	FALSE	0.141106	66	0	5	61	CT	intron_variant	MODIFIER	F54D5.15	WBGene00010057	transcript	F54D5.15a	protein_coding
II	11560890	T	[A]	{A, T}	0.0151515	1	TRUE	FALSE	FALSE	0.0300717	66	0	1	65	A	intron_variant	MODIFIER	F54D5.15	WBGene00010057	transcript	F54D5.15a	protein_coding
II	11561322	TTCGA	[T]	{TTCGA, T}	0.0151515	1	FALSE	TRUE	FALSE	0.0300717	66	0	1	65	T	intron_variant	MODIFIER	F54D5.15	WBGene00010057	transcript	F54D5.15a	protein_coding
II	11561323	TCGAA	[T]	{TCGAA, T}	0.166667	1	FALSE	TRUE	FALSE	0.279898	66	0	11	55	T	intron_variant	MODIFIER	F54D5.15	WBGene00010057	transcript	F54D5.15a	protein_coding
II	11561421	T	[C]	{C, T}	0.166667	1	TRUE	FALSE	TRUE	0.279898	66	0	11	55	C	intron_variant	MODIFIER	F54D5.15	WBGene00010057	transcript	F54D5.15a	protein_coding
II	11561560	C	[T]	{C, T}	0.136364	1	TRUE	FALSE	TRUE	0.237335	66	0	9	57	T	intron_variant	MODIFIER	F54D5.15	WBGene00010057	transcript	F54D5.15a	protein_coding
II	11561570	T	[C]	{C, T}	0.0151515	1	TRUE	FALSE	TRUE	0.0300717	66	0	1	65	C	intron_variant	MODIFIER	F54D5.15	WBGene00010057	transcript	F54D5.15a	protein_coding
II	11561669	A	[T]	{A, T}	0.0151515	1	TRUE	FALSE	FALSE	0.0300717	66	0	1	65	T	intron_variant	MODIFIER	F54D5.15	WBGene00010057	transcript	F54D5.15a	protein_coding
II	11561700	TA	[T]	{TA, T}	0.030303	1	FALSE	TRUE	FALSE	0.0592181	66	0	2	64	T	intron_variant	MODIFIER	F54D5.15	WBGene00010057	transcript	F54D5.15a	protein_coding
II	11561701	A	[T]	{A, T}	0.0307692	1	TRUE	FALSE	FALSE	0.0601073	65	0	2	63	T	intron_variant	MODIFIER	F54D5.15	WBGene00010057	transcript	F54D5.15a	protein_coding
II	11561702	A	[T]	{A, T}	0.0153846	1	TRUE	FALSE	FALSE	0.0305307	65	0	1	64	T	intron_variant	MODIFIER	F54D5.15	WBGene00010057	transcript	F54D5.15a	protein_coding
II	11561703	A	[T]	{A, T}	0.0153846	1	TRUE	FALSE	FALSE	0.0305307	65	0	1	64	T	intron_variant	MODIFIER	F54D5.15	WBGene00010057	transcript	F54D5.15a	protein_coding
II	11561714	G	[A]	{G, A}	0.0151515	1	TRUE	FALSE	TRUE	0.0300717	66	0	1	65	A	intron_variant	MODIFIER	F54D5.15	WBGene00010057	transcript	F54D5.15a	protein_coding
II	11561815	C	[T]	{C, T}	0.0151515	1	TRUE	FALSE	TRUE	0.0300717	66	0	1	65	T	intron_variant	MODIFIER	F54D5.15	WBGene00010057	transcript	F54D5.15a	protein_coding
II	11561835	GAA	[G]	{G, GAA}	0.0757576	1	FALSE	TRUE	FALSE	0.141106	66	0	5	61	G	intron_variant	MODIFIER	F54D5.15	WBGene00010057	transcript	F54D5.15a	protein_coding
II	11561899	G	[A]	{G, A}	0.0151515	1	TRUE	FALSE	TRUE	0.0300717	66	0	1	65	A	intron_variant	MODIFIER	F54D5.15	WBGene00010057	transcript	F54D5.15a	protein_coding
II	11561926	T	[G]	{G, T}	0.893939	1	TRUE	FALSE	FALSE	0.191071	66	0	59	7	G	intron_variant	MODIFIER	F54D5.15	WBGene00010057	transcript	F54D5.15a	protein_coding
II	11561978	A	[T]	{A, T}	0.166667	1	TRUE	FALSE	FALSE	0.279898	66	0	11	55	T	intron_variant	MODIFIER	F54D5.15	WBGene00010057	transcript	F54D5.15a	protein_coding
II	11561989	C	[A]	{C, A}	0.0151515	1	TRUE	FALSE	FALSE	0.0300717	66	0	1	65	A	intron_variant	MODIFIER	F54D5.15	WBGene00010057	transcript	F54D5.15a	protein_coding
II	11562060	C	[T]	{C, T}	0.0151515	1	TRUE	FALSE	TRUE	0.0300717	66	0	1	65	T	intron_variant	MODIFIER	F54D5.15	WBGene00010057	transcript	F54D5.15a	protein_coding
II	11562122	TTTA	[T]	{TTTA, T}	0.136364	1	FALSE	TRUE	FALSE	0.237335	66	0	9	57	T	intron_variant	MODIFIER	F54D5.15	WBGene00010057	transcript	F54D5.15a	protein_coding
II	11562134	C	[A]	{C, A}	0.0757576	1	TRUE	FALSE	FALSE	0.141106	66	0	5	61	A	intron_variant	MODIFIER	F54D5.15	WBGene00010057	transcript	F54D5.15a	protein_coding
II	11562252	C	[A]	{C, A}	0.893939	1	TRUE	FALSE	FALSE	0.191071	66	0	59	7	A	intron_variant	MODIFIER	F54D5.15	WBGene00010057	transcript	F54D5.15a	protein_coding
II	11562273	A	[G]	{G, A}	0.318182	1	TRUE	FALSE	TRUE	0.437196	66	0	21	45	G	intron_variant	MODIFIER	F54D5.15	WBGene00010057	transcript	F54D5.15a	protein_coding
II	11562290	A	[G]	{G, A}	0.893939	1	TRUE	FALSE	TRUE	0.191071	66	0	59	7	G	intron_variant	MODIFIER	F54D5.15	WBGene00010057	transcript	F54D5.15a	protein_coding
II	11562311	G	[A]	{G, A}	0.030303	1	TRUE	FALSE	TRUE	0.0592181	66	0	2	64	A	intron_variant	MODIFIER	F54D5.15	WBGene00010057	transcript	F54D5.15a	protein_coding
II	11562323	A	[G]	{G, A}	0.166667	1	TRUE	FALSE	TRUE	0.279898	66	0	11	55	G	intron_variant	MODIFIER	F54D5.15	WBGene00010057	transcript	F54D5.15a	protein_coding
II	11562399	A	[T]	{A, T}	0.166667	1	TRUE	FALSE	FALSE	0.279898	66	0	11	55	T	intron_variant	MODIFIER	F54D5.15	WBGene00010057	transcript	F54D5.15a	protein_coding
II	11562433	T	[A]	{A, T}	0.0909091	1	TRUE	FALSE	FALSE	0.166551	66	0	6	60	A	intron_variant	MODIFIER	F54D5.15	WBGene00010057	transcript	F54D5.15a	protein_coding
II	11562469	G	[A]	{G, A}	0.166667	1	TRUE	FALSE	TRUE	0.279898	66	0	11	55	A	intron_variant	MODIFIER	F54D5.15	WBGene00010057	transcript	F54D5.15a	protein_coding
II	11562614	A	[T]	{A, T}	0.0454545	1	TRUE	FALSE	FALSE	0.0874393	66	0	3	63	T	intron_variant	MODIFIER	F54D5.15	WBGene00010057	transcript	F54D5.15a	protein_coding
II	11562632	T	[C]	{C, T}	0.166667	1	TRUE	FALSE	TRUE	0.279898	66	0	11	55	C	intron_variant	MODIFIER	F54D5.15	WBGene00010057	transcript	F54D5.15a	protein_coding
II	11562676	AT	[A]	{AT, A}	0.181818	1	FALSE	TRUE	FALSE	0.299792	66	0	12	54	A	intron_variant	MODIFIER	F54D5.15	WBGene00010057	transcript	F54D5.15a	protein_coding
II	11562702	T	[A]	{A, T}	0.0151515	1	TRUE	FALSE	FALSE	0.0300717	66	0	1	65	A	intron_variant	MODIFIER	F54D5.15	WBGene00010057	transcript	F54D5.15a	protein_coding
II	11562905	G	[A]	{G, A}	0.469697	1	TRUE	FALSE	TRUE	0.501966	66	0	31	35	A	intron_variant	MODIFIER	F54D5.15	WBGene00010057	transcript	F54D5.15a	protein_coding
II	11562916	G	[A]	{G, A}	0.0151515	1	TRUE	FALSE	TRUE	0.0300717	66	0	1	65	A	intron_variant	MODIFIER	F54D5.15	WBGene00010057	transcript	F54D5.15a	protein_coding
II	11563245	T	[TG]	{TG, T}	0.893939	1	FALSE	TRUE	FALSE	0.191071	66	0	59	7	TG	5_prime_UTR_variant	MODIFIER	F54D5.15	WBGene00010057	transcript	F54D5.15b.2	protein_coding
II	11563526	C	[A, T]	{C, T}	0.0769231	1	TRUE	FALSE	FALSE	0.143113	65	0	5	60	A	intron_variant	MODIFIER	F54D5.15	WBGene00010057	transcript	F54D5.15a	protein_coding
II	11563529	T	[C]	{C, T}	0.169231	1	TRUE	FALSE	TRUE	0.283363	65	0	11	54	C	intron_variant	MODIFIER	F54D5.15	WBGene00010057	transcript	F54D5.15a	protein_coding
II	11563580	C	[A]	{C, A}	0.0153846	1	TRUE	FALSE	FALSE	0.0305307	65	0	1	64	A	intron_variant	MODIFIER	F54D5.15	WBGene00010057	transcript	F54D5.15a	protein_coding
II	11563629	A	[C]	{C, A}	0.0461538	1	TRUE	FALSE	FALSE	0.0887299	65	0	3	62	C	intron_variant	MODIFIER	F54D5.15	WBGene00010057	transcript	F54D5.15a	protein_coding
II	11563641	T	[A]	{A, T}	0.0153846	1	TRUE	FALSE	FALSE	0.0305307	65	0	1	64	A	intron_variant	MODIFIER	F54D5.15	WBGene00010057	transcript	F54D5.15a	protein_coding
II	11563650	T	[C]	{C, T}	0.0153846	1	TRUE	FALSE	TRUE	0.0305307	65	0	1	64	C	intron_variant	MODIFIER	F54D5.15	WBGene00010057	transcript	F54D5.15a	protein_coding
II	11563677	A	[G]	{G, A}	0.169231	1	TRUE	FALSE	TRUE	0.283363	65	0	11	54	G	intron_variant	MODIFIER	F54D5.15	WBGene00010057	transcript	F54D5.15a	protein_coding
II	11563699	A	[T]	{A, T}	0.0185185	1	TRUE	FALSE	FALSE	0.0366909	54	0	1	53	T	intron_variant	MODIFIER	F54D5.15	WBGene00010057	transcript	F54D5.15a	protein_coding
II	11563711	TA	[T]	{TA, T}	0.150943	1	FALSE	TRUE	FALSE	0.25876	53	0	8	45	T	intron_variant	MODIFIER	F54D5.15	WBGene00010057	transcript	F54D5.15a	protein_coding
II	11563759	C	[T]	{C, T}	0.0740741	1	TRUE	FALSE	TRUE	0.138456	54	0	4	50	T	intron_variant	MODIFIER	F54D5.15	WBGene00010057	transcript	F54D5.15a	protein_coding
II	11563774	T	[C]	{C, T}	0.0461538	1	TRUE	FALSE	TRUE	0.0887299	65	0	3	62	C	intron_variant	MODIFIER	F54D5.15	WBGene00010057	transcript	F54D5.15a	protein_coding
II	11563782	G	[C]	{C, G}	0.0153846	1	TRUE	FALSE	FALSE	0.0305307	65	0	1	64	C	intron_variant	MODIFIER	F54D5.15	WBGene00010057	transcript	F54D5.15a	protein_coding
II	11563816	TA	[T]	{TA, T}	0.016129	1	FALSE	TRUE	FALSE	0.0319958	62	0	1	61	T	intron_variant	MODIFIER	F54D5.15	WBGene00010057	transcript	F54D5.15a	protein_coding
II	11563824	A	[T]	{A, T}	0.016129	1	TRUE	FALSE	FALSE	0.0319958	62	0	1	61	T	intron_variant	MODIFIER	F54D5.15	WBGene00010057	transcript	F54D5.15a	protein_coding
II	11563862	T	[G]	{G, T}	0.177419	1	TRUE	FALSE	FALSE	0.294256	62	0	11	51	G	intron_variant	MODIFIER	F54D5.15	WBGene00010057	transcript	F54D5.15a	protein_coding
II	11563916	TA	[TAA, T]	{TAA, TA}	0.016129	1	FALSE	TRUE	FALSE	0.0319958	62	0	1	61	T	intron_variant	MODIFIER	F54D5.15	WBGene00010057	transcript	F54D5.15a	protein_coding
II	11563941	T	[C]	{C, T}	0.0322581	1	TRUE	FALSE	TRUE	0.0629426	62	0	2	60	C	intron_variant	MODIFIER	F54D5.15	WBGene00010057	transcript	F54D5.15a	protein_coding
II	11563944	A	[G]	{G, A}	0.0483871	1	TRUE	FALSE	TRUE	0.0928403	62	0	3	59	G	intron_variant	MODIFIER	F54D5.15	WBGene00010057	transcript	F54D5.15a	protein_coding
II	11564038	CT	[CTT, C]	{CT, C}	0.145161	1	FALSE	TRUE	FALSE	0.250197	62	0	9	53	C	intron_variant	MODIFIER	F54D5.15	WBGene00010057	transcript	F54D5.15a	protein_coding
II	11564204	A	[G]	{G, A}	0.242424	1	TRUE	FALSE	TRUE	0.370113	66	0	16	50	G	5_prime_UTR_variant	MODIFIER	F54D5.15	WBGene00010057	transcript	F54D5.15a	protein_coding
II	11564512	GA	[G]	{G, GA}	0.0454545	1	FALSE	TRUE	FALSE	0.0874393	66	0	3	63	G	3_prime_UTR_variant	MODIFIER	F54D5.5	WBGene00010051	transcript	F54D5.5b	protein_coding
II	11564526	C	[A]	{C, A}	0.0909091	1	TRUE	FALSE	FALSE	0.166551	66	0	6	60	A	3_prime_UTR_variant	MODIFIER	F54D5.5	WBGene00010051	transcript	F54D5.5b	protein_coding
II	11564548	A	[T]	{A, T}	0.166667	1	TRUE	FALSE	FALSE	0.279898	66	0	11	55	T	3_prime_UTR_variant	MODIFIER	F54D5.5	WBGene00010051	transcript	F54D5.5b	protein_coding
II	11564774	G	[T]	{G, T}	0.0454545	1	TRUE	FALSE	FALSE	0.0874393	66	0	3	63	T	intron_variant	MODIFIER	F54D5.5	WBGene00010051	transcript	F54D5.5b	protein_coding
II	11564779	C	[T]	{C, T}	0.166667	1	TRUE	FALSE	TRUE	0.279898	66	0	11	55	T	intron_variant	MODIFIER	F54D5.5	WBGene00010051	transcript	F54D5.5b	protein_coding
II	11564867	GT	[G]	{G, GT}	0.0151515	1	FALSE	TRUE	FALSE	0.0300717	66	0	1	65	G	intron_variant	MODIFIER	F54D5.5	WBGene00010051	transcript	F54D5.5b	protein_coding
II	11564912	T	[A]	{A, T}	0.318182	1	TRUE	FALSE	FALSE	0.437196	66	0	21	45	A	intron_variant	MODIFIER	F54D5.5	WBGene00010051	transcript	F54D5.5b	protein_coding
II	11564950	T	[TGA, TGC, TGG]	{TGC, TGA, TGG, T}	0.123077	1	FALSE	TRUE	FALSE	0.217531	65	2	7	56	TGA	intron_variant	MODIFIER	F54D5.5	WBGene00010051	transcript	F54D5.5b	protein_coding
II	11564951	G	[GTT, GTC, GTA]	{G, GTA, GTT, GTC}	0.0538462	1	FALSE	TRUE	FALSE	0.102683	65	3	2	60	GTA	intron_variant	MODIFIER	F54D5.5	WBGene00010051	transcript	F54D5.5b	protein_coding
II	11565021	T	[A]	{A, T}	0.0606061	1	TRUE	FALSE	FALSE	0.114735	66	0	4	62	A	intron_variant	MODIFIER	F54D5.5	WBGene00010051	transcript	F54D5.5b	protein_coding
II	11565039	AT	[ATT, A]	{ATT, AT}	0.19697	1	FALSE	TRUE	FALSE	0.31876	66	0	13	53	A	intron_variant	MODIFIER	F54D5.5	WBGene00010051	transcript	F54D5.5b	protein_coding
II	11565121	A	[G]	{G, A}	0.0757576	1	TRUE	FALSE	TRUE	0.141106	66	0	5	61	G	intron_variant	MODIFIER	F54D5.5	WBGene00010051	transcript	F54D5.5b	protein_coding
II	11566408	A	[T]	{A, T}	0.0151515	1	TRUE	FALSE	FALSE	0.0300717	66	0	1	65	T	intron_variant	MODIFIER	F54D5.5	WBGene00010051	transcript	F54D5.5b	protein_coding
II	11566810	T	[G]	{G, T}	0.893939	1	TRUE	FALSE	FALSE	0.191071	66	0	59	7	G	intron_variant	MODIFIER	F54D5.5	WBGene00010051	transcript	F54D5.5b	protein_coding
II	11567159	A	[G]	{G, A}	0.0151515	1	TRUE	FALSE	TRUE	0.0300717	66	0	1	65	G	non_coding_transcript_exon_variant	MODIFIER	F54D5.20	WBGene00198029	transcript	F54D5.20	lincRNA
II	11567266	G	[A]	{G, A}	0.0606061	1	TRUE	FALSE	TRUE	0.114735	66	0	4	62	A	non_coding_transcript_exon_variant	MODIFIER	F54D5.20	WBGene00198029	transcript	F54D5.20	lincRNA
II	11567317	T	[C]	{C, T}	0.166667	1	TRUE	FALSE	TRUE	0.279898	66	0	11	55	C	non_coding_transcript_exon_variant	MODIFIER	F54D5.20	WBGene00198029	transcript	F54D5.20	lincRNA
II	11567430	C	[T]	{C, T}	0.166667	1	TRUE	FALSE	TRUE	0.279898	66	0	11	55	T	non_coding_transcript_exon_variant	MODIFIER	F54D5.21	WBGene00198480	transcript	F54D5.21	lincRNA
II	11568721	C	[CA]	{C, CA}	0.106061	1	FALSE	TRUE	FALSE	0.191071	66	0	7	59	CA	3_prime_UTR_variant	MODIFIER	F54D5.23	WBGene00219434	transcript	F54D5.23	protein_coding
II	11568800	G	[A]	{G, A}	0.166667	1	TRUE	FALSE	TRUE	0.279898	66	0	11	55	A	3_prime_UTR_variant	MODIFIER	F54D5.23	WBGene00219434	transcript	F54D5.23	protein_coding
II	11568808	A	[ATT]	{ATT, A}	0.0757576	1	FALSE	TRUE	FALSE	0.141106	66	0	5	61	ATT	3_prime_UTR_variant	MODIFIER	F54D5.23	WBGene00219434	transcript	F54D5.23	protein_coding
II	11568812	T	[TTA, TTG]	{TTG, T}	0.0153846	1	FALSE	TRUE	FALSE	0.0305307	65	0	1	64	TTA	3_prime_UTR_variant	MODIFIER	F54D5.23	WBGene00219434	transcript	F54D5.23	protein_coding
II	11568847	G	[T]	{G, T}	0.893939	1	TRUE	FALSE	FALSE	0.191071	66	0	59	7	T	3_prime_UTR_variant	MODIFIER	F54D5.23	WBGene00219434	transcript	F54D5.23	protein_coding
II	11568855	C	[T]	{C, T}	0.0151515	1	TRUE	FALSE	TRUE	0.0300717	66	0	1	65	T	3_prime_UTR_variant	MODIFIER	F54D5.23	WBGene00219434	transcript	F54D5.23	protein_coding
II	11568921	T	[C]	{C, T}	0.0151515	1	TRUE	FALSE	TRUE	0.0300717	66	0	1	65	C	3_prime_UTR_variant	MODIFIER	F54D5.23	WBGene00219434	transcript	F54D5.23	protein_coding
II	11569135	C	[T]	{C, T}	0.0757576	1	TRUE	FALSE	TRUE	0.141106	66	0	5	61	T	intron_variant	MODIFIER	F54D5.23	WBGene00219434	transcript	F54D5.23	protein_coding
II	11569145	C	[T]	{C, T}	0.166667	1	TRUE	FALSE	TRUE	0.279898	66	0	11	55	T	intron_variant	MODIFIER	F54D5.23	WBGene00219434	transcript	F54D5.23	protein_coding
II	11570459	A	[C]	{C, A}	0.0151515	1	TRUE	FALSE	FALSE	0.0300717	66	0	1	65	C	intron_variant	MODIFIER	F54D5.4	WBGene00010050	transcript	F54D5.4	protein_coding
II	11570473	A	[ATCCTGATTCC]	{ATCCTGATTCC, A}	0.166667	1	FALSE	TRUE	FALSE	0.279898	66	0	11	55	ATCCTGATTCC	intron_variant	MODIFIER	F54D5.4	WBGene00010050	transcript	F54D5.4	protein_coding
II	11570482	A	[T]	{A, T}	0.0151515	1	TRUE	FALSE	FALSE	0.0300717	66	0	1	65	T	intron_variant	MODIFIER	F54D5.4	WBGene00010050	transcript	F54D5.4	protein_coding
II	11570547	A	[G]	{G, A}	0.0151515	1	TRUE	FALSE	TRUE	0.0300717	66	0	1	65	G	intron_variant	MODIFIER	F54D5.4	WBGene00010050	transcript	F54D5.4	protein_coding
II	11570647	A	[T]	{A, T}	0.0606061	1	TRUE	FALSE	FALSE	0.114735	66	0	4	62	T	intron_variant	MODIFIER	F54D5.4	WBGene00010050	transcript	F54D5.4	protein_coding
II	11570681	T	[C]	{C, T}	0.0909091	1	TRUE	FALSE	TRUE	0.166551	66	0	6	60	C	intron_variant	MODIFIER	F54D5.4	WBGene00010050	transcript	F54D5.4	protein_coding
II	11570699	T	[C]	{C, T}	0.166667	1	TRUE	FALSE	TRUE	0.279898	66	0	11	55	C	intron_variant	MODIFIER	F54D5.4	WBGene00010050	transcript	F54D5.4	protein_coding
II	11572196	AT	[A]	{AT, A}	0.0151515	1	FALSE	TRUE	FALSE	0.0300717	66	0	1	65	A	intron_variant	MODIFIER	F54D5.3	WBGene00010049	transcript	F54D5.3	protein_coding
II	11572292	T	[C]	{C, T}	0.0151515	1	TRUE	FALSE	TRUE	0.0300717	66	0	1	65	C	intron_variant	MODIFIER	F54D5.3	WBGene00010049	transcript	F54D5.3	protein_coding
II	11572305	C	[T]	{C, T}	0.0909091	1	TRUE	FALSE	TRUE	0.166551	66	0	6	60	T	intron_variant	MODIFIER	F54D5.3	WBGene00010049	transcript	F54D5.3	protein_coding
II	11572315	ACAT	[A]	{ACAT, A}	0.0151515	1	FALSE	TRUE	FALSE	0.0300717	66	0	1	65	A	intron_variant	MODIFIER	F54D5.3	WBGene00010049	transcript	F54D5.3	protein_coding
II	11572405	GT	[G]	{G, GT}	0.545455	1	FALSE	TRUE	FALSE	0.499653	66	0	36	30	G	intron_variant	MODIFIER	F54D5.3	WBGene00010049	transcript	F54D5.3	protein_coding
II	11572472	G	[T]	{G, T}	0.0153846	1	TRUE	FALSE	FALSE	0.0305307	65	0	1	64	T	intron_variant	MODIFIER	F54D5.3	WBGene00010049	transcript	F54D5.3	protein_coding
II	11572547	A	[T]	{A, T}	0.0461538	1	TRUE	FALSE	FALSE	0.0887299	65	0	3	62	T	intron_variant	MODIFIER	F54D5.3	WBGene00010049	transcript	F54D5.3	protein_coding
II	11572718	T	[A]	{A, T}	0.0909091	1	TRUE	FALSE	FALSE	0.166551	66	0	6	60	A	intron_variant	MODIFIER	F54D5.3	WBGene00010049	transcript	F54D5.3	protein_coding
II	11572850	C	[CAA, CAAA]	{C, CAA}	0.166667	1	FALSE	TRUE	FALSE	0.279898	66	0	11	55	CAA	intron_variant	MODIFIER	F54D5.3	WBGene00010049	transcript	F54D5.3	protein_coding
II	11572859	T	[A]	{A, T}	0.0151515	1	TRUE	FALSE	FALSE	0.0300717	66	0	1	65	A	intron_variant	MODIFIER	F54D5.3	WBGene00010049	transcript	F54D5.3	protein_coding
II	11572861	G	[T]	{G, T}	0.0151515	1	TRUE	FALSE	FALSE	0.0300717	66	0	1	65	T	intron_variant	MODIFIER	F54D5.3	WBGene00010049	transcript	F54D5.3	protein_coding
II	11572879	A	[T]	{A, T}	0.0909091	1	TRUE	FALSE	FALSE	0.166551	66	0	6	60	T	intron_variant	MODIFIER	F54D5.3	WBGene00010049	transcript	F54D5.3	protein_coding
II	11573230	C	[T]	{C, T}	0.169231	1	TRUE	FALSE	TRUE	0.283363	65	0	11	54	T	5_prime_UTR_variant	MODIFIER	F54D5.2	WBGene00010048	transcript	F54D5.2	protein_coding
II	11573269	G	[A]	{G, A}	0.0461538	1	TRUE	FALSE	TRUE	0.0887299	65	0	3	62	A	5_prime_UTR_variant	MODIFIER	F54D5.2	WBGene00010048	transcript	F54D5.2	protein_coding
II	11573608	G	[A]	{G, A}	0.0153846	1	TRUE	FALSE	TRUE	0.0305307	65	0	1	64	A	intron_variant	MODIFIER	F54D5.2	WBGene00010048	transcript	F54D5.2	protein_coding
II	11573620	CT	[C]	{CT, C}	0.0307692	1	FALSE	TRUE	FALSE	0.0601073	65	0	2	63	C	intron_variant	MODIFIER	F54D5.2	WBGene00010048	transcript	F54D5.2	protein_coding
II	11573624	T	[A]	{A, T}	0.0153846	1	TRUE	FALSE	FALSE	0.0305307	65	0	1	64	A	intron_variant	MODIFIER	F54D5.2	WBGene00010048	transcript	F54D5.2	protein_coding
II	11573910	A	[AT, ATT]	{ATT, AT, A}	0.878788	1	FALSE	TRUE	FALSE	0.214666	66	0	58	8	AT	intron_variant	MODIFIER	F54D5.2	WBGene00010048	transcript	F54D5.2	protein_coding
II	11574165	T	[C]	{C, T}	0.0151515	1	TRUE	FALSE	TRUE	0.0300717	66	0	1	65	C	intron_variant	MODIFIER	F54D5.2	WBGene00010048	transcript	F54D5.2	protein_coding
II	11574276	AT	[A, ACT]	{ACT, AT, A}	0.030303	1	FALSE	TRUE	FALSE	0.0592181	66	0	2	64	ACT	intron_variant	MODIFIER	F54D5.2	WBGene00010048	transcript	F54D5.2	protein_coding
II	11574277	T	[A, C]	{C, A, T}	0.0454545	1	TRUE	FALSE	FALSE	0.0874393	66	0	3	63	A	intron_variant	MODIFIER	F54D5.2	WBGene00010048	transcript	F54D5.2	protein_coding
II	11574278	T	[A]	{A, T}	0.1	1	TRUE	FALSE	FALSE	0.183051	30	0	3	27	A	intron_variant	MODIFIER	F54D5.2	WBGene00010048	transcript	F54D5.2	protein_coding
II	11574278	TAA	[TA, T]	{TAA, TA, T}	0.571429	1	FALSE	TRUE	FALSE	0.493714	63	0	36	27	T	intron_variant	MODIFIER	F54D5.2	WBGene00010048	transcript	F54D5.2	protein_coding
II	11574282	A	[T]	{A, T}	0.0172414	1	TRUE	FALSE	FALSE	0.0341829	58	0	1	57	T	intron_variant	MODIFIER	F54D5.2	WBGene00010048	transcript	F54D5.2	protein_coding
II	11574291	C	[A]	{C, A}	0.0923077	1	TRUE	FALSE	FALSE	0.168873	65	0	6	59	A	intron_variant	MODIFIER	F54D5.2	WBGene00010048	transcript	F54D5.2	protein_coding
II	11574725	AT	[A]	{AT, A}	0.171875	1	FALSE	TRUE	FALSE	0.286909	64	0	11	53	A	intron_variant	MODIFIER	F54D5.2	WBGene00010048	transcript	F54D5.2	protein_coding
II	11574970	T	[C]	{C, T}	0.171875	1	TRUE	FALSE	TRUE	0.286909	64	0	11	53	C	3_prime_UTR_variant	MODIFIER	F54D5.2	WBGene00010048	transcript	F54D5.2	protein_coding
II	11574993	T	[C]	{C, T}	0.0153846	1	TRUE	FALSE	TRUE	0.0305307	65	0	1	64	C	3_prime_UTR_variant	MODIFIER	F54D5.2	WBGene00010048	transcript	F54D5.2	protein_coding
II	11575299	A	[G]	{G, A}	0.0769231	1	TRUE	FALSE	TRUE	0.143113	65	0	5	60	G	intron_variant	MODIFIER	pcs-1	WBGene00003960	transcript	F54D5.1a	protein_coding
II	11575323	C	[A]	{C, A}	0.893939	1	TRUE	FALSE	FALSE	0.191071	66	0	59	7	A	intron_variant	MODIFIER	pcs-1	WBGene00003960	transcript	F54D5.1a	protein_coding
II	11575367	AAT	[A]	{AAT, A}	0.257576	1	FALSE	TRUE	FALSE	0.385381	66	0	17	49	A	intron_variant	MODIFIER	pcs-1	WBGene00003960	transcript	F54D5.1a	protein_coding
II	11575382	G	[A]	{G, A}	0.166667	1	TRUE	FALSE	TRUE	0.279898	66	0	11	55	A	intron_variant	MODIFIER	pcs-1	WBGene00003960	transcript	F54D5.1a	protein_coding
II	11575418	GT	[G, GTT]	{G, GT}	0.0909091	1	FALSE	TRUE	FALSE	0.166551	66	0	6	60	G	intron_variant	MODIFIER	pcs-1	WBGene00003960	transcript	F54D5.1a	protein_coding
II	11575458	A	[G]	{G, A}	0.166667	1	TRUE	FALSE	TRUE	0.279898	66	0	11	55	G	intron_variant	MODIFIER	pcs-1	WBGene00003960	transcript	F54D5.1a	protein_coding
II	11575481	A	[T]	{A, T}	0.0757576	1	TRUE	FALSE	FALSE	0.141106	66	0	5	61	T	intron_variant	MODIFIER	pcs-1	WBGene00003960	transcript	F54D5.1a	protein_coding
II	11575493	G	[T]	{G, T}	0.166667	1	TRUE	FALSE	FALSE	0.279898	66	0	11	55	T	intron_variant	MODIFIER	pcs-1	WBGene00003960	transcript	F54D5.1a	protein_coding
II	11575514	G	[GA]	{G, GA}	0.0909091	1	FALSE	TRUE	FALSE	0.166551	66	0	6	60	GA	intron_variant	MODIFIER	pcs-1	WBGene00003960	transcript	F54D5.1a	protein_coding
II	11575565	A	[G]	{G, A}	0.0151515	1	TRUE	FALSE	TRUE	0.0300717	66	0	1	65	G	intron_variant	MODIFIER	pcs-1	WBGene00003960	transcript	F54D5.1a	protein_coding
II	11575588	A	[G]	{G, A}	0.166667	1	TRUE	FALSE	TRUE	0.279898	66	0	11	55	G	intron_variant	MODIFIER	pcs-1	WBGene00003960	transcript	F54D5.1a	protein_coding
II	11575609	G	[T]	{G, T}	0.0151515	1	TRUE	FALSE	FALSE	0.0300717	66	0	1	65	T	intron_variant	MODIFIER	pcs-1	WBGene00003960	transcript	F54D5.1a	protein_coding
II	11576459	G	[T]	{G, T}	0.166667	1	TRUE	FALSE	FALSE	0.279898	66	0	11	55	T	intron_variant	MODIFIER	pcs-1	WBGene00003960	transcript	F54D5.1a	protein_coding
II	11576585	T	[A]	{A, T}	0.169231	1	TRUE	FALSE	FALSE	0.283363	65	0	11	54	A	intron_variant	MODIFIER	pcs-1	WBGene00003960	transcript	F54D5.1a	protein_coding
II	11576698	A	[G]	{G, A}	0.0461538	1	TRUE	FALSE	TRUE	0.0887299	65	0	3	62	G	intron_variant	MODIFIER	pcs-1	WBGene00003960	transcript	F54D5.1a	protein_coding
II	11576812	A	[T]	{A, T}	0.0153846	1	TRUE	FALSE	FALSE	0.0305307	65	0	1	64	T	intron_variant	MODIFIER	pcs-1	WBGene00003960	transcript	F54D5.1a	protein_coding
II	11579203	A	[C]	{C, A}	0.0454545	1	TRUE	FALSE	FALSE	0.0874393	66	0	3	63	C	intron_variant	MODIFIER	smc-6	WBGene00010056	transcript	F54D5.14	protein_coding
II	11580337	A	[T]	{A, T}	0.166667	1	TRUE	FALSE	FALSE	0.279898	66	0	11	55	T	intron_variant	MODIFIER	smc-6	WBGene00010056	transcript	F54D5.14	protein_coding
II	11580347	T	[A]	{A, T}	0.0151515	1	TRUE	FALSE	FALSE	0.0300717	66	0	1	65	A	intron_variant	MODIFIER	smc-6	WBGene00010056	transcript	F54D5.14	protein_coding
II	11582519	G	[C]	{C, G}	0.378788	1	TRUE	FALSE	FALSE	0.474208	66	0	25	41	C	3_prime_UTR_variant	MODIFIER	smc-6	WBGene00010056	transcript	F54D5.14	protein_coding
II	11582529	T	[C]	{C, T}	0.0151515	1	TRUE	FALSE	TRUE	0.0300717	66	0	1	65	C	3_prime_UTR_variant	MODIFIER	smc-6	WBGene00010056	transcript	F54D5.14	protein_coding
II	11582539	A	[G]	{G, A}	0.0454545	1	TRUE	FALSE	TRUE	0.0874393	66	0	3	63	G	3_prime_UTR_variant	MODIFIER	smc-6	WBGene00010056	transcript	F54D5.14	protein_coding
II	11582568	T	[A]	{A, T}	0.0151515	1	TRUE	FALSE	FALSE	0.0300717	66	0	1	65	A	3_prime_UTR_variant	MODIFIER	smc-6	WBGene00010056	transcript	F54D5.14	protein_coding
II	11582576	TTATCG	[T]	{T, TTATCG}	0.0151515	1	FALSE	TRUE	FALSE	0.0300717	66	0	1	65	T	3_prime_UTR_variant	MODIFIER	smc-6	WBGene00010056	transcript	F54D5.14	protein_coding
II	11582577	TATCGG	[T]	{TATCGG, T}	0.0151515	1	FALSE	TRUE	FALSE	0.0300717	66	0	1	65	T	3_prime_UTR_variant	MODIFIER	smc-6	WBGene00010056	transcript	F54D5.14	protein_coding
II	11583123	GA	[G]	{G, GA}	0.030303	1	FALSE	TRUE	FALSE	0.0592181	66	0	2	64	G	intron_variant	MODIFIER	D1043.1	WBGene00008361	transcript	D1043.1	protein_coding
II	11583186	G	[A]	{G, A}	0.0757576	1	TRUE	FALSE	TRUE	0.141106	66	0	5	61	A	intron_variant	MODIFIER	D1043.1	WBGene00008361	transcript	D1043.1	protein_coding
II	11583220	AT	[A]	{AT, A}	0.166667	1	FALSE	TRUE	FALSE	0.279898	66	0	11	55	A	intron_variant	MODIFIER	D1043.1	WBGene00008361	transcript	D1043.1	protein_coding
II	11583250	G	[A]	{G, A}	0.0151515	1	TRUE	FALSE	TRUE	0.0300717	66	0	1	65	A	intron_variant	MODIFIER	D1043.1	WBGene00008361	transcript	D1043.1	protein_coding
II	11583259	A	[G]	{G, A}	0.0151515	1	TRUE	FALSE	TRUE	0.0300717	66	0	1	65	G	intron_variant	MODIFIER	D1043.1	WBGene00008361	transcript	D1043.1	protein_coding
II	11583288	T	[A]	{A, T}	0.0757576	1	TRUE	FALSE	FALSE	0.141106	66	0	5	61	A	intron_variant	MODIFIER	D1043.1	WBGene00008361	transcript	D1043.1	protein_coding
II	11583909	A	[G]	{G, A}	0.0151515	1	TRUE	FALSE	TRUE	0.0300717	66	0	1	65	G	intron_variant	MODIFIER	D1043.1	WBGene00008361	transcript	D1043.1	protein_coding
II	11583968	C	[T]	{C, T}	0.0151515	1	TRUE	FALSE	TRUE	0.0300717	66	0	1	65	T	intron_variant	MODIFIER	D1043.1	WBGene00008361	transcript	D1043.1	protein_coding
II	11583970	A	[AT]	{AT, A}	0.0454545	1	FALSE	TRUE	FALSE	0.0874393	66	0	3	63	AT	intron_variant	MODIFIER	D1043.1	WBGene00008361	transcript	D1043.1	protein_coding
II	11584002	G	[T]	{G, T}	0.030303	1	TRUE	FALSE	FALSE	0.0592181	66	0	2	64	T	intron_variant	MODIFIER	D1043.1	WBGene00008361	transcript	D1043.1	protein_coding
II	11584018	G	[T]	{G, T}	0.0909091	1	TRUE	FALSE	FALSE	0.166551	66	0	6	60	T	intron_variant	MODIFIER	D1043.1	WBGene00008361	transcript	D1043.1	protein_coding
II	11584052	T	[A]	{A, T}	0.166667	1	TRUE	FALSE	FALSE	0.279898	66	0	11	55	A	intron_variant	MODIFIER	D1043.1	WBGene00008361	transcript	D1043.1	protein_coding
II	11584344	T	[TATTAAA]	{TATTAAA, T}	0.151515	1	FALSE	TRUE	FALSE	0.259079	66	2	9	55	TATTAAA	intron_variant	MODIFIER	D1043.1	WBGene00008361	transcript	D1043.1	protein_coding
II	11584346	T	[TAAAAAA, TTAAAAA, TTAAAAG]	{TTAAAAA, T}	0.0153846	1	FALSE	TRUE	FALSE	0.0305307	65	0	1	64	TAAAAAA	intron_variant	MODIFIER	D1043.1	WBGene00008361	transcript	D1043.1	protein_coding
II	11584353	T	[TAAAAAC, TAAATAA, TAAATAC, TAAATAG]	{TAAATAA, T}	0.0178571	1	FALSE	TRUE	FALSE	0.0353925	56	0	1	55	TAAAAAC	intron_variant	MODIFIER	D1043.1	WBGene00008361	transcript	D1043.1	protein_coding
II	11584354	CA	[C, CAATATTA]	{C, CA}	0.814815	1	FALSE	TRUE	FALSE	0.304604	54	0	44	10	C	intron_variant	MODIFIER	D1043.1	WBGene00008361	transcript	D1043.1	protein_coding
II	11584387	G	[T]	{G, T}	0.0151515	1	TRUE	FALSE	FALSE	0.0300717	66	0	1	65	T	intron_variant	MODIFIER	D1043.1	WBGene00008361	transcript	D1043.1	protein_coding
II	11584427	CA	[C]	{C, CA}	0.0151515	1	FALSE	TRUE	FALSE	0.0300717	66	0	1	65	C	intron_variant	MODIFIER	D1043.1	WBGene00008361	transcript	D1043.1	protein_coding
II	11584469	C	[T]	{C, T}	0.0151515	1	TRUE	FALSE	TRUE	0.0300717	66	0	1	65	T	intron_variant	MODIFIER	D1043.1	WBGene00008361	transcript	D1043.1	protein_coding
II	11584487	C	[T]	{C, T}	0.393939	1	TRUE	FALSE	TRUE	0.481147	66	0	26	40	T	intron_variant	MODIFIER	D1043.1	WBGene00008361	transcript	D1043.1	protein_coding
II	11584580	CG	[C]	{C, CG}	0.0151515	1	FALSE	TRUE	FALSE	0.0300717	66	0	1	65	C	intron_variant	MODIFIER	D1043.1	WBGene00008361	transcript	D1043.1	protein_coding
II	11584581	GA	[GAA, G, GAAA]	{GAAA, G, GAA, GA}	0.538462	1	FALSE	TRUE	FALSE	0.500894	65	0	35	30	G	intron_variant	MODIFIER	D1043.1	WBGene00008361	transcript	D1043.1	protein_coding
II	11584584	A	[AAT, AAC]	{AAT, A}	0.0178571	1	FALSE	TRUE	FALSE	0.0353925	56	0	1	55	AAC	intron_variant	MODIFIER	D1043.1	WBGene00008361	transcript	D1043.1	protein_coding
II	11584589	A	[AAG, AAT]	{AAG, A}	0.0151515	1	FALSE	TRUE	FALSE	0.0300717	66	0	1	65	AAG	intron_variant	MODIFIER	D1043.1	WBGene00008361	transcript	D1043.1	protein_coding
II	11584645	G	[T]	{G, T}	0.0151515	1	TRUE	FALSE	FALSE	0.0300717	66	0	1	65	T	intron_variant	MODIFIER	D1043.1	WBGene00008361	transcript	D1043.1	protein_coding
II	11584646	A	[G]	{G, A}	0.409091	1	TRUE	FALSE	TRUE	0.487162	66	0	27	39	G	intron_variant	MODIFIER	D1043.1	WBGene00008361	transcript	D1043.1	protein_coding
II	11584718	GA	[G]	{G, GA}	0.0681818	1	FALSE	TRUE	FALSE	0.128036	66	1	4	61	G	intron_variant	MODIFIER	D1043.1	WBGene00008361	transcript	D1043.1	protein_coding
II	11584743	GA	[G]	{G, GA}	0.878788	1	FALSE	TRUE	FALSE	0.214666	66	0	58	8	G	intron_variant	MODIFIER	D1043.1	WBGene00008361	transcript	D1043.1	protein_coding
II	11584796	GCA	[GA, G]	{GA, GCA}	0.0390625	1	FALSE	TRUE	FALSE	0.0756644	64	1	2	61	GA	intron_variant	MODIFIER	D1043.1	WBGene00008361	transcript	D1043.1	protein_coding
II	11584797	CAA	[CA, C]	{C, CAA, CA}	0.325758	1	FALSE	TRUE	FALSE	0.442632	66	3	20	43	C	intron_variant	MODIFIER	D1043.1	WBGene00008361	transcript	D1043.1	protein_coding
II	11584818	A	[G]	{G, A}	0.0606061	1	TRUE	FALSE	TRUE	0.114735	66	0	4	62	G	intron_variant	MODIFIER	D1043.1	WBGene00008361	transcript	D1043.1	protein_coding
II	11584841	CA	[C, CAA]	{CAA, CA}	0.348485	1	FALSE	TRUE	FALSE	0.457553	66	2	22	42	C	intron_variant	MODIFIER	D1043.1	WBGene00008361	transcript	D1043.1	protein_coding
II	11584886	A	[G]	{G, A}	0.0151515	1	TRUE	FALSE	TRUE	0.0300717	66	0	1	65	G	intron_variant	MODIFIER	D1043.1	WBGene00008361	transcript	D1043.1	protein_coding
II	11584912	G	[A]	{G, A}	0.0151515	1	TRUE	FALSE	TRUE	0.0300717	66	0	1	65	A	intron_variant	MODIFIER	D1043.1	WBGene00008361	transcript	D1043.1	protein_coding
II	11584948	CA	[C]	{C, CA}	0.0151515	1	FALSE	TRUE	FALSE	0.0300717	66	0	1	65	C	intron_variant	MODIFIER	D1043.1	WBGene00008361	transcript	D1043.1	protein_coding
II	11584959	A	[C]	{C, A}	0.893939	1	TRUE	FALSE	FALSE	0.191071	66	0	59	7	C	intron_variant	MODIFIER	D1043.1	WBGene00008361	transcript	D1043.1	protein_coding
II	11585356	T	[C]	{C, T}	0.0151515	1	TRUE	FALSE	TRUE	0.0300717	66	0	1	65	C	intron_variant	MODIFIER	D1043.1	WBGene00008361	transcript	D1043.1	protein_coding
II	11586122	T	[A]	{A, T}	0.0327869	1	TRUE	FALSE	FALSE	0.063948	61	0	2	59	A	intron_variant	MODIFIER	D1043.1	WBGene00008361	transcript	D1043.1	protein_coding
II	11586122	TA	[T]	{TA, T}	0.078125	1	FALSE	TRUE	FALSE	0.145177	64	0	5	59	T	intron_variant	MODIFIER	D1043.1	WBGene00008361	transcript	D1043.1	protein_coding
II	11586123	A	[T]	{A, T}	0.015873	1	TRUE	FALSE	FALSE	0.0314921	63	0	1	62	T	intron_variant	MODIFIER	D1043.1	WBGene00008361	transcript	D1043.1	protein_coding
II	11586149	C	[T]	{C, T}	0.0757576	1	TRUE	FALSE	TRUE	0.141106	66	0	5	61	T	intron_variant	MODIFIER	D1043.1	WBGene00008361	transcript	D1043.1	protein_coding
II	11586213	TAC	[T]	{TAC, T}	0.0606061	1	FALSE	TRUE	FALSE	0.114735	66	0	4	62	T	intron_variant	MODIFIER	D1043.1	WBGene00008361	transcript	D1043.1	protein_coding
II	11586297	G	[T]	{G, T}	0.318182	1	TRUE	FALSE	FALSE	0.437196	66	0	21	45	T	intron_variant	MODIFIER	D1043.1	WBGene00008361	transcript	D1043.1	protein_coding
II	11586308	TTTG	[T]	{TTTG, T}	0.0757576	1	FALSE	TRUE	FALSE	0.141106	66	0	5	61	T	intron_variant	MODIFIER	D1043.1	WBGene00008361	transcript	D1043.1	protein_coding
II	11586350	C	[G]	{C, G}	0.0151515	1	TRUE	FALSE	FALSE	0.0300717	66	0	1	65	G	intron_variant	MODIFIER	D1043.1	WBGene00008361	transcript	D1043.1	protein_coding
II	11586380	A	[G]	{G, A}	0.272727	1	TRUE	FALSE	TRUE	0.399722	66	0	18	48	G	intron_variant	MODIFIER	D1043.1	WBGene00008361	transcript	D1043.1	protein_coding
II	11586489	A	[T]	{A, T}	0.0151515	1	TRUE	FALSE	FALSE	0.0300717	66	0	1	65	T	intron_variant	MODIFIER	D1043.1	WBGene00008361	transcript	D1043.1	protein_coding
II	11586748	T	[A]	{A, T}	0.848485	1	TRUE	FALSE	FALSE	0.259079	66	0	56	10	A	intron_variant	MODIFIER	D1043.1	WBGene00008361	transcript	D1043.1	protein_coding
II	11587153	T	[A]	{A, T}	0.181818	1	TRUE	FALSE	FALSE	0.299792	66	0	12	54	A	intron_variant	MODIFIER	D1043.1	WBGene00008361	transcript	D1043.1	protein_coding
II	11587154	T	[A]	{A, T}	0.348485	1	TRUE	FALSE	FALSE	0.457553	66	0	23	43	A	intron_variant	MODIFIER	D1043.1	WBGene00008361	transcript	D1043.1	protein_coding
II	11587155	T	[A]	{A, T}	0.727273	1	TRUE	FALSE	FALSE	0.399722	66	0	48	18	A	intron_variant	MODIFIER	D1043.1	WBGene00008361	transcript	D1043.1	protein_coding
II	11587348	C	[CA]	{C, CA}	0.363636	1	FALSE	TRUE	FALSE	0.466343	66	0	24	42	CA	intron_variant	MODIFIER	D1043.1	WBGene00008361	transcript	D1043.1	protein_coding
II	11587397	T	[A]	{A, T}	0.212121	1	TRUE	FALSE	FALSE	0.336803	66	0	14	52	A	intron_variant	MODIFIER	D1043.1	WBGene00008361	transcript	D1043.1	protein_coding
II	11587398	A	[T]	{A, T}	0.121212	1	TRUE	FALSE	FALSE	0.214666	66	0	8	58	T	intron_variant	MODIFIER	D1043.1	WBGene00008361	transcript	D1043.1	protein_coding
II	11587418	GA	[G, GAA]	{G, GA}	0.0757576	1	FALSE	TRUE	FALSE	0.141106	66	0	5	61	G	intron_variant	MODIFIER	D1043.1	WBGene00008361	transcript	D1043.1	protein_coding
II	11587451	T	[C]	{C, T}	0.166667	1	TRUE	FALSE	TRUE	0.279898	66	0	11	55	C	intron_variant	MODIFIER	D1043.1	WBGene00008361	transcript	D1043.1	protein_coding
II	11587458	A	[G]	{G, A}	0.0151515	1	TRUE	FALSE	TRUE	0.0300717	66	0	1	65	G	intron_variant	MODIFIER	D1043.1	WBGene00008361	transcript	D1043.1	protein_coding
II	11587550	G	[GATCCTACAGTA]	{G, GATCCTACAGTA}	0.0833333	1	FALSE	TRUE	FALSE	0.153944	66	3	4	59	GATCCTACAGTA	intron_variant	MODIFIER	D1043.1	WBGene00008361	transcript	D1043.1	protein_coding
II	11587698	C	[T]	{C, T}	0.0151515	1	TRUE	FALSE	TRUE	0.0300717	66	0	1	65	T	intron_variant	MODIFIER	D1043.1	WBGene00008361	transcript	D1043.1	protein_coding
II	11587728	C	[T]	{C, T}	0.151515	1	TRUE	FALSE	TRUE	0.259079	66	0	10	56	T	intron_variant	MODIFIER	D1043.1	WBGene00008361	transcript	D1043.1	protein_coding
II	11587734	TA	[T]	{TA, T}	0.0151515	1	FALSE	TRUE	FALSE	0.0300717	66	0	1	65	T	intron_variant	MODIFIER	D1043.1	WBGene00008361	transcript	D1043.1	protein_coding
II	11587789	T	[C]	{C, T}	0.454545	1	TRUE	FALSE	TRUE	0.499653	66	0	30	36	C	intron_variant	MODIFIER	D1043.1	WBGene00008361	transcript	D1043.1	protein_coding
II	11587793	TAAAATTACAAGTTA	[T]	{TAAAATTACAAGTTA, T}	0.0151515	1	FALSE	TRUE	FALSE	0.0300717	66	0	1	65	T	intron_variant	MODIFIER	D1043.1	WBGene00008361	transcript	D1043.1	protein_coding
II	11587804	G	[C]	{C, G}	0.0454545	1	TRUE	FALSE	FALSE	0.0874393	66	0	3	63	C	intron_variant	MODIFIER	D1043.1	WBGene00008361	transcript	D1043.1	protein_coding
II	11587818	AT	[A]	{AT, A}	0.166667	1	FALSE	TRUE	FALSE	0.279898	66	0	11	55	A	intron_variant	MODIFIER	D1043.1	WBGene00008361	transcript	D1043.1	protein_coding
II	11587839	C	[T]	{C, T}	0.0151515	1	TRUE	FALSE	TRUE	0.0300717	66	0	1	65	T	intron_variant	MODIFIER	D1043.1	WBGene00008361	transcript	D1043.1	protein_coding
II	11588162	C	[CA]	{C, CA}	0.0757576	1	FALSE	TRUE	FALSE	0.141106	66	0	5	61	CA	intron_variant	MODIFIER	D1043.1	WBGene00008361	transcript	D1043.1	protein_coding
II	11588170	A	[AT, AAT]	{AT, A}	0.784615	1	FALSE	TRUE	FALSE	0.340608	65	0	51	14	AAT	intron_variant	MODIFIER	D1043.1	WBGene00008361	transcript	D1043.1	protein_coding
II	11588415	T	[C]	{C, T}	0.0757576	1	TRUE	FALSE	TRUE	0.141106	66	0	5	61	C	3_prime_UTR_variant	MODIFIER	D1043.1	WBGene00008361	transcript	D1043.1	protein_coding
II	11589105	C	[A]	{C, A}	0.0151515	1	TRUE	FALSE	FALSE	0.0300717	66	0	1	65	A	intron_variant	MODIFIER	F07A11.1	WBGene00008545	transcript	F07A11.1	protein_coding
II	11589113	C	[T]	{C, T}	0.893939	1	TRUE	FALSE	TRUE	0.191071	66	0	59	7	T	intron_variant	MODIFIER	F07A11.1	WBGene00008545	transcript	F07A11.1	protein_coding
II	11589422	G	[A]	{G, A}	0.0757576	1	TRUE	FALSE	TRUE	0.141106	66	0	5	61	A	intron_variant	MODIFIER	F07A11.1	WBGene00008545	transcript	F07A11.1	protein_coding
II	11589426	A	[G]	{G, A}	0.848485	1	TRUE	FALSE	TRUE	0.259079	66	0	56	10	G	intron_variant	MODIFIER	F07A11.1	WBGene00008545	transcript	F07A11.1	protein_coding
II	11589439	C	[A]	{C, A}	0.0151515	1	TRUE	FALSE	FALSE	0.0300717	66	0	1	65	A	intron_variant	MODIFIER	F07A11.1	WBGene00008545	transcript	F07A11.1	protein_coding
II	11589498	T	[A]	{A, T}	0.272727	1	TRUE	FALSE	FALSE	0.399722	66	0	18	48	A	intron_variant	MODIFIER	F07A11.1	WBGene00008545	transcript	F07A11.1	protein_coding
II	11589505	G	[A]	{G, A}	0.0151515	1	TRUE	FALSE	TRUE	0.0300717	66	0	1	65	A	intron_variant	MODIFIER	F07A11.1	WBGene00008545	transcript	F07A11.1	protein_coding
II	11589563	G	[A]	{G, A}	0.0151515	1	TRUE	FALSE	TRUE	0.0300717	66	0	1	65	A	intron_variant	MODIFIER	F07A11.1	WBGene00008545	transcript	F07A11.1	protein_coding
II	11589610	A	[G]	{G, A}	0.777778	1	TRUE	FALSE	TRUE	0.348444	63	2	48	13	G	intron_variant	MODIFIER	F07A11.1	WBGene00008545	transcript	F07A11.1	protein_coding
II	11589611	TAGATATGAAATATATATATA	[T]	{TAGATATGAAATATATATATA, T}	0.848485	1	FALSE	TRUE	FALSE	0.259079	66	0	56	10	T	intron_variant	MODIFIER	F07A11.1	WBGene00008545	transcript	F07A11.1	protein_coding
II	11589612	AGATATGAAATATATATATAT	[A]	{AGATATGAAATATATATATAT, A}	0.0196078	1	FALSE	TRUE	FALSE	0.0388274	51	0	1	50	A	intron_variant	MODIFIER	F07A11.1	WBGene00008545	transcript	F07A11.1	protein_coding
II	11589613	GATATGAAATATATATATATA	[G]	{G, GATATGAAATATATATATATA}	0.15	1	FALSE	TRUE	FALSE	0.257143	60	0	9	51	G	intron_variant	MODIFIER	F07A11.1	WBGene00008545	transcript	F07A11.1	protein_coding
II	11589824	A	[G]	{G, A}	0.0151515	1	TRUE	FALSE	TRUE	0.0300717	66	0	1	65	G	intron_variant	MODIFIER	F07A11.1	WBGene00008545	transcript	F07A11.1	protein_coding
II	11589887	G	[T]	{G, T}	0.545455	1	TRUE	FALSE	FALSE	0.499653	66	0	36	30	T	intron_variant	MODIFIER	F07A11.1	WBGene00008545	transcript	F07A11.1	protein_coding
II	11590216	A	[AAAGAACAT, ACAT]	{ACAT, A, AAAGAACAT}	0.439394	1	FALSE	TRUE	FALSE	0.496415	66	2	28	36	AAAGAACAT	intron_variant	MODIFIER	F07A11.1	WBGene00008545	transcript	F07A11.1	protein_coding
II	11590229	C	[A]	{C, A}	0.772727	1	TRUE	FALSE	FALSE	0.353921	66	0	51	15	A	intron_variant	MODIFIER	F07A11.1	WBGene00008545	transcript	F07A11.1	protein_coding
II	11590622	G	[A]	{G, A}	0.0151515	1	TRUE	FALSE	TRUE	0.0300717	66	0	1	65	A	intron_variant	MODIFIER	F07A11.1	WBGene00008545	transcript	F07A11.1	protein_coding
II	11590981	CTT	[C, CT]	{CTT, C, CT}	0.333333	1	FALSE	TRUE	FALSE	0.447837	66	0	22	44	C	intron_variant	MODIFIER	F07A11.1	WBGene00008545	transcript	F07A11.1	protein_coding
II	11591046	T	[A]	{A, T}	0.166667	1	TRUE	FALSE	FALSE	0.279898	66	0	11	55	A	intron_variant	MODIFIER	F07A11.1	WBGene00008545	transcript	F07A11.1	protein_coding
II	11591085	AAAACACAT	[A]	{AAAACACAT, A}	0.030303	1	FALSE	TRUE	FALSE	0.0592181	66	0	2	64	A	intron_variant	MODIFIER	F07A11.1	WBGene00008545	transcript	F07A11.1	protein_coding
II	11591187	G	[A]	{G, A}	0.0151515	1	TRUE	FALSE	TRUE	0.0300717	66	0	1	65	A	intron_variant	MODIFIER	F07A11.1	WBGene00008545	transcript	F07A11.1	protein_coding
II	11591381	A	[G]	{G, A}	0.0757576	1	TRUE	FALSE	TRUE	0.141106	66	0	5	61	G	intron_variant	MODIFIER	F07A11.1	WBGene00008545	transcript	F07A11.1	protein_coding
II	11591529	C	[T]	{C, T}	0.0151515	1	TRUE	FALSE	TRUE	0.0300717	66	0	1	65	T	intron_variant	MODIFIER	F07A11.1	WBGene00008545	transcript	F07A11.1	protein_coding
II	11591654	G	[T]	{G, T}	0.0757576	1	TRUE	FALSE	FALSE	0.141106	66	0	5	61	T	intron_variant	MODIFIER	F07A11.1	WBGene00008545	transcript	F07A11.1	protein_coding
II	11591706	A	[AGG, AG, AGGGGG, AGGGGGG, AGGGGGGG, AGGGG, AGGGGGGGG, AGGG, AGGGGGGGGGG, AGGGGGGGGG]	{AGGGGGGG, AGGGGGGGG, AGGG, AGGGGGG, AGGGG, AG, AGG, AGGGGG, A}	0.261538	1	FALSE	TRUE	FALSE	0.389267	65	4	15	46	AG	intron_variant	MODIFIER	F07A11.1	WBGene00008545	transcript	F07A11.1	protein_coding
II	11591754	A	[C]	{C, A}	0.0151515	1	TRUE	FALSE	FALSE	0.0300717	66	0	1	65	C	intron_variant	MODIFIER	F07A11.1	WBGene00008545	transcript	F07A11.1	protein_coding
II	11591782	GT	[G]	{G, GT}	0.272727	1	FALSE	TRUE	FALSE	0.399722	66	0	18	48	G	intron_variant	MODIFIER	F07A11.1	WBGene00008545	transcript	F07A11.1	protein_coding
II	11591875	G	[A]	{G, A}	0.454545	1	TRUE	FALSE	TRUE	0.499653	66	0	30	36	A	intron_variant	MODIFIER	F07A11.1	WBGene00008545	transcript	F07A11.1	protein_coding
II	11591950	C	[T]	{C, T}	0.0151515	1	TRUE	FALSE	TRUE	0.0300717	66	0	1	65	T	intron_variant	MODIFIER	F07A11.1	WBGene00008545	transcript	F07A11.1	protein_coding
II	11591979	G	[A]	{G, A}	0.0151515	1	TRUE	FALSE	TRUE	0.0300717	66	0	1	65	A	intron_variant	MODIFIER	F07A11.1	WBGene00008545	transcript	F07A11.1	protein_coding
II	11592445	A	[G]	{G, A}	0.0757576	1	TRUE	FALSE	TRUE	0.141106	66	0	5	61	G	3_prime_UTR_variant	MODIFIER	gfat-1	WBGene00008546	transcript	F07A11.2a.1	protein_coding
II	11592534	G	[A]	{G, A}	0.030303	1	TRUE	FALSE	TRUE	0.0592181	66	0	2	64	A	3_prime_UTR_variant	MODIFIER	gfat-1	WBGene00008546	transcript	F07A11.2a.1	protein_coding
II	11592548	C	[T]	{C, T}	0.0151515	1	TRUE	FALSE	TRUE	0.0300717	66	0	1	65	T	3_prime_UTR_variant	MODIFIER	gfat-1	WBGene00008546	transcript	F07A11.2a.1	protein_coding
II	11592624	CAAGA	[C]	{C, CAAGA}	0.0151515	1	FALSE	TRUE	FALSE	0.0300717	66	0	1	65	C	intron_variant	MODIFIER	gfat-1	WBGene00008546	transcript	F07A11.2a.1	protein_coding
II	11592641	T	[A]	{A, T}	0.0151515	1	TRUE	FALSE	FALSE	0.0300717	66	0	1	65	A	intron_variant	MODIFIER	gfat-1	WBGene00008546	transcript	F07A11.2a.1	protein_coding
II	11594132	T	[C]	{C, T}	0.151515	1	TRUE	FALSE	TRUE	0.259079	66	0	10	56	C	intron_variant	MODIFIER	gfat-1	WBGene00008546	transcript	F07A11.2a.1	protein_coding
II	11594400	A	[T]	{A, T}	0.0151515	1	TRUE	FALSE	FALSE	0.0300717	66	0	1	65	T	intron_variant	MODIFIER	gfat-1	WBGene00008546	transcript	F07A11.2a.1	protein_coding
II	11594489	TA	[T]	{TA, T}	0.151515	1	FALSE	TRUE	FALSE	0.259079	66	0	10	56	T	intron_variant	MODIFIER	gfat-1	WBGene00008546	transcript	F07A11.2a.1	protein_coding
II	11594658	T	[A]	{A, T}	0.272727	1	TRUE	FALSE	FALSE	0.399722	66	0	18	48	A	intron_variant	MODIFIER	gfat-1	WBGene00008546	transcript	F07A11.2a.1	protein_coding
II	11594679	A	[T]	{A, T}	0.166667	1	TRUE	FALSE	FALSE	0.279898	66	0	11	55	T	intron_variant	MODIFIER	gfat-1	WBGene00008546	transcript	F07A11.2a.1	protein_coding
II	11595509	C	[A]	{C, A}	0.893939	1	TRUE	FALSE	FALSE	0.191071	66	0	59	7	A	intron_variant	MODIFIER	gfat-1	WBGene00008546	transcript	F07A11.2a.1	protein_coding
II	11595591	T	[C]	{C, T}	0.0757576	1	TRUE	FALSE	TRUE	0.141106	66	0	5	61	C	intron_variant	MODIFIER	gfat-1	WBGene00008546	transcript	F07A11.2a.1	protein_coding
II	11595613	TCCTC	[T]	{TCCTC, T}	0.0151515	1	FALSE	TRUE	FALSE	0.0300717	66	0	1	65	T	intron_variant	MODIFIER	gfat-1	WBGene00008546	transcript	F07A11.2a.1	protein_coding
II	11595616	TCCCG	[T]	{TCCCG, T}	0.0151515	1	FALSE	TRUE	FALSE	0.0300717	66	0	1	65	T	intron_variant	MODIFIER	gfat-1	WBGene00008546	transcript	F07A11.2a.1	protein_coding
II	11595714	G	[A]	{G, A}	0.0151515	1	TRUE	FALSE	TRUE	0.0300717	66	0	1	65	A	intron_variant	MODIFIER	gfat-1	WBGene00008546	transcript	F07A11.2a.1	protein_coding
II	11595778	A	[T]	{A, T}	0.0454545	1	TRUE	FALSE	FALSE	0.0874393	66	0	3	63	T	intron_variant	MODIFIER	gfat-1	WBGene00008546	transcript	F07A11.2a.1	protein_coding
II	11595890	T	[C]	{C, T}	0.0454545	1	TRUE	FALSE	TRUE	0.0874393	66	0	3	63	C	intron_variant	MODIFIER	gfat-1	WBGene00008546	transcript	F07A11.2a.1	protein_coding
II	11596205	A	[T]	{A, T}	0.0757576	1	TRUE	FALSE	FALSE	0.141106	66	0	5	61	T	intron_variant	MODIFIER	gfat-1	WBGene00008546	transcript	F07A11.2a.1	protein_coding
II	11596272	A	[C]	{C, A}	0.0454545	1	TRUE	FALSE	FALSE	0.0874393	66	0	3	63	C	intron_variant	MODIFIER	gfat-1	WBGene00008546	transcript	F07A11.2a.1	protein_coding
II	11596334	G	[A]	{G, A}	0.0151515	1	TRUE	FALSE	TRUE	0.0300717	66	0	1	65	A	intron_variant	MODIFIER	gfat-1	WBGene00008546	transcript	F07A11.2a.1	protein_coding
II	11596337	T	[C]	{C, T}	0.848485	1	TRUE	FALSE	TRUE	0.259079	66	0	56	10	C	intron_variant	MODIFIER	gfat-1	WBGene00008546	transcript	F07A11.2a.1	protein_coding
II	11596350	C	[T]	{C, T}	0.0151515	1	TRUE	FALSE	TRUE	0.0300717	66	0	1	65	T	intron_variant	MODIFIER	gfat-1	WBGene00008546	transcript	F07A11.2a.1	protein_coding
II	11596438	T	[C]	{C, T}	0.0454545	1	TRUE	FALSE	TRUE	0.0874393	66	0	3	63	C	5_prime_UTR_variant	MODIFIER	gfat-1	WBGene00008546	transcript	F07A11.2a.1	protein_coding
II	11596503	C	[T]	{C, T}	0.0151515	1	TRUE	FALSE	TRUE	0.0300717	66	0	1	65	T	5_prime_UTR_variant	MODIFIER	gfat-1	WBGene00008546	transcript	F07A11.2a.1	protein_coding
II	11596838	TAA	[T]	{TAA, T}	0.0151515	1	FALSE	TRUE	FALSE	0.0300717	66	0	1	65	T	3_prime_UTR_variant	MODIFIER	npp-5	WBGene00003791	transcript	F07A11.3	protein_coding
II	11596839	A	[T]	{A, T}	0.846154	1	TRUE	FALSE	FALSE	0.262373	65	0	55	10	T	3_prime_UTR_variant	MODIFIER	npp-5	WBGene00003791	transcript	F07A11.3	protein_coding
II	11596880	T	[C]	{C, T}	0.0151515	1	TRUE	FALSE	TRUE	0.0300717	66	0	1	65	C	3_prime_UTR_variant	MODIFIER	npp-5	WBGene00003791	transcript	F07A11.3	protein_coding
II	11596903	CA	[C]	{C, CA}	0.0151515	1	FALSE	TRUE	FALSE	0.0300717	66	0	1	65	C	3_prime_UTR_variant	MODIFIER	npp-5	WBGene00003791	transcript	F07A11.3	protein_coding
II	11596911	C	[T]	{C, T}	0.848485	1	TRUE	FALSE	TRUE	0.259079	66	0	56	10	T	3_prime_UTR_variant	MODIFIER	npp-5	WBGene00003791	transcript	F07A11.3	protein_coding
II	11597239	T	[A]	{A, T}	0.181818	1	TRUE	FALSE	FALSE	0.299792	66	0	12	54	A	intron_variant	MODIFIER	npp-5	WBGene00003791	transcript	F07A11.3	protein_coding
II	11597243	A	[T]	{A, T}	0.0153846	1	TRUE	FALSE	FALSE	0.0305307	65	0	1	64	T	intron_variant	MODIFIER	npp-5	WBGene00003791	transcript	F07A11.3	protein_coding
II	11597533	C	[T]	{C, T}	0.0615385	1	TRUE	FALSE	TRUE	0.116398	65	0	4	61	T	intron_variant	MODIFIER	npp-5	WBGene00003791	transcript	F07A11.3	protein_coding
II	11597541	A	[G]	{G, A}	0.0153846	1	TRUE	FALSE	TRUE	0.0305307	65	0	1	64	G	intron_variant	MODIFIER	npp-5	WBGene00003791	transcript	F07A11.3	protein_coding
II	11598172	T	[A]	{A, T}	0.109375	1	TRUE	FALSE	FALSE	0.196358	64	0	7	57	A	intron_variant	MODIFIER	npp-5	WBGene00003791	transcript	F07A11.3	protein_coding
II	11598173	A	[T]	{A, T}	0.03125	1	TRUE	FALSE	FALSE	0.0610236	64	0	2	62	T	intron_variant	MODIFIER	npp-5	WBGene00003791	transcript	F07A11.3	protein_coding
II	11598179	C	[T]	{C, T}	0.078125	1	TRUE	FALSE	TRUE	0.145177	64	0	5	59	T	intron_variant	MODIFIER	npp-5	WBGene00003791	transcript	F07A11.3	protein_coding
II	11599263	T	[G]	{G, T}	0.0757576	1	TRUE	FALSE	FALSE	0.141106	66	0	5	61	G	intron_variant	MODIFIER	npp-5	WBGene00003791	transcript	F07A11.3	protein_coding
II	11599264	C	[A]	{C, A}	0.0151515	1	TRUE	FALSE	FALSE	0.0300717	66	0	1	65	A	intron_variant	MODIFIER	npp-5	WBGene00003791	transcript	F07A11.3	protein_coding
II	11599510	C	[T]	{C, T}	0.0757576	1	TRUE	FALSE	TRUE	0.141106	66	0	5	61	T	intron_variant	MODIFIER	npp-5	WBGene00003791	transcript	F07A11.3	protein_coding
II	11599511	C	[A, T]	{C, A}	0.0757576	1	TRUE	FALSE	FALSE	0.141106	66	0	5	61	A	intron_variant	MODIFIER	npp-5	WBGene00003791	transcript	F07A11.3	protein_coding
II	11599657	A	[AT]	{AT, A}	0.0454545	1	FALSE	TRUE	FALSE	0.0874393	66	0	3	63	AT	intron_variant	MODIFIER	npp-5	WBGene00003791	transcript	F07A11.3	protein_coding
II	11604110	C	[A]	{C, A}	0.0151515	1	TRUE	FALSE	FALSE	0.0300717	66	0	1	65	A	intron_variant	MODIFIER	F07A11.4	WBGene00008547	transcript	F07A11.4a	protein_coding
II	11604142	C	[T]	{C, T}	0.0151515	1	TRUE	FALSE	TRUE	0.0300717	66	0	1	65	T	intron_variant	MODIFIER	F07A11.4	WBGene00008547	transcript	F07A11.4a	protein_coding
II	11604244	T	[C]	{C, T}	0.0757576	1	TRUE	FALSE	TRUE	0.141106	66	0	5	61	C	intron_variant	MODIFIER	F07A11.4	WBGene00008547	transcript	F07A11.4a	protein_coding
II	11604271	AATT	[A]	{AATT, A}	0.0151515	1	FALSE	TRUE	FALSE	0.0300717	66	0	1	65	A	intron_variant	MODIFIER	F07A11.4	WBGene00008547	transcript	F07A11.4a	protein_coding
II	11604316	T	[C]	{C, T}	0.0151515	1	TRUE	FALSE	TRUE	0.0300717	66	0	1	65	C	intron_variant	MODIFIER	F07A11.4	WBGene00008547	transcript	F07A11.4a	protein_coding
II	11604448	T	[A]	{A, T}	0.0151515	1	TRUE	FALSE	FALSE	0.0300717	66	0	1	65	A	intron_variant	MODIFIER	F07A11.4	WBGene00008547	transcript	F07A11.4a	protein_coding
II	11604449	A	[T]	{A, T}	0.151515	1	TRUE	FALSE	FALSE	0.259079	66	0	10	56	T	intron_variant	MODIFIER	F07A11.4	WBGene00008547	transcript	F07A11.4a	protein_coding
II	11604479	A	[T]	{A, T}	0.0151515	1	TRUE	FALSE	FALSE	0.0300717	66	0	1	65	T	intron_variant	MODIFIER	F07A11.4	WBGene00008547	transcript	F07A11.4a	protein_coding
II	11604484	G	[GT]	{G, GT}	0.0151515	1	FALSE	TRUE	FALSE	0.0300717	66	0	1	65	GT	intron_variant	MODIFIER	F07A11.4	WBGene00008547	transcript	F07A11.4a	protein_coding
II	11604521	A	[C]	{C, A}	0.0151515	1	TRUE	FALSE	FALSE	0.0300717	66	0	1	65	C	intron_variant	MODIFIER	F07A11.4	WBGene00008547	transcript	F07A11.4a	protein_coding
II	11604533	G	[C]	{C, G}	0.0151515	1	TRUE	FALSE	FALSE	0.0300717	66	0	1	65	C	intron_variant	MODIFIER	F07A11.4	WBGene00008547	transcript	F07A11.4a	protein_coding
II	11604580	T	[C]	{C, T}	0.893939	1	TRUE	FALSE	TRUE	0.191071	66	0	59	7	C	intron_variant	MODIFIER	F07A11.4	WBGene00008547	transcript	F07A11.4a	protein_coding
II	11604714	C	[T]	{C, T}	0.0151515	1	TRUE	FALSE	TRUE	0.0300717	66	0	1	65	T	intron_variant	MODIFIER	F07A11.4	WBGene00008547	transcript	F07A11.4a	protein_coding
II	11604717	CATTAA	[C]	{C, CATTAA}	0.0151515	1	FALSE	TRUE	FALSE	0.0300717	66	0	1	65	C	intron_variant	MODIFIER	F07A11.4	WBGene00008547	transcript	F07A11.4a	protein_coding
II	11604748	A	[T]	{A, T}	0.0151515	1	TRUE	FALSE	FALSE	0.0300717	66	0	1	65	T	intron_variant	MODIFIER	F07A11.4	WBGene00008547	transcript	F07A11.4a	protein_coding
II	11604801	T	[C]	{C, T}	0.287879	1	TRUE	FALSE	TRUE	0.413139	66	0	19	47	C	intron_variant	MODIFIER	F07A11.4	WBGene00008547	transcript	F07A11.4a	protein_coding
II	11604837	C	[T]	{C, T}	0.409091	1	TRUE	FALSE	TRUE	0.487162	66	0	27	39	T	intron_variant	MODIFIER	F07A11.4	WBGene00008547	transcript	F07A11.4a	protein_coding
II	11604867	T	[C]	{C, T}	0.181818	1	TRUE	FALSE	TRUE	0.299792	66	0	12	54	C	intron_variant	MODIFIER	F07A11.4	WBGene00008547	transcript	F07A11.4a	protein_coding
II	11604871	T	[C]	{C, T}	0.848485	1	TRUE	FALSE	TRUE	0.259079	66	0	56	10	C	intron_variant	MODIFIER	F07A11.4	WBGene00008547	transcript	F07A11.4a	protein_coding
II	11605143	T	[C, A]	{C, A, T}	0.181818	1	TRUE	FALSE	FALSE	0.299792	66	0	12	54	A	intron_variant	MODIFIER	F07A11.4	WBGene00008547	transcript	F07A11.4a	protein_coding
II	11605211	CT	[C]	{C, CT}	0.136364	1	FALSE	TRUE	FALSE	0.237335	66	0	9	57	C	intron_variant	MODIFIER	F07A11.4	WBGene00008547	transcript	F07A11.4a	protein_coding
II	11605239	CT	[C]	{CT, C}	0.166667	1	FALSE	TRUE	FALSE	0.279898	66	0	11	55	C	intron_variant	MODIFIER	F07A11.4	WBGene00008547	transcript	F07A11.4a	protein_coding
II	11605243	T	[C]	{C, T}	0.0163934	1	TRUE	FALSE	TRUE	0.0325159	61	0	1	60	C	intron_variant	MODIFIER	F07A11.4	WBGene00008547	transcript	F07A11.4a	protein_coding
II	11605320	A	[T]	{A, T}	0.0757576	1	TRUE	FALSE	FALSE	0.141106	66	0	5	61	T	intron_variant	MODIFIER	F07A11.4	WBGene00008547	transcript	F07A11.4a	protein_coding
II	11605340	C	[T]	{C, T}	0.166667	1	TRUE	FALSE	TRUE	0.279898	66	0	11	55	T	intron_variant	MODIFIER	F07A11.4	WBGene00008547	transcript	F07A11.4a	protein_coding
II	11605354	C	[T]	{C, T}	0.0151515	1	TRUE	FALSE	TRUE	0.0300717	66	0	1	65	T	intron_variant	MODIFIER	F07A11.4	WBGene00008547	transcript	F07A11.4a	protein_coding
II	11605361	A	[T]	{A, T}	0.893939	1	TRUE	FALSE	FALSE	0.191071	66	0	59	7	T	intron_variant	MODIFIER	F07A11.4	WBGene00008547	transcript	F07A11.4a	protein_coding
II	11605373	GT	[GTT, GTTT, G]	{GTT, GT}	0.424242	1	FALSE	TRUE	FALSE	0.492251	66	0	28	38	G	intron_variant	MODIFIER	F07A11.4	WBGene00008547	transcript	F07A11.4a	protein_coding
II	11605425	AT	[A]	{AT, A}	0.0151515	1	FALSE	TRUE	FALSE	0.0300717	66	0	1	65	A	intron_variant	MODIFIER	F07A11.4	WBGene00008547	transcript	F07A11.4a	protein_coding
II	11605445	A	[T]	{A, T}	0.393939	1	TRUE	FALSE	FALSE	0.481147	66	0	26	40	T	intron_variant	MODIFIER	F07A11.4	WBGene00008547	transcript	F07A11.4a	protein_coding
II	11605446	A	[T]	{A, T}	0.353846	1	TRUE	FALSE	FALSE	0.460823	65	0	23	42	T	intron_variant	MODIFIER	F07A11.4	WBGene00008547	transcript	F07A11.4a	protein_coding
II	11605473	A	[G]	{G, A}	0.153846	1	TRUE	FALSE	TRUE	0.262373	65	0	10	55	G	intron_variant	MODIFIER	F07A11.4	WBGene00008547	transcript	F07A11.4a	protein_coding
II	11605533	G	[T]	{G, T}	0.0151515	1	TRUE	FALSE	FALSE	0.0300717	66	0	1	65	T	intron_variant	MODIFIER	F07A11.4	WBGene00008547	transcript	F07A11.4a	protein_coding
II	11605545	TAA	[TA, TAAA, T]	{TAA, TA, TAAA, T}	0.363636	1	FALSE	TRUE	FALSE	0.466343	66	0	24	42	T	intron_variant	MODIFIER	F07A11.4	WBGene00008547	transcript	F07A11.4a	protein_coding
II	11605546	A	[T]	{A, T}	0.295082	1	TRUE	FALSE	FALSE	0.419455	61	0	18	43	T	intron_variant	MODIFIER	F07A11.4	WBGene00008547	transcript	F07A11.4a	protein_coding
II	11605547	A	[T]	{A, T}	0.266667	1	TRUE	FALSE	FALSE	0.394398	60	0	16	44	T	intron_variant	MODIFIER	F07A11.4	WBGene00008547	transcript	F07A11.4a	protein_coding
II	11605548	A	[T]	{A, T}	0.0793651	1	TRUE	FALSE	FALSE	0.147302	63	0	5	58	T	intron_variant	MODIFIER	F07A11.4	WBGene00008547	transcript	F07A11.4a	protein_coding
II	11605608	T	[C]	{C, T}	0.0151515	1	TRUE	FALSE	TRUE	0.0300717	66	0	1	65	C	intron_variant	MODIFIER	F07A11.4	WBGene00008547	transcript	F07A11.4a	protein_coding
II	11605619	A	[G]	{G, A}	0.0151515	1	TRUE	FALSE	TRUE	0.0300717	66	0	1	65	G	intron_variant	MODIFIER	F07A11.4	WBGene00008547	transcript	F07A11.4a	protein_coding
II	11605649	A	[G]	{G, A}	0.0606061	1	TRUE	FALSE	TRUE	0.114735	66	0	4	62	G	intron_variant	MODIFIER	F07A11.4	WBGene00008547	transcript	F07A11.4a	protein_coding
II	11605693	T	[A]	{A, T}	0.0151515	1	TRUE	FALSE	FALSE	0.0300717	66	0	1	65	A	intron_variant	MODIFIER	F07A11.4	WBGene00008547	transcript	F07A11.4a	protein_coding
II	11606322	T	[TA]	{TA, T}	0.015625	1	FALSE	TRUE	FALSE	0.0310039	64	0	1	63	TA	intron_variant	MODIFIER	F07A11.4	WBGene00008547	transcript	F07A11.4a	protein_coding
II	11606326	T	[A]	{A, T}	0.0923077	1	TRUE	FALSE	FALSE	0.168873	65	0	6	59	A	intron_variant	MODIFIER	F07A11.4	WBGene00008547	transcript	F07A11.4a	protein_coding
II	11606326	T	[TA, TTA]	{TA, T}	0.0166667	1	FALSE	TRUE	FALSE	0.0330532	60	0	1	59	TA	intron_variant	MODIFIER	F07A11.4	WBGene00008547	transcript	F07A11.4a	protein_coding
II	11606360	T	[A]	{A, T}	0.257576	1	TRUE	FALSE	FALSE	0.385381	66	0	17	49	A	intron_variant	MODIFIER	F07A11.4	WBGene00008547	transcript	F07A11.4a	protein_coding
II	11606411	G	[GAA, GAAA, GA]	{G, GAA, GA}	0.401515	1	FALSE	TRUE	FALSE	0.48427	66	1	26	39	GA	intron_variant	MODIFIER	F07A11.4	WBGene00008547	transcript	F07A11.4a	protein_coding
II	11606509	G	[A]	{G, A}	0.0151515	1	TRUE	FALSE	TRUE	0.0300717	66	0	1	65	A	intron_variant	MODIFIER	F07A11.4	WBGene00008547	transcript	F07A11.4a	protein_coding
II	11606521	T	[C]	{C, T}	0.166667	1	TRUE	FALSE	TRUE	0.279898	66	0	11	55	C	intron_variant	MODIFIER	F07A11.4	WBGene00008547	transcript	F07A11.4a	protein_coding
II	11606639	G	[A]	{G, A}	0.0151515	1	TRUE	FALSE	TRUE	0.0300717	66	0	1	65	A	intron_variant	MODIFIER	F07A11.4	WBGene00008547	transcript	F07A11.4a	protein_coding
II	11606745	C	[A]	{C, A}	0.0757576	1	TRUE	FALSE	FALSE	0.141106	66	0	5	61	A	intron_variant	MODIFIER	F07A11.4	WBGene00008547	transcript	F07A11.4a	protein_coding
II	11606752	CA	[C]	{C, CA}	0.0151515	1	FALSE	TRUE	FALSE	0.0300717	66	0	1	65	C	intron_variant	MODIFIER	F07A11.4	WBGene00008547	transcript	F07A11.4a	protein_coding
II	11606768	A	[G]	{G, A}	0.0151515	1	TRUE	FALSE	TRUE	0.0300717	66	0	1	65	G	intron_variant	MODIFIER	F07A11.4	WBGene00008547	transcript	F07A11.4a	protein_coding
II	11606812	GA	[G]	{G, GA}	0.0757576	1	FALSE	TRUE	FALSE	0.141106	66	0	5	61	G	intron_variant	MODIFIER	F07A11.4	WBGene00008547	transcript	F07A11.4a	protein_coding
II	11606840	A	[T]	{A, T}	0.0151515	1	TRUE	FALSE	FALSE	0.0300717	66	0	1	65	T	intron_variant	MODIFIER	F07A11.4	WBGene00008547	transcript	F07A11.4a	protein_coding
II	11607496	A	[T]	{A, T}	0.0151515	1	TRUE	FALSE	FALSE	0.0300717	66	0	1	65	T	intron_variant	MODIFIER	F07A11.4	WBGene00008547	transcript	F07A11.4a	protein_coding
II	11608174	CT	[C]	{CT, C}	0.0151515	1	FALSE	TRUE	FALSE	0.0300717	66	0	1	65	C	intron_variant	MODIFIER	F07A11.4	WBGene00008547	transcript	F07A11.4a	protein_coding
II	11608177	T	[C]	{C, T}	0.174242	1	TRUE	FALSE	TRUE	0.289961	66	1	11	54	C	intron_variant	MODIFIER	F07A11.4	WBGene00008547	transcript	F07A11.4a	protein_coding
II	11608262	G	[A]	{G, A}	0.121212	1	TRUE	FALSE	TRUE	0.214666	66	0	8	58	A	intron_variant	MODIFIER	F07A11.4	WBGene00008547	transcript	F07A11.4a	protein_coding
II	11608278	C	[T]	{C, T}	0.136364	1	TRUE	FALSE	TRUE	0.237335	66	0	9	57	T	intron_variant	MODIFIER	F07A11.4	WBGene00008547	transcript	F07A11.4a	protein_coding
II	11608302	G	[A]	{G, A}	0.030303	1	TRUE	FALSE	TRUE	0.0592181	66	0	2	64	A	intron_variant	MODIFIER	F07A11.4	WBGene00008547	transcript	F07A11.4a	protein_coding
II	11608461	T	[C]	{C, T}	0.439394	1	TRUE	FALSE	TRUE	0.496415	66	0	29	37	C	intron_variant	MODIFIER	F07A11.4	WBGene00008547	transcript	F07A11.4a	protein_coding
II	11608522	T	[A]	{A, T}	0.0151515	1	TRUE	FALSE	FALSE	0.0300717	66	0	1	65	A	intron_variant	MODIFIER	F07A11.4	WBGene00008547	transcript	F07A11.4a	protein_coding
II	11608531	G	[T]	{G, T}	0.166667	1	TRUE	FALSE	FALSE	0.279898	66	0	11	55	T	intron_variant	MODIFIER	F07A11.4	WBGene00008547	transcript	F07A11.4a	protein_coding
II	11608553	G	[T]	{G, T}	0.0454545	1	TRUE	FALSE	FALSE	0.0874393	66	0	3	63	T	intron_variant	MODIFIER	F07A11.4	WBGene00008547	transcript	F07A11.4a	protein_coding
II	11609993	T	[TA, TAA]	{TAA, TA, T}	0.409091	1	FALSE	TRUE	FALSE	0.487162	66	0	27	39	TA	intron_variant	MODIFIER	F07A11.4	WBGene00008547	transcript	F07A11.4a	protein_coding
II	11610077	C	[A]	{C, A}	0.0151515	1	TRUE	FALSE	FALSE	0.0300717	66	0	1	65	A	intron_variant	MODIFIER	F07A11.4	WBGene00008547	transcript	F07A11.4a	protein_coding
II	11610551	C	[A]	{C, A}	0.409091	1	TRUE	FALSE	FALSE	0.487162	66	0	27	39	A	intron_variant	MODIFIER	F07A11.4	WBGene00008547	transcript	F07A11.4a	protein_coding
II	11610691	TGGATAA	[T]	{TGGATAA, T}	0.0757576	1	FALSE	TRUE	FALSE	0.141106	66	0	5	61	T	intron_variant	MODIFIER	F07A11.4	WBGene00008547	transcript	F07A11.4a	protein_coding
II	11610758	A	[G]	{G, A}	0.0151515	1	TRUE	FALSE	TRUE	0.0300717	66	0	1	65	G	intron_variant	MODIFIER	F07A11.4	WBGene00008547	transcript	F07A11.4a	protein_coding
II	11610782	G	[A]	{G, A}	0.0757576	1	TRUE	FALSE	TRUE	0.141106	66	0	5	61	A	intron_variant	MODIFIER	F07A11.4	WBGene00008547	transcript	F07A11.4a	protein_coding
II	11610783	C	[T]	{C, T}	0.0909091	1	TRUE	FALSE	TRUE	0.166551	66	0	6	60	T	intron_variant	MODIFIER	F07A11.4	WBGene00008547	transcript	F07A11.4a	protein_coding
II	11610840	T	[C]	{C, T}	0.0151515	1	TRUE	FALSE	TRUE	0.0300717	66	0	1	65	C	intron_variant	MODIFIER	F07A11.4	WBGene00008547	transcript	F07A11.4a	protein_coding
II	11610842	T	[G]	{G, T}	0.0151515	1	TRUE	FALSE	FALSE	0.0300717	66	0	1	65	G	intron_variant	MODIFIER	F07A11.4	WBGene00008547	transcript	F07A11.4a	protein_coding
II	11610869	G	[GT]	{G, GT}	0.792308	1	FALSE	TRUE	FALSE	0.331664	65	3	50	12	GT	intron_variant	MODIFIER	F07A11.4	WBGene00008547	transcript	F07A11.4a	protein_coding
II	11610881	C	[T]	{C, T}	0.409091	1	TRUE	FALSE	TRUE	0.487162	66	0	27	39	T	intron_variant	MODIFIER	F07A11.4	WBGene00008547	transcript	F07A11.4a	protein_coding
II	11610885	TA	[T]	{TA, T}	0.0833333	1	FALSE	TRUE	FALSE	0.153944	66	3	4	59	T	intron_variant	MODIFIER	F07A11.4	WBGene00008547	transcript	F07A11.4a	protein_coding
II	11610894	A	[T]	{A, T}	0.409091	1	TRUE	FALSE	FALSE	0.487162	66	0	27	39	T	intron_variant	MODIFIER	F07A11.4	WBGene00008547	transcript	F07A11.4a	protein_coding
II	11610995	GT	[G]	{G, GT}	0.0151515	1	FALSE	TRUE	FALSE	0.0300717	66	0	1	65	G	intron_variant	MODIFIER	F07A11.4	WBGene00008547	transcript	F07A11.4a	protein_coding
II	11610996	TA	[T]	{TA, T}	0.0909091	1	FALSE	TRUE	FALSE	0.166551	66	0	6	60	T	intron_variant	MODIFIER	F07A11.4	WBGene00008547	transcript	F07A11.4a	protein_coding
II	11611058	T	[C]	{C, T}	0.0151515	1	TRUE	FALSE	TRUE	0.0300717	66	0	1	65	C	intron_variant	MODIFIER	F07A11.4	WBGene00008547	transcript	F07A11.4a	protein_coding
II	11611081	A	[AAAATT]	{AAAATT, A}	0.0606061	1	FALSE	TRUE	FALSE	0.114735	66	0	4	62	AAAATT	intron_variant	MODIFIER	F07A11.4	WBGene00008547	transcript	F07A11.4a	protein_coding
II	11611101	G	[A]	{G, A}	0.0909091	1	TRUE	FALSE	TRUE	0.166551	66	0	6	60	A	intron_variant	MODIFIER	F07A11.4	WBGene00008547	transcript	F07A11.4a	protein_coding
II	11611105	GT	[G]	{G, GT}	0.0909091	1	FALSE	TRUE	FALSE	0.166551	66	0	6	60	G	intron_variant	MODIFIER	F07A11.4	WBGene00008547	transcript	F07A11.4a	protein_coding
II	11611124	T	[C]	{C, T}	0.0151515	1	TRUE	FALSE	TRUE	0.0300717	66	0	1	65	C	intron_variant	MODIFIER	F07A11.4	WBGene00008547	transcript	F07A11.4a	protein_coding
II	11611159	AGTT	[A, AT]	{AGTT, A}	0.0538462	1	FALSE	TRUE	FALSE	0.102683	65	1	3	61	AT	intron_variant	MODIFIER	F07A11.4	WBGene00008547	transcript	F07A11.4a	protein_coding
II	11611160	GTTTT	[GT, GTT, GTTTTTTT, GTTT, G]	{GTTTTTTT, GTTT, GTT, GT, GTTTT}	0.430769	1	FALSE	TRUE	FALSE	0.494216	65	6	25	34	G	intron_variant	MODIFIER	F07A11.4	WBGene00008547	transcript	F07A11.4a	protein_coding
II	11611173	TTTA	[T]	{TTTA, T}	0.0350877	1	FALSE	TRUE	FALSE	0.0683124	57	0	2	55	T	intron_variant	MODIFIER	F07A11.4	WBGene00008547	transcript	F07A11.4a	protein_coding
II	11611176	A	[T]	{A, T}	0.0307692	1	TRUE	FALSE	FALSE	0.0601073	65	0	2	63	T	intron_variant	MODIFIER	F07A11.4	WBGene00008547	transcript	F07A11.4a	protein_coding
II	11611203	G	[C]	{C, G}	0.0909091	1	TRUE	FALSE	FALSE	0.166551	66	0	6	60	C	intron_variant	MODIFIER	F07A11.4	WBGene00008547	transcript	F07A11.4a	protein_coding
II	11611221	T	[C]	{C, T}	0.166667	1	TRUE	FALSE	TRUE	0.279898	66	0	11	55	C	intron_variant	MODIFIER	F07A11.4	WBGene00008547	transcript	F07A11.4a	protein_coding
II	11611239	G	[C]	{C, G}	0.0757576	1	TRUE	FALSE	FALSE	0.141106	66	0	5	61	C	intron_variant	MODIFIER	F07A11.4	WBGene00008547	transcript	F07A11.4a	protein_coding
II	11611309	AT	[A]	{AT, A}	0.0151515	1	FALSE	TRUE	FALSE	0.0300717	66	0	1	65	A	3_prime_UTR_variant	MODIFIER	F07A11.4	WBGene00008547	transcript	F07A11.4a	protein_coding
II	11611335	C	[A]	{C, A}	0.030303	1	TRUE	FALSE	FALSE	0.0592181	66	0	2	64	A	3_prime_UTR_variant	MODIFIER	F07A11.4	WBGene00008547	transcript	F07A11.4a	protein_coding
II	11611337	AT	[ATTT, A, ATT]	{ATT, AT, ATTT, A}	0.204545	1	FALSE	TRUE	FALSE	0.327897	66	1	13	52	A	3_prime_UTR_variant	MODIFIER	F07A11.4	WBGene00008547	transcript	F07A11.4a	protein_coding
II	11611376	T	[C]	{C, T}	0.0151515	1	TRUE	FALSE	TRUE	0.0300717	66	0	1	65	C	3_prime_UTR_variant	MODIFIER	F07A11.4	WBGene00008547	transcript	F07A11.4a	protein_coding
II	11611404	T	[A]	{A, T}	0.0757576	1	TRUE	FALSE	FALSE	0.141106	66	0	5	61	A	3_prime_UTR_variant	MODIFIER	F07A11.4	WBGene00008547	transcript	F07A11.4a	protein_coding
II	11611441	A	[G]	{G, A}	0.0151515	1	TRUE	FALSE	TRUE	0.0300717	66	0	1	65	G	3_prime_UTR_variant	MODIFIER	F07A11.4	WBGene00008547	transcript	F07A11.4a	protein_coding
II	11611448	T	[A]	{A, T}	0.181818	1	TRUE	FALSE	FALSE	0.299792	66	0	12	54	A	3_prime_UTR_variant	MODIFIER	F07A11.4	WBGene00008547	transcript	F07A11.4a	protein_coding
II	11611503	G	[GTT, GTTT]	{G, GTTT, GTT}	0.0909091	1	FALSE	TRUE	FALSE	0.166551	66	2	5	59	GTT	3_prime_UTR_variant	MODIFIER	F07A11.4	WBGene00008547	transcript	F07A11.4a	protein_coding
II	11611512	T	[TTG, TG, TTTG, TTTTG]	{TTG, TG, TTTG, T}	0.848485	1	FALSE	TRUE	FALSE	0.259079	66	0	56	10	TG	3_prime_UTR_variant	MODIFIER	F07A11.4	WBGene00008547	transcript	F07A11.4a	protein_coding
II	11611513	T	[TGG, TGC, TTGG, TGA, TTTGG, TTTG]	{TGC, TGG, TTGG, T}	0.155172	1	FALSE	TRUE	FALSE	0.264468	58	0	9	49	TTGG	3_prime_UTR_variant	MODIFIER	F07A11.4	WBGene00008547	transcript	F07A11.4a	protein_coding
II	11611514	G	[GTT, GTA, GTC]	{G, GTT}	0.078125	1	FALSE	TRUE	FALSE	0.145177	64	0	5	59	GTA	3_prime_UTR_variant	MODIFIER	F07A11.4	WBGene00008547	transcript	F07A11.4a	protein_coding
II	11611515	T	[TGA, TGG]	{TGA, TGG, T}	0.0625	1	FALSE	TRUE	FALSE	0.11811	64	0	4	60	TGA	3_prime_UTR_variant	MODIFIER	F07A11.4	WBGene00008547	transcript	F07A11.4a	protein_coding
II	11612315	A	[AT]	{AT, A}	0.030303	1	FALSE	TRUE	FALSE	0.0592181	66	0	2	64	AT	5_prime_UTR_variant	MODIFIER	F07A11.5	WBGene00008548	transcript	F07A11.5	protein_coding
II	11612317	T	[TA]	{TA, T}	0.030303	1	FALSE	TRUE	FALSE	0.0592181	66	0	2	64	TA	5_prime_UTR_variant	MODIFIER	F07A11.5	WBGene00008548	transcript	F07A11.5	protein_coding
II	11612323	A	[G]	{G, A}	0.0151515	1	TRUE	FALSE	TRUE	0.0300717	66	0	1	65	G	5_prime_UTR_variant	MODIFIER	F07A11.5	WBGene00008548	transcript	F07A11.5	protein_coding
II	11612408	T	[A]	{A, T}	0.0151515	1	TRUE	FALSE	FALSE	0.0300717	66	0	1	65	A	intron_variant	MODIFIER	F07A11.5	WBGene00008548	transcript	F07A11.5	protein_coding
II	11612409	A	[T]	{A, T}	0.151515	1	TRUE	FALSE	FALSE	0.259079	66	0	10	56	T	intron_variant	MODIFIER	F07A11.5	WBGene00008548	transcript	F07A11.5	protein_coding
II	11612961	C	[T]	{C, T}	0.0151515	1	TRUE	FALSE	TRUE	0.0300717	66	0	1	65	T	intron_variant	MODIFIER	F07A11.5	WBGene00008548	transcript	F07A11.5	protein_coding
II	11613015	G	[A]	{G, A}	0.0151515	1	TRUE	FALSE	TRUE	0.0300717	66	0	1	65	A	intron_variant	MODIFIER	F07A11.5	WBGene00008548	transcript	F07A11.5	protein_coding
II	11613024	A	[T]	{A, T}	0.0151515	1	TRUE	FALSE	FALSE	0.0300717	66	0	1	65	T	intron_variant	MODIFIER	F07A11.5	WBGene00008548	transcript	F07A11.5	protein_coding
II	11613046	G	[A]	{G, A}	0.166667	1	TRUE	FALSE	TRUE	0.279898	66	0	11	55	A	intron_variant	MODIFIER	F07A11.5	WBGene00008548	transcript	F07A11.5	protein_coding
II	11613145	GA	[G]	{G, GA}	0.0606061	1	FALSE	TRUE	FALSE	0.114735	66	0	4	62	G	intron_variant	MODIFIER	F07A11.5	WBGene00008548	transcript	F07A11.5	protein_coding
II	11613207	G	[A]	{G, A}	0.151515	1	TRUE	FALSE	TRUE	0.259079	66	0	10	56	A	intron_variant	MODIFIER	F07A11.5	WBGene00008548	transcript	F07A11.5	protein_coding
II	11613242	A	[G]	{G, A}	0.030303	1	TRUE	FALSE	TRUE	0.0592181	66	0	2	64	G	intron_variant	MODIFIER	F07A11.5	WBGene00008548	transcript	F07A11.5	protein_coding
II	11613818	A	[G]	{G, A}	0.893939	1	TRUE	FALSE	TRUE	0.191071	66	0	59	7	G	intron_variant	MODIFIER	F07A11.5	WBGene00008548	transcript	F07A11.5	protein_coding
II	11613925	A	[T]	{A, T}	0.0151515	1	TRUE	FALSE	FALSE	0.0300717	66	0	1	65	T	intron_variant	MODIFIER	F07A11.5	WBGene00008548	transcript	F07A11.5	protein_coding
II	11613933	A	[C]	{C, A}	0.0151515	1	TRUE	FALSE	FALSE	0.0300717	66	0	1	65	C	intron_variant	MODIFIER	F07A11.5	WBGene00008548	transcript	F07A11.5	protein_coding
II	11613944	G	[A]	{G, A}	0.0151515	1	TRUE	FALSE	TRUE	0.0300717	66	0	1	65	A	intron_variant	MODIFIER	F07A11.5	WBGene00008548	transcript	F07A11.5	protein_coding
II	11613976	C	[T]	{C, T}	0.166667	1	TRUE	FALSE	TRUE	0.279898	66	0	11	55	T	intron_variant	MODIFIER	F07A11.5	WBGene00008548	transcript	F07A11.5	protein_coding
II	11614035	TA	[T]	{TA, T}	0.0757576	1	FALSE	TRUE	FALSE	0.141106	66	0	5	61	T	intron_variant	MODIFIER	F07A11.5	WBGene00008548	transcript	F07A11.5	protein_coding
II	11614045	C	[A]	{C, A}	0.0757576	1	TRUE	FALSE	FALSE	0.141106	66	0	5	61	A	intron_variant	MODIFIER	F07A11.5	WBGene00008548	transcript	F07A11.5	protein_coding
II	11614076	T	[C]	{C, T}	0.0151515	1	TRUE	FALSE	TRUE	0.0300717	66	0	1	65	C	intron_variant	MODIFIER	F07A11.5	WBGene00008548	transcript	F07A11.5	protein_coding
II	11614079	C	[T]	{C, T}	0.0757576	1	TRUE	FALSE	TRUE	0.141106	66	0	5	61	T	intron_variant	MODIFIER	F07A11.5	WBGene00008548	transcript	F07A11.5	protein_coding
II	11614331	A	[T]	{A, T}	0.0151515	1	TRUE	FALSE	FALSE	0.0300717	66	0	1	65	T	3_prime_UTR_variant	MODIFIER	F07A11.5	WBGene00008548	transcript	F07A11.5	protein_coding
II	11614370	T	[C]	{C, T}	0.0151515	1	TRUE	FALSE	TRUE	0.0300717	66	0	1	65	C	3_prime_UTR_variant	MODIFIER	F07A11.5	WBGene00008548	transcript	F07A11.5	protein_coding
II	11614385	G	[T]	{G, T}	0.0151515	1	TRUE	FALSE	FALSE	0.0300717	66	0	1	65	T	3_prime_UTR_variant	MODIFIER	F07A11.5	WBGene00008548	transcript	F07A11.5	protein_coding
II	11614679	T	[C]	{C, T}	0.0151515	1	TRUE	FALSE	TRUE	0.0300717	66	0	1	65	C	3_prime_UTR_variant	MODIFIER	din-1	WBGene00008549	transcript	F07A11.6b	protein_coding
II	11614819	T	[A]	{A, T}	0.03125	1	TRUE	FALSE	FALSE	0.0610236	64	0	2	62	A	3_prime_UTR_variant	MODIFIER	din-1	WBGene00008549	transcript	F07A11.6g.1	protein_coding
II	11614875	G	[T]	{G, T}	0.015625	1	TRUE	FALSE	FALSE	0.0310039	64	0	1	63	T	3_prime_UTR_variant	MODIFIER	din-1	WBGene00008549	transcript	F07A11.6g.1	protein_coding
II	11614896	C	[A]	{C, A}	0.046875	1	TRUE	FALSE	FALSE	0.0900591	64	0	3	61	A	3_prime_UTR_variant	MODIFIER	din-1	WBGene00008549	transcript	F07A11.6g.1	protein_coding
II	11614944	AAGT	[A]	{A, AAGT}	0.015625	1	FALSE	TRUE	FALSE	0.0310039	64	0	1	63	A	3_prime_UTR_variant	MODIFIER	din-1	WBGene00008549	transcript	F07A11.6b	protein_coding
II	11614957	A	[G]	{G, A}	0.015625	1	TRUE	FALSE	TRUE	0.0310039	64	0	1	63	G	3_prime_UTR_variant	MODIFIER	din-1	WBGene00008549	transcript	F07A11.6b	protein_coding
II	11615103	G	[T]	{G, T}	0.171875	1	TRUE	FALSE	FALSE	0.286909	64	0	11	53	T	3_prime_UTR_variant	MODIFIER	din-1	WBGene00008549	transcript	F07A11.6b	protein_coding
II	11615111	A	[G]	{G, A}	0.015625	1	TRUE	FALSE	TRUE	0.0310039	64	0	1	63	G	3_prime_UTR_variant	MODIFIER	din-1	WBGene00008549	transcript	F07A11.6b	protein_coding
II	11615130	G	[A]	{G, A}	0.015625	1	TRUE	FALSE	TRUE	0.0310039	64	0	1	63	A	3_prime_UTR_variant	MODIFIER	din-1	WBGene00008549	transcript	F07A11.6b	protein_coding
II	11615152	CT	[CTT, C]	{CTT, CT}	0.328125	1	FALSE	TRUE	FALSE	0.44439	64	0	21	43	C	3_prime_UTR_variant	MODIFIER	din-1	WBGene00008549	transcript	F07A11.6b	protein_coding
II	11615196	A	[T, G]	{G, A, T}	0.1875	1	TRUE	FALSE	FALSE	0.307087	64	0	12	52	G	3_prime_UTR_variant	MODIFIER	din-1	WBGene00008549	transcript	F07A11.6b	protein_coding
II	11615204	T	[C]	{C, T}	0.015625	1	TRUE	FALSE	TRUE	0.0310039	64	0	1	63	C	3_prime_UTR_variant	MODIFIER	din-1	WBGene00008549	transcript	F07A11.6b	protein_coding
II	11615223	G	[A]	{G, A}	0.28125	1	TRUE	FALSE	TRUE	0.40748	64	0	18	46	A	3_prime_UTR_variant	MODIFIER	din-1	WBGene00008549	transcript	F07A11.6b	protein_coding
II	11615473	G	[A]	{G, A}	0.015625	1	TRUE	FALSE	TRUE	0.0310039	64	0	1	63	A	intron_variant	MODIFIER	din-1	WBGene00008549	transcript	F07A11.6b	protein_coding
II	11615571	A	[G]	{G, A}	0.015625	1	TRUE	FALSE	TRUE	0.0310039	64	0	1	63	G	intron_variant	MODIFIER	din-1	WBGene00008549	transcript	F07A11.6b	protein_coding
II	11615634	T	[C]	{C, T}	0.015625	1	TRUE	FALSE	TRUE	0.0310039	64	0	1	63	C	intron_variant	MODIFIER	din-1	WBGene00008549	transcript	F07A11.6b	protein_coding
II	11615676	AT	[A]	{AT, A}	0.28125	1	FALSE	TRUE	FALSE	0.40748	64	0	18	46	A	intron_variant	MODIFIER	din-1	WBGene00008549	transcript	F07A11.6b	protein_coding
II	11615739	T	[C]	{C, T}	0.015625	1	TRUE	FALSE	TRUE	0.0310039	64	0	1	63	C	intron_variant	MODIFIER	din-1	WBGene00008549	transcript	F07A11.6b	protein_coding
II	11615921	G	[T]	{G, T}	0.015625	1	TRUE	FALSE	FALSE	0.0310039	64	0	1	63	T	intron_variant	MODIFIER	din-1	WBGene00008549	transcript	F07A11.6b	protein_coding
II	11615930	C	[T]	{C, T}	0.907692	1	TRUE	FALSE	TRUE	0.168873	65	0	59	6	T	intron_variant	MODIFIER	din-1	WBGene00008549	transcript	F07A11.6b	protein_coding
II	11616162	C	[T]	{C, T}	0.0153846	1	TRUE	FALSE	TRUE	0.0305307	65	0	1	64	T	intron_variant	MODIFIER	din-1	WBGene00008549	transcript	F07A11.6b	protein_coding
II	11616215	C	[T]	{C, T}	0.0153846	1	TRUE	FALSE	TRUE	0.0305307	65	0	1	64	T	intron_variant	MODIFIER	din-1	WBGene00008549	transcript	F07A11.6b	protein_coding
II	11616393	G	[GTC]	{G, GTC}	0.107692	1	FALSE	TRUE	FALSE	0.193679	65	0	7	58	GTC	intron_variant	MODIFIER	din-1	WBGene00008549	transcript	F07A11.6b	protein_coding
II	11616396	T	[TCG]	{TCG, T}	0.0153846	1	FALSE	TRUE	FALSE	0.0305307	65	0	1	64	TCG	intron_variant	MODIFIER	din-1	WBGene00008549	transcript	F07A11.6b	protein_coding
II	11616411	T	[C]	{C, T}	0.0461538	1	TRUE	FALSE	TRUE	0.0887299	65	0	3	62	C	intron_variant	MODIFIER	din-1	WBGene00008549	transcript	F07A11.6b	protein_coding
II	11616456	A	[G]	{G, A}	0.169231	1	TRUE	FALSE	TRUE	0.283363	65	0	11	54	G	intron_variant	MODIFIER	din-1	WBGene00008549	transcript	F07A11.6b	protein_coding
II	11616605	G	[A]	{G, A}	0.0769231	1	TRUE	FALSE	TRUE	0.143113	65	0	5	60	A	intron_variant	MODIFIER	din-1	WBGene00008549	transcript	F07A11.6b	protein_coding
II	11616689	C	[T]	{C, T}	0.0923077	1	TRUE	FALSE	TRUE	0.168873	65	0	6	59	T	intron_variant	MODIFIER	din-1	WBGene00008549	transcript	F07A11.6b	protein_coding
II	11616787	A	[G]	{G, A}	0.0153846	1	TRUE	FALSE	TRUE	0.0305307	65	0	1	64	G	intron_variant	MODIFIER	din-1	WBGene00008549	transcript	F07A11.6b	protein_coding
II	11616829	C	[T]	{C, T}	0.0153846	1	TRUE	FALSE	TRUE	0.0305307	65	0	1	64	T	intron_variant	MODIFIER	din-1	WBGene00008549	transcript	F07A11.6b	protein_coding
II	11616925	A	[C]	{C, A}	0.0923077	1	TRUE	FALSE	FALSE	0.168873	65	0	6	59	C	intron_variant	MODIFIER	din-1	WBGene00008549	transcript	F07A11.6b	protein_coding
II	11617248	C	[T]	{C, T}	0.0307692	1	TRUE	FALSE	TRUE	0.0601073	65	0	2	63	T	5_prime_UTR_variant	MODIFIER	din-1	WBGene00008549	transcript	F07A11.6g.2	protein_coding
II	11617250	C	[T]	{C, T}	0.0153846	1	TRUE	FALSE	TRUE	0.0305307	65	0	1	64	T	intron_variant	MODIFIER	din-1	WBGene00008549	transcript	F07A11.6b	protein_coding
II	11617272	AT	[A]	{AT, A}	0.0153846	1	FALSE	TRUE	FALSE	0.0305307	65	0	1	64	A	intron_variant	MODIFIER	din-1	WBGene00008549	transcript	F07A11.6b	protein_coding
II	11617286	C	[T]	{C, T}	0.0923077	1	TRUE	FALSE	TRUE	0.168873	65	0	6	59	T	intron_variant	MODIFIER	din-1	WBGene00008549	transcript	F07A11.6b	protein_coding
II	11617363	G	[A]	{G, A}	0.153846	1	TRUE	FALSE	TRUE	0.262373	65	0	10	55	A	intron_variant	MODIFIER	din-1	WBGene00008549	transcript	F07A11.6b	protein_coding
II	11617421	CGCGA	[C]	{C, CGCGA}	0.0153846	1	FALSE	TRUE	FALSE	0.0305307	65	0	1	64	C	intron_variant	MODIFIER	din-1	WBGene00008549	transcript	F07A11.6b	protein_coding
II	11617437	T	[G]	{G, T}	0.0153846	1	TRUE	FALSE	FALSE	0.0305307	65	0	1	64	G	intron_variant	MODIFIER	din-1	WBGene00008549	transcript	F07A11.6b	protein_coding
II	11617858	C	[T]	{C, T}	0.153846	1	TRUE	FALSE	TRUE	0.262373	65	0	10	55	T	intron_variant	MODIFIER	din-1	WBGene00008549	transcript	F07A11.6b	protein_coding
II	11617982	T	[C]	{C, T}	0.0153846	1	TRUE	FALSE	TRUE	0.0305307	65	0	1	64	C	intron_variant	MODIFIER	din-1	WBGene00008549	transcript	F07A11.6b	protein_coding
II	11619239	C	[T]	{C, T}	0.0769231	1	TRUE	FALSE	TRUE	0.143113	65	0	5	60	T	5_prime_UTR_variant	MODIFIER	din-1	WBGene00008549	transcript	F07A11.6d.1	protein_coding
II	11619253	C	[A]	{C, A}	0.0923077	1	TRUE	FALSE	FALSE	0.168873	65	0	6	59	A	5_prime_UTR_variant	MODIFIER	din-1	WBGene00008549	transcript	F07A11.6d.1	protein_coding
II	11619299	A	[C]	{C, A}	0.169231	1	TRUE	FALSE	FALSE	0.283363	65	0	11	54	C	5_prime_UTR_variant	MODIFIER	din-1	WBGene00008549	transcript	F07A11.6d.1	protein_coding
II	11619440	C	[A]	{C, A}	0.169231	1	TRUE	FALSE	FALSE	0.283363	65	0	11	54	A	5_prime_UTR_variant	MODIFIER	din-1	WBGene00008549	transcript	F07A11.6d.1	protein_coding
II	11619476	A	[G]	{G, A}	0.0153846	1	TRUE	FALSE	TRUE	0.0305307	65	0	1	64	G	5_prime_UTR_variant	MODIFIER	din-1	WBGene00008549	transcript	F07A11.6d.1	protein_coding
II	11619516	G	[T]	{G, T}	0.0153846	1	TRUE	FALSE	FALSE	0.0305307	65	0	1	64	T	5_prime_UTR_variant	MODIFIER	din-1	WBGene00008549	transcript	F07A11.6d.1	protein_coding
II	11619726	T	[A]	{A, T}	0.107692	1	TRUE	FALSE	FALSE	0.193679	65	0	7	58	A	5_prime_UTR_variant	MODIFIER	din-1	WBGene00008549	transcript	F07A11.6d.1	protein_coding
II	11619841	C	[T]	{C, T}	0.184615	1	TRUE	FALSE	TRUE	0.303399	65	0	12	53	T	5_prime_UTR_variant	MODIFIER	din-1	WBGene00008549	transcript	F07A11.6d.1	protein_coding
II	11619940	GACGACACT	[G]	{GACGACACT, G}	0.0153846	1	FALSE	TRUE	FALSE	0.0305307	65	0	1	64	G	5_prime_UTR_variant	MODIFIER	din-1	WBGene00008549	transcript	F07A11.6d.1	protein_coding
II	11620113	C	[T]	{C, T}	0.0153846	1	TRUE	FALSE	TRUE	0.0305307	65	0	1	64	T	intron_variant	MODIFIER	din-1	WBGene00008549	transcript	F07A11.6b	protein_coding
II	11620177	C	[G]	{C, G}	0.0923077	1	TRUE	FALSE	FALSE	0.168873	65	0	6	59	G	intron_variant	MODIFIER	din-1	WBGene00008549	transcript	F07A11.6b	protein_coding
II	11620192	A	[T]	{A, T}	0.0153846	1	TRUE	FALSE	FALSE	0.0305307	65	0	1	64	T	intron_variant	MODIFIER	din-1	WBGene00008549	transcript	F07A11.6b	protein_coding
II	11620323	A	[G]	{G, A}	0.0153846	1	TRUE	FALSE	TRUE	0.0305307	65	0	1	64	G	intron_variant	MODIFIER	din-1	WBGene00008549	transcript	F07A11.6b	protein_coding
II	11620365	G	[A]	{G, A}	0.0153846	1	TRUE	FALSE	TRUE	0.0305307	65	0	1	64	A	intron_variant	MODIFIER	din-1	WBGene00008549	transcript	F07A11.6b	protein_coding
II	11620420	C	[A]	{C, A}	0.0153846	1	TRUE	FALSE	FALSE	0.0305307	65	0	1	64	A	intron_variant	MODIFIER	din-1	WBGene00008549	transcript	F07A11.6b	protein_coding
II	11620481	G	[A]	{G, A}	0.0153846	1	TRUE	FALSE	TRUE	0.0305307	65	0	1	64	A	intron_variant	MODIFIER	din-1	WBGene00008549	transcript	F07A11.6b	protein_coding
II	11620570	ATG	[A]	{ATG, A}	0.0153846	1	FALSE	TRUE	FALSE	0.0305307	65	0	1	64	A	intron_variant	MODIFIER	din-1	WBGene00008549	transcript	F07A11.6b	protein_coding
II	11620623	A	[G]	{G, A}	0.0153846	1	TRUE	FALSE	TRUE	0.0305307	65	0	1	64	G	intron_variant	MODIFIER	din-1	WBGene00008549	transcript	F07A11.6b	protein_coding
II	11620695	T	[G]	{G, T}	0.0769231	1	TRUE	FALSE	FALSE	0.143113	65	0	5	60	G	intron_variant	MODIFIER	din-1	WBGene00008549	transcript	F07A11.6b	protein_coding
II	11620803	C	[CCT]	{C, CCT}	0.107692	1	FALSE	TRUE	FALSE	0.193679	65	0	7	58	CCT	intron_variant	MODIFIER	din-1	WBGene00008549	transcript	F07A11.6b	protein_coding
II	11620805	T	[TCG, TCA]	{TCG, T}	0.0153846	1	FALSE	TRUE	FALSE	0.0305307	65	0	1	64	TCA	intron_variant	MODIFIER	din-1	WBGene00008549	transcript	F07A11.6b	protein_coding
II	11620857	A	[AACATC, AACCTC, ATCATC, AACTTC, AACGTC, AAAATC, ACCATC, AATATC, AACAGC]	{AACATC, A}	0.0538462	1	FALSE	TRUE	FALSE	0.102683	65	3	2	60	AAAATC	intron_variant	MODIFIER	din-1	WBGene00008549	transcript	F07A11.6b	protein_coding
II	11620860	A	[ATCACT]	{ATCACT, A}	0.907692	1	FALSE	TRUE	FALSE	0.168873	65	0	59	6	ATCACT	intron_variant	MODIFIER	din-1	WBGene00008549	transcript	F07A11.6b	protein_coding
II	11620931	T	[G]	{G, T}	0.0307692	1	TRUE	FALSE	FALSE	0.0601073	65	0	2	63	G	intron_variant	MODIFIER	din-1	WBGene00008549	transcript	F07A11.6b	protein_coding
II	11621008	A	[G]	{G, A}	0.0153846	1	TRUE	FALSE	TRUE	0.0305307	65	0	1	64	G	intron_variant	MODIFIER	din-1	WBGene00008549	transcript	F07A11.6b	protein_coding
II	11621044	CCT	[C, CCTCT]	{C, CCT}	0.0923077	1	FALSE	TRUE	FALSE	0.168873	65	0	6	59	C	intron_variant	MODIFIER	din-1	WBGene00008549	transcript	F07A11.6b	protein_coding
II	11621086	A	[G]	{G, A}	0.0153846	1	TRUE	FALSE	TRUE	0.0305307	65	0	1	64	G	intron_variant	MODIFIER	din-1	WBGene00008549	transcript	F07A11.6b	protein_coding
II	11621101	TA	[T]	{TA, T}	0.0461538	1	FALSE	TRUE	FALSE	0.0887299	65	0	3	62	T	intron_variant	MODIFIER	din-1	WBGene00008549	transcript	F07A11.6b	protein_coding
II	11621392	G	[A]	{G, A}	0.0769231	1	TRUE	FALSE	TRUE	0.143113	65	0	5	60	A	intron_variant	MODIFIER	din-1	WBGene00008549	transcript	F07A11.6b	protein_coding
II	11621431	T	[TTG]	{TTG, T}	0.0153846	1	FALSE	TRUE	FALSE	0.0305307	65	0	1	64	TTG	intron_variant	MODIFIER	din-1	WBGene00008549	transcript	F07A11.6b	protein_coding
II	11621432	T	[TGC]	{TGC, T}	0.0153846	1	FALSE	TRUE	FALSE	0.0305307	65	0	1	64	TGC	intron_variant	MODIFIER	din-1	WBGene00008549	transcript	F07A11.6b	protein_coding
II	11621433	G	[GCA]	{G, GCA}	0.0769231	1	FALSE	TRUE	FALSE	0.143113	65	0	5	60	GCA	intron_variant	MODIFIER	din-1	WBGene00008549	transcript	F07A11.6b	protein_coding
II	11621434	C	[CAG, CAA]	{C, CAA, CAG}	0.0307692	1	FALSE	TRUE	FALSE	0.0601073	65	0	2	63	CAA	intron_variant	MODIFIER	din-1	WBGene00008549	transcript	F07A11.6b	protein_coding
II	11621546	T	[C]	{C, T}	0.0769231	1	TRUE	FALSE	TRUE	0.143113	65	0	5	60	C	intron_variant	MODIFIER	din-1	WBGene00008549	transcript	F07A11.6b	protein_coding
II	11621631	T	[A]	{A, T}	0.0769231	1	TRUE	FALSE	FALSE	0.143113	65	0	5	60	A	intron_variant	MODIFIER	din-1	WBGene00008549	transcript	F07A11.6b	protein_coding
II	11621686	G	[T]	{G, T}	0.861538	1	TRUE	FALSE	FALSE	0.240429	65	0	56	9	T	intron_variant	MODIFIER	din-1	WBGene00008549	transcript	F07A11.6b	protein_coding
II	11621704	G	[A]	{G, A}	0.692308	1	TRUE	FALSE	TRUE	0.429338	65	0	45	20	A	intron_variant	MODIFIER	din-1	WBGene00008549	transcript	F07A11.6b	protein_coding
II	11621733	G	[C]	{C, G}	0.0153846	1	TRUE	FALSE	FALSE	0.0305307	65	0	1	64	C	intron_variant	MODIFIER	din-1	WBGene00008549	transcript	F07A11.6b	protein_coding
II	11621754	T	[C]	{C, T}	0.0307692	1	TRUE	FALSE	TRUE	0.0601073	65	0	2	63	C	intron_variant	MODIFIER	din-1	WBGene00008549	transcript	F07A11.6b	protein_coding
II	11621857	GT	[G]	{G, GT}	0.3	1	FALSE	TRUE	FALSE	0.423256	65	1	19	45	G	intron_variant	MODIFIER	din-1	WBGene00008549	transcript	F07A11.6b	protein_coding
II	11621908	A	[C]	{C, A}	0.0923077	1	TRUE	FALSE	FALSE	0.168873	65	0	6	59	C	intron_variant	MODIFIER	din-1	WBGene00008549	transcript	F07A11.6b	protein_coding
II	11621991	C	[T]	{C, T}	0.0461538	1	TRUE	FALSE	TRUE	0.0887299	65	0	3	62	T	intron_variant	MODIFIER	din-1	WBGene00008549	transcript	F07A11.6b	protein_coding
II	11622007	AT	[A]	{AT, A}	0.0307692	1	FALSE	TRUE	FALSE	0.0601073	65	0	2	63	A	intron_variant	MODIFIER	din-1	WBGene00008549	transcript	F07A11.6b	protein_coding
II	11622011	A	[T]	{A, T}	0.2	1	TRUE	FALSE	FALSE	0.322481	65	0	13	52	T	intron_variant	MODIFIER	din-1	WBGene00008549	transcript	F07A11.6b	protein_coding
II	11622012	A	[T]	{A, T}	0.0307692	1	TRUE	FALSE	FALSE	0.0601073	65	0	2	63	T	intron_variant	MODIFIER	din-1	WBGene00008549	transcript	F07A11.6b	protein_coding
II	11622077	C	[T]	{C, T}	0.0923077	1	TRUE	FALSE	TRUE	0.168873	65	0	6	59	T	intron_variant	MODIFIER	din-1	WBGene00008549	transcript	F07A11.6b	protein_coding
II	11622129	A	[T]	{A, T}	0.0153846	1	TRUE	FALSE	FALSE	0.0305307	65	0	1	64	T	intron_variant	MODIFIER	din-1	WBGene00008549	transcript	F07A11.6b	protein_coding
II	11622198	T	[A]	{A, T}	0.0923077	1	TRUE	FALSE	FALSE	0.168873	65	0	6	59	A	intron_variant	MODIFIER	din-1	WBGene00008549	transcript	F07A11.6b	protein_coding
II	11622398	C	[A]	{C, A}	0.0153846	1	TRUE	FALSE	FALSE	0.0305307	65	0	1	64	A	intron_variant	MODIFIER	din-1	WBGene00008549	transcript	F07A11.6b	protein_coding
II	11622436	A	[G]	{G, A}	0.907692	1	TRUE	FALSE	TRUE	0.168873	65	0	59	6	G	intron_variant	MODIFIER	din-1	WBGene00008549	transcript	F07A11.6b	protein_coding
II	11622437	A	[T]	{A, T}	0.907692	1	TRUE	FALSE	FALSE	0.168873	65	0	59	6	T	intron_variant	MODIFIER	din-1	WBGene00008549	transcript	F07A11.6b	protein_coding
II	11622518	G	[A]	{G, A}	0.0153846	1	TRUE	FALSE	TRUE	0.0305307	65	0	1	64	A	intron_variant	MODIFIER	din-1	WBGene00008549	transcript	F07A11.6b	protein_coding
II	11622528	ATGT	[A]	{ATGT, A}	0.0307692	1	FALSE	TRUE	FALSE	0.0601073	65	0	2	63	A	intron_variant	MODIFIER	din-1	WBGene00008549	transcript	F07A11.6b	protein_coding
II	11622530	GTTT	[G]	{G, GTTT}	0.861538	1	FALSE	TRUE	FALSE	0.240429	65	0	56	9	G	intron_variant	MODIFIER	din-1	WBGene00008549	transcript	F07A11.6b	protein_coding
II	11623840	CT	[C]	{CT, C}	0.0923077	1	FALSE	TRUE	FALSE	0.168873	65	0	6	59	C	intron_variant	MODIFIER	din-1	WBGene00008549	transcript	F07A11.6b	protein_coding
II	11623841	TA	[T]	{TA, T}	0.0163934	1	FALSE	TRUE	FALSE	0.0325159	61	0	1	60	T	intron_variant	MODIFIER	din-1	WBGene00008549	transcript	F07A11.6b	protein_coding
II	11623900	A	[T]	{A, T}	0.0769231	1	TRUE	FALSE	FALSE	0.143113	65	0	5	60	T	intron_variant	MODIFIER	din-1	WBGene00008549	transcript	F07A11.6b	protein_coding
II	11623906	A	[G]	{G, A}	0.184615	1	TRUE	FALSE	TRUE	0.303399	65	0	12	53	G	intron_variant	MODIFIER	din-1	WBGene00008549	transcript	F07A11.6b	protein_coding
II	11624535	T	[A]	{A, T}	0.169231	1	TRUE	FALSE	FALSE	0.283363	65	0	11	54	A	intron_variant	MODIFIER	din-1	WBGene00008549	transcript	F07A11.6b	protein_coding
II	11626882	A	[T]	{A, T}	0.0923077	1	TRUE	FALSE	FALSE	0.168873	65	0	6	59	T	intron_variant	MODIFIER	din-1	WBGene00008549	transcript	F07A11.6b	protein_coding
II	11626906	A	[G]	{G, A}	0.171875	1	TRUE	FALSE	TRUE	0.286909	64	0	11	53	G	intron_variant	MODIFIER	din-1	WBGene00008549	transcript	F07A11.6b	protein_coding
II	11626939	A	[G]	{G, A}	0.015625	1	TRUE	FALSE	TRUE	0.0310039	64	0	1	63	G	intron_variant	MODIFIER	din-1	WBGene00008549	transcript	F07A11.6b	protein_coding
II	11627355	G	[T]	{G, T}	0.09375	1	TRUE	FALSE	FALSE	0.17126	64	0	6	58	T	intron_variant	MODIFIER	din-1	WBGene00008549	transcript	F07A11.6b	protein_coding
II	11627356	G	[T]	{G, T}	0.09375	1	TRUE	FALSE	FALSE	0.17126	64	0	6	58	T	intron_variant	MODIFIER	din-1	WBGene00008549	transcript	F07A11.6b	protein_coding
II	11627383	G	[C]	{C, G}	0.0923077	1	TRUE	FALSE	FALSE	0.168873	65	0	6	59	C	intron_variant	MODIFIER	din-1	WBGene00008549	transcript	F07A11.6b	protein_coding
II	11627399	CA	[CAA, C]	{C, CAA, CA}	0.0615385	1	FALSE	TRUE	FALSE	0.116398	65	0	4	61	C	intron_variant	MODIFIER	din-1	WBGene00008549	transcript	F07A11.6b	protein_coding
II	11627465	GGGATCCT	[G]	{G, GGGATCCT}	0.0153846	1	FALSE	TRUE	FALSE	0.0305307	65	0	1	64	G	intron_variant	MODIFIER	din-1	WBGene00008549	transcript	F07A11.6b	protein_coding
II	11627466	GGATCCTT	[G]	{GGATCCTT, G}	0.0153846	1	FALSE	TRUE	FALSE	0.0305307	65	0	1	64	G	intron_variant	MODIFIER	din-1	WBGene00008549	transcript	F07A11.6b	protein_coding
II	11627648	A	[G]	{G, A}	0.0461538	1	TRUE	FALSE	TRUE	0.0887299	65	0	3	62	G	intron_variant	MODIFIER	din-1	WBGene00008549	transcript	F07A11.6b	protein_coding
II	11628456	A	[C]	{C, A}	0.0461538	1	TRUE	FALSE	FALSE	0.0887299	65	0	3	62	C	intron_variant	MODIFIER	din-1	WBGene00008549	transcript	F07A11.6b	protein_coding
II	11628784	A	[G]	{G, A}	0.0153846	1	TRUE	FALSE	TRUE	0.0305307	65	0	1	64	G	intron_variant	MODIFIER	din-1	WBGene00008549	transcript	F07A11.6b	protein_coding
II	11628877	A	[G]	{G, A}	0.0153846	1	TRUE	FALSE	TRUE	0.0305307	65	0	1	64	G	intron_variant	MODIFIER	din-1	WBGene00008549	transcript	F07A11.6b	protein_coding
II	11628958	C	[A]	{C, A}	0.0923077	1	TRUE	FALSE	FALSE	0.168873	65	0	6	59	A	intron_variant	MODIFIER	din-1	WBGene00008549	transcript	F07A11.6b	protein_coding
II	11628985	ATT	[A]	{ATT, A}	0.0153846	1	FALSE	TRUE	FALSE	0.0305307	65	0	1	64	A	intron_variant	MODIFIER	din-1	WBGene00008549	transcript	F07A11.6b	protein_coding
II	11629023	A	[G]	{G, A}	0.0923077	1	TRUE	FALSE	TRUE	0.168873	65	0	6	59	G	intron_variant	MODIFIER	din-1	WBGene00008549	transcript	F07A11.6b	protein_coding
II	11629031	T	[A]	{A, T}	0.0153846	1	TRUE	FALSE	FALSE	0.0305307	65	0	1	64	A	intron_variant	MODIFIER	din-1	WBGene00008549	transcript	F07A11.6b	protein_coding
II	11629051	G	[A]	{G, A}	0.184615	1	TRUE	FALSE	TRUE	0.303399	65	0	12	53	A	intron_variant	MODIFIER	din-1	WBGene00008549	transcript	F07A11.6b	protein_coding
II	11629075	G	[A]	{G, A}	0.0153846	1	TRUE	FALSE	TRUE	0.0305307	65	0	1	64	A	intron_variant	MODIFIER	din-1	WBGene00008549	transcript	F07A11.6b	protein_coding
II	11629087	A	[T]	{A, T}	0.0923077	1	TRUE	FALSE	FALSE	0.168873	65	0	6	59	T	intron_variant	MODIFIER	din-1	WBGene00008549	transcript	F07A11.6b	protein_coding
II	11629137	C	[T]	{C, T}	0.0153846	1	TRUE	FALSE	TRUE	0.0305307	65	0	1	64	T	intron_variant	MODIFIER	din-1	WBGene00008549	transcript	F07A11.6b	protein_coding
II	11629155	A	[T]	{A, T}	0.0153846	1	TRUE	FALSE	FALSE	0.0305307	65	0	1	64	T	intron_variant	MODIFIER	din-1	WBGene00008549	transcript	F07A11.6b	protein_coding
II	11629158	T	[A]	{A, T}	0.0153846	1	TRUE	FALSE	FALSE	0.0305307	65	0	1	64	A	intron_variant	MODIFIER	din-1	WBGene00008549	transcript	F07A11.6b	protein_coding
II	11629531	C	[T]	{C, T}	0.0153846	1	TRUE	FALSE	TRUE	0.0305307	65	0	1	64	T	intron_variant	MODIFIER	din-1	WBGene00008549	transcript	F07A11.6b	protein_coding
II	11629563	A	[G]	{G, A}	0.692308	1	TRUE	FALSE	TRUE	0.429338	65	0	45	20	G	intron_variant	MODIFIER	din-1	WBGene00008549	transcript	F07A11.6b	protein_coding
II	11629607	G	[A]	{G, A}	0.0769231	1	TRUE	FALSE	TRUE	0.143113	65	0	5	60	A	intron_variant	MODIFIER	din-1	WBGene00008549	transcript	F07A11.6b	protein_coding
II	11629701	T	[C]	{C, T}	0.0769231	1	TRUE	FALSE	TRUE	0.143113	65	0	5	60	C	intron_variant	MODIFIER	din-1	WBGene00008549	transcript	F07A11.6b	protein_coding
II	11629776	C	[T]	{C, T}	0.0153846	1	TRUE	FALSE	TRUE	0.0305307	65	0	1	64	T	intron_variant	MODIFIER	din-1	WBGene00008549	transcript	F07A11.6b	protein_coding
II	11629789	A	[T]	{A, T}	0.153846	1	TRUE	FALSE	FALSE	0.262373	65	0	10	55	T	intron_variant	MODIFIER	din-1	WBGene00008549	transcript	F07A11.6b	protein_coding
II	11629876	A	[C]	{C, A}	0.861538	1	TRUE	FALSE	FALSE	0.240429	65	0	56	9	C	intron_variant	MODIFIER	din-1	WBGene00008549	transcript	F07A11.6b	protein_coding
II	11629894	T	[A]	{A, T}	0.0923077	1	TRUE	FALSE	FALSE	0.168873	65	0	6	59	A	intron_variant	MODIFIER	din-1	WBGene00008549	transcript	F07A11.6b	protein_coding
II	11629925	AAATAAGTAAAAGACCT	[A]	{AAATAAGTAAAAGACCT, A}	0.0153846	1	FALSE	TRUE	FALSE	0.0305307	65	0	1	64	A	intron_variant	MODIFIER	din-1	WBGene00008549	transcript	F07A11.6b	protein_coding
II	11629951	G	[A]	{G, A}	0.0153846	1	TRUE	FALSE	TRUE	0.0305307	65	0	1	64	A	intron_variant	MODIFIER	din-1	WBGene00008549	transcript	F07A11.6b	protein_coding
II	11630097	TTC	[T]	{TTC, T}	0.0153846	1	FALSE	TRUE	FALSE	0.0305307	65	0	1	64	T	intron_variant	MODIFIER	din-1	WBGene00008549	transcript	F07A11.6b	protein_coding
II	11630158	A	[G]	{G, A}	0.0923077	1	TRUE	FALSE	TRUE	0.168873	65	0	6	59	G	intron_variant	MODIFIER	din-1	WBGene00008549	transcript	F07A11.6b	protein_coding
II	11630167	C	[T]	{C, T}	0.0923077	1	TRUE	FALSE	TRUE	0.168873	65	0	6	59	T	intron_variant	MODIFIER	din-1	WBGene00008549	transcript	F07A11.6b	protein_coding
II	11630858	G	[A]	{G, A}	0.861538	1	TRUE	FALSE	TRUE	0.240429	65	0	56	9	A	intron_variant	MODIFIER	din-1	WBGene00008549	transcript	F07A11.6b	protein_coding
II	11630860	C	[G]	{C, G}	0.907692	1	TRUE	FALSE	FALSE	0.168873	65	0	59	6	G	intron_variant	MODIFIER	din-1	WBGene00008549	transcript	F07A11.6b	protein_coding
II	11630869	G	[T]	{G, T}	0.0923077	1	TRUE	FALSE	FALSE	0.168873	65	0	6	59	T	intron_variant	MODIFIER	din-1	WBGene00008549	transcript	F07A11.6b	protein_coding
II	11630995	A	[G]	{G, A}	0.0153846	1	TRUE	FALSE	TRUE	0.0305307	65	0	1	64	G	intron_variant	MODIFIER	din-1	WBGene00008549	transcript	F07A11.6b	protein_coding
II	11631027	ATGGGGGGGGGGGG	[AGGGGGGG, AGG, AG, AGGGG, AGGG, AGGGGG, A]	{AGGG, ATGGGGGGGGGGGG, AG, AGG, AGGGG}	0.109375	1	FALSE	TRUE	FALSE	0.196358	64	4	5	55	AGGGGGGG	intron_variant	MODIFIER	din-1	WBGene00008549	transcript	F07A11.6b	protein_coding
II	11631039	GGGGGGGGGGGGA	[G]	{G, GGGGGGGGGGGGA}	0.27193	1	FALSE	TRUE	FALSE	0.399472	57	1	15	41	G	intron_variant	MODIFIER	din-1	WBGene00008549	transcript	F07A11.6b	protein_coding
II	11631040	GGGGGGGGGGGA	[G]	{GGGGGGGGGGGA, G}	0.535088	1	FALSE	TRUE	FALSE	0.501941	57	3	29	25	G	intron_variant	MODIFIER	din-1	WBGene00008549	transcript	F07A11.6b	protein_coding
II	11631041	GGGGGGGGGGAGC	[GGC, G]	{GGC, GGGGGGGGGGAGC}	0.135593	1	FALSE	TRUE	FALSE	0.236419	59	2	7	50	G	intron_variant	MODIFIER	din-1	WBGene00008549	transcript	F07A11.6b	protein_coding
II	11631042	GGGGGGGGGAGC	[G, GGC]	{G, GGGGGGGGGAGC}	0.0390625	1	FALSE	TRUE	FALSE	0.0756644	64	1	2	61	G	intron_variant	MODIFIER	din-1	WBGene00008549	transcript	F07A11.6b	protein_coding
II	11631088	C	[G]	{C, G}	0.0153846	1	TRUE	FALSE	FALSE	0.0305307	65	0	1	64	G	intron_variant	MODIFIER	din-1	WBGene00008549	transcript	F07A11.6b	protein_coding
II	11631138	CA	[C]	{C, CA}	0.0153846	1	FALSE	TRUE	FALSE	0.0305307	65	0	1	64	C	intron_variant	MODIFIER	din-1	WBGene00008549	transcript	F07A11.6b	protein_coding
II	11631307	A	[G]	{G, A}	0.0923077	1	TRUE	FALSE	TRUE	0.168873	65	0	6	59	G	intron_variant	MODIFIER	din-1	WBGene00008549	transcript	F07A11.6b	protein_coding
II	11631308	A	[C]	{C, A}	0.0923077	1	TRUE	FALSE	FALSE	0.168873	65	0	6	59	C	intron_variant	MODIFIER	din-1	WBGene00008549	transcript	F07A11.6b	protein_coding
II	11631339	TC	[T]	{TC, T}	0.0153846	1	FALSE	TRUE	FALSE	0.0305307	65	0	1	64	T	intron_variant	MODIFIER	din-1	WBGene00008549	transcript	F07A11.6b	protein_coding
II	11631380	G	[C]	{C, G}	0.0153846	1	TRUE	FALSE	FALSE	0.0305307	65	0	1	64	C	intron_variant	MODIFIER	din-1	WBGene00008549	transcript	F07A11.6b	protein_coding
II	11631454	A	[G]	{G, A}	0.0153846	1	TRUE	FALSE	TRUE	0.0305307	65	0	1	64	G	intron_variant	MODIFIER	din-1	WBGene00008549	transcript	F07A11.6b	protein_coding
II	11631508	A	[C]	{C, A}	0.0153846	1	TRUE	FALSE	FALSE	0.0305307	65	0	1	64	C	intron_variant	MODIFIER	din-1	WBGene00008549	transcript	F07A11.6b	protein_coding
II	11631578	A	[C]	{C, A}	0.0153846	1	TRUE	FALSE	FALSE	0.0305307	65	0	1	64	C	intron_variant	MODIFIER	din-1	WBGene00008549	transcript	F07A11.6b	protein_coding
II	11631586	G	[A]	{G, A}	0.523077	1	TRUE	FALSE	TRUE	0.502803	65	0	34	31	A	intron_variant	MODIFIER	din-1	WBGene00008549	transcript	F07A11.6b	protein_coding
II	11631640	T	[C]	{C, T}	0.0769231	1	TRUE	FALSE	TRUE	0.143113	65	0	5	60	C	intron_variant	MODIFIER	din-1	WBGene00008549	transcript	F07A11.6b	protein_coding
II	11631646	C	[T]	{C, T}	0.0923077	1	TRUE	FALSE	TRUE	0.168873	65	0	6	59	T	intron_variant	MODIFIER	din-1	WBGene00008549	transcript	F07A11.6b	protein_coding
II	11631944	A	[T]	{A, T}	0.0923077	1	TRUE	FALSE	FALSE	0.168873	65	0	6	59	T	intron_variant	MODIFIER	din-1	WBGene00008549	transcript	F07A11.6b	protein_coding
II	11631960	TTTTA	[T]	{TTTTA, T}	0.0153846	1	FALSE	TRUE	FALSE	0.0305307	65	0	1	64	T	intron_variant	MODIFIER	din-1	WBGene00008549	transcript	F07A11.6b	protein_coding
II	11631968	T	[A]	{A, T}	0.153846	1	TRUE	FALSE	FALSE	0.262373	65	0	10	55	A	intron_variant	MODIFIER	din-1	WBGene00008549	transcript	F07A11.6b	protein_coding
II	11632428	AT	[A]	{AT, A}	0.0153846	1	FALSE	TRUE	FALSE	0.0305307	65	0	1	64	A	intron_variant	MODIFIER	din-1	WBGene00008549	transcript	F07A11.6b	protein_coding
II	11632437	A	[G]	{G, A}	0.0153846	1	TRUE	FALSE	TRUE	0.0305307	65	0	1	64	G	intron_variant	MODIFIER	din-1	WBGene00008549	transcript	F07A11.6b	protein_coding
II	11632540	C	[CA]	{C, CA}	0.0923077	1	FALSE	TRUE	FALSE	0.168873	65	0	6	59	CA	intron_variant	MODIFIER	din-1	WBGene00008549	transcript	F07A11.6b	protein_coding
II	11632674	T	[A]	{A, T}	0.0153846	1	TRUE	FALSE	FALSE	0.0305307	65	0	1	64	A	intron_variant	MODIFIER	din-1	WBGene00008549	transcript	F07A11.6b	protein_coding
II	11632680	C	[T]	{C, T}	0.153846	1	TRUE	FALSE	TRUE	0.262373	65	0	10	55	T	intron_variant	MODIFIER	din-1	WBGene00008549	transcript	F07A11.6b	protein_coding
II	11632712	T	[A]	{A, T}	0.861538	1	TRUE	FALSE	FALSE	0.240429	65	0	56	9	A	intron_variant	MODIFIER	din-1	WBGene00008549	transcript	F07A11.6b	protein_coding
II	11632782	GA	[G]	{G, GA}	0.0153846	1	FALSE	TRUE	FALSE	0.0305307	65	0	1	64	G	intron_variant	MODIFIER	din-1	WBGene00008549	transcript	F07A11.6b	protein_coding
II	11632845	C	[T]	{C, T}	0.153846	1	TRUE	FALSE	TRUE	0.262373	65	0	10	55	T	intron_variant	MODIFIER	din-1	WBGene00008549	transcript	F07A11.6b	protein_coding
II	11632942	A	[G]	{G, A}	0.0615385	1	TRUE	FALSE	TRUE	0.116398	65	0	4	61	G	intron_variant	MODIFIER	din-1	WBGene00008549	transcript	F07A11.6b	protein_coding
II	11633464	A	[T]	{A, T}	0.861538	1	TRUE	FALSE	FALSE	0.240429	65	0	56	9	T	intron_variant	MODIFIER	din-1	WBGene00008549	transcript	F07A11.6b	protein_coding
II	11635278	C	[CCA]	{C, CCA}	0.0153846	1	FALSE	TRUE	FALSE	0.0305307	65	0	1	64	CCA	non_coding_transcript_exon_variant	MODIFIER	ZK20.9	WBGene00220236	transcript	ZK20.9	snoRNA
II	11640546	G	[A]	{G, A}	0.0153846	1	TRUE	FALSE	TRUE	0.0305307	65	0	1	64	A	intron_variant	MODIFIER	kin-6	WBGene00002194	transcript	ZK20.2	protein_coding
II	11641263	A	[G]	{G, A}	0.0153846	1	TRUE	FALSE	TRUE	0.0305307	65	0	1	64	G	intron_variant	MODIFIER	kin-6	WBGene00002194	transcript	ZK20.2	protein_coding
II	11641982	T	[A]	{A, T}	0.015873	1	TRUE	FALSE	FALSE	0.0314921	63	0	1	62	A	non_coding_transcript_exon_variant	MODIFIER	ZK20.10	WBGene00220237	transcript	ZK20.10	lincRNA
II	11641999	A	[T]	{A, T}	0.142857	1	TRUE	FALSE	FALSE	0.246857	63	0	9	54	T	non_coding_transcript_exon_variant	MODIFIER	ZK20.10	WBGene00220237	transcript	ZK20.10	lincRNA
II	11642000	C	[T]	{C, T}	0.0952381	1	TRUE	FALSE	TRUE	0.173714	63	0	6	57	T	non_coding_transcript_exon_variant	MODIFIER	ZK20.10	WBGene00220237	transcript	ZK20.10	lincRNA
II	11646803	T	[C]	{C, T}	0.0923077	1	TRUE	FALSE	TRUE	0.168873	65	0	6	59	C	5_prime_UTR_variant	MODIFIER	ghi-1	WBGene00013923	transcript	ZK20.1	protein_coding
II	11647102	C	[A]	{C, A}	0.0461538	1	TRUE	FALSE	FALSE	0.0887299	65	0	3	62	A	intron_variant	MODIFIER	ghi-1	WBGene00013923	transcript	ZK20.1	protein_coding
II	11647143	G	[T]	{G, T}	0.0307692	1	TRUE	FALSE	FALSE	0.0601073	65	0	2	63	T	intron_variant	MODIFIER	ghi-1	WBGene00013923	transcript	ZK20.1	protein_coding
II	11647170	C	[G]	{C, G}	0.0153846	1	TRUE	FALSE	FALSE	0.0305307	65	0	1	64	G	intron_variant	MODIFIER	ghi-1	WBGene00013923	transcript	ZK20.1	protein_coding
II	11647202	A	[G]	{G, A}	0.153846	1	TRUE	FALSE	TRUE	0.262373	65	0	10	55	G	intron_variant	MODIFIER	ghi-1	WBGene00013923	transcript	ZK20.1	protein_coding
II	11647214	G	[GT, GTT]	{GTT, GT, G}	0.861538	1	FALSE	TRUE	FALSE	0.240429	65	0	56	9	GT	intron_variant	MODIFIER	ghi-1	WBGene00013923	transcript	ZK20.1	protein_coding
II	11647266	G	[T]	{G, T}	0.0153846	1	TRUE	FALSE	FALSE	0.0305307	65	0	1	64	T	intron_variant	MODIFIER	ghi-1	WBGene00013923	transcript	ZK20.1	protein_coding
II	11647397	A	[G]	{G, A}	0.0153846	1	TRUE	FALSE	TRUE	0.0305307	65	0	1	64	G	intron_variant	MODIFIER	ghi-1	WBGene00013923	transcript	ZK20.1	protein_coding
II	11647557	T	[A, C]	{C, T}	0.0153846	1	TRUE	FALSE	FALSE	0.0305307	65	0	1	64	A	intron_variant	MODIFIER	ghi-1	WBGene00013923	transcript	ZK20.1	protein_coding
II	11647652	T	[G]	{G, T}	0.0153846	1	TRUE	FALSE	FALSE	0.0305307	65	0	1	64	G	intron_variant	MODIFIER	ghi-1	WBGene00013923	transcript	ZK20.1	protein_coding
II	11647943	T	[C]	{C, T}	0.0923077	1	TRUE	FALSE	TRUE	0.168873	65	0	6	59	C	intron_variant	MODIFIER	ghi-1	WBGene00013923	transcript	ZK20.1	protein_coding
II	11648810	C	[CATTTTTTGT, CGTTTTTTTT, CATTTTTTTT, CCTTTTTTTT, CTTTTTTTTT]	{C, CCTTTTTTTT}	0.0153846	1	FALSE	TRUE	FALSE	0.0305307	65	0	1	64	CATTTTTTGT	intron_variant	MODIFIER	ghi-1	WBGene00013923	transcript	ZK20.1	protein_coding
II	11648811	A	[ATTTTTTTTT]	{ATTTTTTTTT, A}	0.169231	1	FALSE	TRUE	FALSE	0.283363	65	0	11	54	ATTTTTTTTT	intron_variant	MODIFIER	ghi-1	WBGene00013923	transcript	ZK20.1	protein_coding
II	11648817	CA	[C]	{C, CA}	0.0307692	1	FALSE	TRUE	FALSE	0.0601073	65	0	2	63	C	intron_variant	MODIFIER	ghi-1	WBGene00013923	transcript	ZK20.1	protein_coding
II	11649016	C	[T]	{C, T}	0.0153846	1	TRUE	FALSE	TRUE	0.0305307	65	0	1	64	T	3_prime_UTR_variant	MODIFIER	ghi-1	WBGene00013923	transcript	ZK20.1	protein_coding
II	11649084	G	[GA]	{G, GA}	0.184615	1	FALSE	TRUE	FALSE	0.303399	65	0	12	53	GA	3_prime_UTR_variant	MODIFIER	ghi-1	WBGene00013923	transcript	ZK20.1	protein_coding
II	11649159	C	[A]	{C, A}	0.153846	1	TRUE	FALSE	FALSE	0.262373	65	0	10	55	A	3_prime_UTR_variant	MODIFIER	ZK20.4	WBGene00013925	transcript	ZK20.4a.1	protein_coding
II	11649165	T	[A]	{A, T}	0.0307692	1	TRUE	FALSE	FALSE	0.0601073	65	0	2	63	A	3_prime_UTR_variant	MODIFIER	ZK20.4	WBGene00013925	transcript	ZK20.4a.1	protein_coding
II	11649445	TG	[T]	{TG, T}	0.0153846	1	FALSE	TRUE	FALSE	0.0305307	65	0	1	64	T	intron_variant	MODIFIER	ZK20.4	WBGene00013925	transcript	ZK20.4a.1	protein_coding
II	11649446	G	[T]	{G, T}	0.0185185	1	TRUE	FALSE	FALSE	0.0366909	54	0	1	53	T	intron_variant	MODIFIER	ZK20.4	WBGene00013925	transcript	ZK20.4a.1	protein_coding
II	11649446	GT	[GTT, G]	{G, GTT, GT}	0.1875	1	FALSE	TRUE	FALSE	0.307087	64	0	12	52	G	intron_variant	MODIFIER	ZK20.4	WBGene00013925	transcript	ZK20.4a.1	protein_coding
II	11649455	T	[A]	{A, T}	0.0923077	1	TRUE	FALSE	FALSE	0.168873	65	0	6	59	A	intron_variant	MODIFIER	ZK20.4	WBGene00013925	transcript	ZK20.4a.1	protein_coding
II	11649488	C	[A]	{C, A}	0.153846	1	TRUE	FALSE	FALSE	0.262373	65	0	10	55	A	intron_variant	MODIFIER	ZK20.4	WBGene00013925	transcript	ZK20.4a.1	protein_coding
II	11649511	G	[T]	{G, T}	0.0307692	1	TRUE	FALSE	FALSE	0.0601073	65	0	2	63	T	intron_variant	MODIFIER	ZK20.4	WBGene00013925	transcript	ZK20.4a.1	protein_coding
II	11649565	A	[T]	{A, T}	0.0461538	1	TRUE	FALSE	FALSE	0.0887299	65	0	3	62	T	intron_variant	MODIFIER	ZK20.4	WBGene00013925	transcript	ZK20.4a.1	protein_coding
II	11649566	C	[T]	{C, T}	0.0461538	1	TRUE	FALSE	TRUE	0.0887299	65	0	3	62	T	intron_variant	MODIFIER	ZK20.4	WBGene00013925	transcript	ZK20.4a.1	protein_coding
II	11649571	C	[A]	{C, A}	0.0461538	1	TRUE	FALSE	FALSE	0.0887299	65	0	3	62	A	intron_variant	MODIFIER	ZK20.4	WBGene00013925	transcript	ZK20.4a.1	protein_coding
II	11649572	A	[C]	{C, A}	0.0461538	1	TRUE	FALSE	FALSE	0.0887299	65	0	3	62	C	intron_variant	MODIFIER	ZK20.4	WBGene00013925	transcript	ZK20.4a.1	protein_coding
II	11649625	T	[C]	{C, T}	0.0153846	1	TRUE	FALSE	TRUE	0.0305307	65	0	1	64	C	intron_variant	MODIFIER	ZK20.4	WBGene00013925	transcript	ZK20.4a.1	protein_coding
II	11649662	A	[C]	{C, A}	0.153846	1	TRUE	FALSE	FALSE	0.262373	65	0	10	55	C	intron_variant	MODIFIER	ZK20.4	WBGene00013925	transcript	ZK20.4a.1	protein_coding
II	11649752	A	[C]	{C, A}	0.0153846	1	TRUE	FALSE	FALSE	0.0305307	65	0	1	64	C	intron_variant	MODIFIER	ZK20.4	WBGene00013925	transcript	ZK20.4a.1	protein_coding
II	11649772	G	[GT, GTT]	{G, GT}	0.0769231	1	FALSE	TRUE	FALSE	0.143113	65	0	5	60	GT	intron_variant	MODIFIER	ZK20.4	WBGene00013925	transcript	ZK20.4a.1	protein_coding
II	11649781	TG	[T, TCG]	{TG, TCG, T}	0.0307692	1	FALSE	TRUE	FALSE	0.0601073	65	0	2	63	TCG	intron_variant	MODIFIER	ZK20.4	WBGene00013925	transcript	ZK20.4a.1	protein_coding
II	11649987	C	[G]	{C, G}	0.0153846	1	TRUE	FALSE	FALSE	0.0305307	65	0	1	64	G	intron_variant	MODIFIER	ZK20.4	WBGene00013925	transcript	ZK20.4a.1	protein_coding
II	11650030	C	[T]	{C, T}	0.153846	1	TRUE	FALSE	TRUE	0.262373	65	0	10	55	T	intron_variant	MODIFIER	ZK20.4	WBGene00013925	transcript	ZK20.4a.1	protein_coding
II	11650068	G	[T]	{G, T}	0.0153846	1	TRUE	FALSE	FALSE	0.0305307	65	0	1	64	T	intron_variant	MODIFIER	ZK20.4	WBGene00013925	transcript	ZK20.4a.1	protein_coding
II	11650097	G	[T]	{G, T}	0.0153846	1	TRUE	FALSE	FALSE	0.0305307	65	0	1	64	T	intron_variant	MODIFIER	ZK20.4	WBGene00013925	transcript	ZK20.4a.1	protein_coding
II	11650098	A	[T]	{A, T}	0.0153846	1	TRUE	FALSE	FALSE	0.0305307	65	0	1	64	T	intron_variant	MODIFIER	ZK20.4	WBGene00013925	transcript	ZK20.4a.1	protein_coding
II	11650125	T	[A]	{A, T}	0.0769231	1	TRUE	FALSE	FALSE	0.143113	65	0	5	60	A	intron_variant	MODIFIER	ZK20.4	WBGene00013925	transcript	ZK20.4a.1	protein_coding
II	11650159	G	[T]	{G, T}	0.415385	1	TRUE	FALSE	FALSE	0.489445	65	0	27	38	T	intron_variant	MODIFIER	ZK20.4	WBGene00013925	transcript	ZK20.4a.1	protein_coding
II	11650176	A	[G]	{G, A}	0.0769231	1	TRUE	FALSE	TRUE	0.143113	65	0	5	60	G	intron_variant	MODIFIER	ZK20.4	WBGene00013925	transcript	ZK20.4a.1	protein_coding
II	11650362	A	[T]	{A, T}	0.0615385	1	TRUE	FALSE	FALSE	0.116398	65	0	4	61	T	intron_variant	MODIFIER	ZK20.4	WBGene00013925	transcript	ZK20.4a.1	protein_coding
II	11650378	A	[AT]	{AT, A}	0.169231	1	FALSE	TRUE	FALSE	0.283363	65	0	11	54	AT	intron_variant	MODIFIER	ZK20.4	WBGene00013925	transcript	ZK20.4a.1	protein_coding
II	11650579	CA	[C]	{C, CA}	0.0153846	1	FALSE	TRUE	FALSE	0.0305307	65	0	1	64	C	intron_variant	MODIFIER	ZK20.4	WBGene00013925	transcript	ZK20.4a.1	protein_coding
II	11651150	TTCAAG	[T]	{TTCAAG, T}	0.0153846	1	FALSE	TRUE	FALSE	0.0305307	65	0	1	64	T	5_prime_UTR_variant	MODIFIER	ZK20.4	WBGene00013925	transcript	ZK20.4a.1	protein_coding
II	11651152	C	[A]	{C, A}	0.0153846	1	TRUE	FALSE	FALSE	0.0305307	65	0	1	64	A	5_prime_UTR_variant	MODIFIER	ZK20.4	WBGene00013925	transcript	ZK20.4a.1	protein_coding
II	11651293	A	[G]	{G, A}	0.861538	1	TRUE	FALSE	TRUE	0.240429	65	0	56	9	G	3_prime_UTR_variant	MODIFIER	rad-23	WBGene00013924	transcript	ZK20.3.1	protein_coding
II	11651494	A	[T]	{A, T}	0.0153846	1	TRUE	FALSE	FALSE	0.0305307	65	0	1	64	T	3_prime_UTR_variant	MODIFIER	rad-23	WBGene00013924	transcript	ZK20.3.1	protein_coding
II	11651535	G	[A]	{G, A}	0.0153846	1	TRUE	FALSE	TRUE	0.0305307	65	0	1	64	A	3_prime_UTR_variant	MODIFIER	rad-23	WBGene00013924	transcript	ZK20.3.1	protein_coding
II	11651640	A	[C]	{C, A}	0.0153846	1	TRUE	FALSE	FALSE	0.0305307	65	0	1	64	C	intron_variant	MODIFIER	rad-23	WBGene00013924	transcript	ZK20.3.1	protein_coding
II	11652498	A	[G]	{G, A}	0.907692	1	TRUE	FALSE	TRUE	0.168873	65	0	59	6	G	intron_variant	MODIFIER	rad-23	WBGene00013924	transcript	ZK20.3.1	protein_coding
II	11652765	T	[C]	{C, T}	0.0769231	1	TRUE	FALSE	TRUE	0.143113	65	0	5	60	C	5_prime_UTR_variant	MODIFIER	rad-23	WBGene00013924	transcript	ZK20.3.1	protein_coding
II	11652771	G	[A]	{G, A}	0.0153846	1	TRUE	FALSE	TRUE	0.0305307	65	0	1	64	A	5_prime_UTR_variant	MODIFIER	rad-23	WBGene00013924	transcript	ZK20.3.1	protein_coding
II	11652844	A	[C]	{C, A}	0.0153846	1	TRUE	FALSE	FALSE	0.0305307	65	0	1	64	C	5_prime_UTR_variant	MODIFIER	rad-23	WBGene00013924	transcript	ZK20.3.1	protein_coding
II	11652876	C	[CA]	{C, CA}	0.0769231	1	FALSE	TRUE	FALSE	0.143113	65	0	5	60	CA	5_prime_UTR_variant	MODIFIER	rad-23	WBGene00013924	transcript	ZK20.3.1	protein_coding
II	11653335	G	[A]	{G, A}	0.184615	1	TRUE	FALSE	TRUE	0.303399	65	0	12	53	A	intron_variant	MODIFIER	rpn-12	WBGene00004468	transcript	ZK20.5.1	protein_coding
II	11653474	A	[G]	{G, A}	0.892308	1	TRUE	FALSE	TRUE	0.193679	65	0	58	7	G	intron_variant	MODIFIER	rpn-12	WBGene00004468	transcript	ZK20.5.1	protein_coding
II	11653475	AT	[A]	{AT, A}	0.0769231	1	FALSE	TRUE	FALSE	0.143113	65	0	5	60	A	intron_variant	MODIFIER	rpn-12	WBGene00004468	transcript	ZK20.5.1	protein_coding
II	11654159	C	[T]	{C, T}	0.0153846	1	TRUE	FALSE	TRUE	0.0305307	65	0	1	64	T	3_prime_UTR_variant	MODIFIER	rpn-12	WBGene00004468	transcript	ZK20.5.1	protein_coding
II	11654302	T	[A]	{A, T}	0.0769231	1	TRUE	FALSE	FALSE	0.143113	65	0	5	60	A	3_prime_UTR_variant	MODIFIER	nep-1	WBGene00013926	transcript	ZK20.6	protein_coding
II	11654307	GA	[G]	{G, GA}	0.0153846	1	FALSE	TRUE	FALSE	0.0305307	65	0	1	64	G	3_prime_UTR_variant	MODIFIER	nep-1	WBGene00013926	transcript	ZK20.6	protein_coding
II	11654447	G	[A]	{G, A}	0.0153846	1	TRUE	FALSE	TRUE	0.0305307	65	0	1	64	A	3_prime_UTR_variant	MODIFIER	nep-1	WBGene00013926	transcript	ZK20.6	protein_coding
II	11654582	T	[A]	{A, T}	0.0769231	1	TRUE	FALSE	FALSE	0.143113	65	0	5	60	A	intron_variant	MODIFIER	nep-1	WBGene00013926	transcript	ZK20.6	protein_coding
II	11654614	A	[C]	{C, A}	0.861538	1	TRUE	FALSE	FALSE	0.240429	65	0	56	9	C	intron_variant	MODIFIER	nep-1	WBGene00013926	transcript	ZK20.6	protein_coding
II	11654738	G	[A]	{G, A}	0.0769231	1	TRUE	FALSE	TRUE	0.143113	65	0	5	60	A	intron_variant	MODIFIER	nep-1	WBGene00013926	transcript	ZK20.6	protein_coding
II	11654817	T	[C]	{C, T}	0.0769231	1	TRUE	FALSE	TRUE	0.143113	65	0	5	60	C	intron_variant	MODIFIER	nep-1	WBGene00013926	transcript	ZK20.6	protein_coding
II	11654850	T	[G]	{G, T}	0.0153846	1	TRUE	FALSE	FALSE	0.0305307	65	0	1	64	G	intron_variant	MODIFIER	nep-1	WBGene00013926	transcript	ZK20.6	protein_coding
II	11655795	A	[T]	{A, T}	0.0153846	1	TRUE	FALSE	FALSE	0.0305307	65	0	1	64	T	intron_variant	MODIFIER	nep-1	WBGene00013926	transcript	ZK20.6	protein_coding
II	11656176	A	[C]	{C, A}	0.0153846	1	TRUE	FALSE	FALSE	0.0305307	65	0	1	64	C	intron_variant	MODIFIER	nep-1	WBGene00013926	transcript	ZK20.6	protein_coding
II	11656177	C	[T]	{C, T}	0.0153846	1	TRUE	FALSE	TRUE	0.0305307	65	0	1	64	T	intron_variant	MODIFIER	nep-1	WBGene00013926	transcript	ZK20.6	protein_coding
II	11657257	G	[A]	{G, A}	0.0769231	1	TRUE	FALSE	TRUE	0.143113	65	0	5	60	A	non_coding_transcript_exon_variant	MODIFIER	C47D12.9	WBGene00196859	transcript	C47D12.9	lincRNA
II	11657381	A	[C]	{C, A}	0.0153846	1	TRUE	FALSE	FALSE	0.0305307	65	0	1	64	C	non_coding_transcript_exon_variant	MODIFIER	C47D12.9	WBGene00196859	transcript	C47D12.9	lincRNA
II	11657383	A	[G]	{G, A}	0.0153846	1	TRUE	FALSE	TRUE	0.0305307	65	0	1	64	G	non_coding_transcript_exon_variant	MODIFIER	C47D12.9	WBGene00196859	transcript	C47D12.9	lincRNA
II	11661596	C	[T]	{C, T}	0.0151515	1	TRUE	FALSE	TRUE	0.0300717	66	0	1	65	T	3_prime_UTR_variant	MODIFIER	trr-1	WBGene00007028	transcript	C47D12.1a	protein_coding
II	11661602	C	[T]	{C, T}	0.0151515	1	TRUE	FALSE	TRUE	0.0300717	66	0	1	65	T	3_prime_UTR_variant	MODIFIER	trr-1	WBGene00007028	transcript	C47D12.1a	protein_coding
II	11661684	C	[G]	{C, G}	0.0606061	1	TRUE	FALSE	FALSE	0.114735	66	0	4	62	G	3_prime_UTR_variant	MODIFIER	trr-1	WBGene00007028	transcript	C47D12.1a	protein_coding
II	11661685	A	[T]	{A, T}	0.0151515	1	TRUE	FALSE	FALSE	0.0300717	66	0	1	65	T	3_prime_UTR_variant	MODIFIER	trr-1	WBGene00007028	transcript	C47D12.1a	protein_coding
II	11661774	A	[G]	{G, A}	0.0151515	1	TRUE	FALSE	TRUE	0.0300717	66	0	1	65	G	3_prime_UTR_variant	MODIFIER	trr-1	WBGene00007028	transcript	C47D12.1a	protein_coding
II	11661794	T	[C]	{C, T}	0.0151515	1	TRUE	FALSE	TRUE	0.0300717	66	0	1	65	C	3_prime_UTR_variant	MODIFIER	trr-1	WBGene00007028	transcript	C47D12.1a	protein_coding
II	11662499	T	[C]	{C, T}	0.0454545	1	TRUE	FALSE	TRUE	0.0874393	66	0	3	63	C	intron_variant	MODIFIER	trr-1	WBGene00007028	transcript	C47D12.1a	protein_coding
II	11663954	A	[C]	{C, A}	0.0151515	1	TRUE	FALSE	FALSE	0.0300717	66	0	1	65	C	intron_variant	MODIFIER	trr-1	WBGene00007028	transcript	C47D12.1a	protein_coding
II	11664410	AT	[A, ATT]	{AT, A}	0.0454545	1	FALSE	TRUE	FALSE	0.0874393	66	0	3	63	A	intron_variant	MODIFIER	trr-1	WBGene00007028	transcript	C47D12.1a	protein_coding
II	11665185	A	[AC]	{AC, A}	0.575758	1	FALSE	TRUE	FALSE	0.492251	66	0	38	28	AC	intron_variant	MODIFIER	trr-1	WBGene00007028	transcript	C47D12.1a	protein_coding
II	11665918	C	[CA, CAA]	{C, CAA, CA}	0.207692	1	FALSE	TRUE	FALSE	0.331664	65	1	13	51	CA	intron_variant	MODIFIER	trr-1	WBGene00007028	transcript	C47D12.1a	protein_coding
II	11665951	T	[A]	{A, T}	0.0151515	1	TRUE	FALSE	FALSE	0.0300717	66	0	1	65	A	intron_variant	MODIFIER	trr-1	WBGene00007028	transcript	C47D12.1a	protein_coding
II	11665976	G	[A, T]	{G, A}	0.0151515	1	TRUE	FALSE	FALSE	0.0300717	66	0	1	65	A	intron_variant	MODIFIER	trr-1	WBGene00007028	transcript	C47D12.1a	protein_coding
II	11665984	T	[TA]	{TA, T}	0.0151515	1	FALSE	TRUE	FALSE	0.0300717	66	0	1	65	TA	intron_variant	MODIFIER	trr-1	WBGene00007028	transcript	C47D12.1a	protein_coding
II	11666064	T	[A]	{A, T}	0.0151515	1	TRUE	FALSE	FALSE	0.0300717	66	0	1	65	A	intron_variant	MODIFIER	trr-1	WBGene00007028	transcript	C47D12.1a	protein_coding
II	11666152	G	[T]	{G, T}	0.0153846	1	TRUE	FALSE	FALSE	0.0305307	65	0	1	64	T	intron_variant	MODIFIER	trr-1	WBGene00007028	transcript	C47D12.1a	protein_coding
II	11666174	AT	[A]	{AT, A}	0.0151515	1	FALSE	TRUE	FALSE	0.0300717	66	0	1	65	A	intron_variant	MODIFIER	trr-1	WBGene00007028	transcript	C47D12.1a	protein_coding
II	11666181	T	[A]	{A, T}	0.0151515	1	TRUE	FALSE	FALSE	0.0300717	66	0	1	65	A	intron_variant	MODIFIER	trr-1	WBGene00007028	transcript	C47D12.1a	protein_coding
II	11666182	A	[T]	{A, T}	0.0454545	1	TRUE	FALSE	FALSE	0.0874393	66	0	3	63	T	intron_variant	MODIFIER	trr-1	WBGene00007028	transcript	C47D12.1a	protein_coding
II	11666222	AT	[A]	{AT, A}	0.0757576	1	FALSE	TRUE	FALSE	0.141106	66	0	5	61	A	intron_variant	MODIFIER	trr-1	WBGene00007028	transcript	C47D12.1a	protein_coding
II	11666260	AT	[A, ATT]	{ATT, AT, A}	0.0606061	1	FALSE	TRUE	FALSE	0.114735	66	0	4	62	A	intron_variant	MODIFIER	trr-1	WBGene00007028	transcript	C47D12.1a	protein_coding
II	11666281	T	[A]	{A, T}	0.227273	1	TRUE	FALSE	FALSE	0.353921	66	0	15	51	A	intron_variant	MODIFIER	trr-1	WBGene00007028	transcript	C47D12.1a	protein_coding
II	11666282	A	[T]	{A, T}	0.0757576	1	TRUE	FALSE	FALSE	0.141106	66	0	5	61	T	intron_variant	MODIFIER	trr-1	WBGene00007028	transcript	C47D12.1a	protein_coding
II	11666286	T	[A]	{A, T}	0.0151515	1	TRUE	FALSE	FALSE	0.0300717	66	0	1	65	A	intron_variant	MODIFIER	trr-1	WBGene00007028	transcript	C47D12.1a	protein_coding
II	11666354	C	[CT]	{C, CT}	0.142857	1	FALSE	TRUE	FALSE	0.246857	63	0	9	54	CT	intron_variant	MODIFIER	trr-1	WBGene00007028	transcript	C47D12.1a	protein_coding
II	11666362	A	[G]	{G, A}	0.0454545	1	TRUE	FALSE	TRUE	0.0874393	66	0	3	63	G	intron_variant	MODIFIER	trr-1	WBGene00007028	transcript	C47D12.1a	protein_coding
II	11666417	CT	[C]	{CT, C}	0.810345	1	FALSE	TRUE	FALSE	0.310045	58	0	47	11	C	intron_variant	MODIFIER	trr-1	WBGene00007028	transcript	C47D12.1a	protein_coding
II	11668958	A	[T]	{A, T}	0.0151515	1	TRUE	FALSE	FALSE	0.0300717	66	0	1	65	T	intron_variant	MODIFIER	trr-1	WBGene00007028	transcript	C47D12.1a	protein_coding
II	11668979	T	[A]	{A, T}	0.030303	1	TRUE	FALSE	FALSE	0.0592181	66	0	2	64	A	intron_variant	MODIFIER	trr-1	WBGene00007028	transcript	C47D12.1a	protein_coding
II	11669903	C	[CA]	{C, CA}	0.166667	1	FALSE	TRUE	FALSE	0.279898	66	0	11	55	CA	intron_variant	MODIFIER	trr-1	WBGene00007028	transcript	C47D12.1a	protein_coding
II	11669946	T	[G]	{G, T}	0.0151515	1	TRUE	FALSE	FALSE	0.0300717	66	0	1	65	G	intron_variant	MODIFIER	trr-1	WBGene00007028	transcript	C47D12.1a	protein_coding
II	11670000	A	[T]	{A, T}	0.0151515	1	TRUE	FALSE	FALSE	0.0300717	66	0	1	65	T	intron_variant	MODIFIER	trr-1	WBGene00007028	transcript	C47D12.1a	protein_coding
II	11670013	A	[T]	{A, T}	0.0757576	1	TRUE	FALSE	FALSE	0.141106	66	0	5	61	T	intron_variant	MODIFIER	trr-1	WBGene00007028	transcript	C47D12.1a	protein_coding
II	11670015	AT	[A]	{AT, A}	0.0151515	1	FALSE	TRUE	FALSE	0.0300717	66	0	1	65	A	intron_variant	MODIFIER	trr-1	WBGene00007028	transcript	C47D12.1a	protein_coding
II	11670016	T	[A]	{A, T}	0.0151515	1	TRUE	FALSE	FALSE	0.0300717	66	0	1	65	A	intron_variant	MODIFIER	trr-1	WBGene00007028	transcript	C47D12.1a	protein_coding
II	11672745	A	[G]	{G, A}	0.151515	1	TRUE	FALSE	TRUE	0.259079	66	0	10	56	G	intron_variant	MODIFIER	trr-1	WBGene00007028	transcript	C47D12.1a	protein_coding
II	11673192	G	[A]	{G, A}	0.272727	1	TRUE	FALSE	TRUE	0.399722	66	0	18	48	A	intron_variant	MODIFIER	trr-1	WBGene00007028	transcript	C47D12.1a	protein_coding
II	11674344	A	[G]	{G, A}	0.0151515	1	TRUE	FALSE	TRUE	0.0300717	66	0	1	65	G	intron_variant	MODIFIER	trr-1	WBGene00007028	transcript	C47D12.1a	protein_coding
II	11675695	T	[A]	{A, T}	0.0151515	1	TRUE	FALSE	FALSE	0.0300717	66	0	1	65	A	intron_variant	MODIFIER	trr-1	WBGene00007028	transcript	C47D12.1a	protein_coding
II	11676657	GA	[G]	{G, GA}	0.0151515	1	FALSE	TRUE	FALSE	0.0300717	66	0	1	65	G	intron_variant	MODIFIER	C47D12.2	WBGene00008136	transcript	C47D12.2	protein_coding
II	11676927	AT	[A]	{AT, A}	0.378788	1	FALSE	TRUE	FALSE	0.474208	66	0	25	41	A	intron_variant	MODIFIER	C47D12.2	WBGene00008136	transcript	C47D12.2	protein_coding
II	11676929	T	[A]	{A, T}	0.0175439	1	TRUE	FALSE	FALSE	0.0347772	57	0	1	56	A	intron_variant	MODIFIER	C47D12.2	WBGene00008136	transcript	C47D12.2	protein_coding
II	11676929	TTA	[T, TATA, TAATA]	{TTA, TATA, TAATA, T}	0.0833333	1	FALSE	TRUE	FALSE	0.154062	60	0	5	55	TATA	intron_variant	MODIFIER	C47D12.2	WBGene00008136	transcript	C47D12.2	protein_coding
II	11676930	T	[A]	{A, T}	0.25	1	TRUE	FALSE	FALSE	0.378261	58	1	14	43	A	intron_variant	MODIFIER	C47D12.2	WBGene00008136	transcript	C47D12.2	protein_coding
II	11676937	A	[AAT, AT]	{AAT, AT, A}	0.107692	1	FALSE	TRUE	FALSE	0.193679	65	0	7	58	AAT	intron_variant	MODIFIER	C47D12.2	WBGene00008136	transcript	C47D12.2	protein_coding
II	11676938	A	[ATC]	{ATC, A}	0.016129	1	FALSE	TRUE	FALSE	0.0319958	62	0	1	61	ATC	intron_variant	MODIFIER	C47D12.2	WBGene00008136	transcript	C47D12.2	protein_coding
II	11677081	A	[T]	{A, T}	0.0769231	1	TRUE	FALSE	FALSE	0.143113	65	0	5	60	T	intron_variant	MODIFIER	C47D12.2	WBGene00008136	transcript	C47D12.2	protein_coding
II	11677387	TA	[TAA, T]	{TAA, TA}	0.153846	1	FALSE	TRUE	FALSE	0.262373	65	0	10	55	T	intron_variant	MODIFIER	C47D12.2	WBGene00008136	transcript	C47D12.2	protein_coding
II	11677388	A	[T]	{A, T}	0.738462	1	TRUE	FALSE	FALSE	0.389267	65	0	48	17	T	intron_variant	MODIFIER	C47D12.2	WBGene00008136	transcript	C47D12.2	protein_coding
II	11677389	A	[T]	{A, T}	0.415385	1	TRUE	FALSE	FALSE	0.489445	65	0	27	38	T	intron_variant	MODIFIER	C47D12.2	WBGene00008136	transcript	C47D12.2	protein_coding
II	11677390	A	[T]	{A, T}	0.353846	1	TRUE	FALSE	FALSE	0.460823	65	0	23	42	T	intron_variant	MODIFIER	C47D12.2	WBGene00008136	transcript	C47D12.2	protein_coding
II	11677391	A	[T]	{A, T}	0.0769231	1	TRUE	FALSE	FALSE	0.143113	65	0	5	60	T	intron_variant	MODIFIER	C47D12.2	WBGene00008136	transcript	C47D12.2	protein_coding
II	11677396	A	[C]	{C, A}	0.0153846	1	TRUE	FALSE	FALSE	0.0305307	65	0	1	64	C	intron_variant	MODIFIER	C47D12.2	WBGene00008136	transcript	C47D12.2	protein_coding
II	11678138	GA	[G]	{G, GA}	0.0692308	1	FALSE	TRUE	FALSE	0.129875	65	1	4	60	G	intron_variant	MODIFIER	C47D12.2	WBGene00008136	transcript	C47D12.2	protein_coding
II	11678207	G	[A]	{G, A}	0.03125	1	TRUE	FALSE	TRUE	0.0610236	64	0	2	62	A	intron_variant	MODIFIER	C47D12.2	WBGene00008136	transcript	C47D12.2	protein_coding
II	11678222	A	[G]	{G, A}	0.015625	1	TRUE	FALSE	TRUE	0.0310039	64	0	1	63	G	intron_variant	MODIFIER	C47D12.2	WBGene00008136	transcript	C47D12.2	protein_coding
II	11678233	C	[T]	{C, T}	0.046875	1	TRUE	FALSE	TRUE	0.0900591	64	0	3	61	T	intron_variant	MODIFIER	C47D12.2	WBGene00008136	transcript	C47D12.2	protein_coding
II	11678252	C	[T]	{C, T}	0.046875	1	TRUE	FALSE	TRUE	0.0900591	64	0	3	61	T	intron_variant	MODIFIER	C47D12.2	WBGene00008136	transcript	C47D12.2	protein_coding
II	11678274	TAAAAATCG	[T]	{TAAAAATCG, T}	0.0923077	1	FALSE	TRUE	FALSE	0.168873	65	0	6	59	T	intron_variant	MODIFIER	C47D12.2	WBGene00008136	transcript	C47D12.2	protein_coding
II	11678344	GTT	[GT, GTTT, G]	{GTT, GTTT, GT}	0.107692	1	FALSE	TRUE	FALSE	0.193679	65	0	7	58	G	intron_variant	MODIFIER	C47D12.2	WBGene00008136	transcript	C47D12.2	protein_coding
II	11678353	T	[A]	{A, T}	0.153846	1	TRUE	FALSE	FALSE	0.262373	65	0	10	55	A	intron_variant	MODIFIER	C47D12.2	WBGene00008136	transcript	C47D12.2	protein_coding
II	11678595	C	[T]	{C, T}	0.015625	1	TRUE	FALSE	TRUE	0.0310039	64	0	1	63	T	intron_variant	MODIFIER	C47D12.2	WBGene00008136	transcript	C47D12.2	protein_coding
II	11679148	G	[A, T]	{G, A}	0.1875	1	TRUE	FALSE	FALSE	0.307087	64	0	12	52	A	3_prime_UTR_variant	MODIFIER	C47D12.2	WBGene00008136	transcript	C47D12.2	protein_coding
II	11680029	G	[A]	{G, A}	0.046875	1	TRUE	FALSE	TRUE	0.0900591	64	0	3	61	A	intron_variant	MODIFIER	sfxn-1.4	WBGene00008137	transcript	C47D12.3a	protein_coding
II	11680156	A	[G]	{G, A}	0.015625	1	TRUE	FALSE	TRUE	0.0310039	64	0	1	63	G	intron_variant	MODIFIER	sfxn-1.4	WBGene00008137	transcript	C47D12.3a	protein_coding
II	11680167	GA	[G]	{G, GA}	0.015625	1	FALSE	TRUE	FALSE	0.0310039	64	0	1	63	G	intron_variant	MODIFIER	sfxn-1.4	WBGene00008137	transcript	C47D12.3a	protein_coding
II	11680181	G	[A]	{G, A}	0.015625	1	TRUE	FALSE	TRUE	0.0310039	64	0	1	63	A	intron_variant	MODIFIER	sfxn-1.4	WBGene00008137	transcript	C47D12.3a	protein_coding
II	11680236	C	[T]	{C, T}	0.140625	1	TRUE	FALSE	TRUE	0.243602	64	0	9	55	T	intron_variant	MODIFIER	sfxn-1.4	WBGene00008137	transcript	C47D12.3a	protein_coding
II	11680250	G	[T]	{G, T}	0.015625	1	TRUE	FALSE	FALSE	0.0310039	64	0	1	63	T	intron_variant	MODIFIER	sfxn-1.4	WBGene00008137	transcript	C47D12.3a	protein_coding
II	11680447	G	[A]	{G, A}	0.078125	1	TRUE	FALSE	TRUE	0.145177	64	0	5	59	A	intron_variant	MODIFIER	sfxn-1.4	WBGene00008137	transcript	C47D12.3a	protein_coding
II	11680468	C	[T]	{C, T}	0.015625	1	TRUE	FALSE	TRUE	0.0310039	64	0	1	63	T	intron_variant	MODIFIER	sfxn-1.4	WBGene00008137	transcript	C47D12.3a	protein_coding
II	11680574	G	[A]	{G, A}	0.015625	1	TRUE	FALSE	TRUE	0.0310039	64	0	1	63	A	intron_variant	MODIFIER	sfxn-1.4	WBGene00008137	transcript	C47D12.3a	protein_coding
II	11680602	G	[C]	{C, G}	0.15625	1	TRUE	FALSE	FALSE	0.265748	64	0	10	54	C	intron_variant	MODIFIER	sfxn-1.4	WBGene00008137	transcript	C47D12.3a	protein_coding
II	11680628	C	[T]	{C, T}	0.28125	1	TRUE	FALSE	TRUE	0.40748	64	0	18	46	T	intron_variant	MODIFIER	sfxn-1.4	WBGene00008137	transcript	C47D12.3a	protein_coding
II	11680925	C	[G]	{C, G}	0.1875	1	TRUE	FALSE	FALSE	0.307087	64	0	12	52	G	intron_variant	MODIFIER	sfxn-1.4	WBGene00008137	transcript	C47D12.3a	protein_coding
II	11680930	GTT	[GT, G]	{G, GTT, GT}	0.5	1	FALSE	TRUE	FALSE	0.503937	64	0	32	32	G	intron_variant	MODIFIER	sfxn-1.4	WBGene00008137	transcript	C47D12.3a	protein_coding
II	11680944	C	[T]	{C, T}	0.015625	1	TRUE	FALSE	TRUE	0.0310039	64	0	1	63	T	intron_variant	MODIFIER	sfxn-1.4	WBGene00008137	transcript	C47D12.3a	protein_coding
II	11681828	G	[A]	{G, A}	0.03125	1	TRUE	FALSE	TRUE	0.0610236	64	0	2	62	A	5_prime_UTR_variant	MODIFIER	C47D12.4	WBGene00008138	transcript	C47D12.4	protein_coding
II	11683870	C	[G]	{C, G}	0.184615	1	TRUE	FALSE	FALSE	0.303399	65	0	12	53	G	intron_variant	MODIFIER	C47D12.5	WBGene00008139	transcript	C47D12.5	protein_coding
II	11684207	A	[C]	{C, A}	0.0153846	1	TRUE	FALSE	FALSE	0.0305307	65	0	1	64	C	intron_variant	MODIFIER	C47D12.5	WBGene00008139	transcript	C47D12.5	protein_coding
II	11684229	A	[C, T]	{C, A, T}	0.138462	1	TRUE	FALSE	FALSE	0.240429	65	0	9	56	C	intron_variant	MODIFIER	C47D12.5	WBGene00008139	transcript	C47D12.5	protein_coding
II	11684339	T	[C]	{C, T}	0.0461538	1	TRUE	FALSE	TRUE	0.0887299	65	0	3	62	C	intron_variant	MODIFIER	C47D12.5	WBGene00008139	transcript	C47D12.5	protein_coding
II	11684395	G	[GT]	{G, GT}	0.276923	1	FALSE	TRUE	FALSE	0.403578	65	0	18	47	GT	intron_variant	MODIFIER	C47D12.5	WBGene00008139	transcript	C47D12.5	protein_coding
II	11684426	A	[C]	{C, A}	0.0153846	1	TRUE	FALSE	FALSE	0.0305307	65	0	1	64	C	intron_variant	MODIFIER	C47D12.5	WBGene00008139	transcript	C47D12.5	protein_coding
II	11684566	T	[A]	{A, T}	0.0153846	1	TRUE	FALSE	FALSE	0.0305307	65	0	1	64	A	intron_variant	MODIFIER	C47D12.5	WBGene00008139	transcript	C47D12.5	protein_coding
II	11684625	G	[C]	{C, G}	0.0769231	1	TRUE	FALSE	FALSE	0.143113	65	0	5	60	C	intron_variant	MODIFIER	C47D12.5	WBGene00008139	transcript	C47D12.5	protein_coding
II	11684677	T	[A]	{A, T}	0.0461538	1	TRUE	FALSE	FALSE	0.0887299	65	0	3	62	A	intron_variant	MODIFIER	C47D12.5	WBGene00008139	transcript	C47D12.5	protein_coding
II	11684705	A	[G]	{G, A}	0.276923	1	TRUE	FALSE	TRUE	0.403578	65	0	18	47	G	intron_variant	MODIFIER	C47D12.5	WBGene00008139	transcript	C47D12.5	protein_coding
II	11684722	C	[A]	{C, A}	0.0769231	1	TRUE	FALSE	FALSE	0.143113	65	0	5	60	A	intron_variant	MODIFIER	C47D12.5	WBGene00008139	transcript	C47D12.5	protein_coding
II	11684737	A	[T]	{A, T}	0.476923	1	TRUE	FALSE	FALSE	0.502803	65	0	31	34	T	intron_variant	MODIFIER	C47D12.5	WBGene00008139	transcript	C47D12.5	protein_coding
II	11684738	A	[T]	{A, T}	0.0461538	1	TRUE	FALSE	FALSE	0.0887299	65	0	3	62	T	intron_variant	MODIFIER	C47D12.5	WBGene00008139	transcript	C47D12.5	protein_coding
II	11684739	A	[T]	{A, T}	0.0153846	1	TRUE	FALSE	FALSE	0.0305307	65	0	1	64	T	intron_variant	MODIFIER	C47D12.5	WBGene00008139	transcript	C47D12.5	protein_coding
II	11684808	C	[A]	{C, A}	0.0153846	1	TRUE	FALSE	FALSE	0.0305307	65	0	1	64	A	intron_variant	MODIFIER	C47D12.5	WBGene00008139	transcript	C47D12.5	protein_coding
II	11684855	T	[A]	{A, T}	0.0461538	1	TRUE	FALSE	FALSE	0.0887299	65	0	3	62	A	intron_variant	MODIFIER	C47D12.5	WBGene00008139	transcript	C47D12.5	protein_coding
II	11684888	G	[C]	{C, G}	0.0153846	1	TRUE	FALSE	FALSE	0.0305307	65	0	1	64	C	intron_variant	MODIFIER	C47D12.5	WBGene00008139	transcript	C47D12.5	protein_coding
II	11684895	T	[A]	{A, T}	0.584615	1	TRUE	FALSE	FALSE	0.489445	65	0	38	27	A	intron_variant	MODIFIER	C47D12.5	WBGene00008139	transcript	C47D12.5	protein_coding
II	11684918	G	[A]	{G, A}	0.0461538	1	TRUE	FALSE	TRUE	0.0887299	65	0	3	62	A	intron_variant	MODIFIER	C47D12.5	WBGene00008139	transcript	C47D12.5	protein_coding
II	11684924	C	[CT]	{C, CT}	0.0625	1	FALSE	TRUE	FALSE	0.11811	64	0	4	60	CT	intron_variant	MODIFIER	C47D12.5	WBGene00008139	transcript	C47D12.5	protein_coding
II	11685154	A	[G]	{G, A}	0.0153846	1	TRUE	FALSE	TRUE	0.0305307	65	0	1	64	G	intron_variant	MODIFIER	C47D12.5	WBGene00008139	transcript	C47D12.5	protein_coding
II	11689159	T	[C]	{C, T}	0.0153846	1	TRUE	FALSE	TRUE	0.0305307	65	0	1	64	C	intron_variant	MODIFIER	kel-1	WBGene00002184	transcript	C47D12.7a	protein_coding
II	11689169	T	[G]	{G, T}	0.153846	1	TRUE	FALSE	FALSE	0.262373	65	0	10	55	G	intron_variant	MODIFIER	kel-1	WBGene00002184	transcript	C47D12.7a	protein_coding
II	11689379	C	[A]	{C, A}	0.0153846	1	TRUE	FALSE	FALSE	0.0305307	65	0	1	64	A	intron_variant	MODIFIER	kel-1	WBGene00002184	transcript	C47D12.7a	protein_coding
II	11689524	A	[G]	{G, A}	0.169231	1	TRUE	FALSE	TRUE	0.283363	65	0	11	54	G	intron_variant	MODIFIER	kel-1	WBGene00002184	transcript	C47D12.7a	protein_coding
II	11689564	T	[C]	{C, T}	0.0153846	1	TRUE	FALSE	TRUE	0.0305307	65	0	1	64	C	intron_variant	MODIFIER	kel-1	WBGene00002184	transcript	C47D12.7a	protein_coding
II	11689587	T	[C]	{C, T}	0.0153846	1	TRUE	FALSE	TRUE	0.0305307	65	0	1	64	C	intron_variant	MODIFIER	kel-1	WBGene00002184	transcript	C47D12.7a	protein_coding
II	11689600	CTAACGATTAAAGTACTGAA	[C]	{C, CTAACGATTAAAGTACTGAA}	0.0153846	1	FALSE	TRUE	FALSE	0.0305307	65	0	1	64	C	intron_variant	MODIFIER	kel-1	WBGene00002184	transcript	C47D12.7a	protein_coding
II	11689601	TAACGATTAAAGTACTGAAA	[T]	{TAACGATTAAAGTACTGAAA, T}	0.0769231	1	FALSE	TRUE	FALSE	0.143113	65	0	5	60	T	intron_variant	MODIFIER	kel-1	WBGene00002184	transcript	C47D12.7a	protein_coding
II	11689624	G	[A]	{G, A}	0.0461538	1	TRUE	FALSE	TRUE	0.0887299	65	0	3	62	A	intron_variant	MODIFIER	kel-1	WBGene00002184	transcript	C47D12.7a	protein_coding
II	11690018	CAA	[CA, C]	{C, CAA, CA}	0.261538	1	FALSE	TRUE	FALSE	0.389267	65	0	17	48	C	intron_variant	MODIFIER	kel-1	WBGene00002184	transcript	C47D12.7a	protein_coding
II	11690031	GA	[G]	{G, GA}	0.0307692	1	FALSE	TRUE	FALSE	0.0601073	65	0	2	63	G	intron_variant	MODIFIER	kel-1	WBGene00002184	transcript	C47D12.7a	protein_coding
II	11690145	A	[AT, ATT]	{ATT, AT, A}	0.476923	1	FALSE	TRUE	FALSE	0.502803	65	0	31	34	AT	intron_variant	MODIFIER	kel-1	WBGene00002184	transcript	C47D12.7a	protein_coding
II	11690149	T	[TTA]	{TTA, T}	0.016129	1	FALSE	TRUE	FALSE	0.0319958	62	0	1	61	TTA	intron_variant	MODIFIER	kel-1	WBGene00002184	transcript	C47D12.7a	protein_coding
II	11690190	G	[A]	{G, A}	0.907692	1	TRUE	FALSE	TRUE	0.168873	65	0	59	6	A	intron_variant	MODIFIER	kel-1	WBGene00002184	transcript	C47D12.7a	protein_coding
II	11690223	AT	[A]	{AT, A}	0.0769231	1	FALSE	TRUE	FALSE	0.143113	65	0	5	60	A	intron_variant	MODIFIER	kel-1	WBGene00002184	transcript	C47D12.7a	protein_coding
II	11690227	CTT	[C, CT]	{CT, CTT}	0.421875	1	FALSE	TRUE	FALSE	0.491634	64	0	27	37	C	intron_variant	MODIFIER	kel-1	WBGene00002184	transcript	C47D12.7a	protein_coding
II	11690504	G	[A]	{G, A}	0.015625	1	TRUE	FALSE	TRUE	0.0310039	64	0	1	63	A	intron_variant	MODIFIER	kel-1	WBGene00002184	transcript	C47D12.7a	protein_coding
II	11690543	A	[T]	{A, T}	0.015625	1	TRUE	FALSE	FALSE	0.0310039	64	0	1	63	T	intron_variant	MODIFIER	kel-1	WBGene00002184	transcript	C47D12.7a	protein_coding
II	11691375	A	[C]	{C, A}	0.078125	1	TRUE	FALSE	FALSE	0.145177	64	0	5	59	C	3_prime_UTR_variant	MODIFIER	tars-1	WBGene00006617	transcript	C47D12.6a	protein_coding
II	11692055	T	[A]	{A, T}	0.015625	1	TRUE	FALSE	FALSE	0.0310039	64	0	1	63	A	intron_variant	MODIFIER	kel-1	WBGene00002184	transcript	C47D12.7a	protein_coding
II	11692406	G	[GTT, GT]	{G, GTT, GT}	0.0923077	1	FALSE	TRUE	FALSE	0.168873	65	0	6	59	GT	intron_variant	MODIFIER	kel-1	WBGene00002184	transcript	C47D12.7a	protein_coding
II	11692430	T	[A]	{A, T}	0.0769231	1	TRUE	FALSE	FALSE	0.143113	65	0	5	60	A	intron_variant	MODIFIER	kel-1	WBGene00002184	transcript	C47D12.7a	protein_coding
II	11692511	ATT	[ATTT, A]	{ATT, ATTT}	0.0769231	1	FALSE	TRUE	FALSE	0.143113	65	0	5	60	A	intron_variant	MODIFIER	kel-1	WBGene00002184	transcript	C47D12.7a	protein_coding
II	11692592	GA	[G]	{G, GA}	0.0769231	1	FALSE	TRUE	FALSE	0.143113	65	0	5	60	G	intron_variant	MODIFIER	kel-1	WBGene00002184	transcript	C47D12.7a	protein_coding
II	11692645	A	[G]	{G, A}	0.323077	1	TRUE	FALSE	TRUE	0.440787	65	0	21	44	G	intron_variant	MODIFIER	kel-1	WBGene00002184	transcript	C47D12.7a	protein_coding
II	11692664	C	[G]	{C, G}	0.0153846	1	TRUE	FALSE	FALSE	0.0305307	65	0	1	64	G	intron_variant	MODIFIER	kel-1	WBGene00002184	transcript	C47D12.7a	protein_coding
II	11693727	A	[G]	{G, A}	0.0461538	1	TRUE	FALSE	TRUE	0.0887299	65	0	3	62	G	intron_variant	MODIFIER	kel-1	WBGene00002184	transcript	C47D12.7a	protein_coding
II	11693729	A	[G]	{G, A}	0.0769231	1	TRUE	FALSE	TRUE	0.143113	65	0	5	60	G	intron_variant	MODIFIER	kel-1	WBGene00002184	transcript	C47D12.7a	protein_coding
II	11694085	T	[TA]	{TA, T}	0.446154	1	FALSE	TRUE	FALSE	0.498032	65	0	29	36	TA	5_prime_UTR_variant	MODIFIER	tars-1	WBGene00006617	transcript	C47D12.6b.2	protein_coding
II	11694415	A	[ACAT]	{ACAT, A}	0.0153846	1	FALSE	TRUE	FALSE	0.0305307	65	0	1	64	ACAT	intron_variant	MODIFIER	kel-1	WBGene00002184	transcript	C47D12.7a	protein_coding
II	11694502	C	[G]	{C, G}	0.169231	1	TRUE	FALSE	FALSE	0.283363	65	0	11	54	G	intron_variant	MODIFIER	kel-1	WBGene00002184	transcript	C47D12.7a	protein_coding
II	11694532	T	[TA]	{TA, T}	0.0153846	1	FALSE	TRUE	FALSE	0.0305307	65	0	1	64	TA	intron_variant	MODIFIER	kel-1	WBGene00002184	transcript	C47D12.7a	protein_coding
II	11694590	A	[G]	{G, A}	0.0153846	1	TRUE	FALSE	TRUE	0.0305307	65	0	1	64	G	intron_variant	MODIFIER	kel-1	WBGene00002184	transcript	C47D12.7a	protein_coding
II	11694645	A	[G]	{G, A}	0.0769231	1	TRUE	FALSE	TRUE	0.143113	65	0	5	60	G	5_prime_UTR_variant	MODIFIER	kel-1	WBGene00002184	transcript	C47D12.7b	protein_coding
II	11694654	C	[T]	{C, T}	0.0461538	1	TRUE	FALSE	TRUE	0.0887299	65	0	3	62	T	5_prime_UTR_variant	MODIFIER	kel-1	WBGene00002184	transcript	C47D12.7b	protein_coding
II	11694957	A	[G]	{G, A}	0.0769231	1	TRUE	FALSE	TRUE	0.143113	65	0	5	60	G	intron_variant	MODIFIER	kel-1	WBGene00002184	transcript	C47D12.7a	protein_coding
II	11695079	AT	[A]	{AT, A}	0.0153846	1	FALSE	TRUE	FALSE	0.0305307	65	0	1	64	A	intron_variant	MODIFIER	kel-1	WBGene00002184	transcript	C47D12.7a	protein_coding
II	11695252	G	[C]	{C, G}	0.138462	1	TRUE	FALSE	FALSE	0.240429	65	0	9	56	C	intron_variant	MODIFIER	kel-1	WBGene00002184	transcript	C47D12.7a	protein_coding
II	11695285	T	[G]	{G, T}	0.307692	1	TRUE	FALSE	FALSE	0.429338	65	0	20	45	G	intron_variant	MODIFIER	kel-1	WBGene00002184	transcript	C47D12.7a	protein_coding
II	11695341	A	[G]	{G, A}	0.169231	1	TRUE	FALSE	TRUE	0.283363	65	0	11	54	G	intron_variant	MODIFIER	kel-1	WBGene00002184	transcript	C47D12.7a	protein_coding
II	11695473	C	[T]	{C, T}	0.138462	1	TRUE	FALSE	TRUE	0.240429	65	0	9	56	T	intron_variant	MODIFIER	kel-1	WBGene00002184	transcript	C47D12.7a	protein_coding
II	11695583	T	[A]	{A, T}	0.0153846	1	TRUE	FALSE	FALSE	0.0305307	65	0	1	64	A	5_prime_UTR_variant	MODIFIER	tars-1	WBGene00006617	transcript	C47D12.6b.1	protein_coding
II	11695732	C	[A]	{C, A}	0.153846	1	TRUE	FALSE	FALSE	0.262373	65	0	10	55	A	intron_variant	MODIFIER	kel-1	WBGene00002184	transcript	C47D12.7a	protein_coding
II	11695930	GT	[G]	{G, GT}	0.353846	1	FALSE	TRUE	FALSE	0.460823	65	0	23	42	G	intron_variant	MODIFIER	kel-1	WBGene00002184	transcript	C47D12.7a	protein_coding
II	11696630	T	[C]	{C, T}	0.307692	1	TRUE	FALSE	TRUE	0.429338	65	0	20	45	C	intron_variant	MODIFIER	xpf-1	WBGene00008140	transcript	C47D12.8.1	protein_coding
II	11697416	TCG	[T]	{TCG, T}	0.015873	1	FALSE	TRUE	FALSE	0.0314921	63	0	1	62	T	intron_variant	MODIFIER	xpf-1	WBGene00008140	transcript	C47D12.8.1	protein_coding
II	11697510	AT	[A]	{AT, A}	0.0163934	1	FALSE	TRUE	FALSE	0.0325159	61	0	1	60	A	intron_variant	MODIFIER	xpf-1	WBGene00008140	transcript	C47D12.8.1	protein_coding
II	11697656	C	[T]	{C, T}	0.015625	1	TRUE	FALSE	TRUE	0.0310039	64	0	1	63	T	intron_variant	MODIFIER	xpf-1	WBGene00008140	transcript	C47D12.8.1	protein_coding
II	11697680	T	[A]	{A, T}	0.015625	1	TRUE	FALSE	FALSE	0.0310039	64	0	1	63	A	intron_variant	MODIFIER	xpf-1	WBGene00008140	transcript	C47D12.8.1	protein_coding
II	11697715	T	[C]	{C, T}	0.015625	1	TRUE	FALSE	TRUE	0.0310039	64	0	1	63	C	intron_variant	MODIFIER	xpf-1	WBGene00008140	transcript	C47D12.8.1	protein_coding
II	11697749	GT	[G]	{G, GT}	0.133333	1	FALSE	TRUE	FALSE	0.233053	60	0	8	52	G	intron_variant	MODIFIER	xpf-1	WBGene00008140	transcript	C47D12.8.1	protein_coding
II	11697763	C	[T]	{C, T}	0.126984	1	TRUE	FALSE	TRUE	0.223492	63	0	8	55	T	intron_variant	MODIFIER	xpf-1	WBGene00008140	transcript	C47D12.8.1	protein_coding
II	11697776	A	[C]	{C, A}	0.142857	1	TRUE	FALSE	FALSE	0.246857	63	0	9	54	C	intron_variant	MODIFIER	xpf-1	WBGene00008140	transcript	C47D12.8.1	protein_coding
II	11697779	T	[A]	{A, T}	0.142857	1	TRUE	FALSE	FALSE	0.246857	63	0	9	54	A	intron_variant	MODIFIER	xpf-1	WBGene00008140	transcript	C47D12.8.1	protein_coding
II	11697806	GA	[G]	{G, GA}	0.078125	1	FALSE	TRUE	FALSE	0.145177	64	0	5	59	G	intron_variant	MODIFIER	xpf-1	WBGene00008140	transcript	C47D12.8.1	protein_coding
II	11697813	G	[C]	{C, G}	0.140625	1	TRUE	FALSE	FALSE	0.243602	64	0	9	55	C	intron_variant	MODIFIER	xpf-1	WBGene00008140	transcript	C47D12.8.1	protein_coding
II	11697864	G	[A]	{G, A}	0.0307692	1	TRUE	FALSE	TRUE	0.0601073	65	0	2	63	A	intron_variant	MODIFIER	xpf-1	WBGene00008140	transcript	C47D12.8.1	protein_coding
II	11698363	G	[T]	{G, T}	0.0153846	1	TRUE	FALSE	FALSE	0.0305307	65	0	1	64	T	3_prime_UTR_variant	MODIFIER	inos-1	WBGene00012148	transcript	VF13D12L.1	protein_coding
II	11698371	G	[A]	{G, A}	0.0153846	1	TRUE	FALSE	TRUE	0.0305307	65	0	1	64	A	3_prime_UTR_variant	MODIFIER	inos-1	WBGene00012148	transcript	VF13D12L.1	protein_coding
II	11698778	T	[G]	{G, T}	0.0461538	1	TRUE	FALSE	FALSE	0.0887299	65	0	3	62	G	intron_variant	MODIFIER	xpf-1	WBGene00008140	transcript	C47D12.8.1	protein_coding
II	11698785	G	[A]	{G, A}	0.0461538	1	TRUE	FALSE	TRUE	0.0887299	65	0	3	62	A	intron_variant	MODIFIER	xpf-1	WBGene00008140	transcript	C47D12.8.1	protein_coding
II	11698789	A	[C]	{C, A}	0.0461538	1	TRUE	FALSE	FALSE	0.0887299	65	0	3	62	C	intron_variant	MODIFIER	xpf-1	WBGene00008140	transcript	C47D12.8.1	protein_coding
II	11698790	A	[T]	{A, T}	0.0461538	1	TRUE	FALSE	FALSE	0.0887299	65	0	3	62	T	intron_variant	MODIFIER	xpf-1	WBGene00008140	transcript	C47D12.8.1	protein_coding
II	11698793	T	[C]	{C, T}	0.0461538	1	TRUE	FALSE	TRUE	0.0887299	65	0	3	62	C	intron_variant	MODIFIER	xpf-1	WBGene00008140	transcript	C47D12.8.1	protein_coding
II	11698794	A	[C]	{C, A}	0.0461538	1	TRUE	FALSE	FALSE	0.0887299	65	0	3	62	C	intron_variant	MODIFIER	xpf-1	WBGene00008140	transcript	C47D12.8.1	protein_coding
II	11698797	T	[G]	{G, T}	0.0461538	1	TRUE	FALSE	FALSE	0.0887299	65	0	3	62	G	intron_variant	MODIFIER	xpf-1	WBGene00008140	transcript	C47D12.8.1	protein_coding
II	11698798	G	[C]	{C, G}	0.0461538	1	TRUE	FALSE	FALSE	0.0887299	65	0	3	62	C	intron_variant	MODIFIER	xpf-1	WBGene00008140	transcript	C47D12.8.1	protein_coding
II	11699780	C	[CA, CAA]	{C, CAA, CA}	0.0461538	1	FALSE	TRUE	FALSE	0.0887299	65	0	3	62	CA	intron_variant	MODIFIER	xpf-1	WBGene00008140	transcript	C47D12.8.1	protein_coding
II	11699888	C	[T]	{C, T}	0.0461538	1	TRUE	FALSE	TRUE	0.0887299	65	0	3	62	T	intron_variant	MODIFIER	xpf-1	WBGene00008140	transcript	C47D12.8.1	protein_coding
II	11699917	A	[G]	{G, A}	0.0769231	1	TRUE	FALSE	TRUE	0.143113	65	0	5	60	G	intron_variant	MODIFIER	xpf-1	WBGene00008140	transcript	C47D12.8.1	protein_coding
II	11700408	G	[A]	{G, A}	0.0153846	1	TRUE	FALSE	TRUE	0.0305307	65	0	1	64	A	intron_variant	MODIFIER	xpf-1	WBGene00008140	transcript	C47D12.8.1	protein_coding
II	11700588	AT	[A]	{AT, A}	0.30303	1	FALSE	TRUE	FALSE	0.42563	66	0	20	46	A	intron_variant	MODIFIER	xpf-1	WBGene00008140	transcript	C47D12.8.1	protein_coding
II	11700699	CA	[C]	{C, CA}	0.0151515	1	FALSE	TRUE	FALSE	0.0300717	66	0	1	65	C	intron_variant	MODIFIER	xpf-1	WBGene00008140	transcript	C47D12.8.1	protein_coding
[truncated: 3,983 more rows]

## Sheet: Other
CHROM	POS	REF	ALT	allele_set	aaf	call_rate	is_snp	is_indel	is_transition	nucl_diversity	num_called	num_het	num_hom_alt	num_hom_ref	ANN	Mutation type	Impact	Gene name	WBGene ID	Transcript?	Gene ID	Gene Type
[truncated: 3,064 more rows]
